# Supplementary material for: Facile access to functionalized indenes and fused quinolines by regioselective 5-enolexo-dig Michael addition and cyclization reactions
Source: Royal Society of Chemistry journal article supplement (doi:10.1039/c7ob02498c), 2017-01-01
Supplement: c7ob02498c1.pdf [file c7ob02498c1.pdf]

## Supporting Information

### A Facile access to functionalized indenenes and fused quinolines by regioselective 5-*enolexo*-dig Michael addition and cyclization reaction

Tohasib Yusub Chaudhari,<sup>a</sup> Sandeep K. Ginotra<sup>b</sup> and Vibha Tandon<sup>\*a</sup>

<sup>a</sup>Special Centre for Molecular Medicine, Jawaharlal Nehru University, New Delhi-110067

<sup>b</sup>Department of Chemistry, University of Delhi, New Delh-110007

| Sr. No. | Index                                                                             | Page no.  |
|---------|-----------------------------------------------------------------------------------|-----------|
| 1.      | <sup>1</sup> H, <sup>13</sup> C NMR and HRMS spectra of substrates <b>3a-o</b>    | S2-S31    |
| 2.      | <sup>1</sup> H, <sup>13</sup> C NMR and HRMS spectra of <b>5a-7h</b> and <b>8</b> | S32-S101  |
| 3.      | X-ray crystal structure data of ( <b>8a</b> )                                     | S102-S105 |

# 1. $^1\text{H}$ , $^{13}\text{C}$ NMR and HRMS spectra of chalcone substrates 3a-o

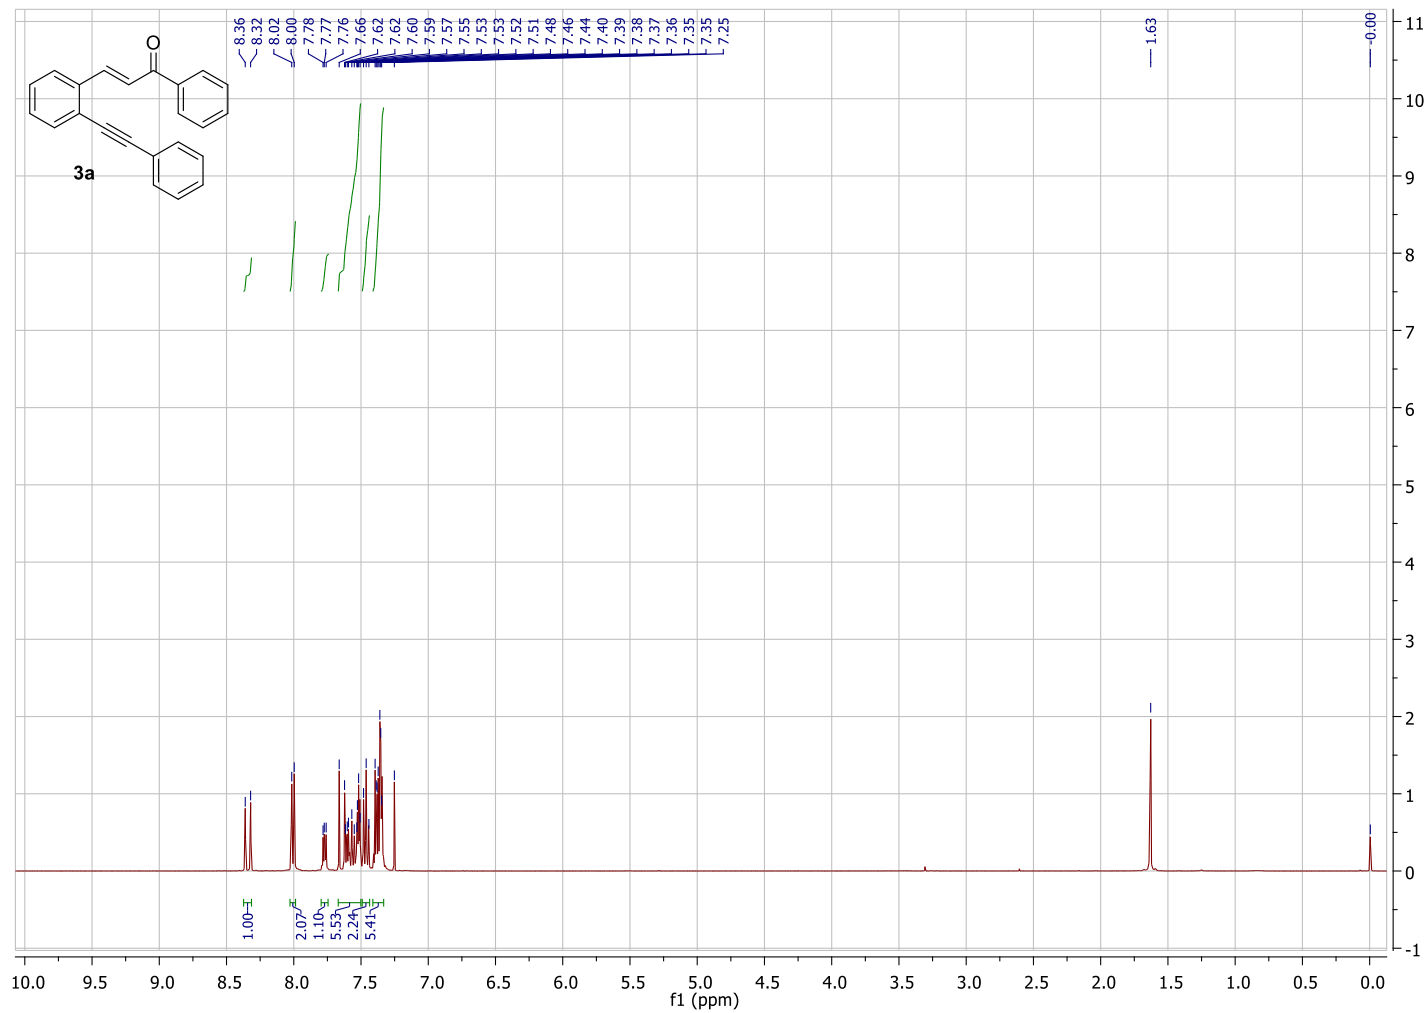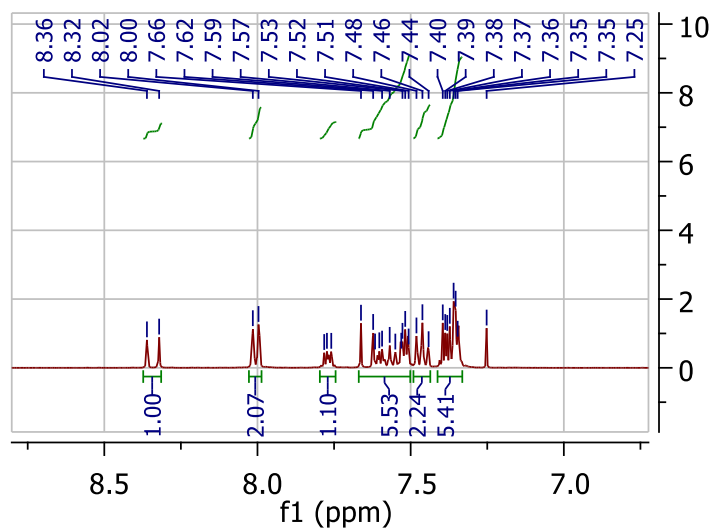

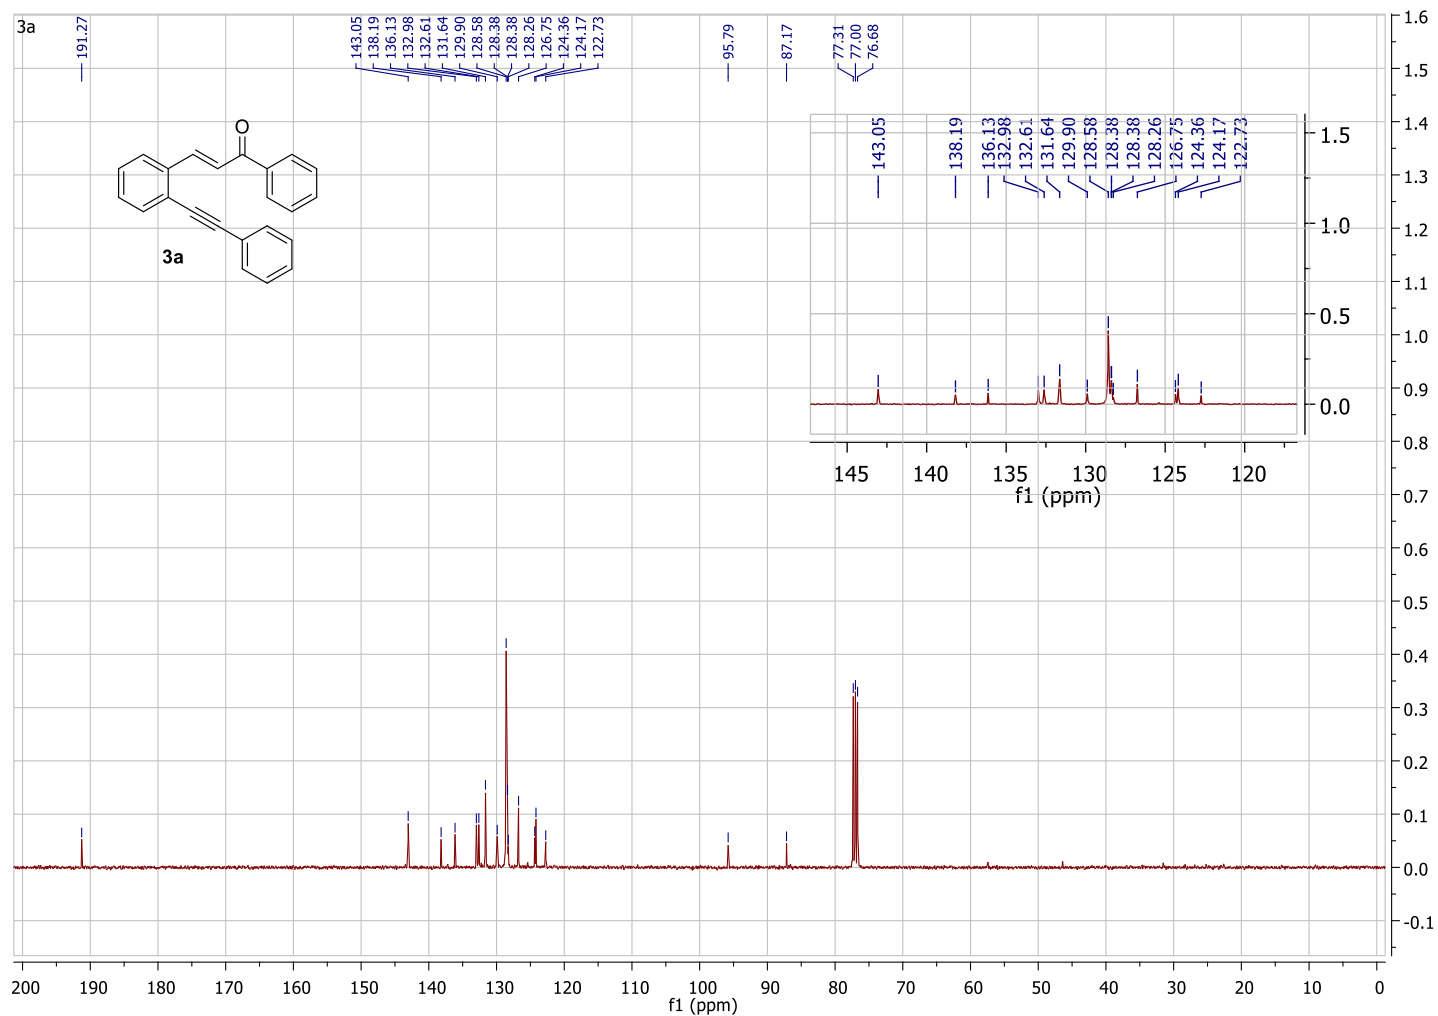

**HRMS: (3a):**

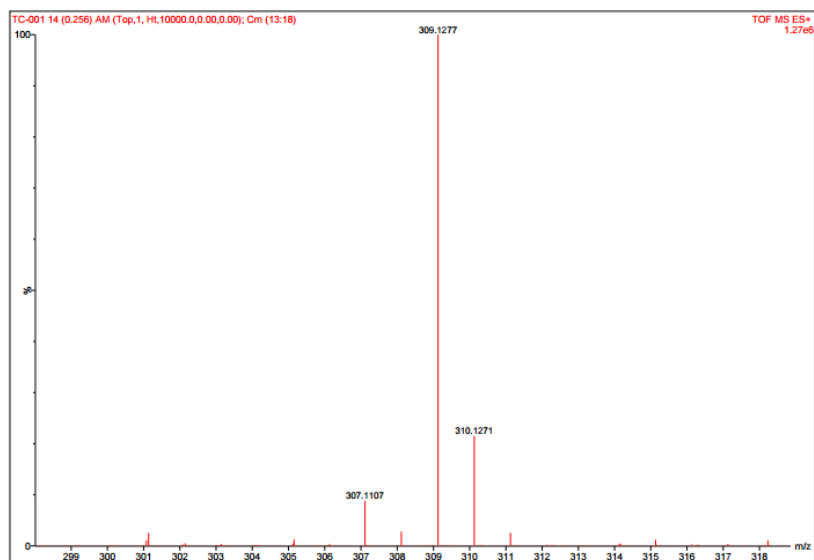

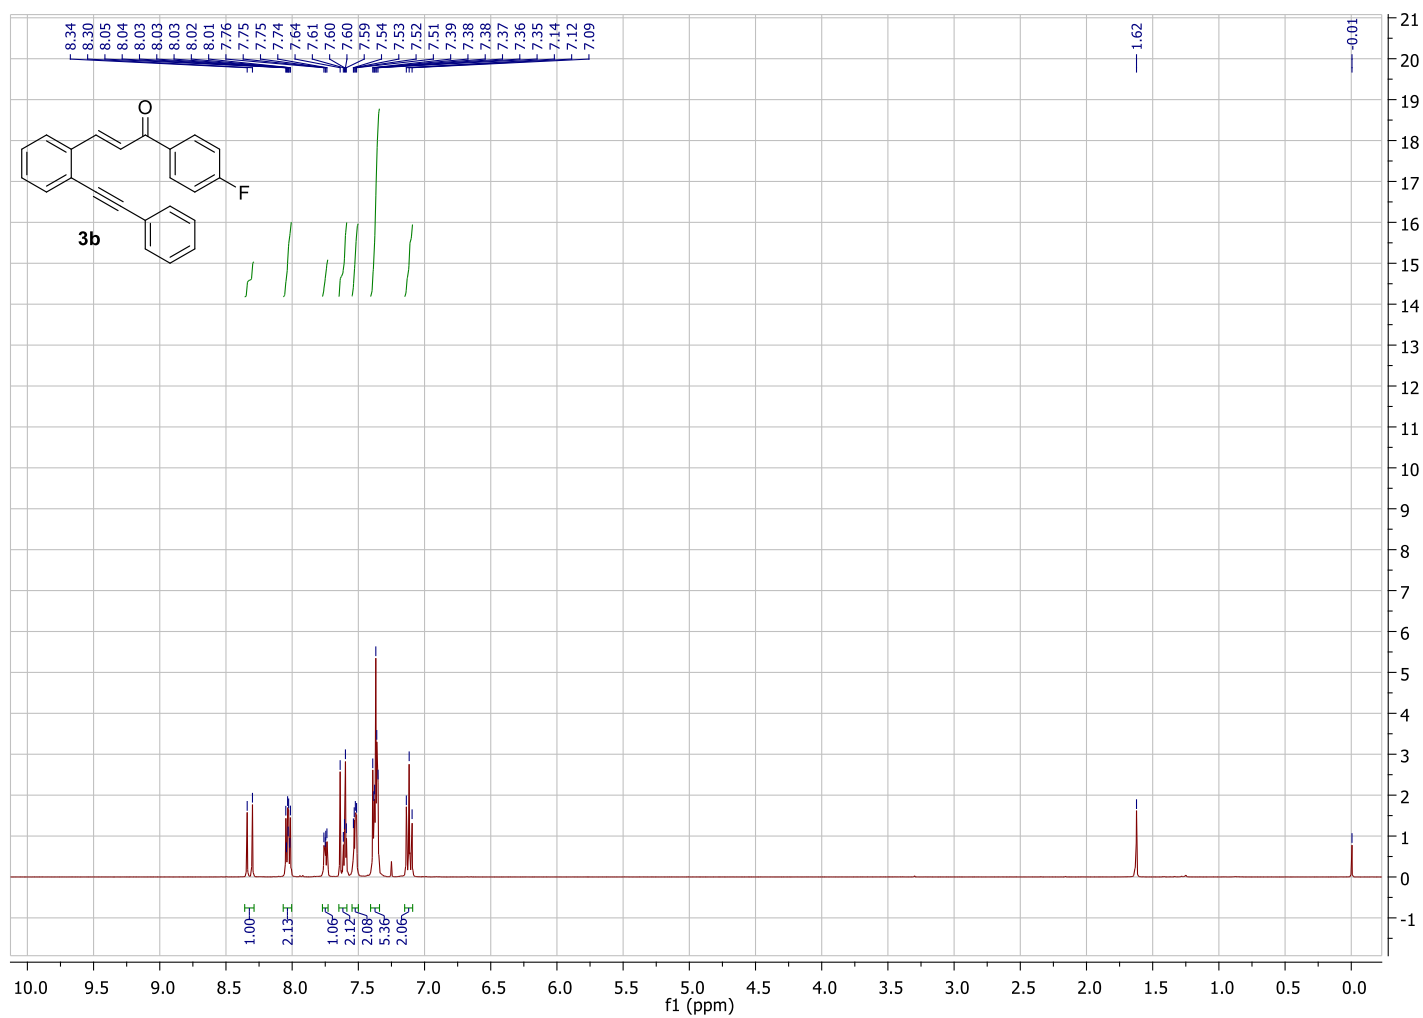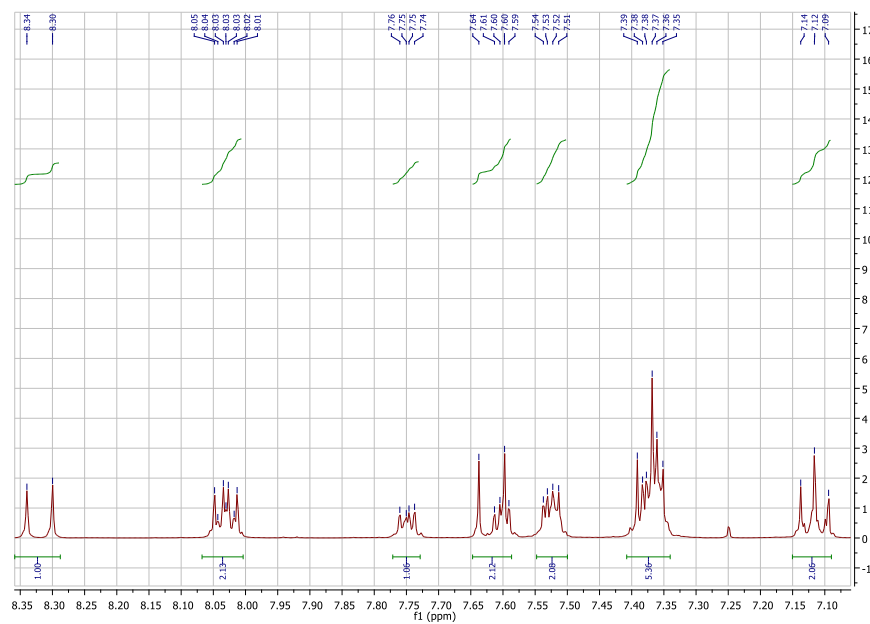



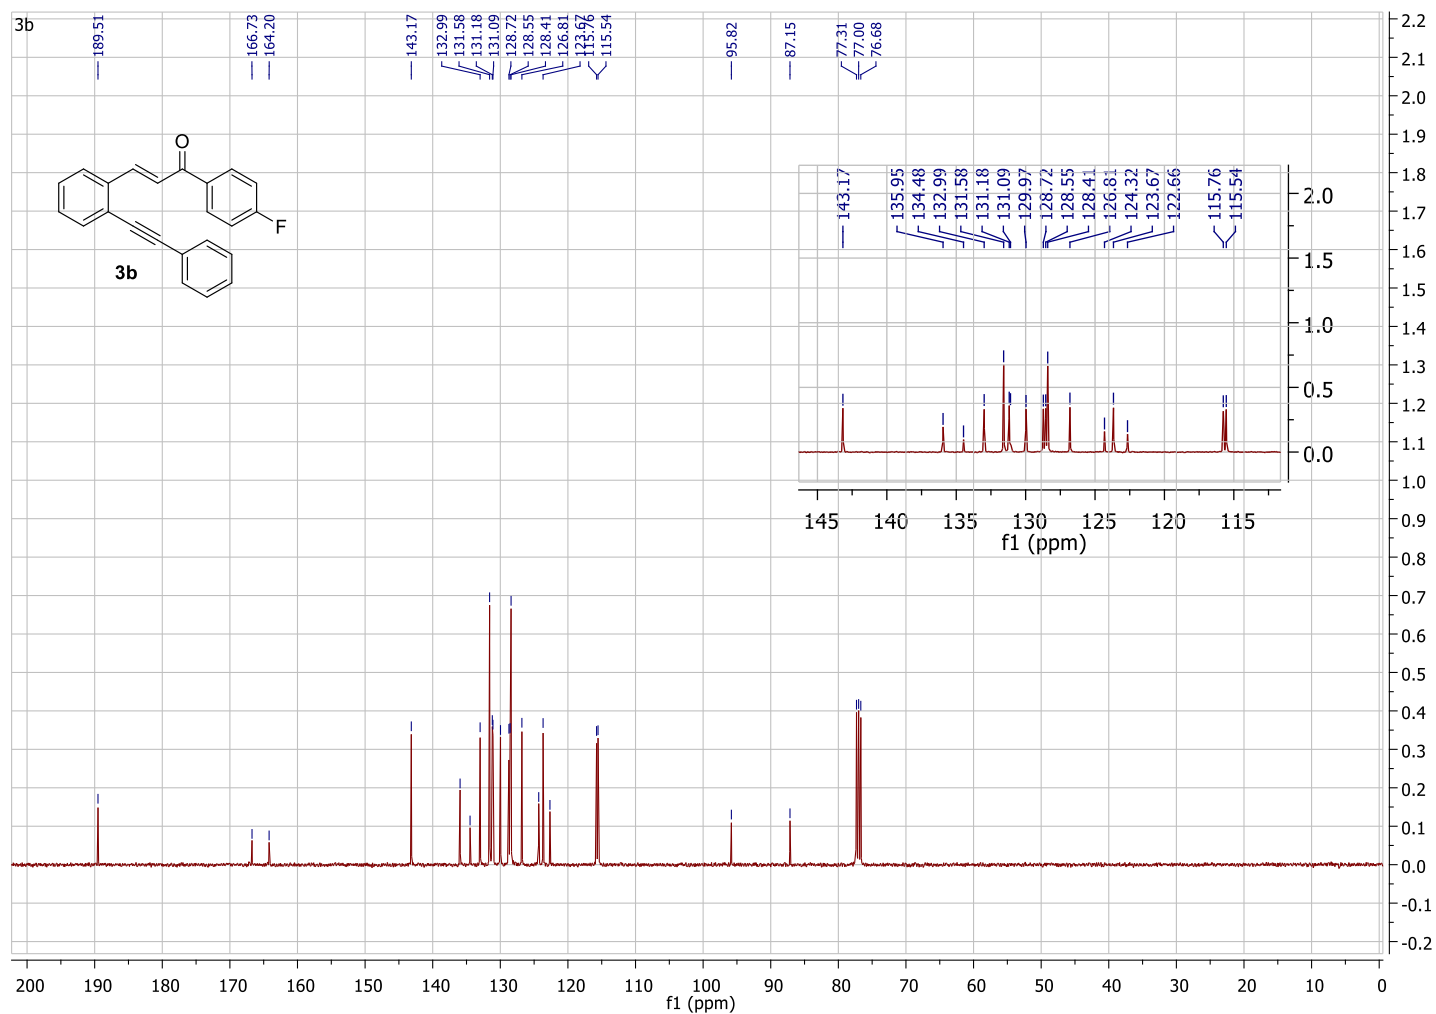

### HRMS: (3b)

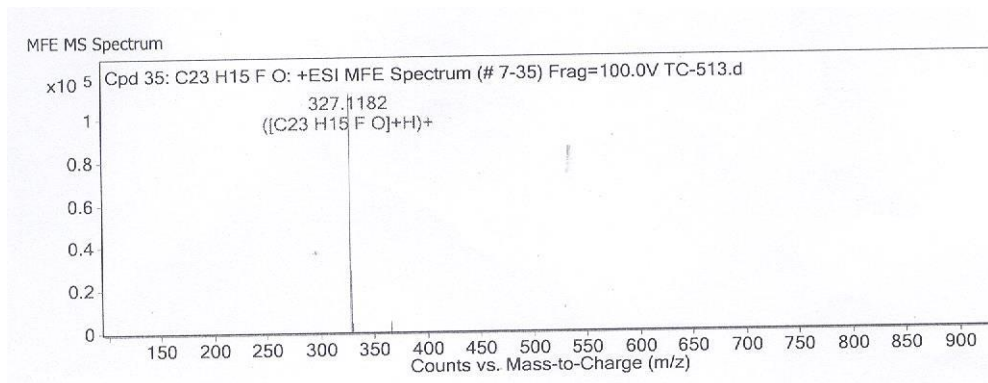

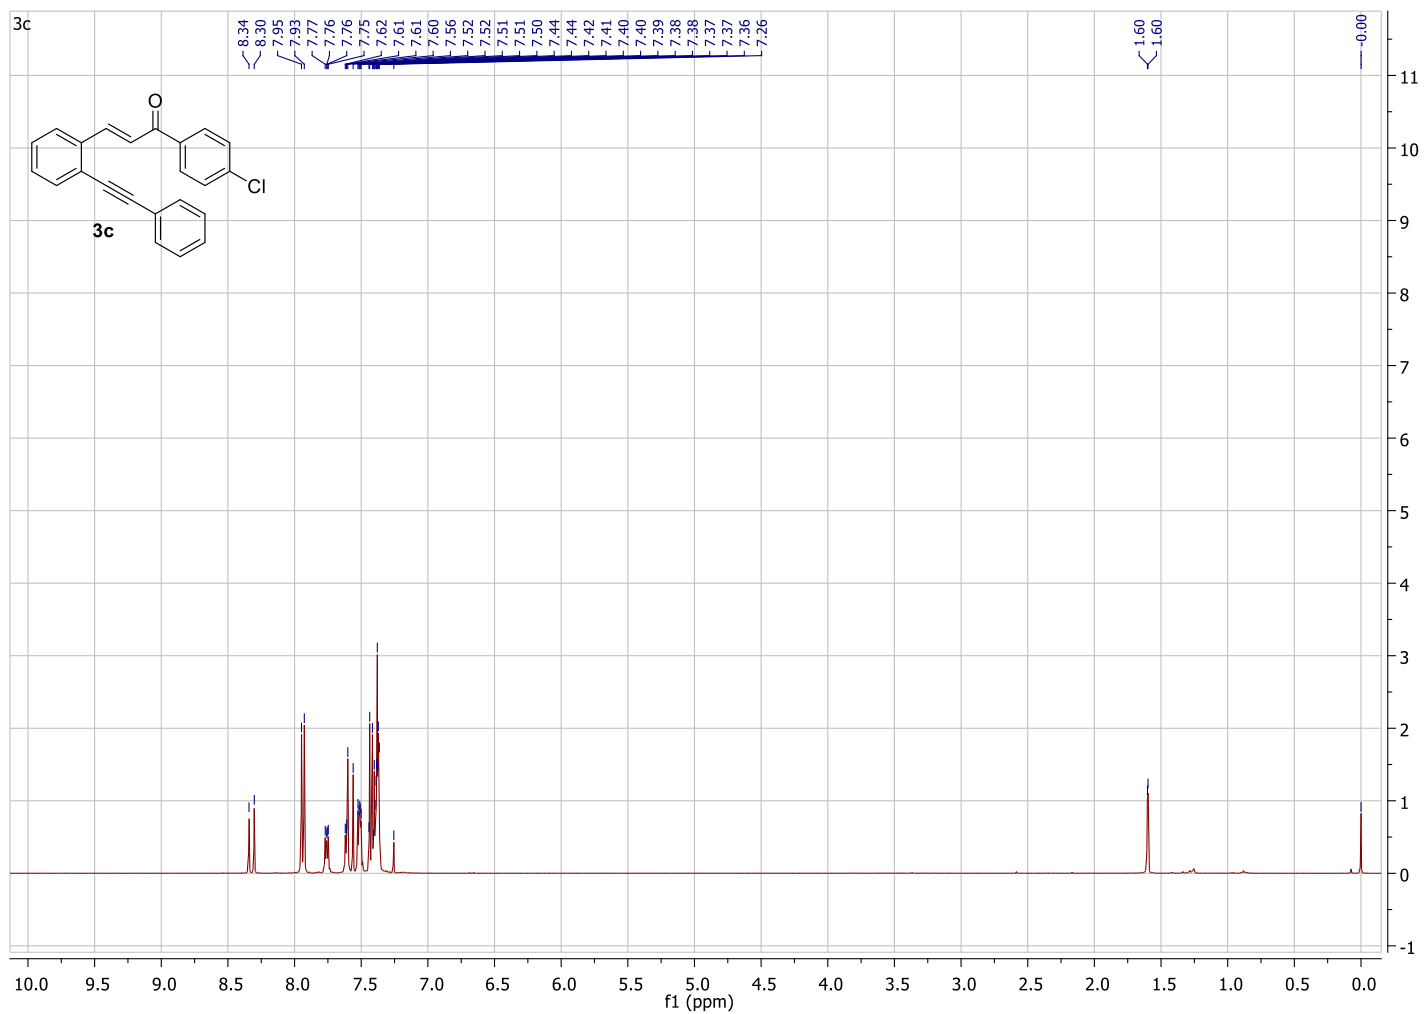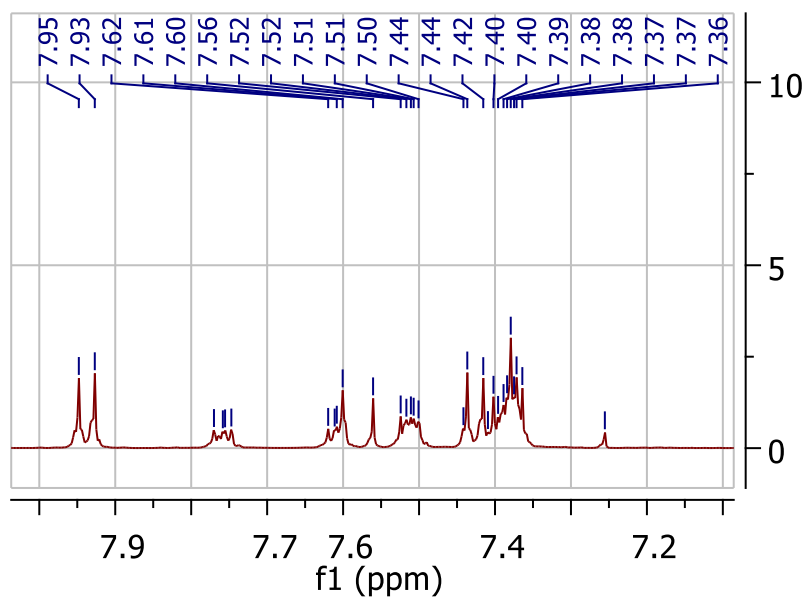

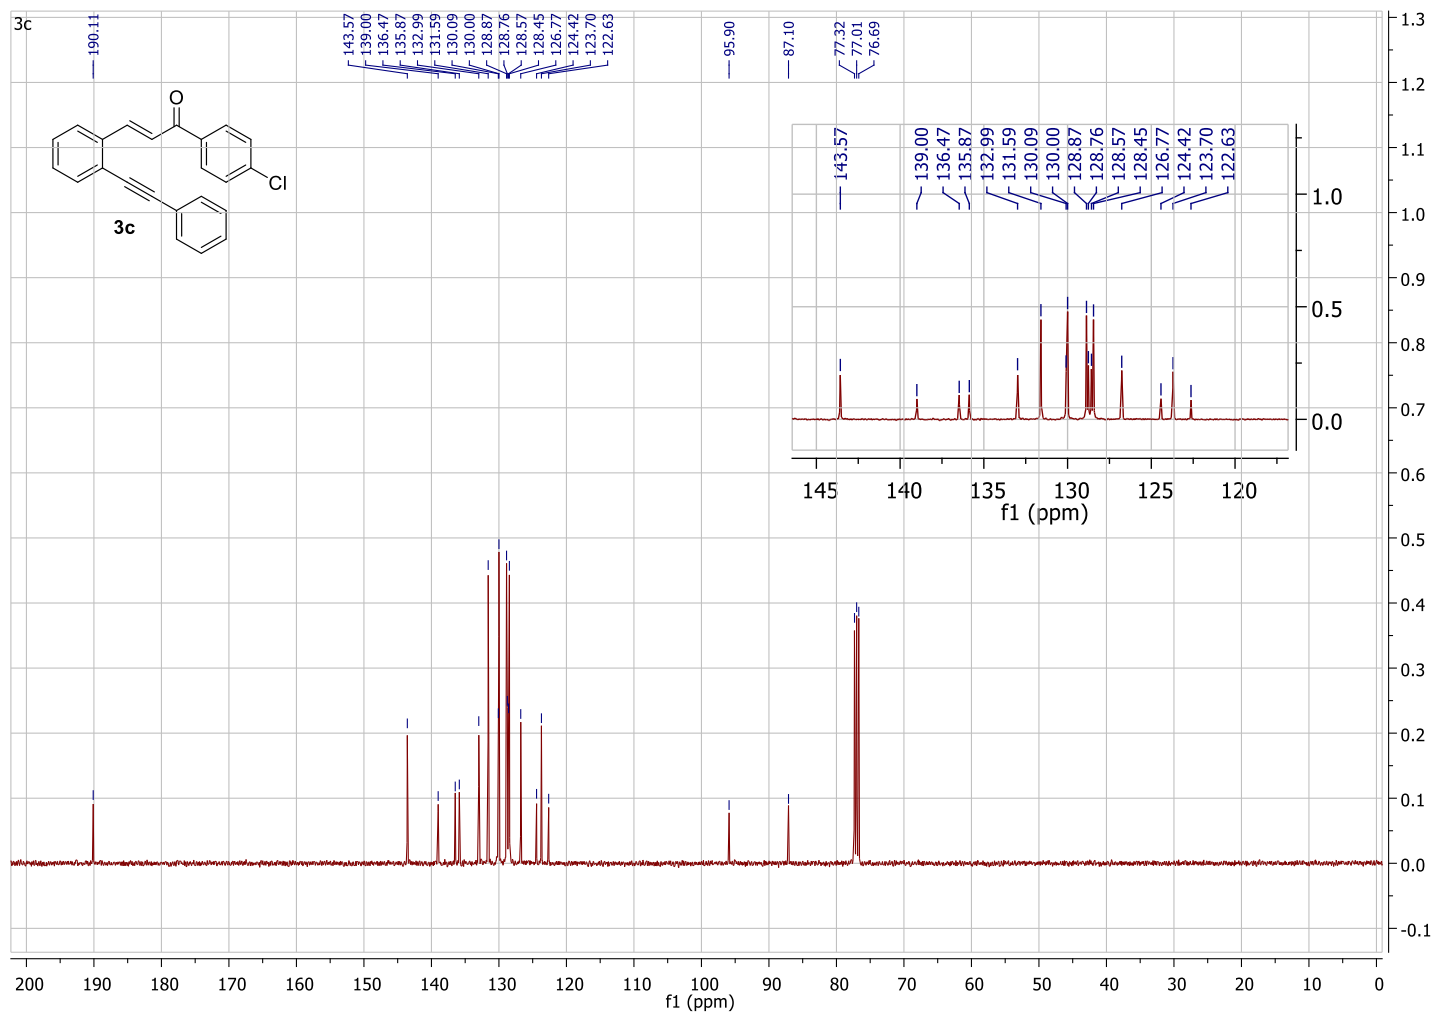

### HRMS: (3c)

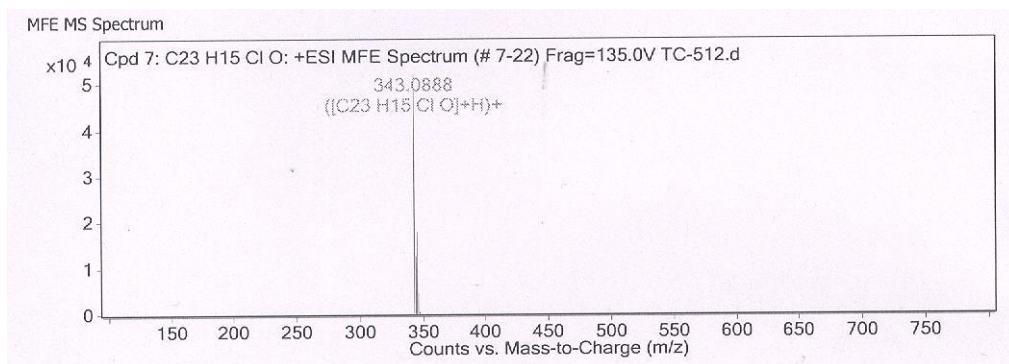

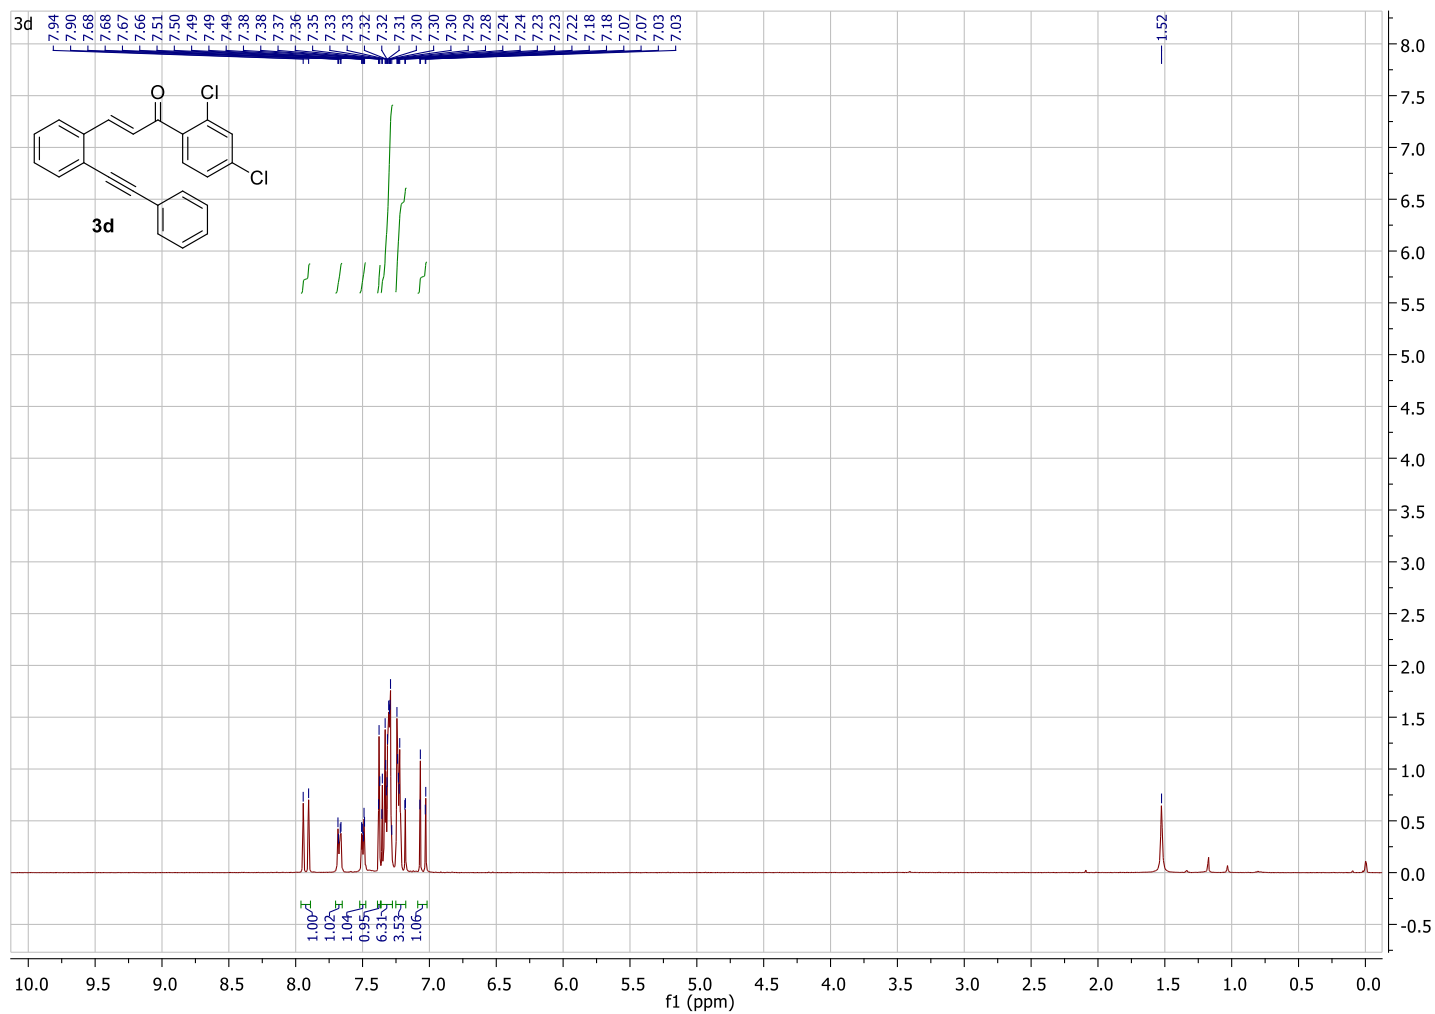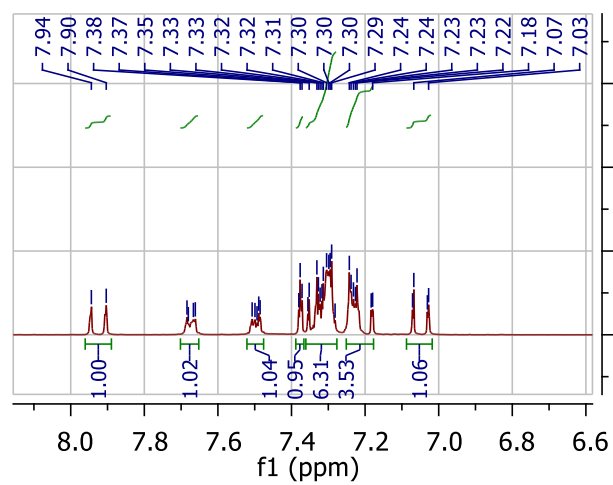

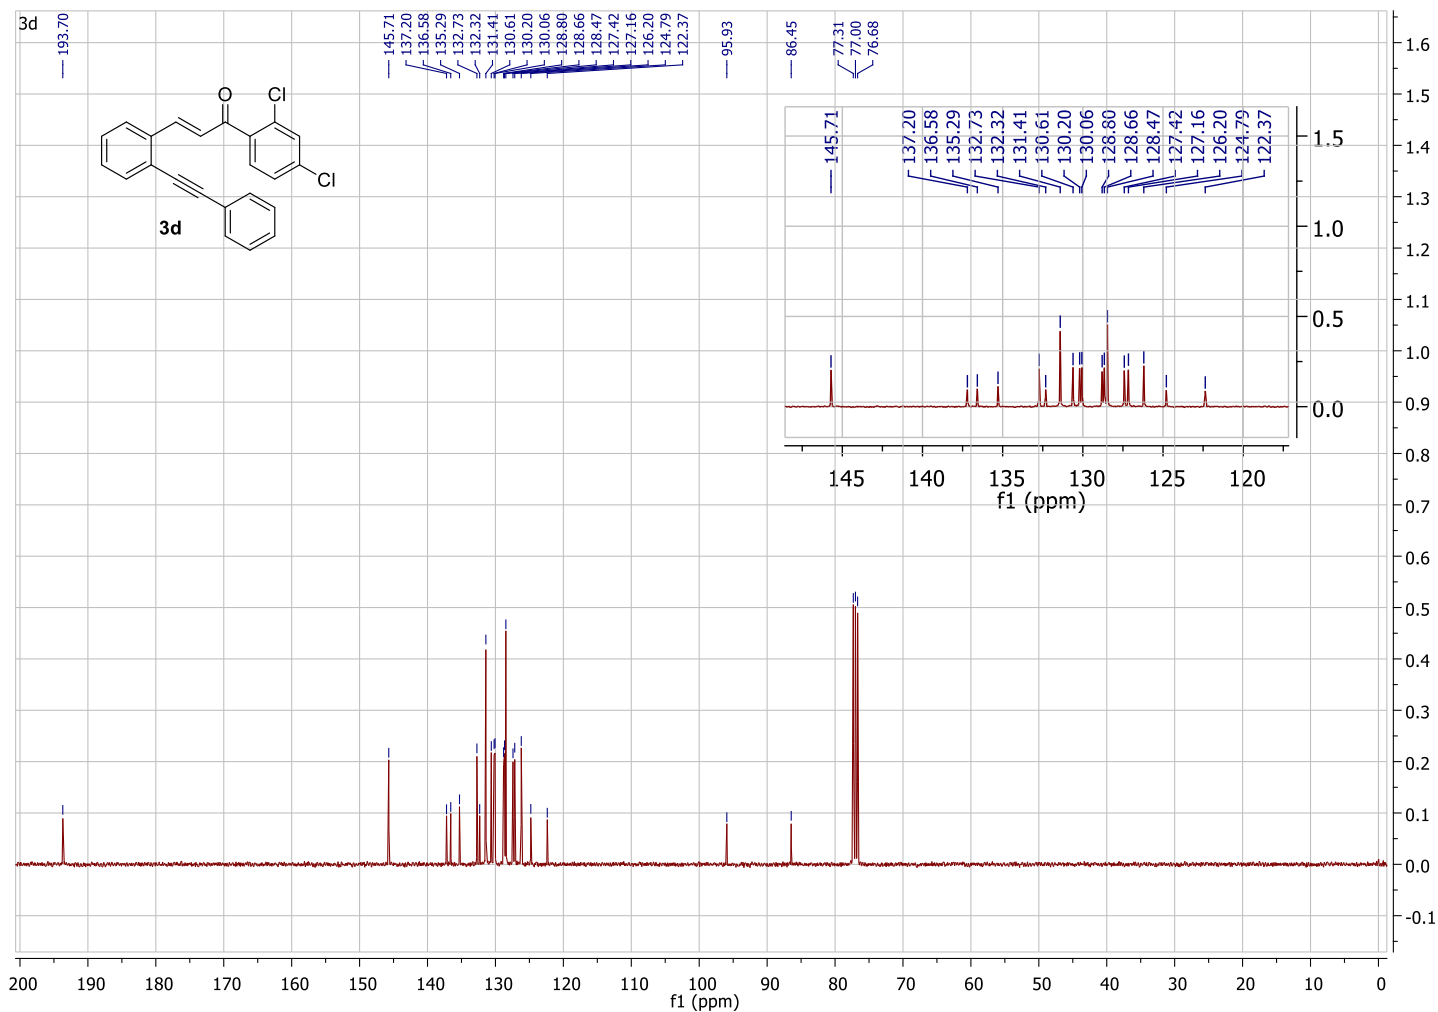

### HRMS: (3d):

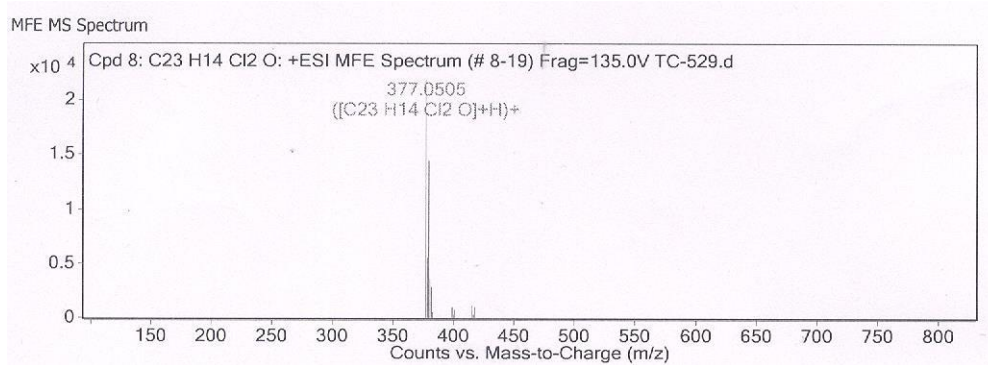

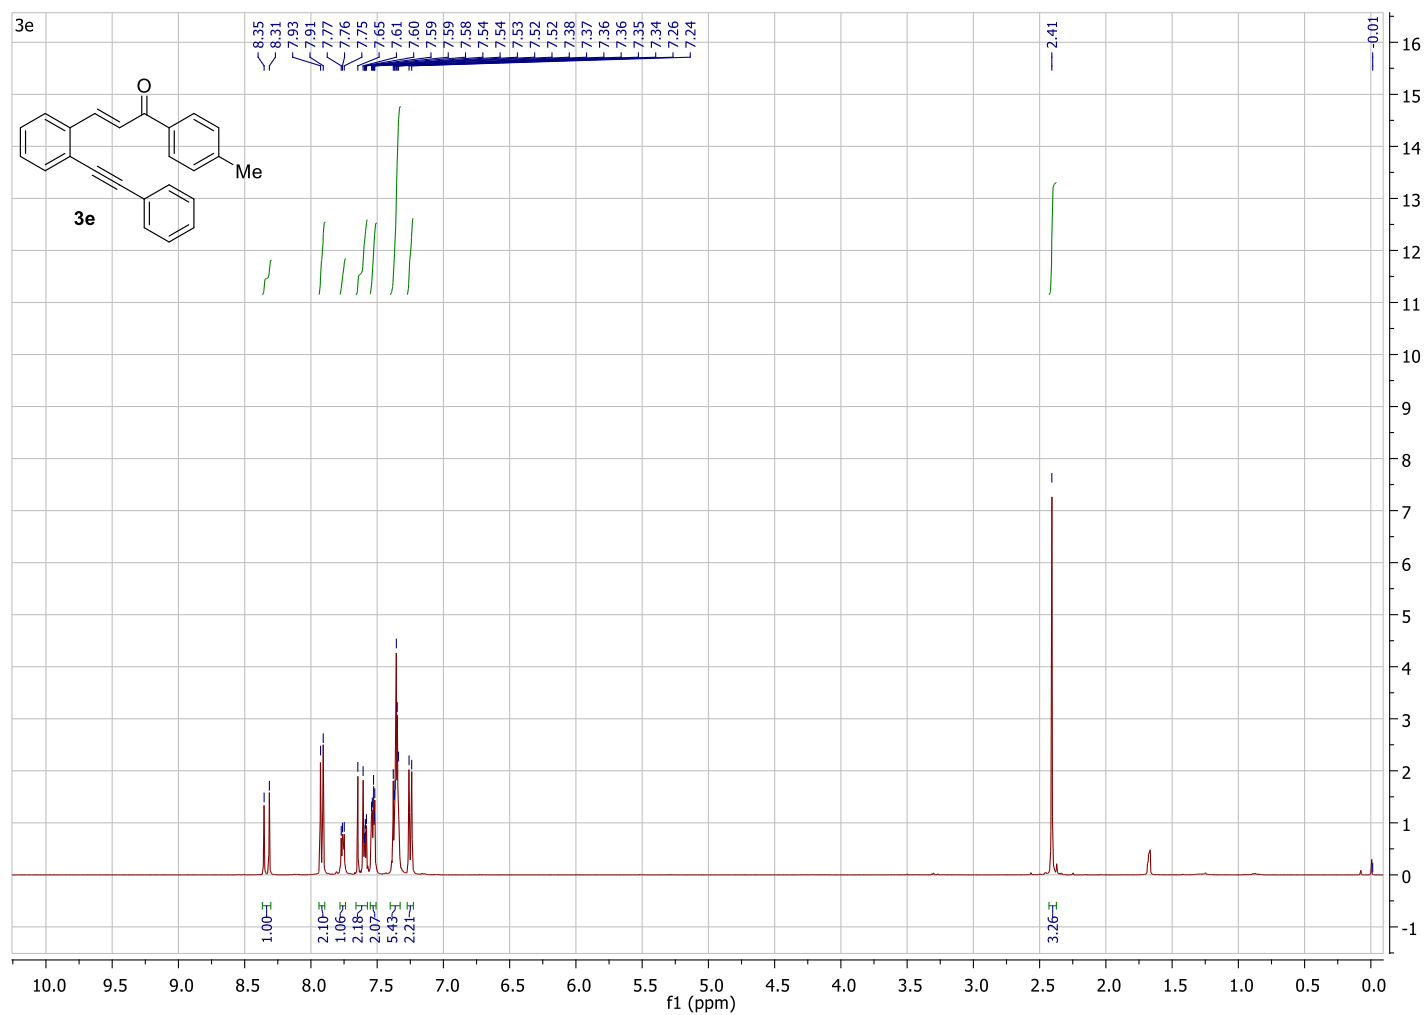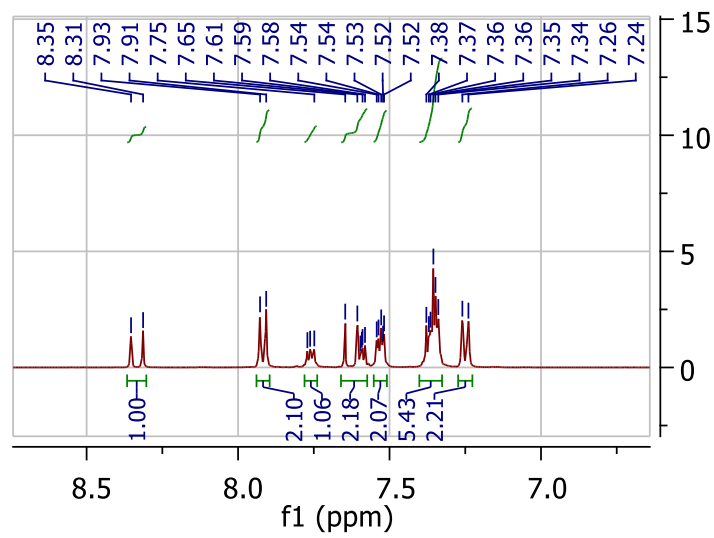

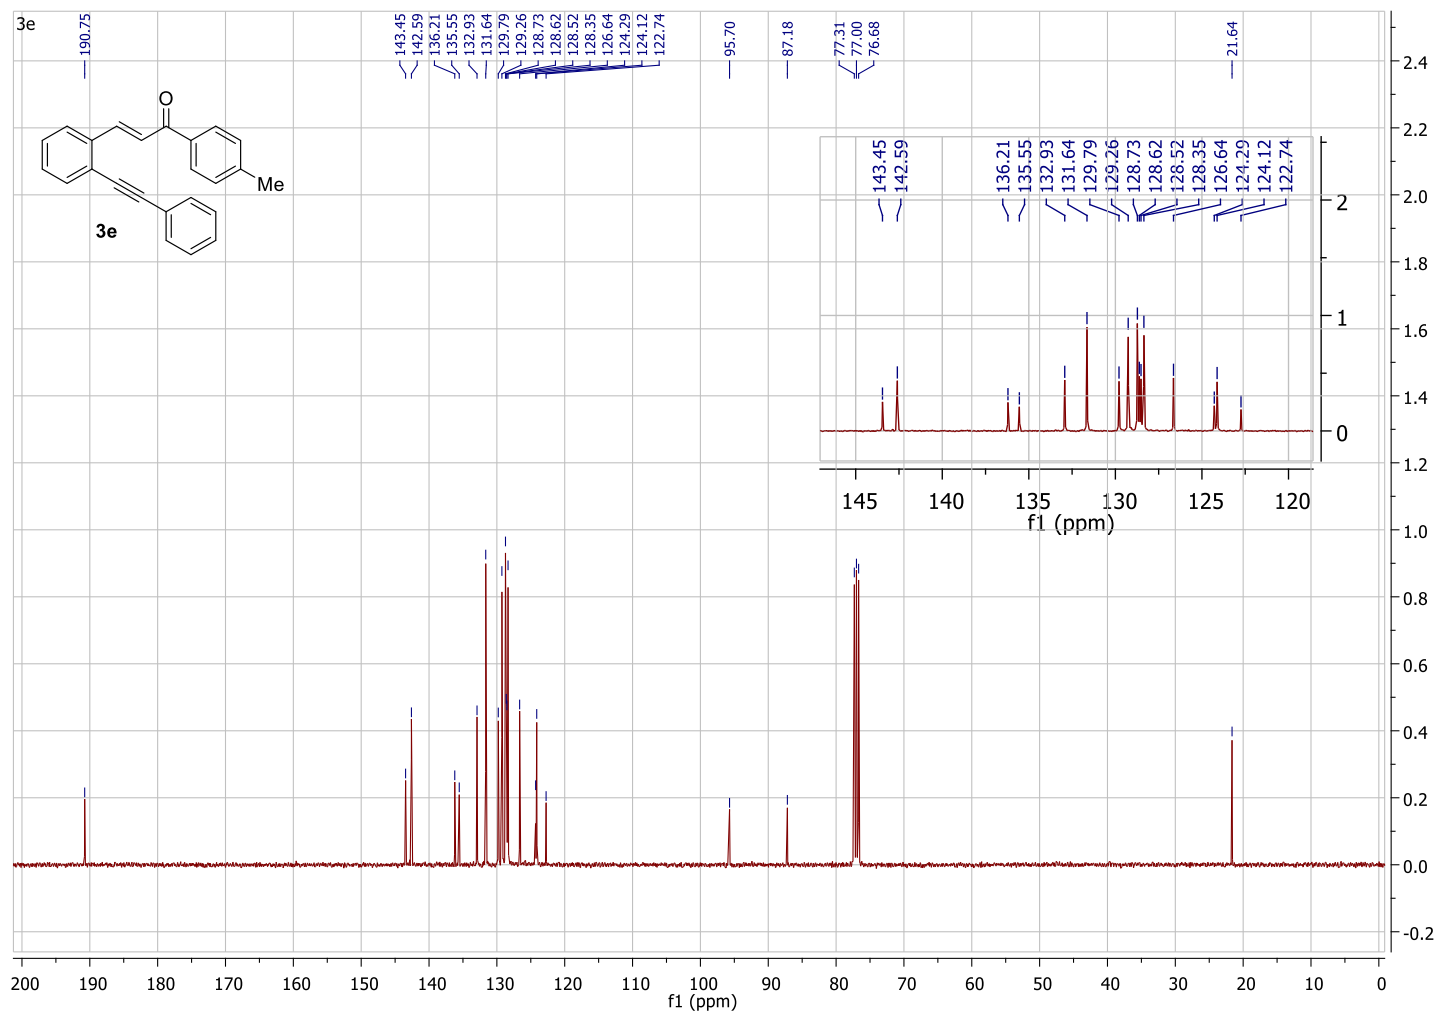

**HRMS: (3e)**

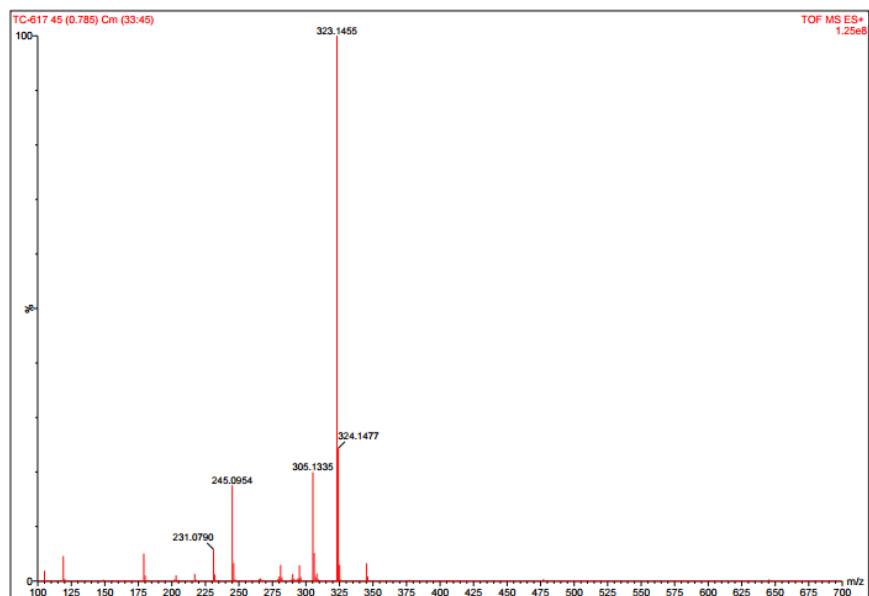

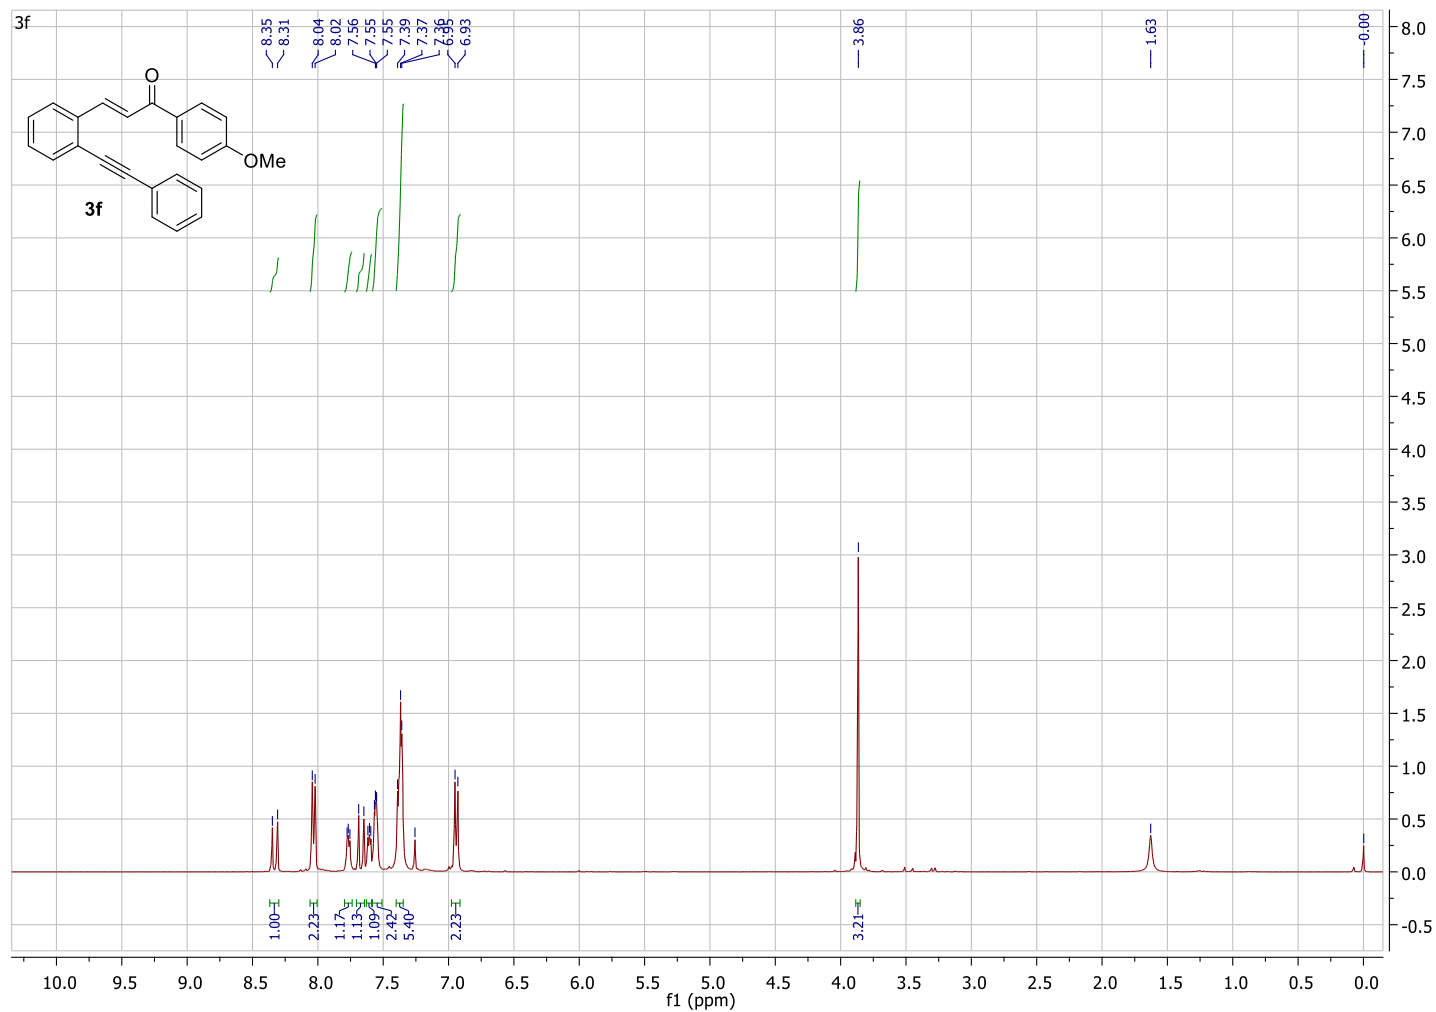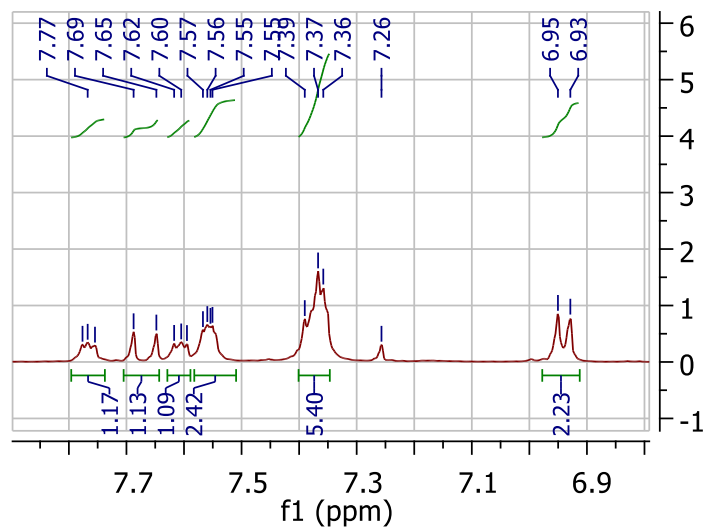



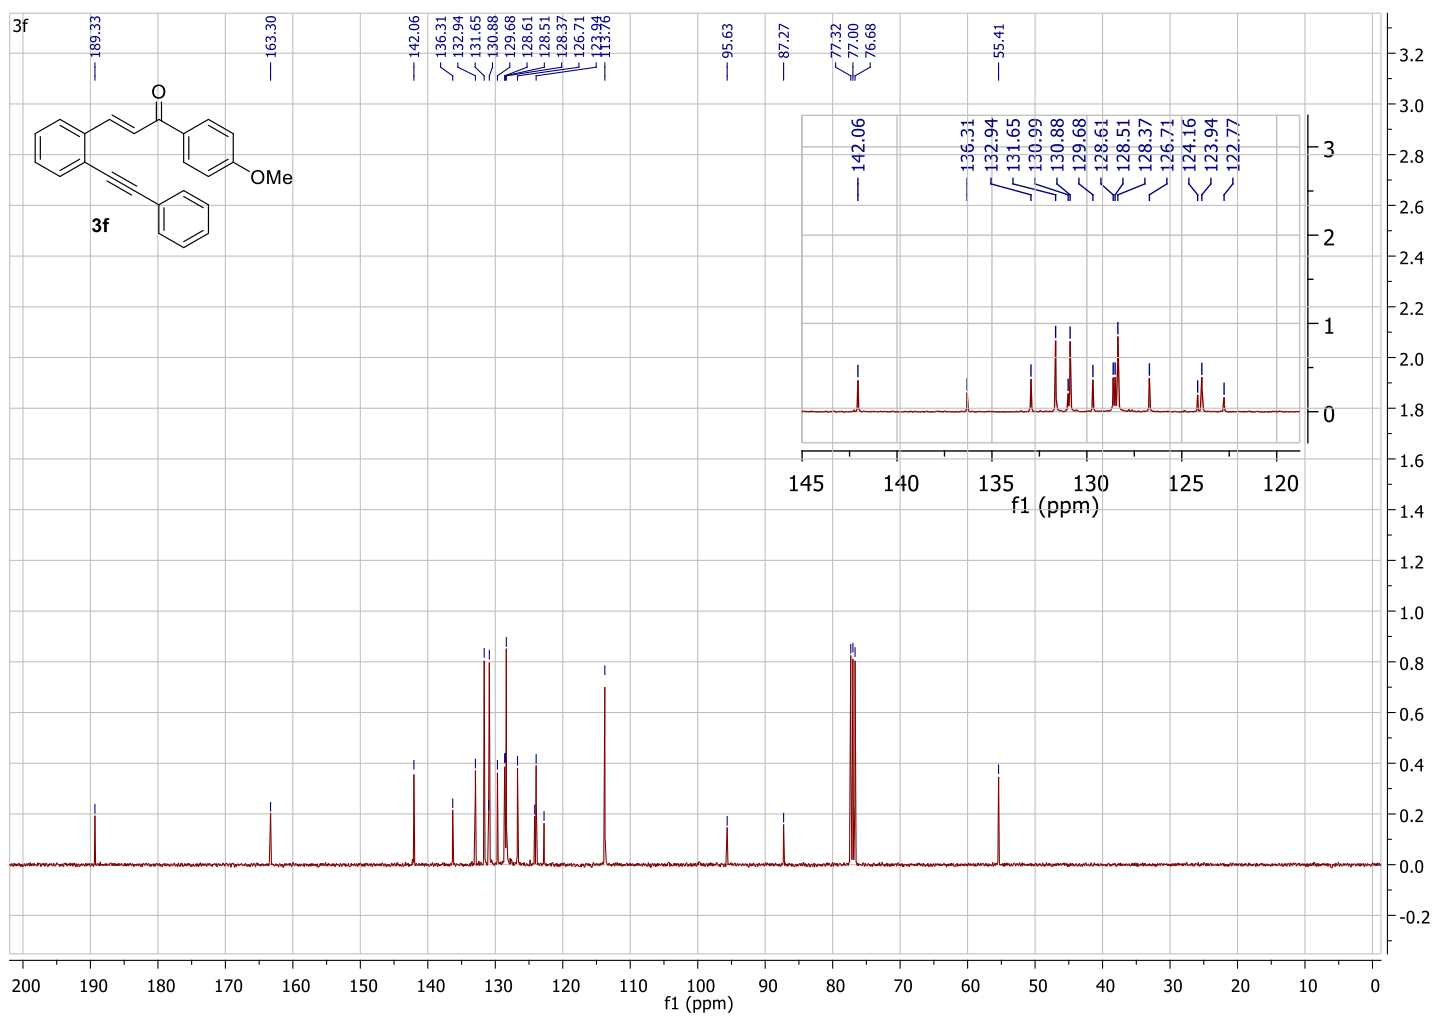

**HRMS: (3f)**

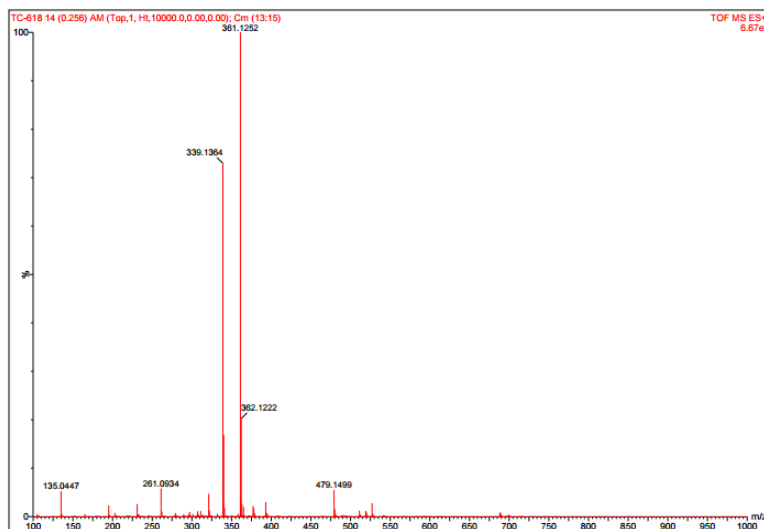

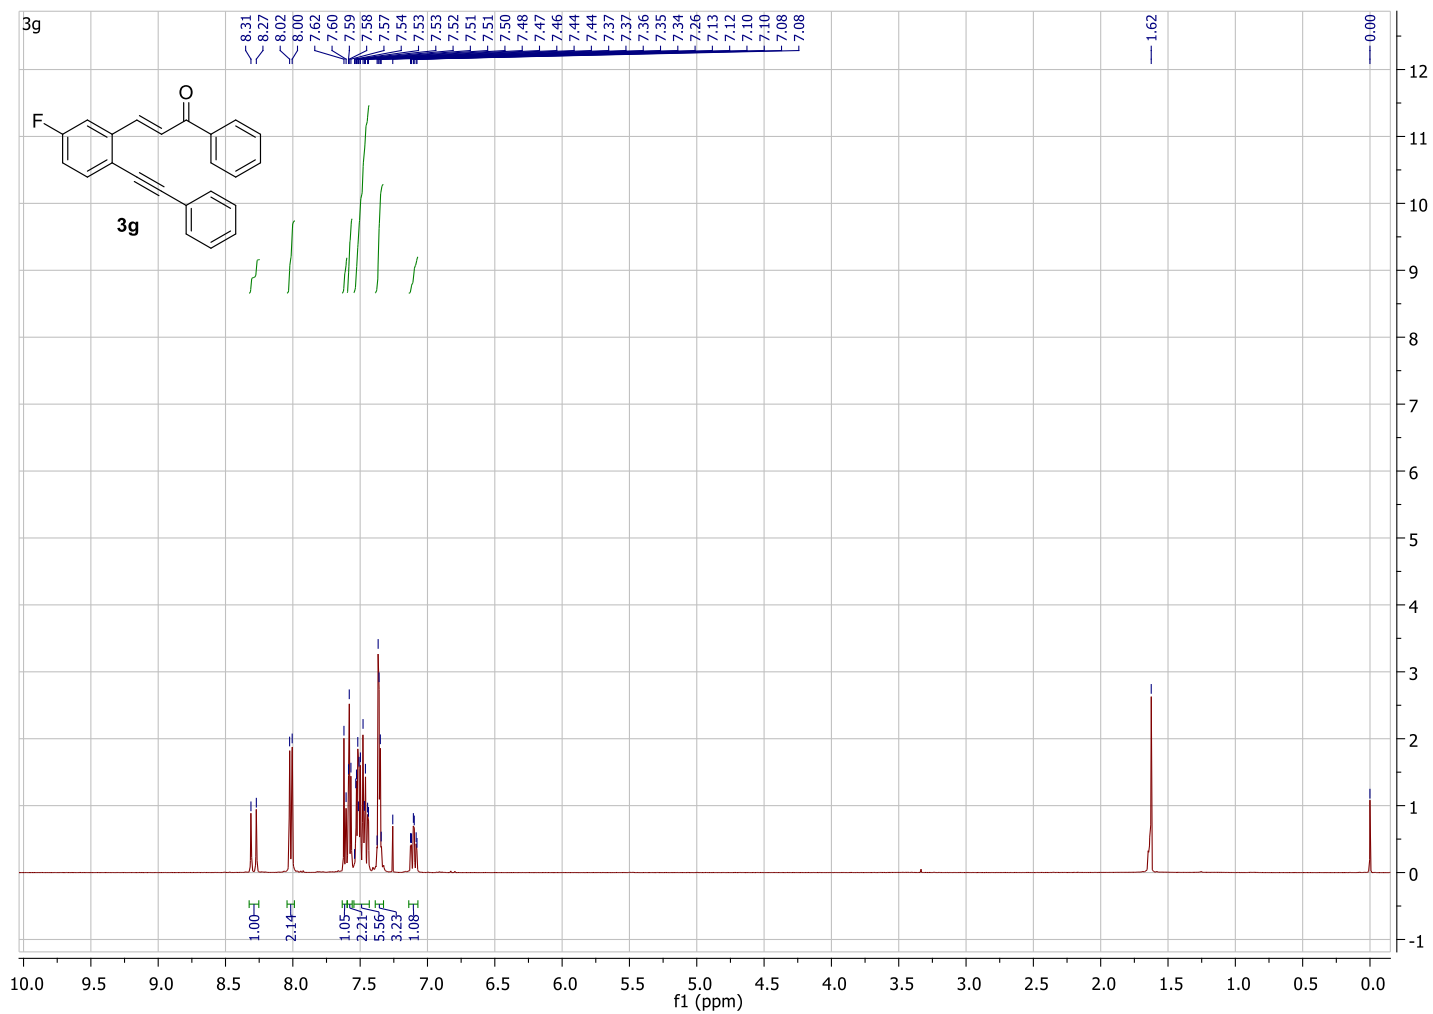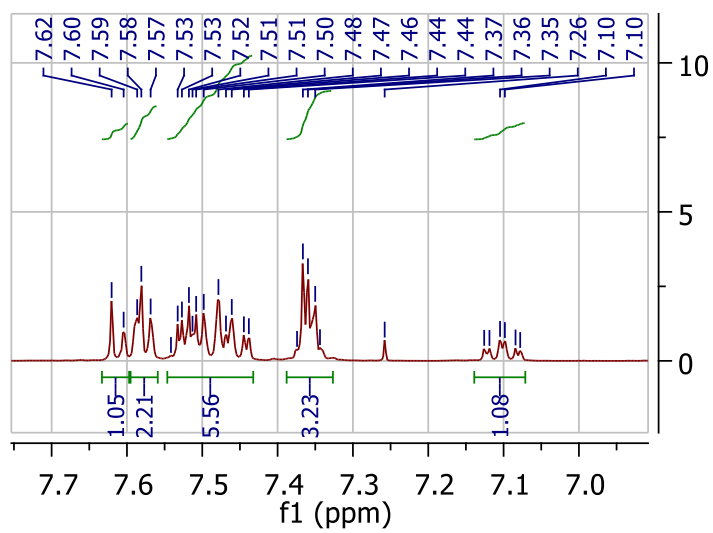

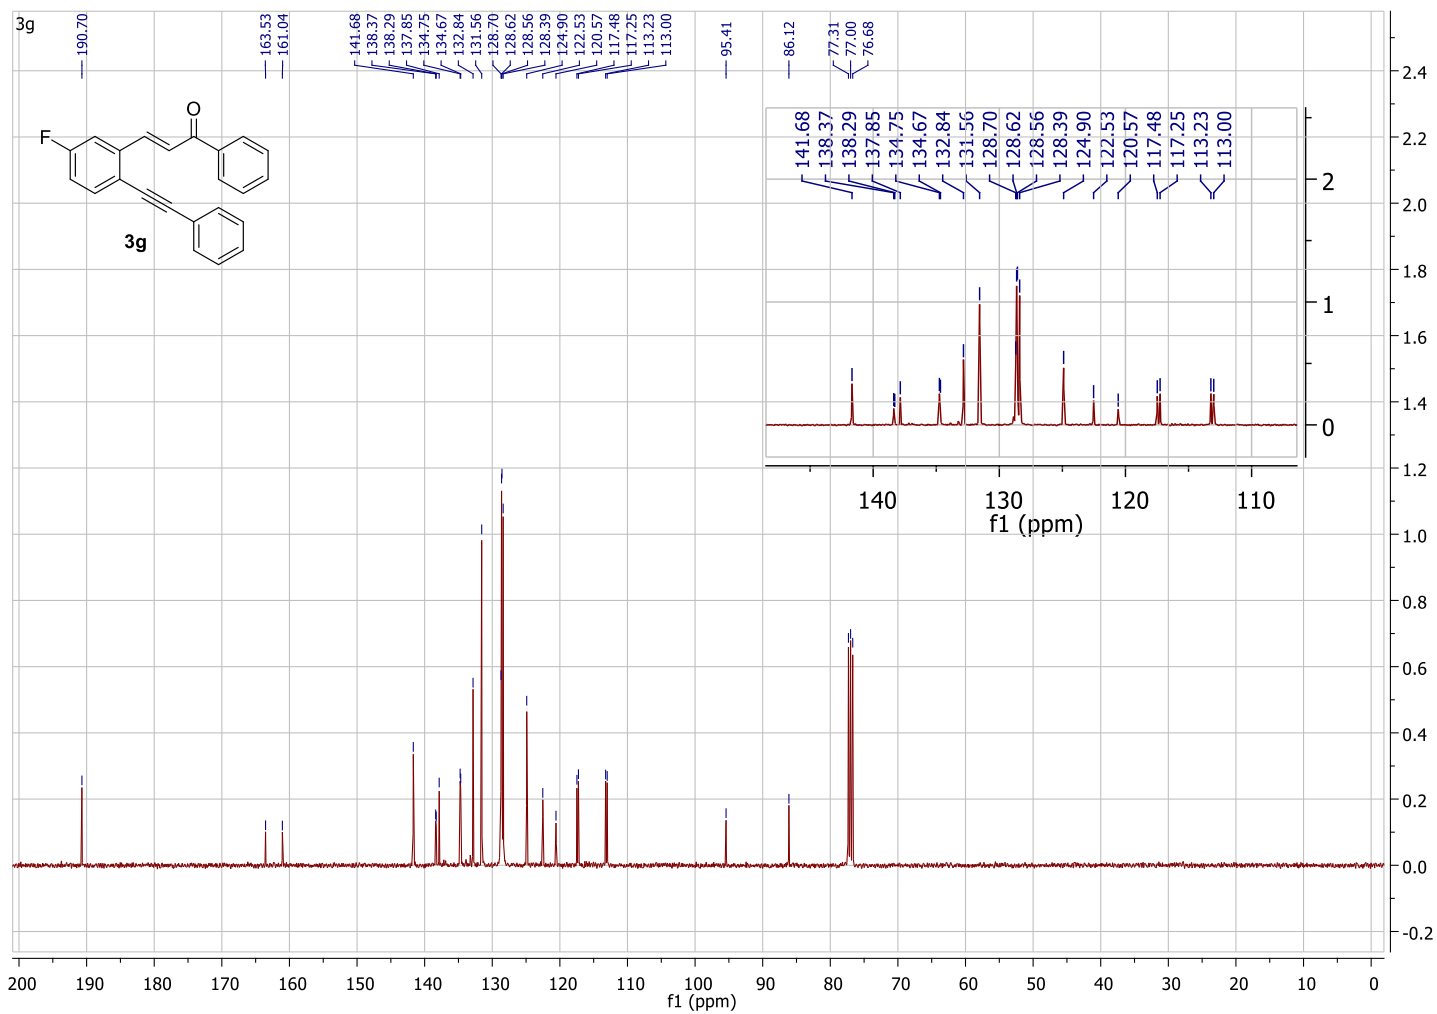

### HRMS: (3g)

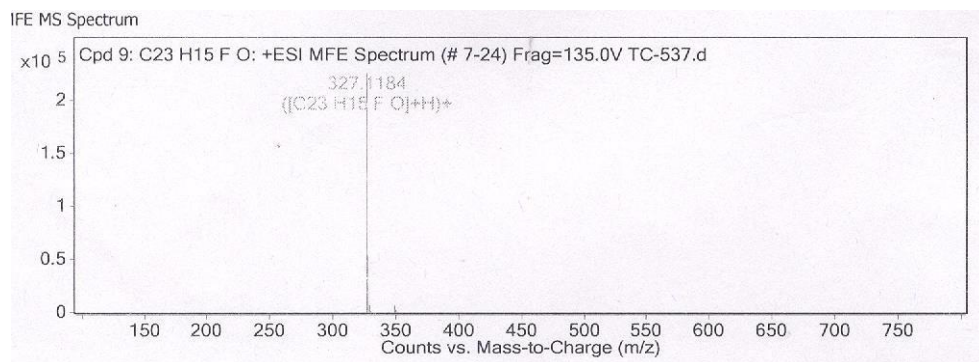

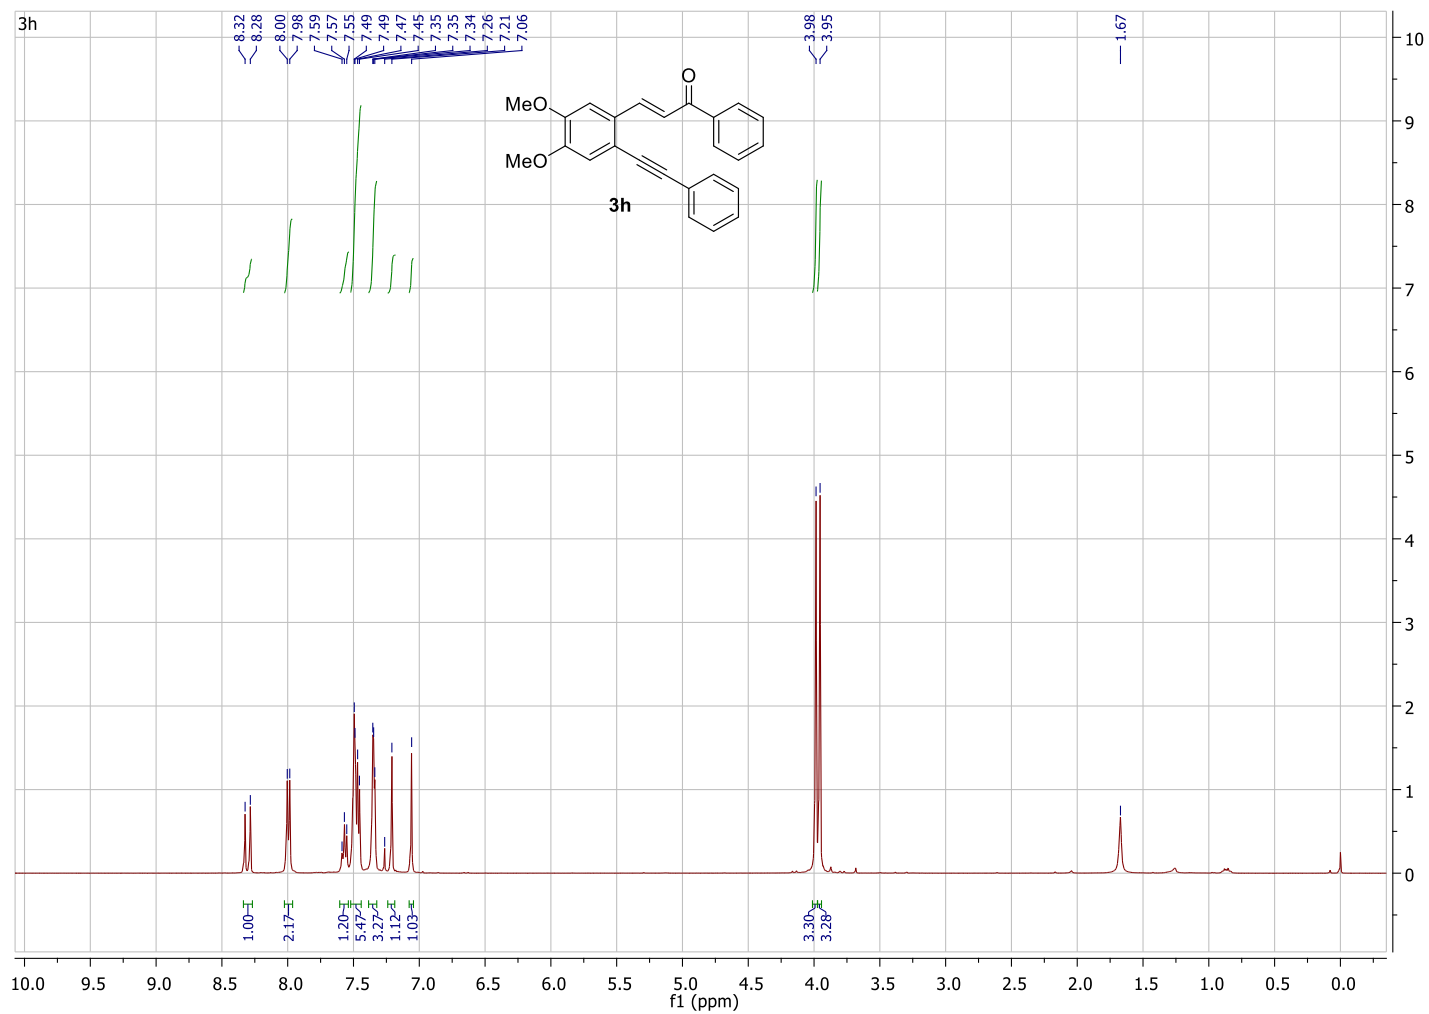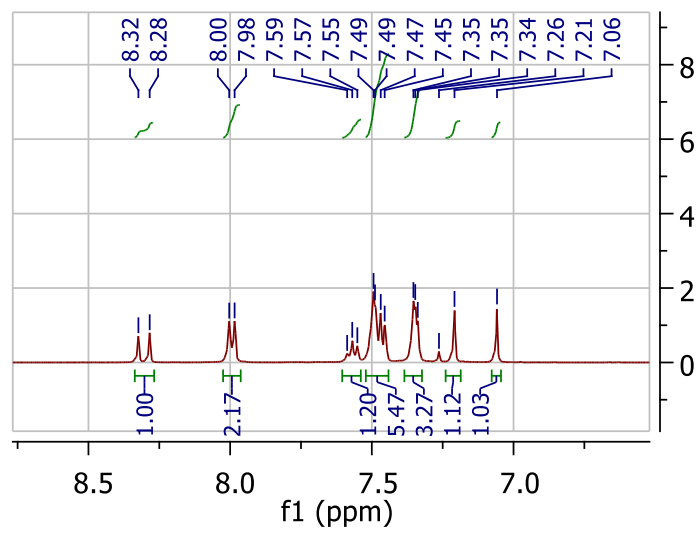

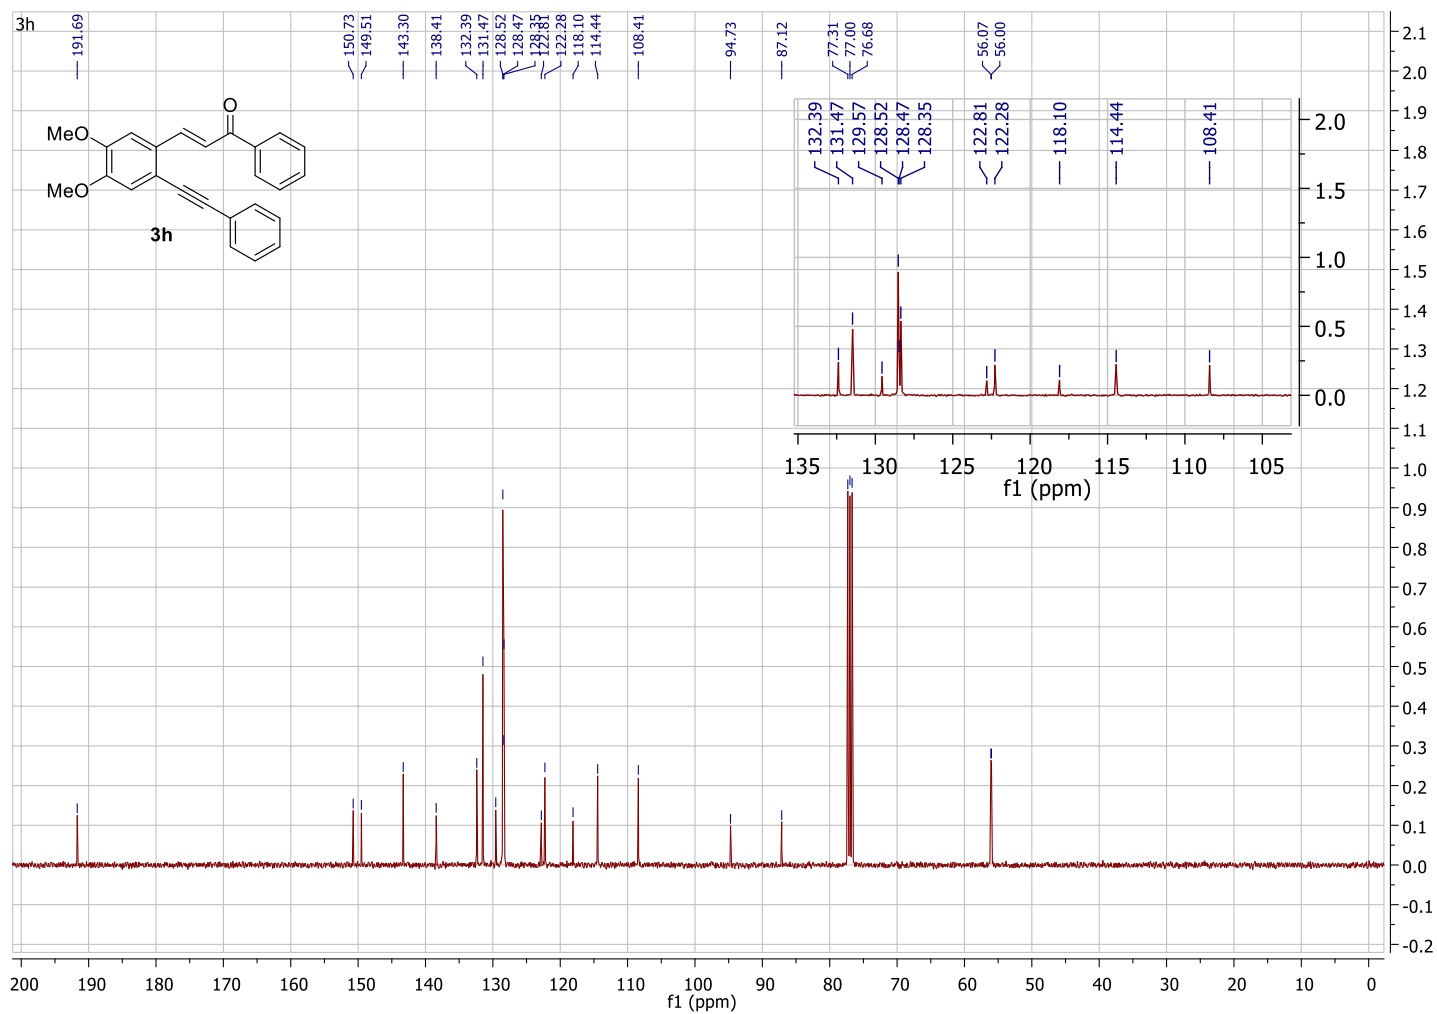

### HRMS: (3h)

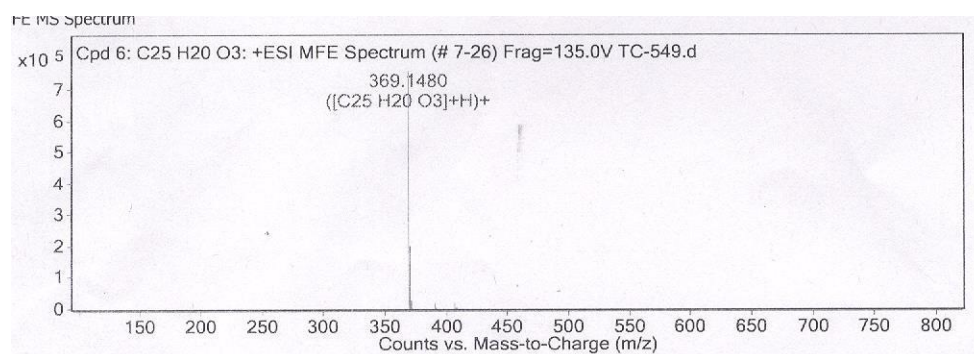

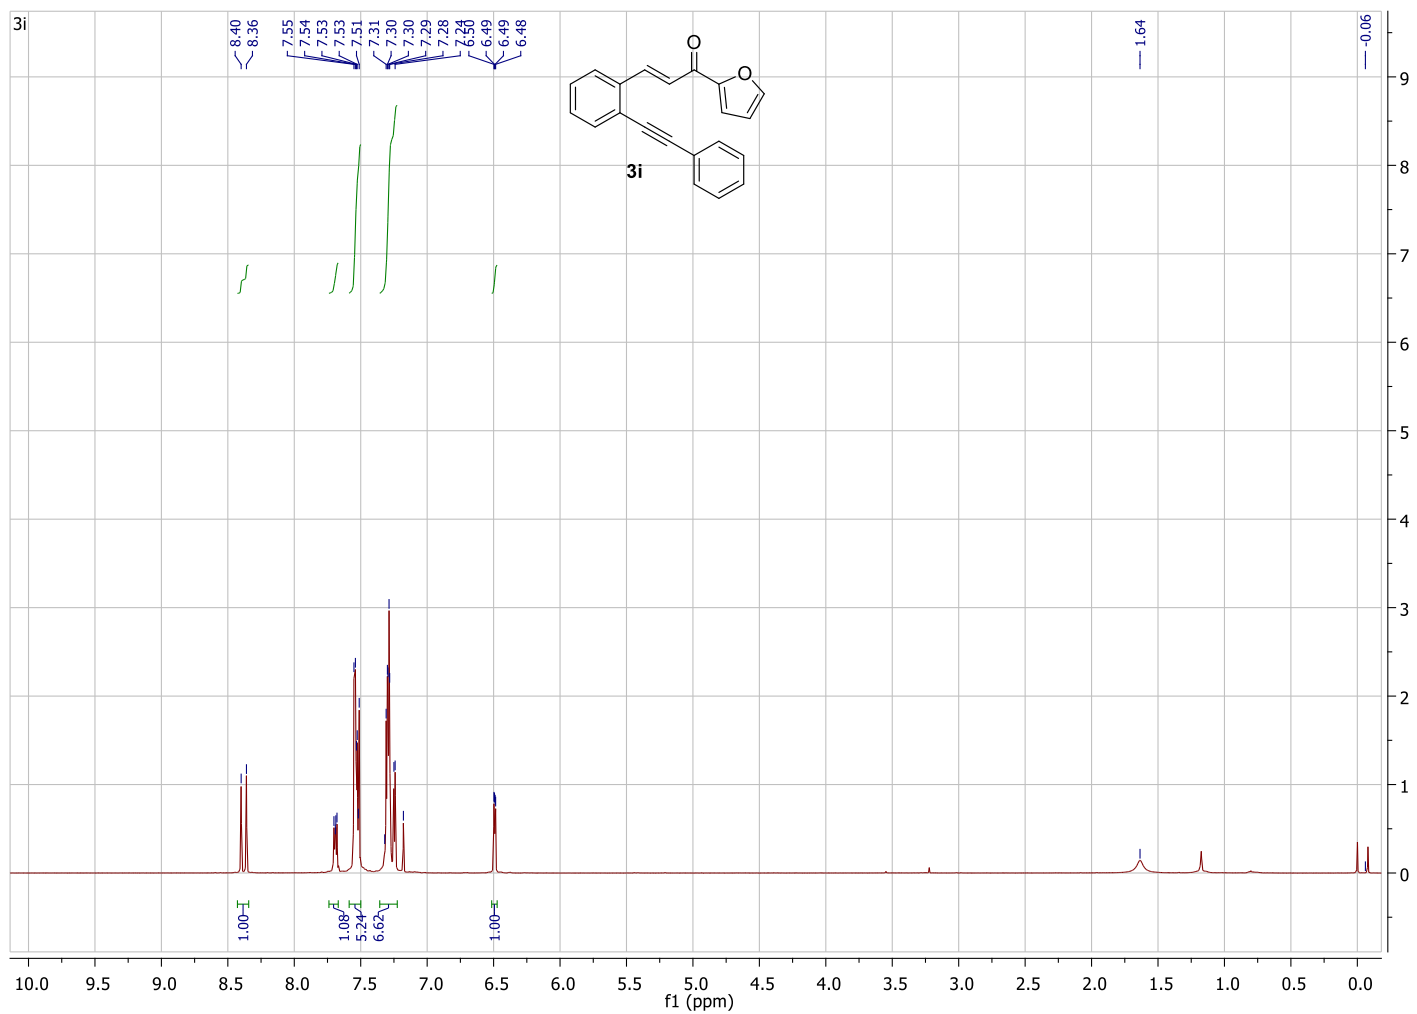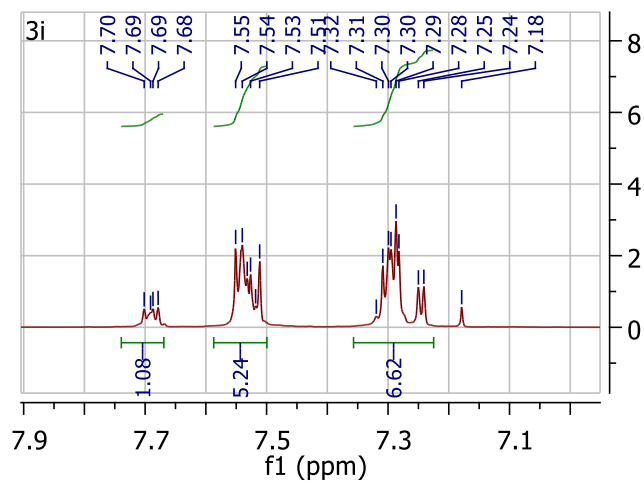

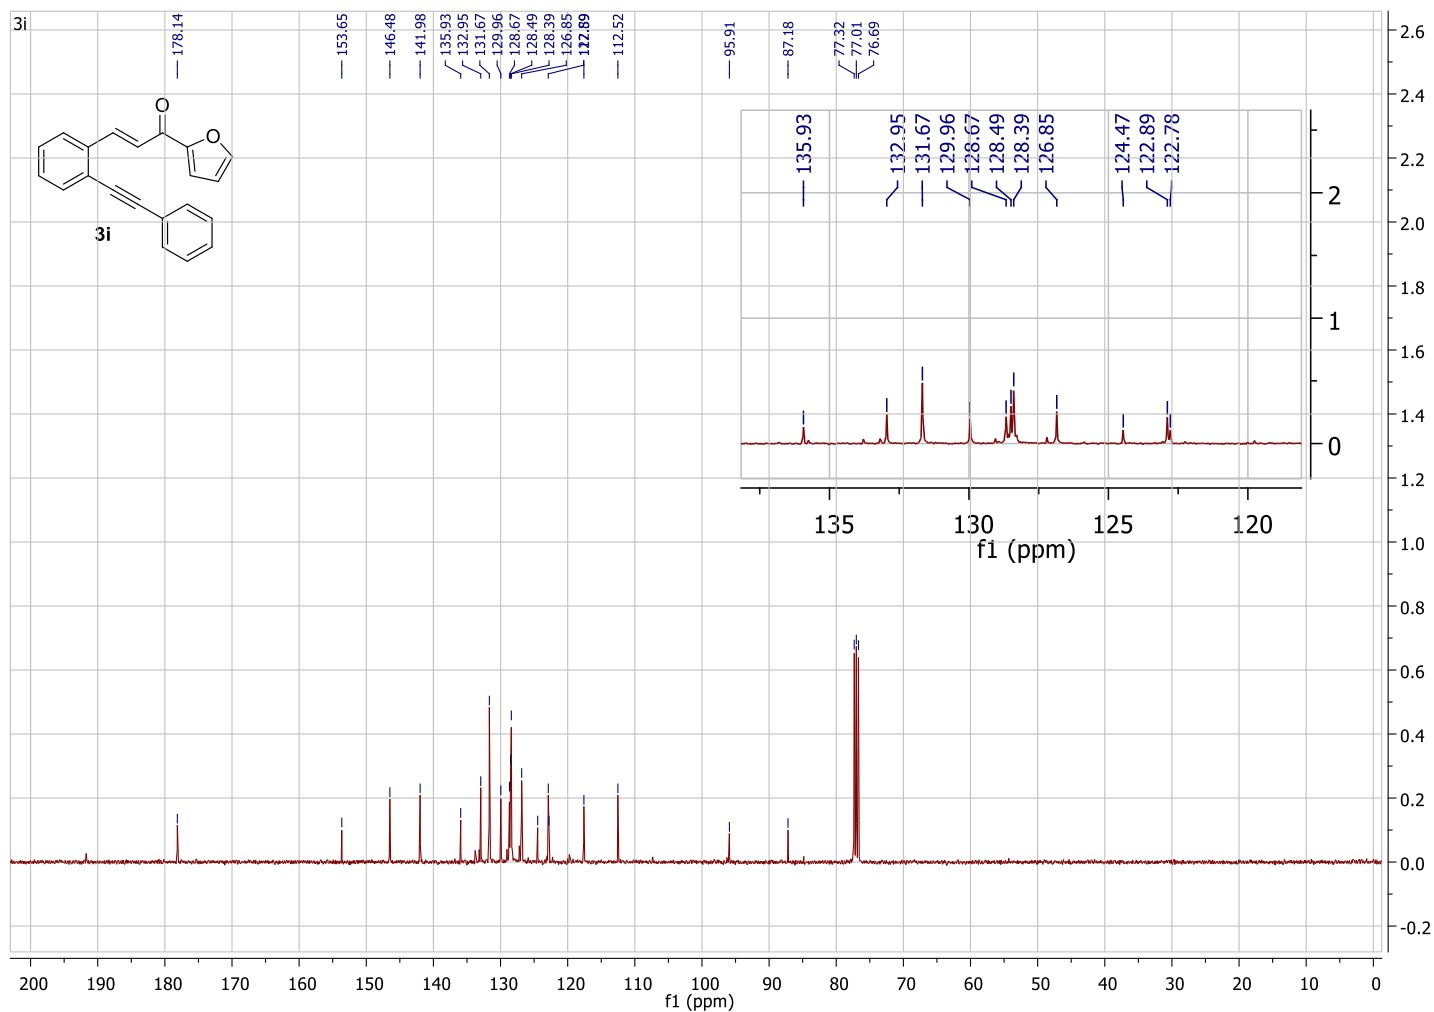

### HRMS: (3i)

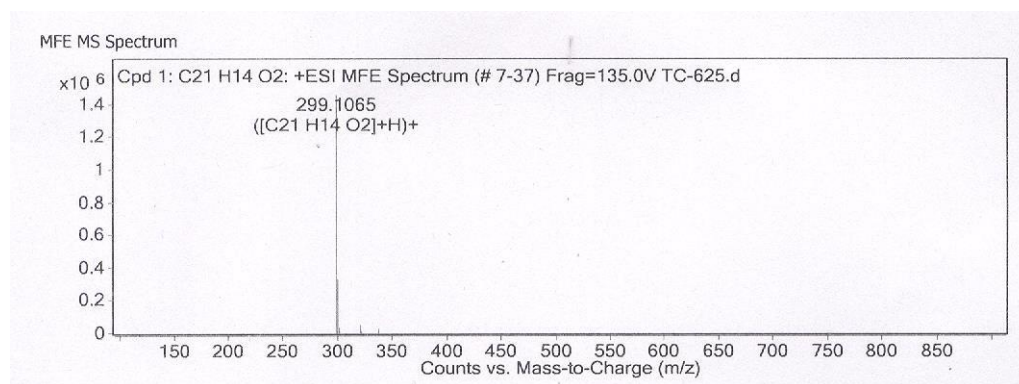

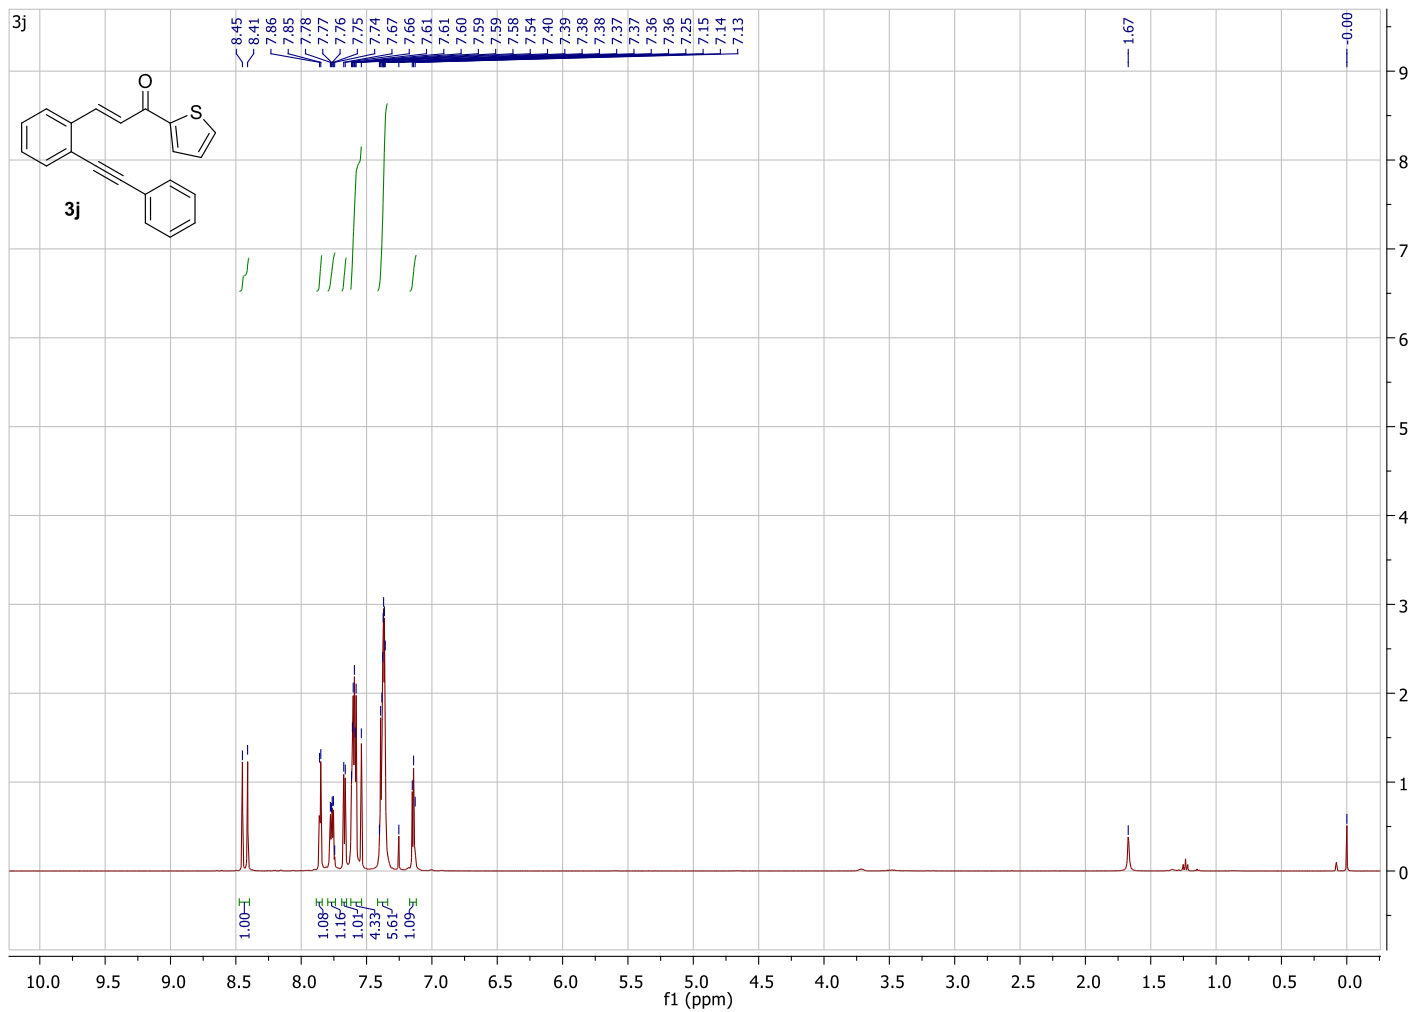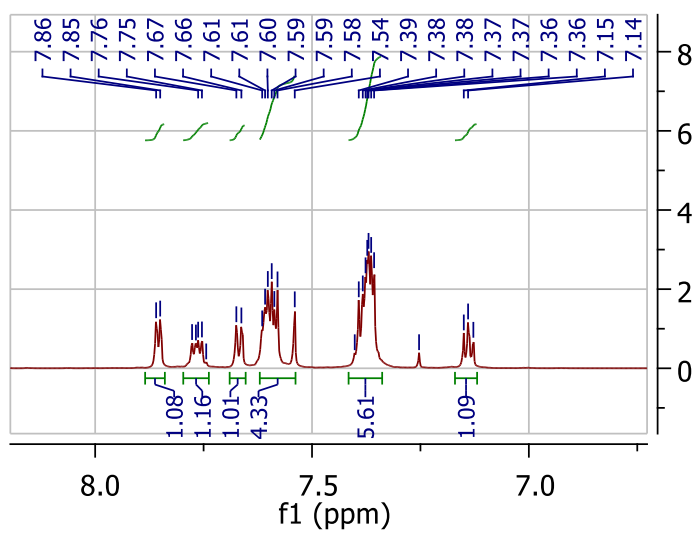



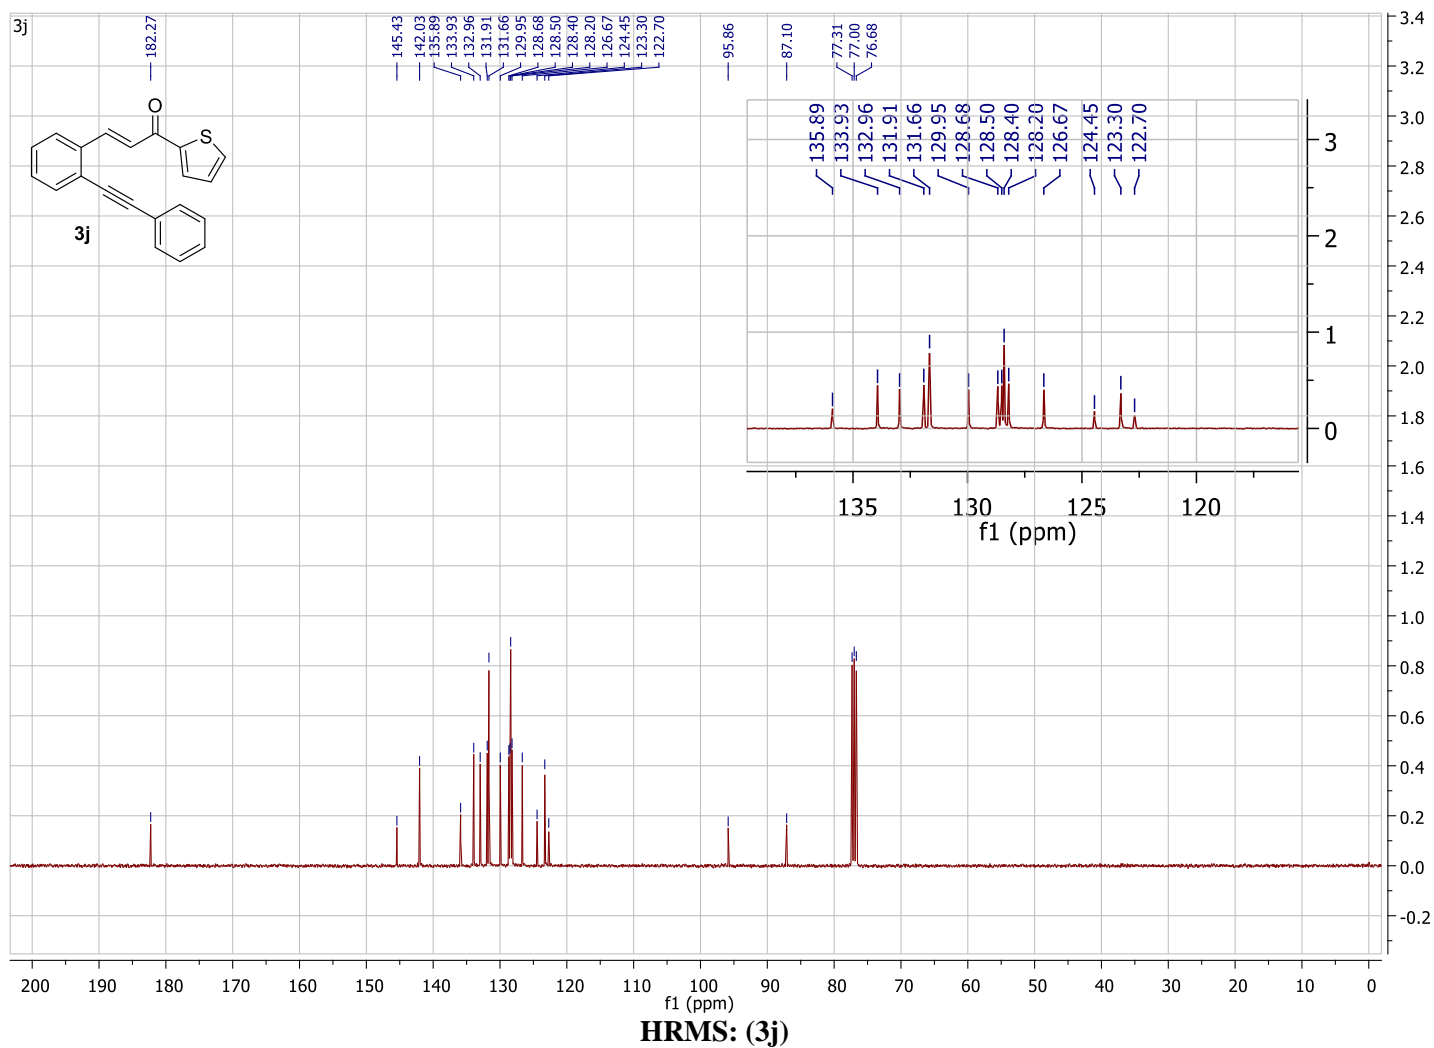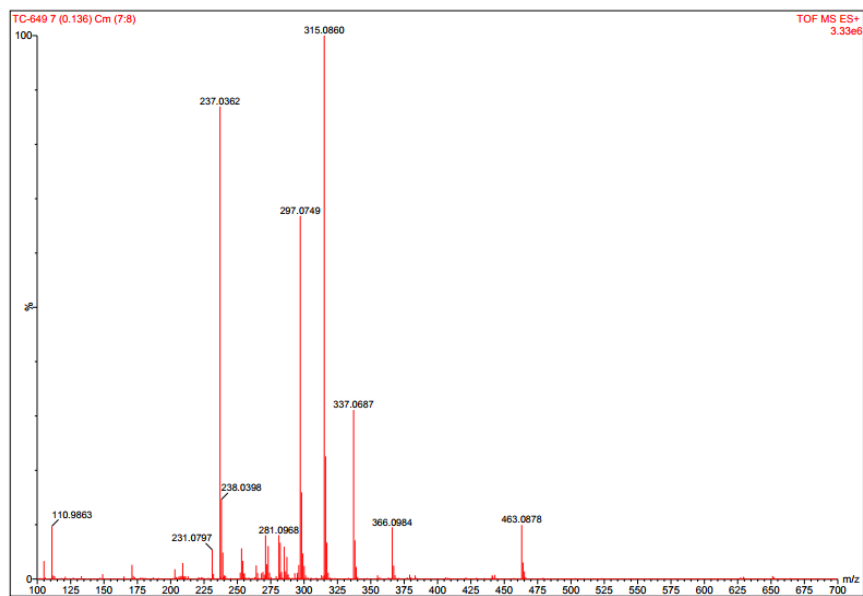

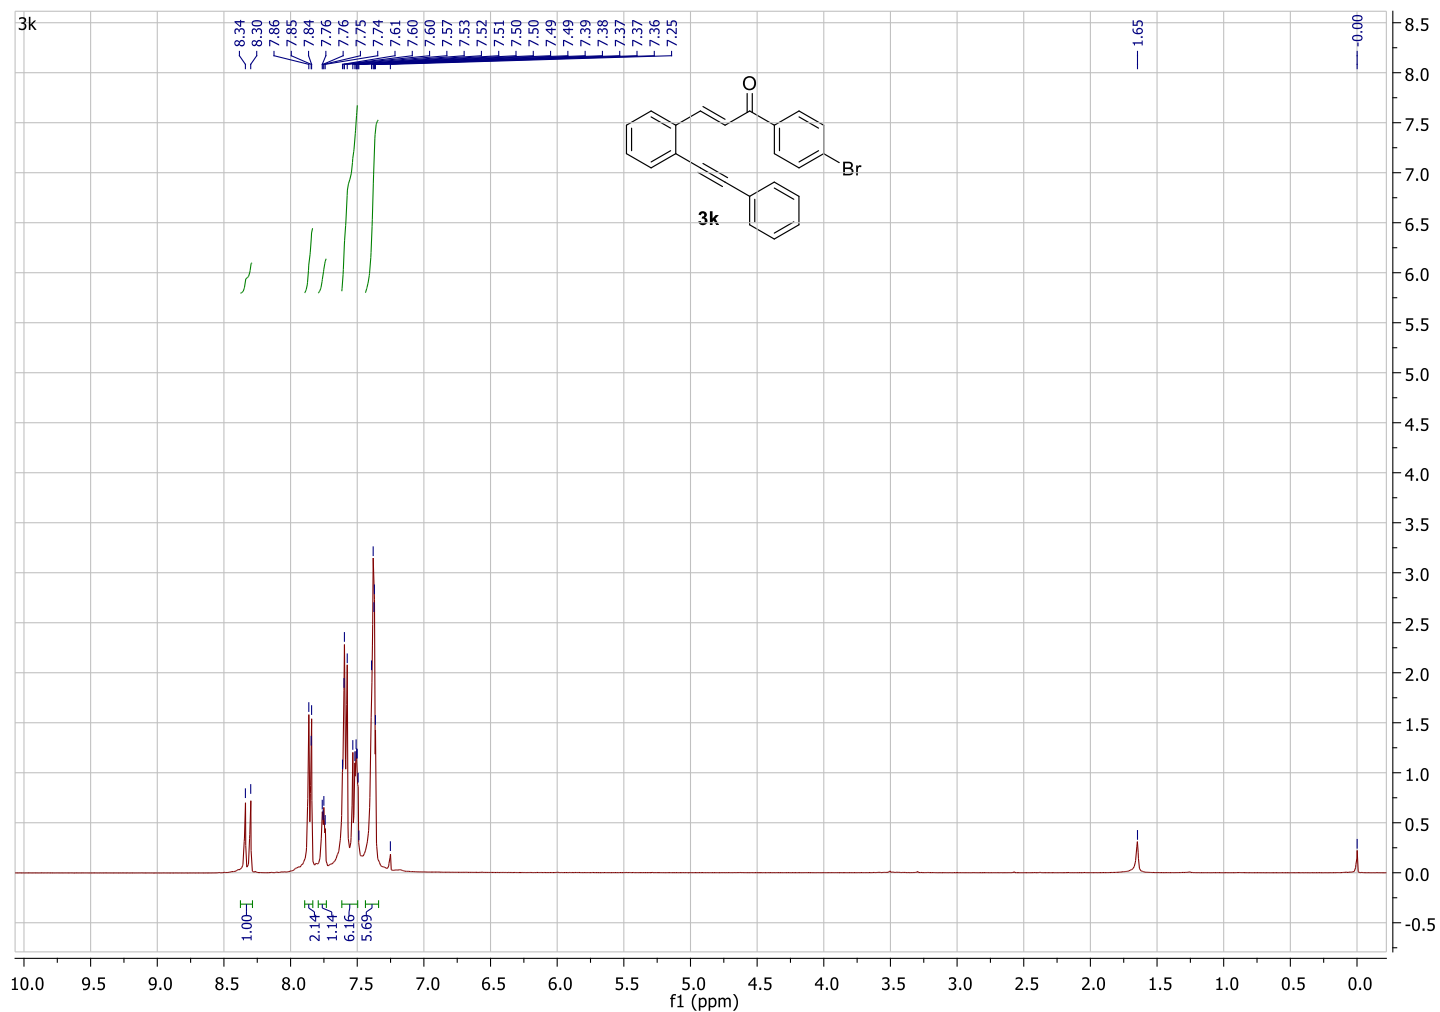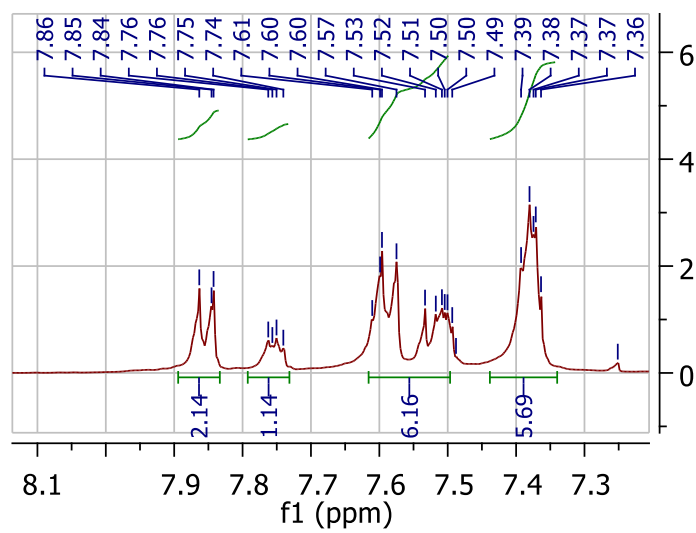

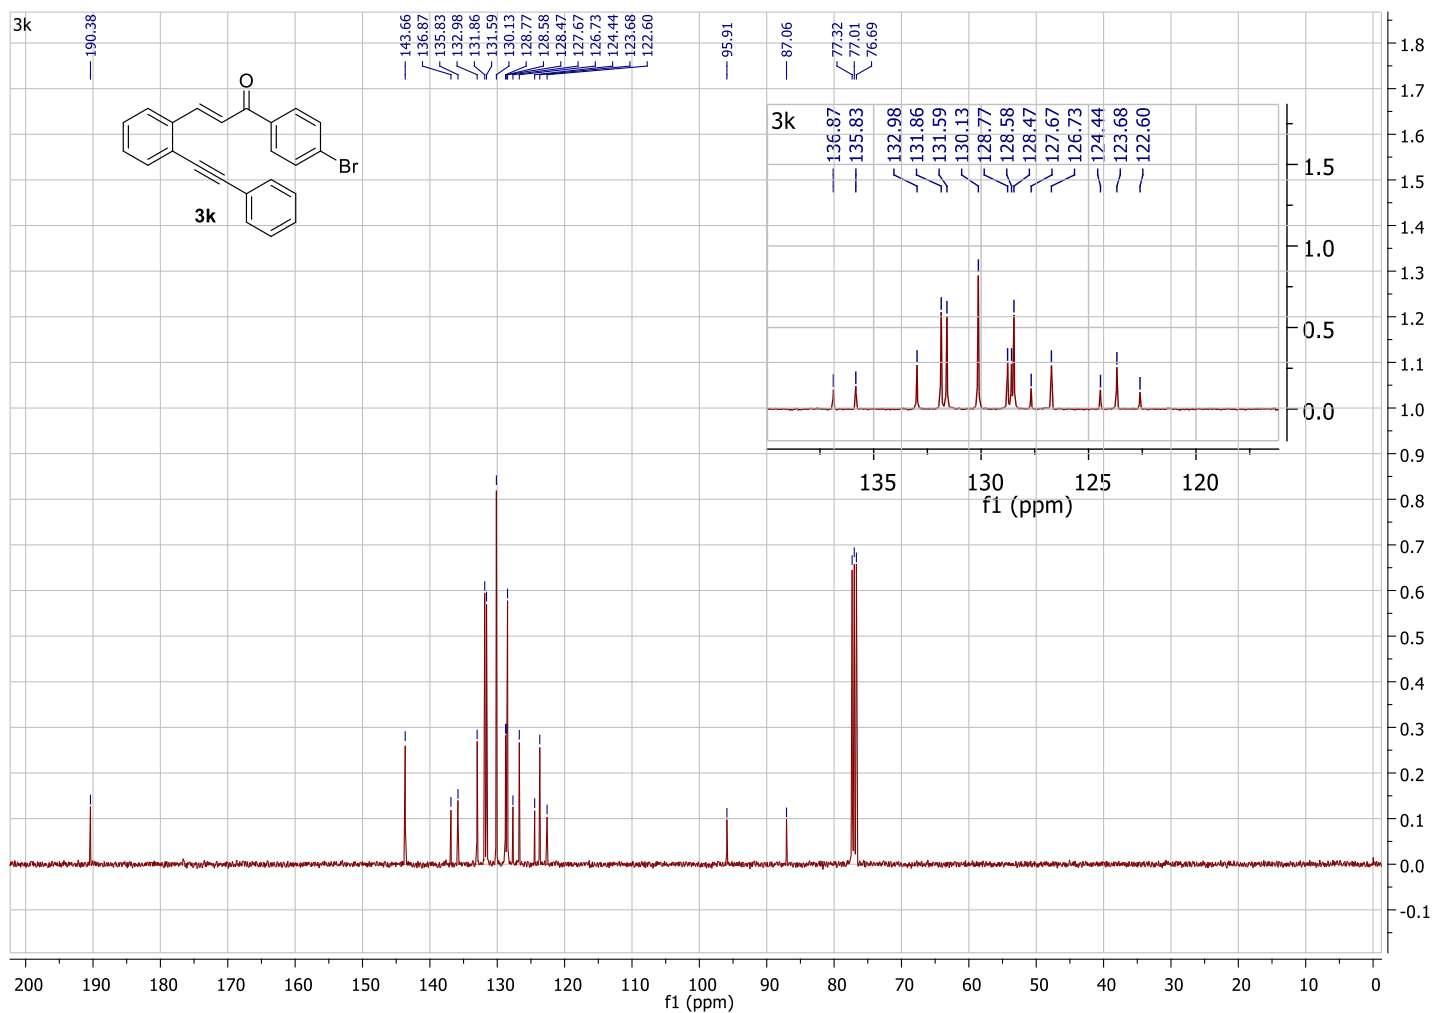

### HRMS: (3k):

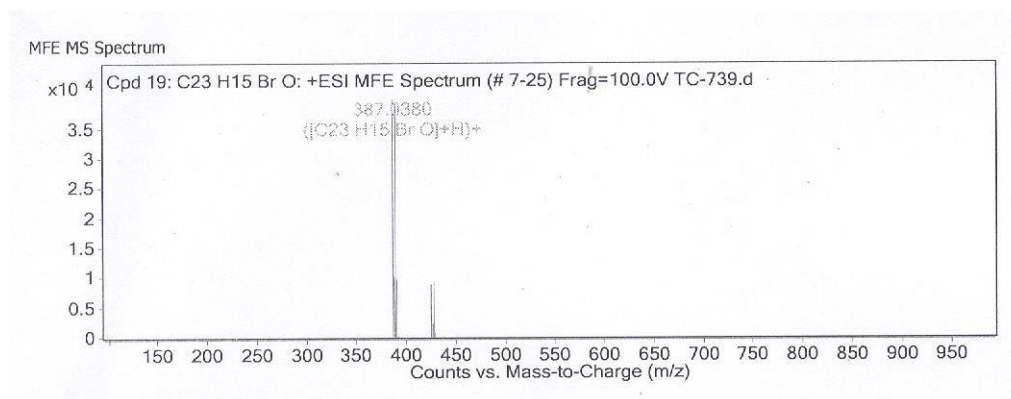

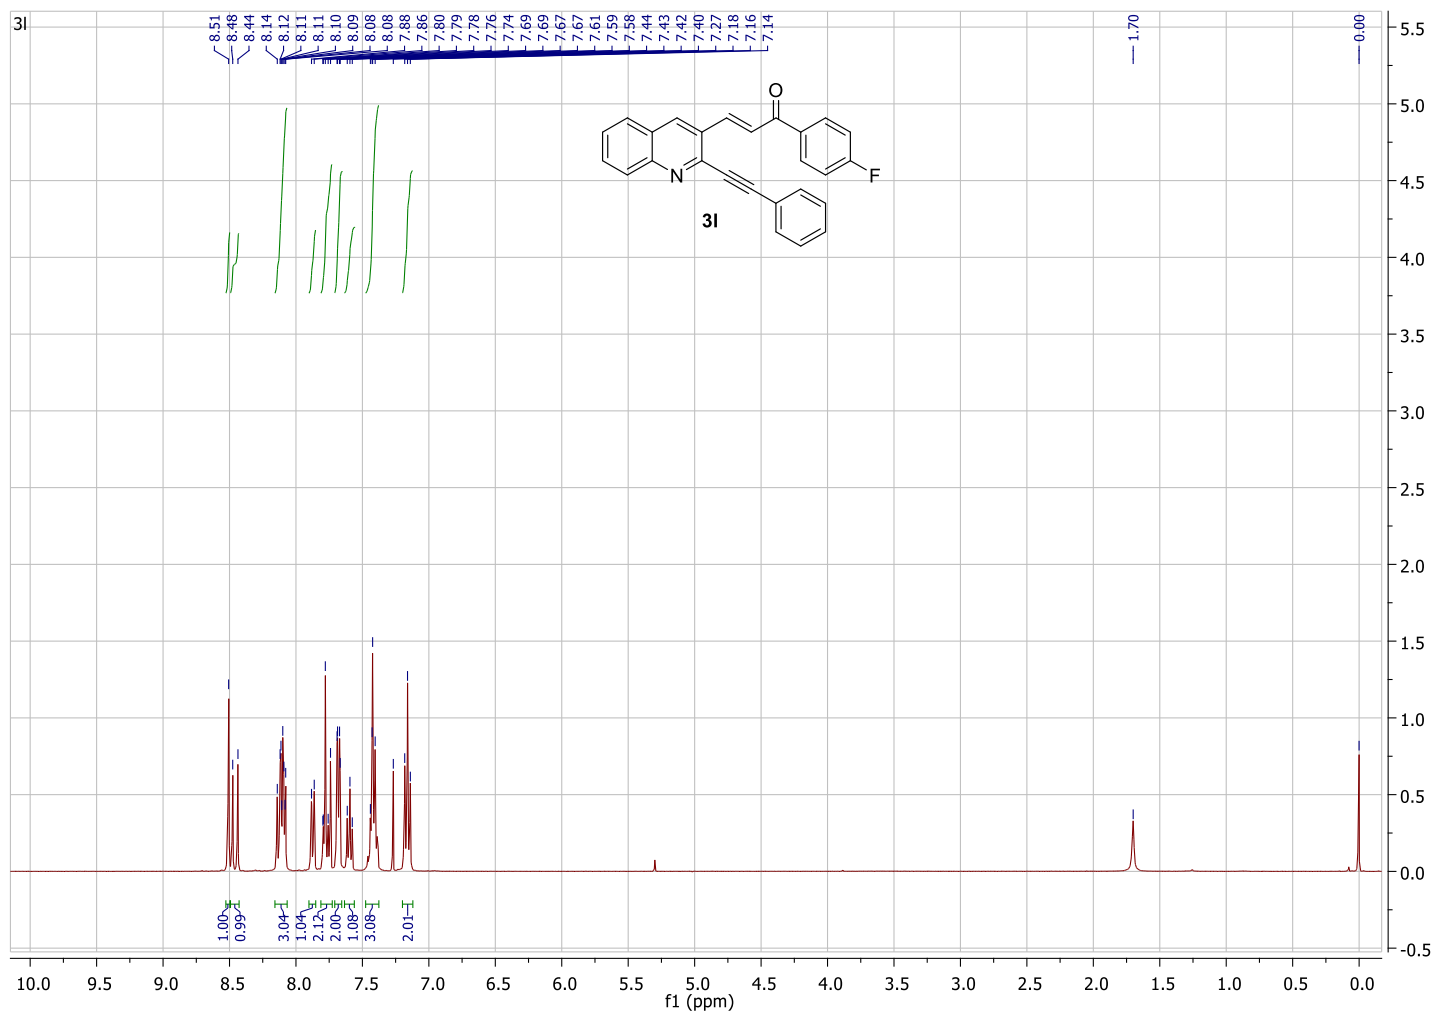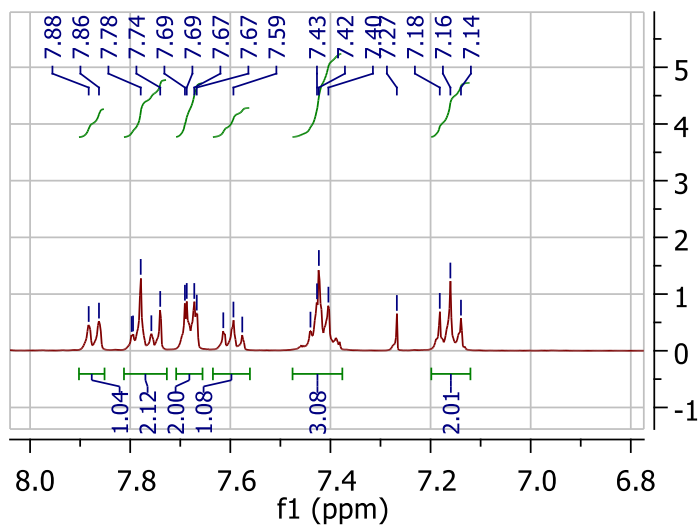

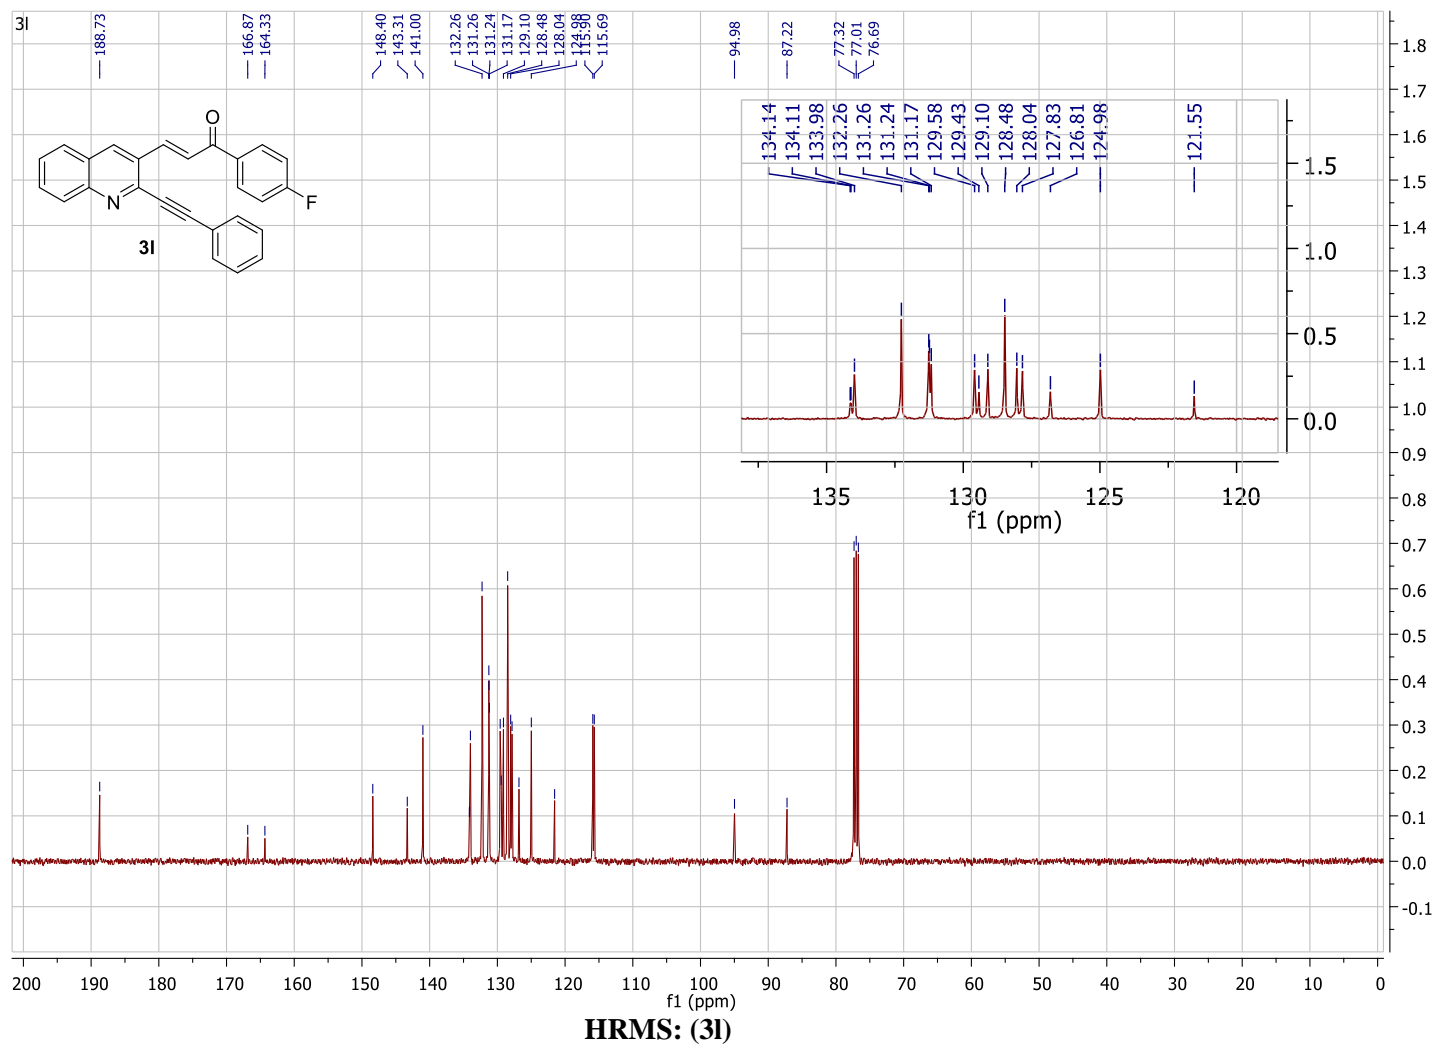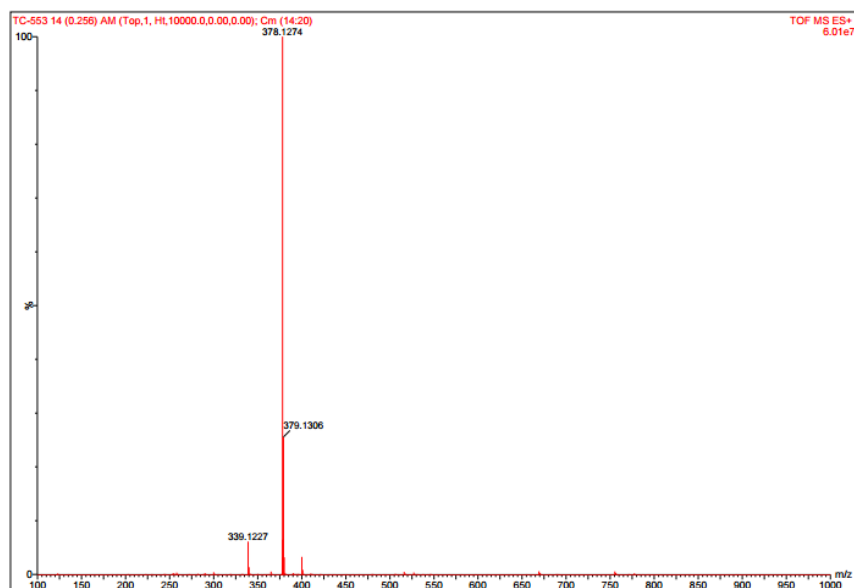

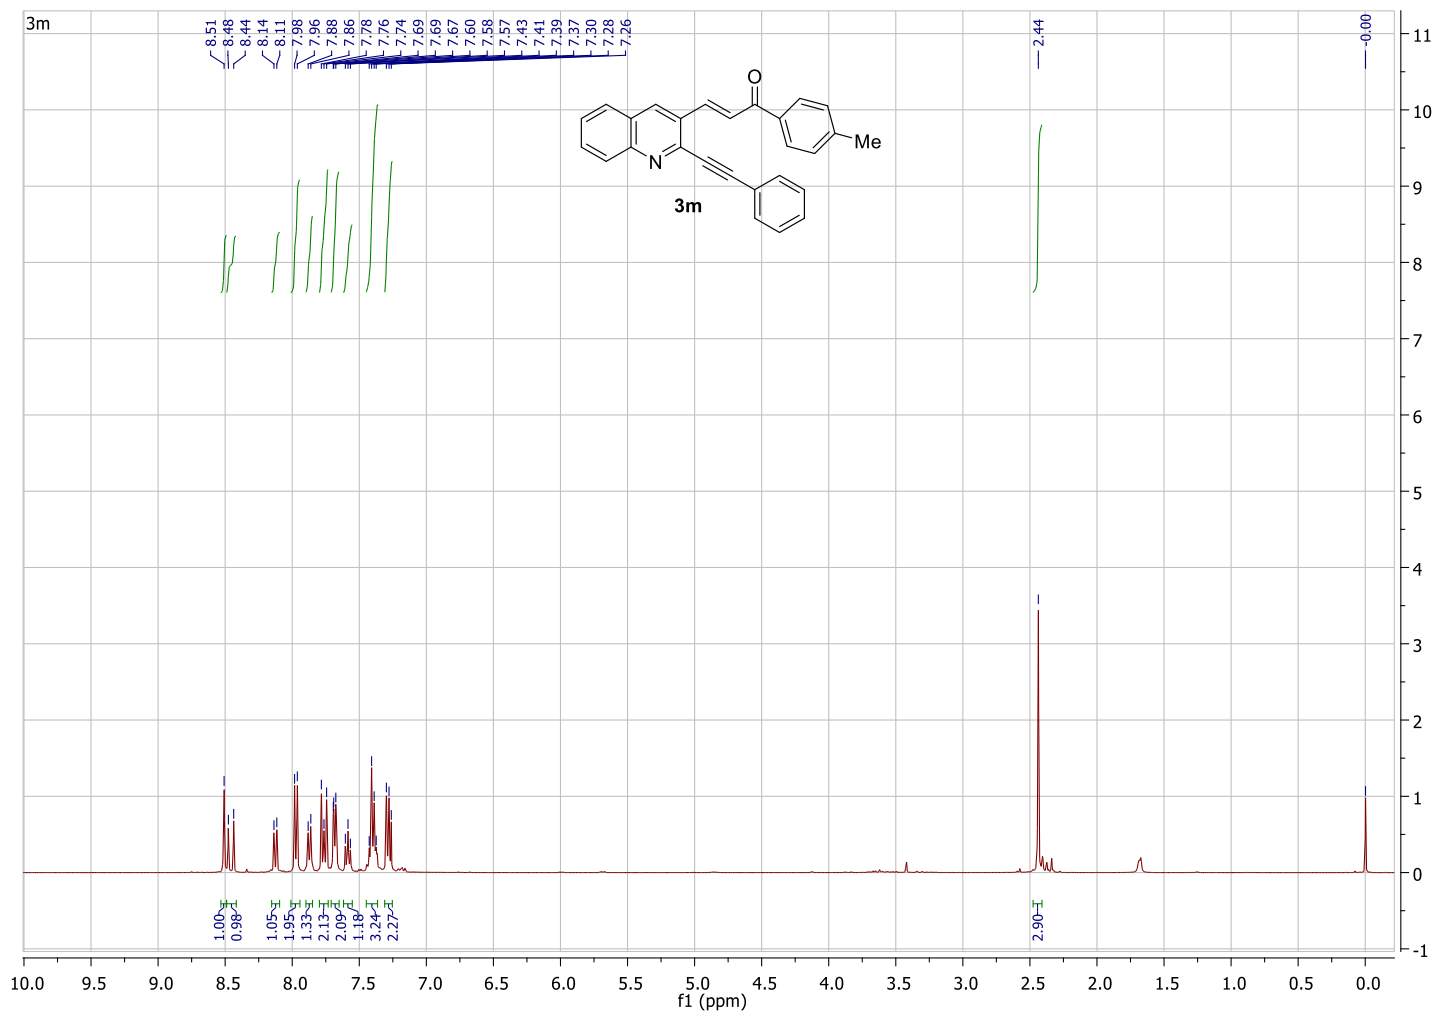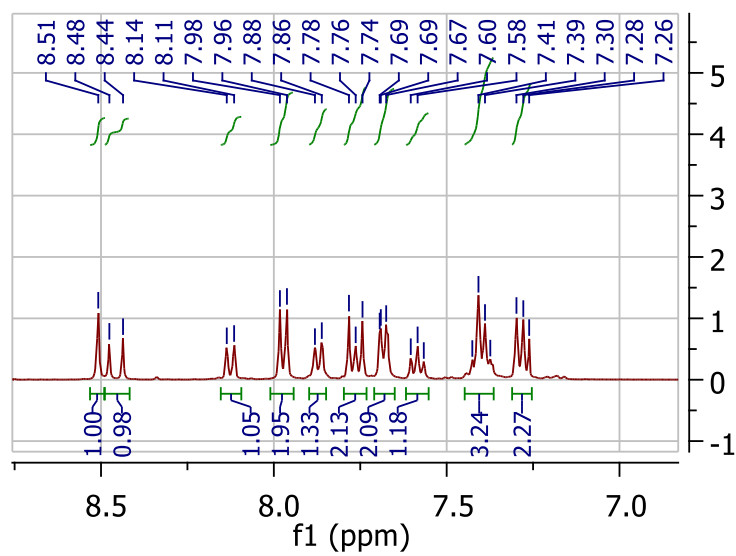

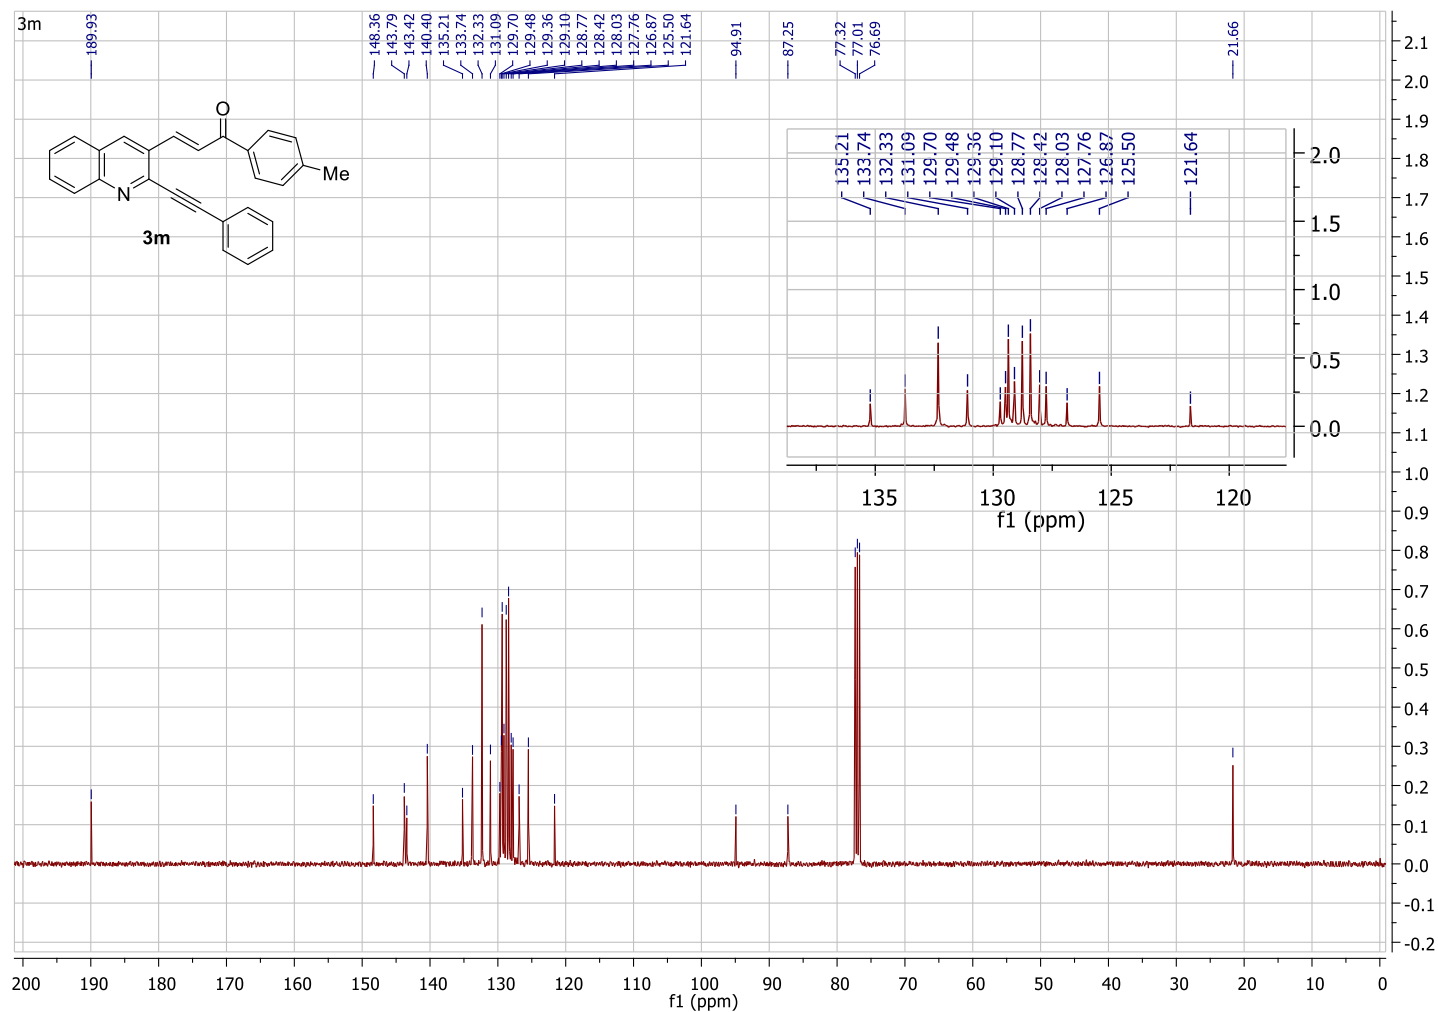

### HRMS: (3m)

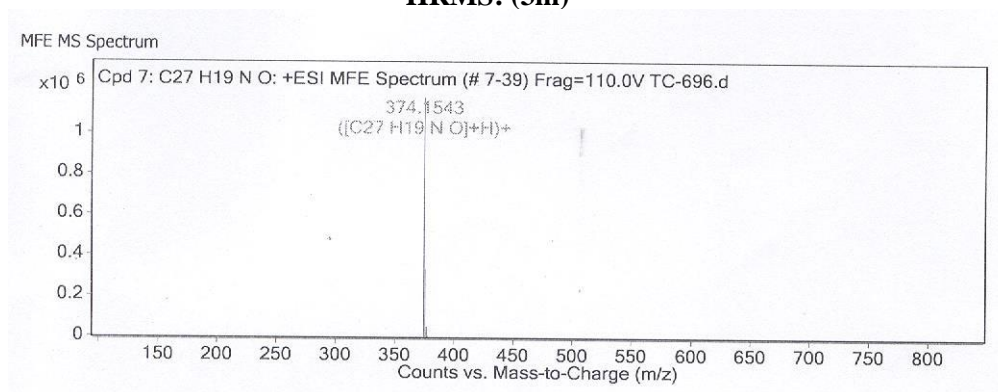

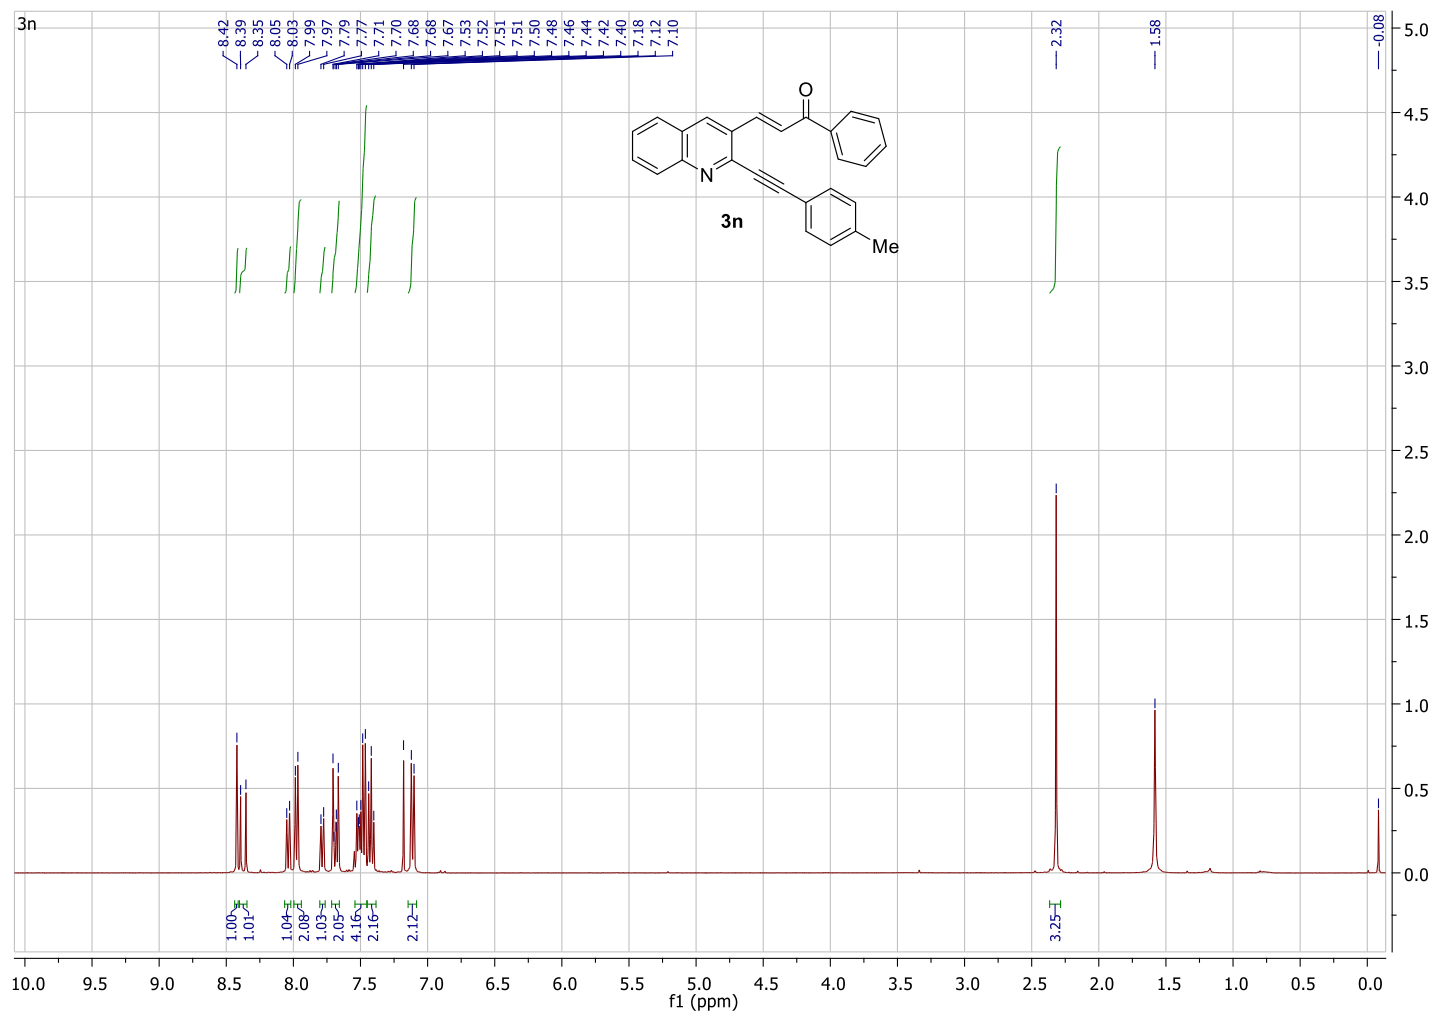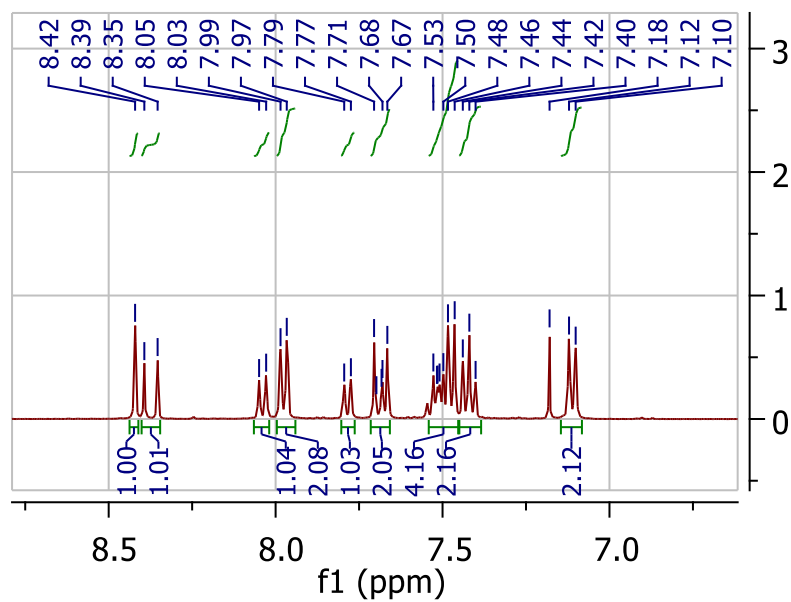



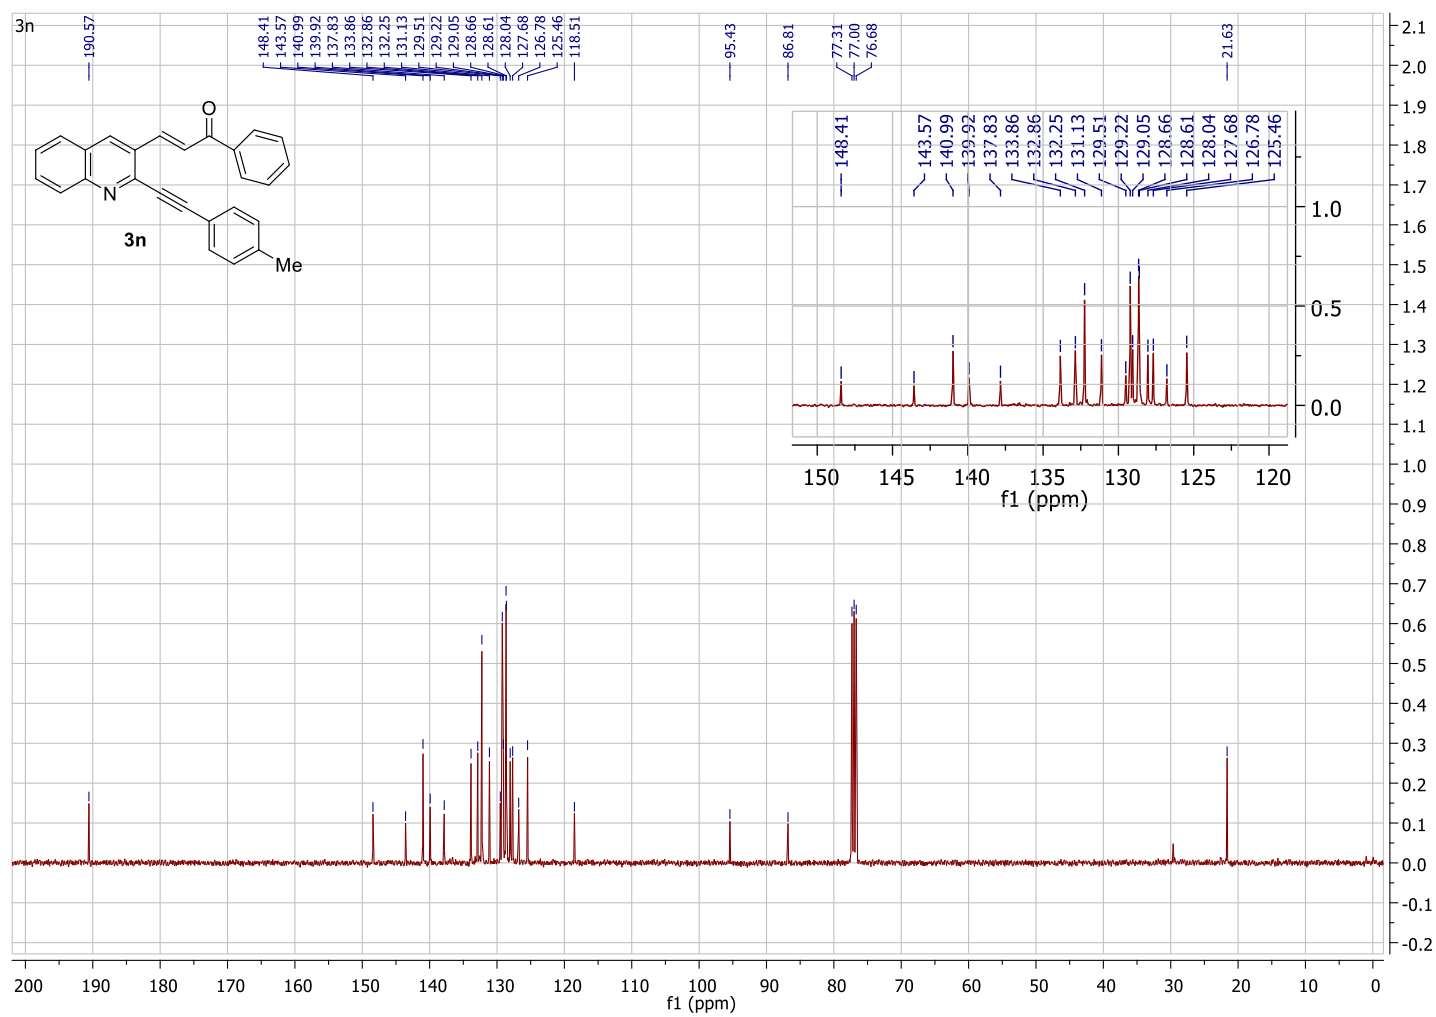

### HRMS: (3n)

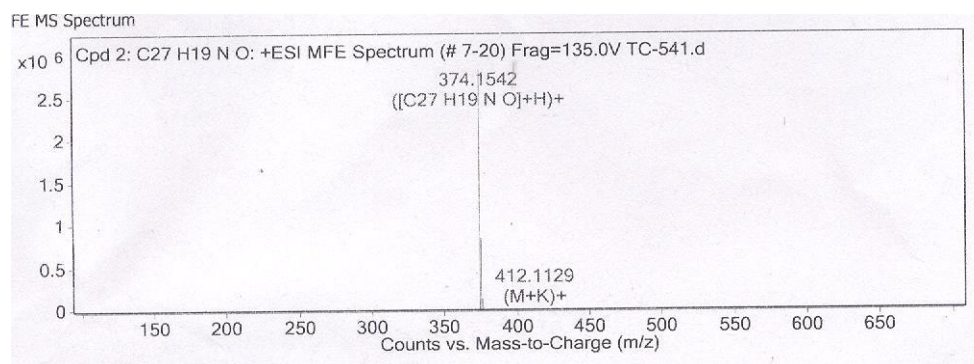

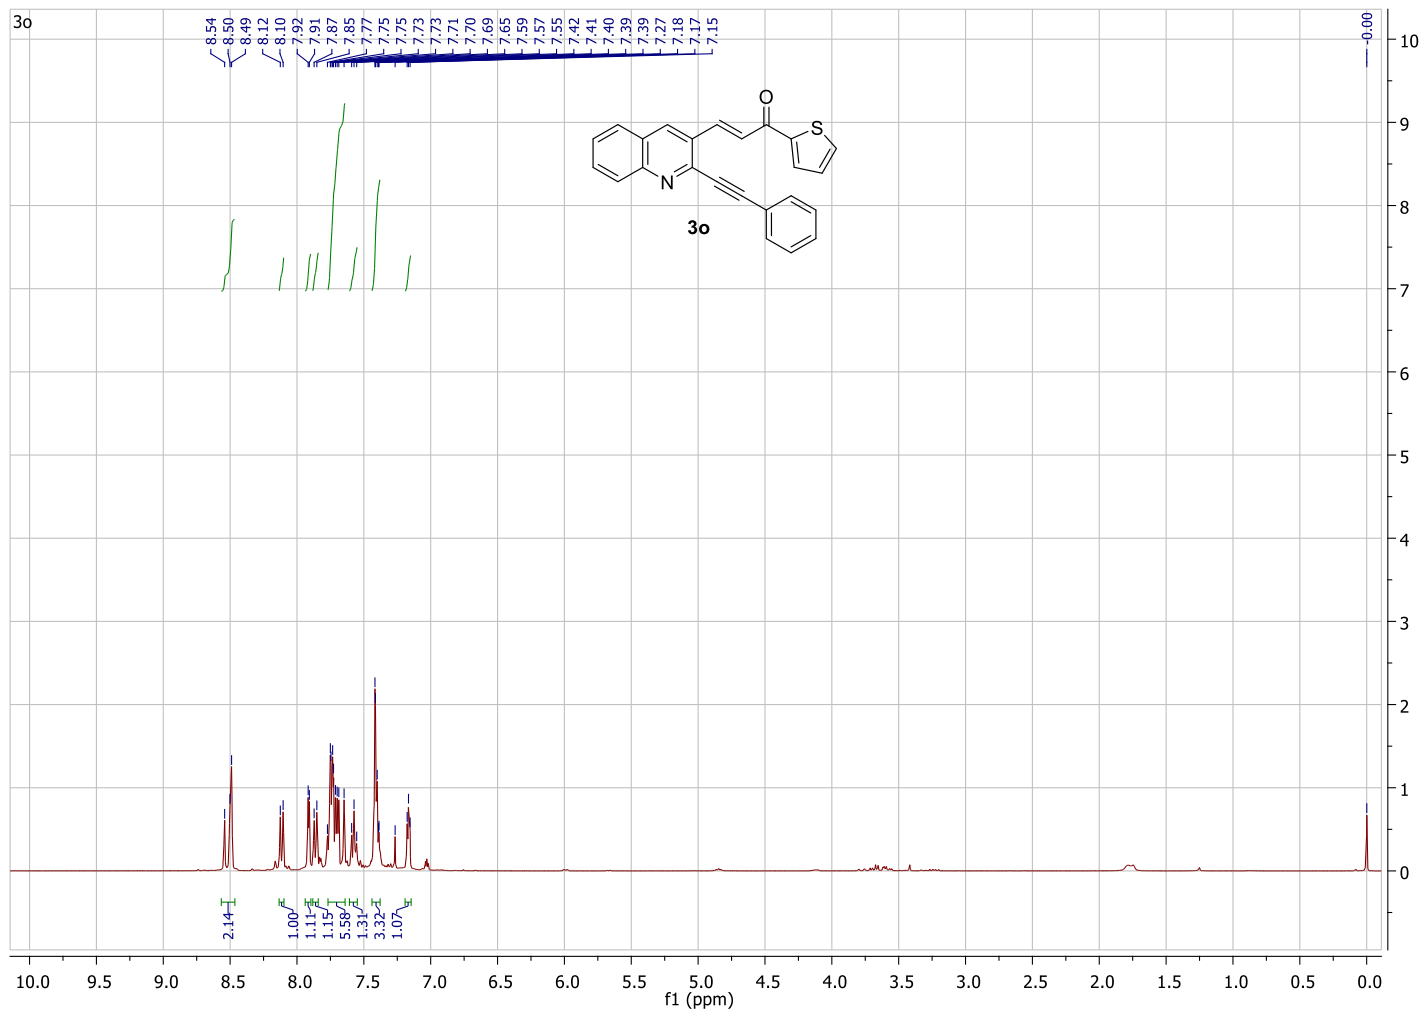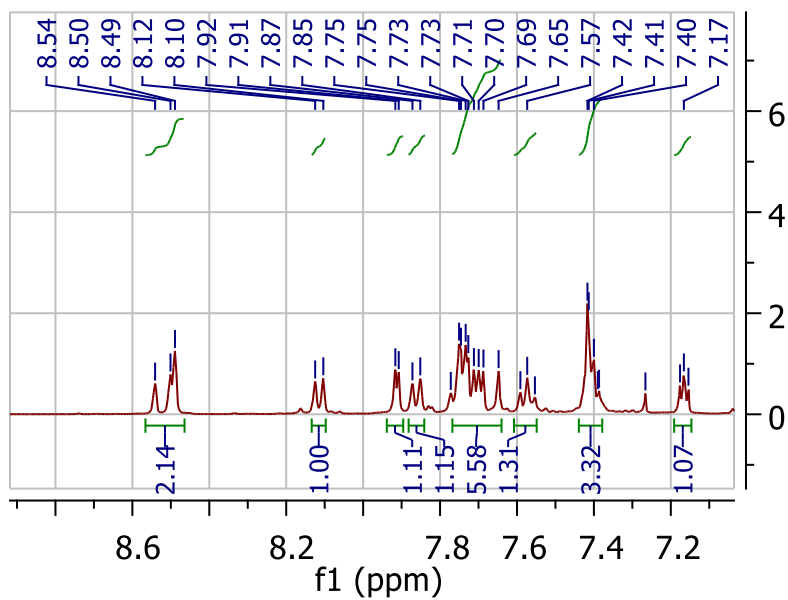

S30

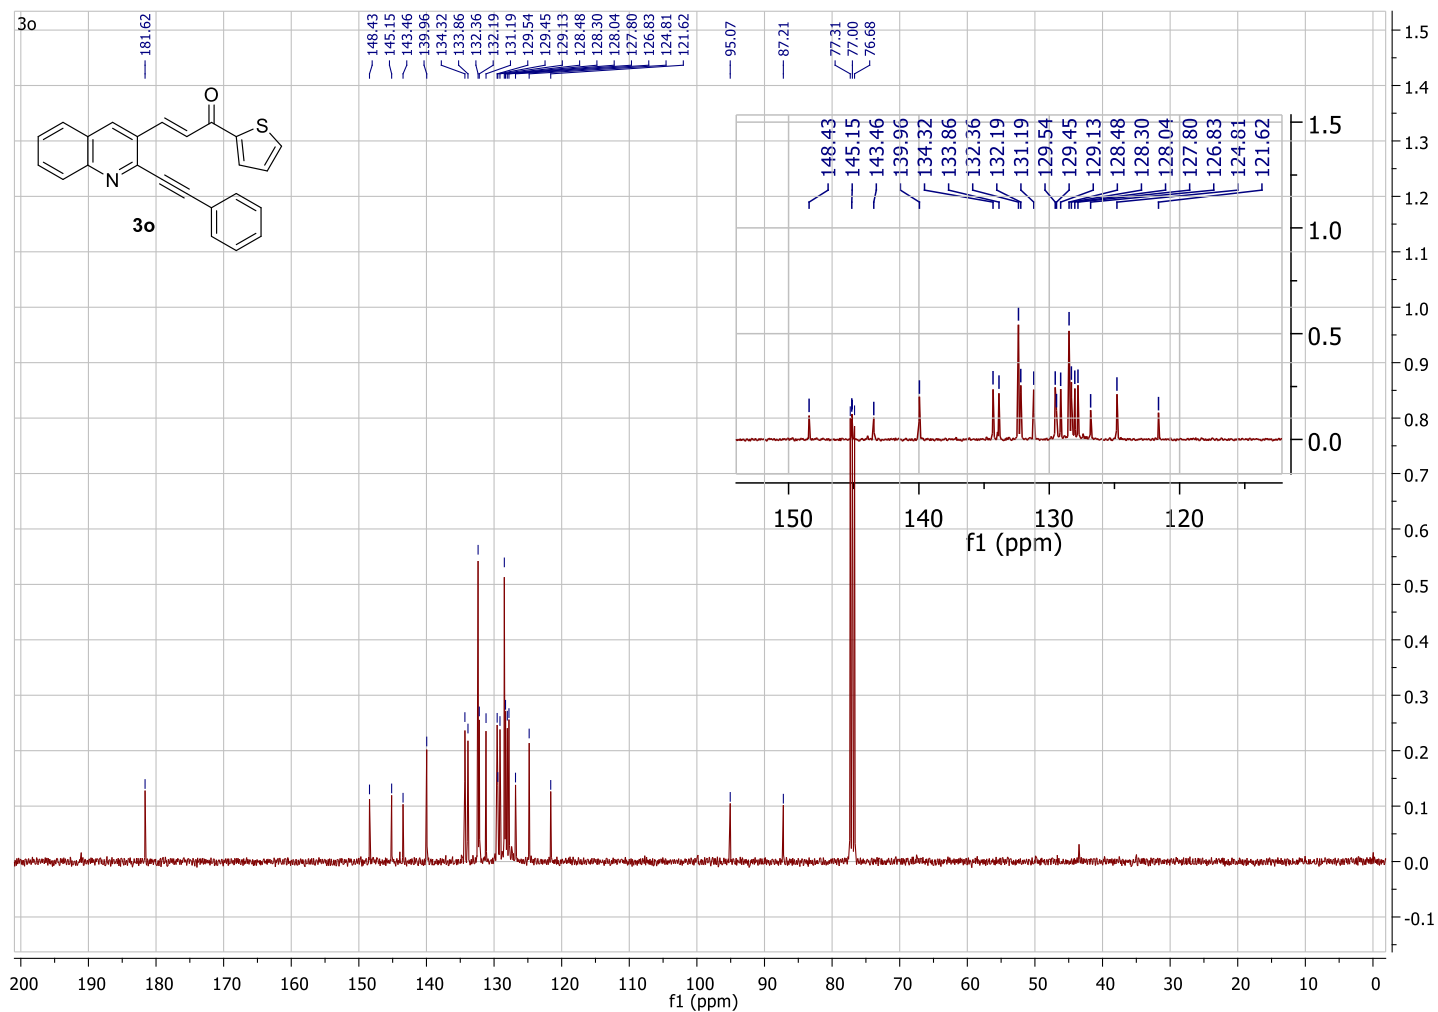

### HRMS: (3o)

MFE MS Spectrum

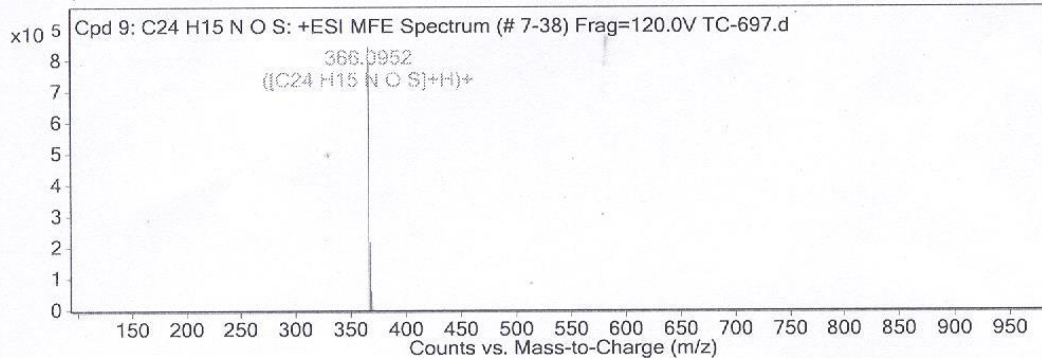

## 2. $^1\text{H}$ , $^{13}\text{C}$ NMR and HRMS spectra of compounds 3a-7h and 8:

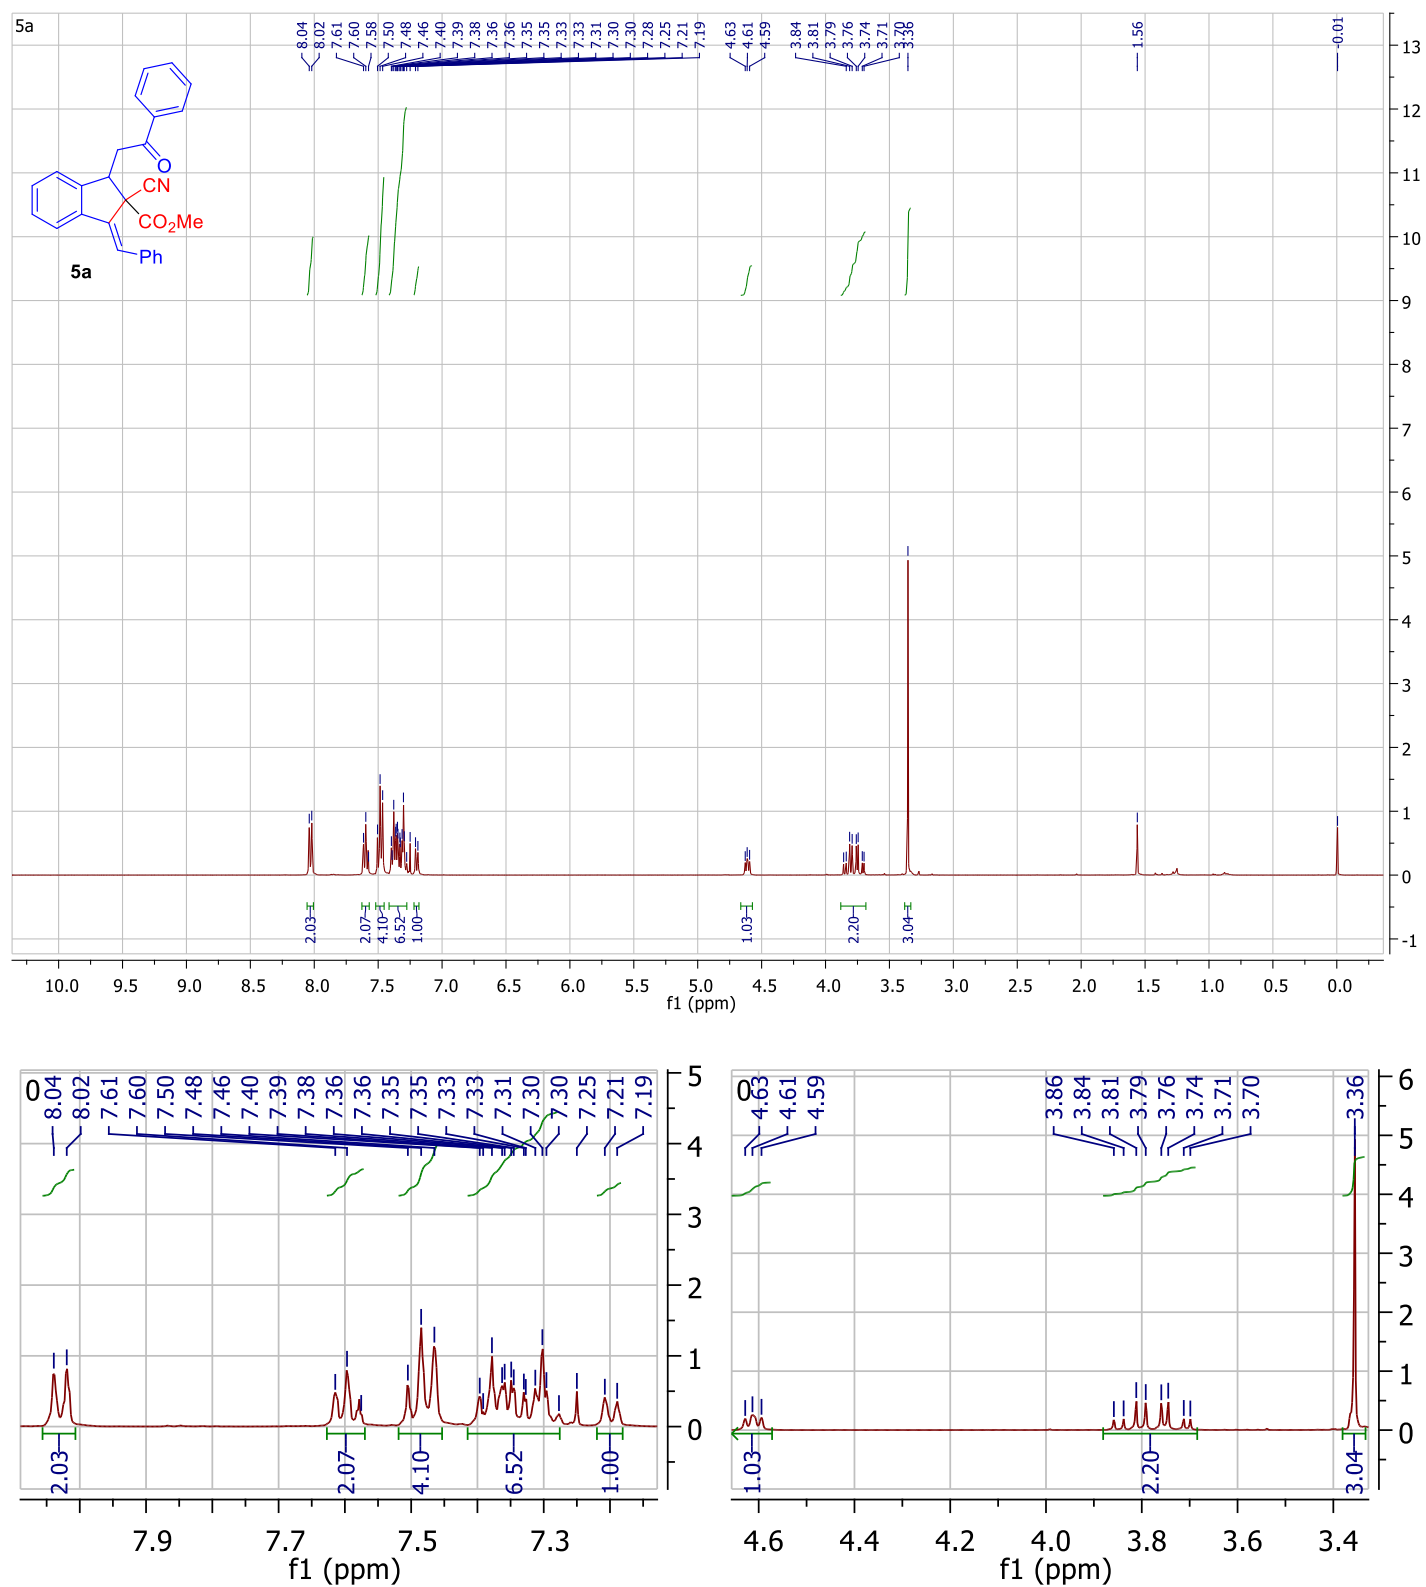

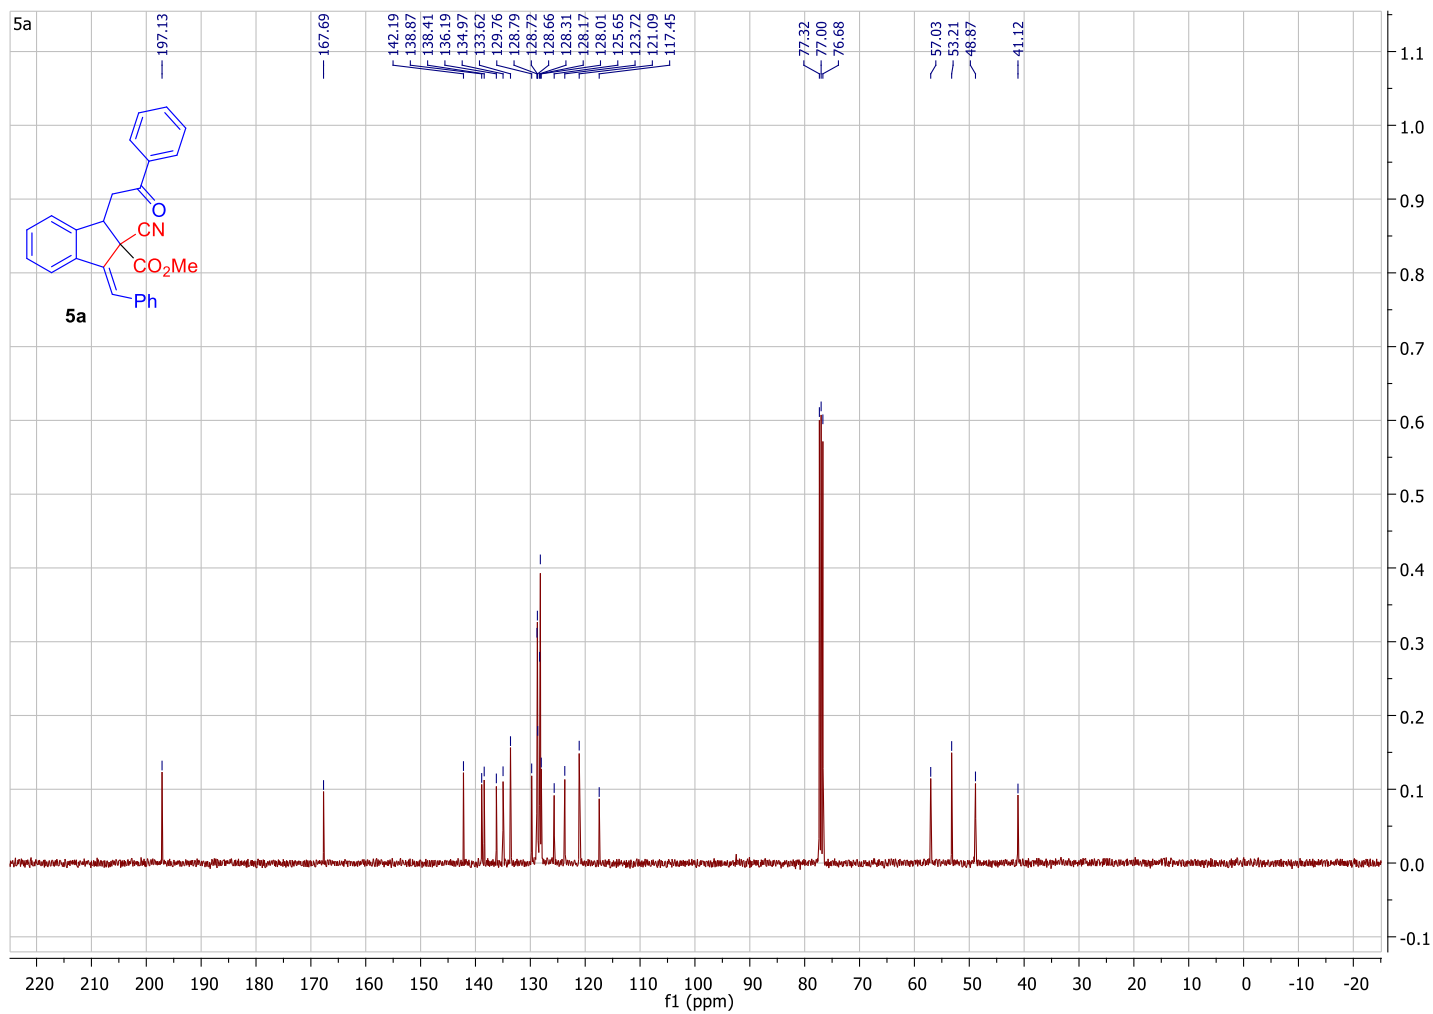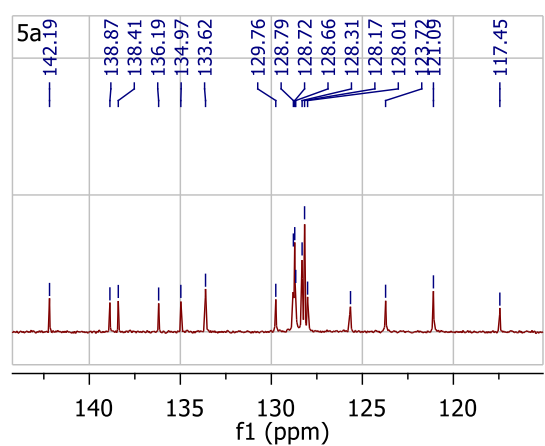

### HRMS: (5a)

MFE MS Spectrum

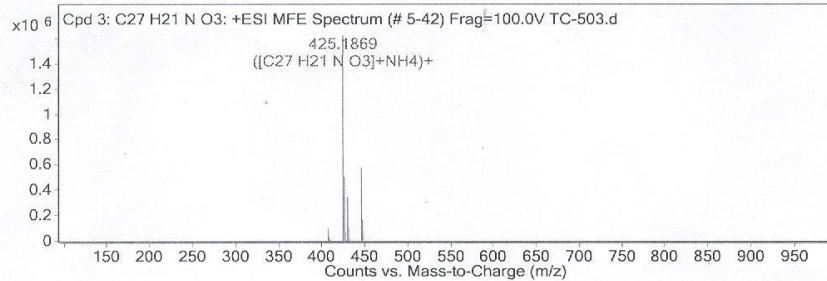

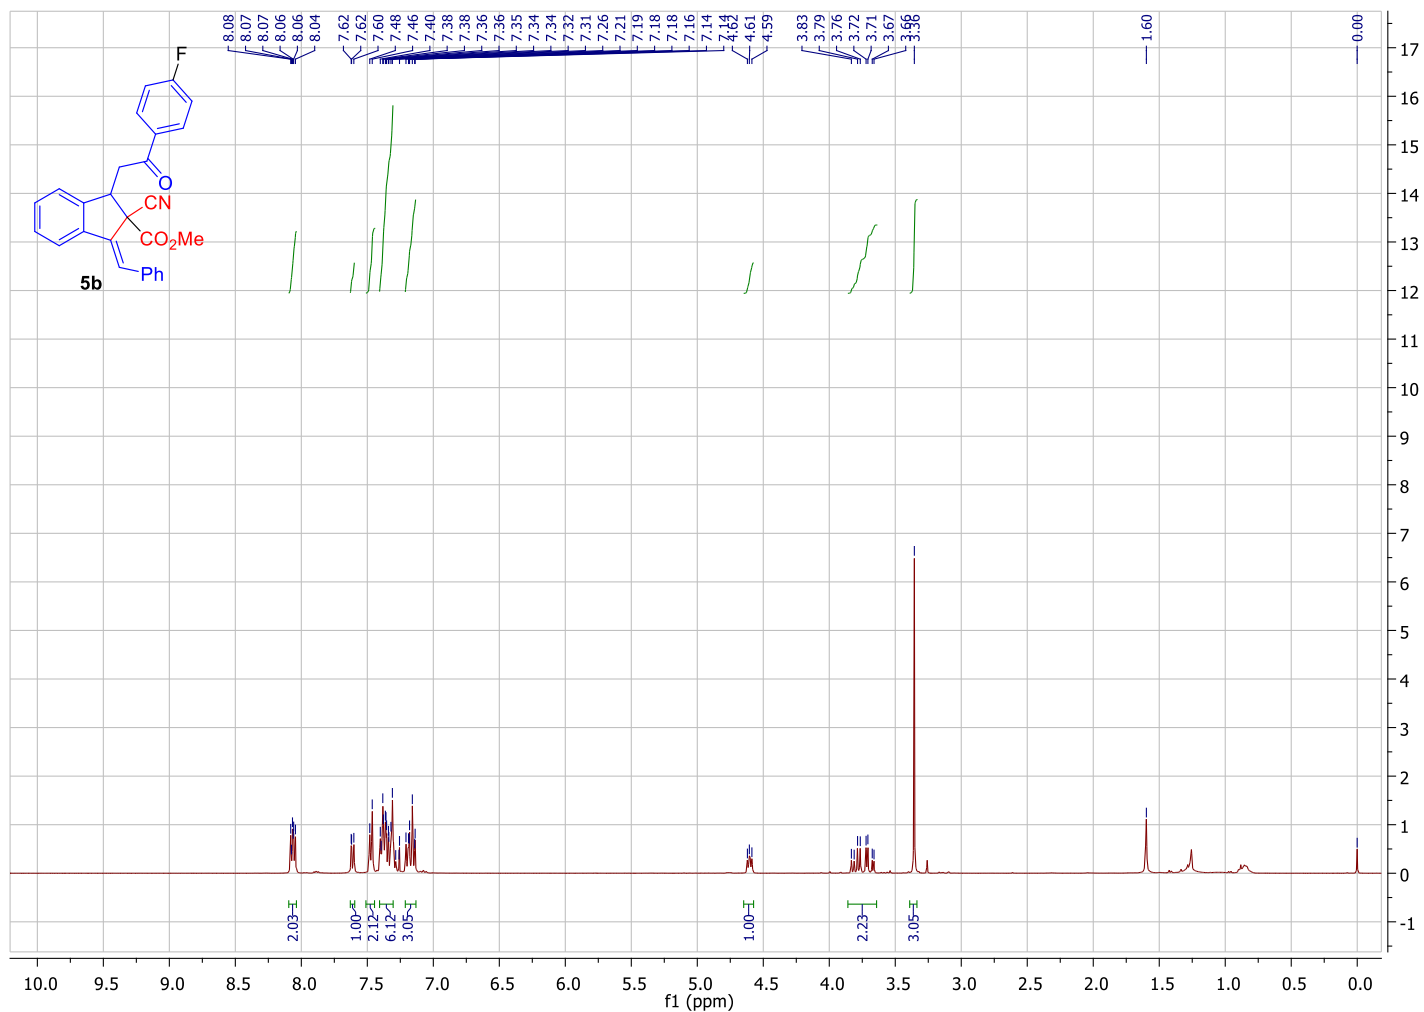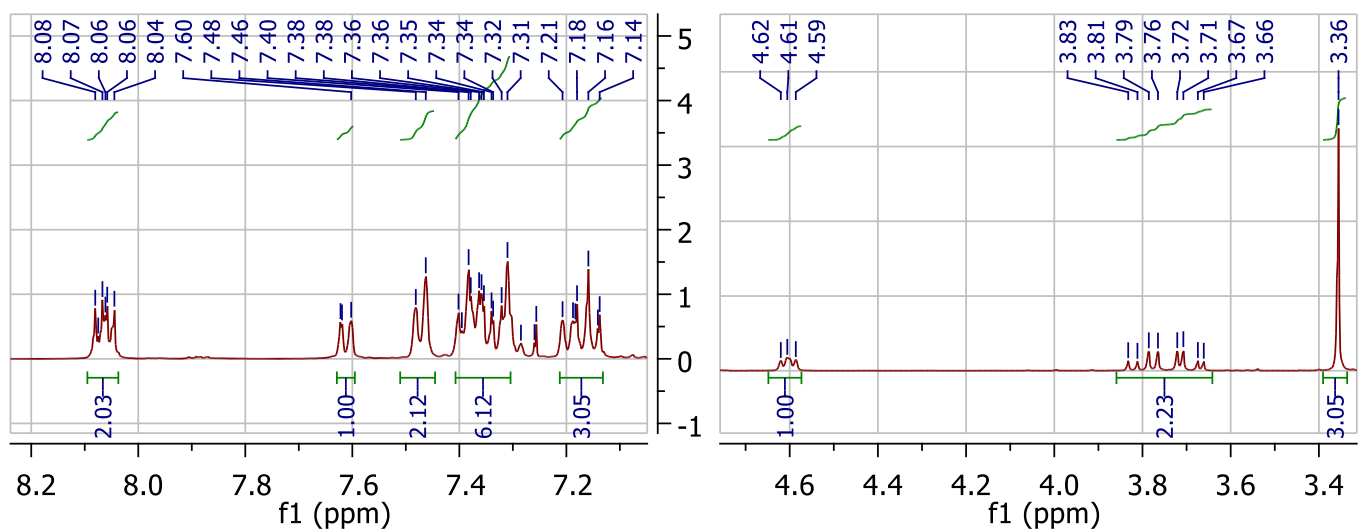

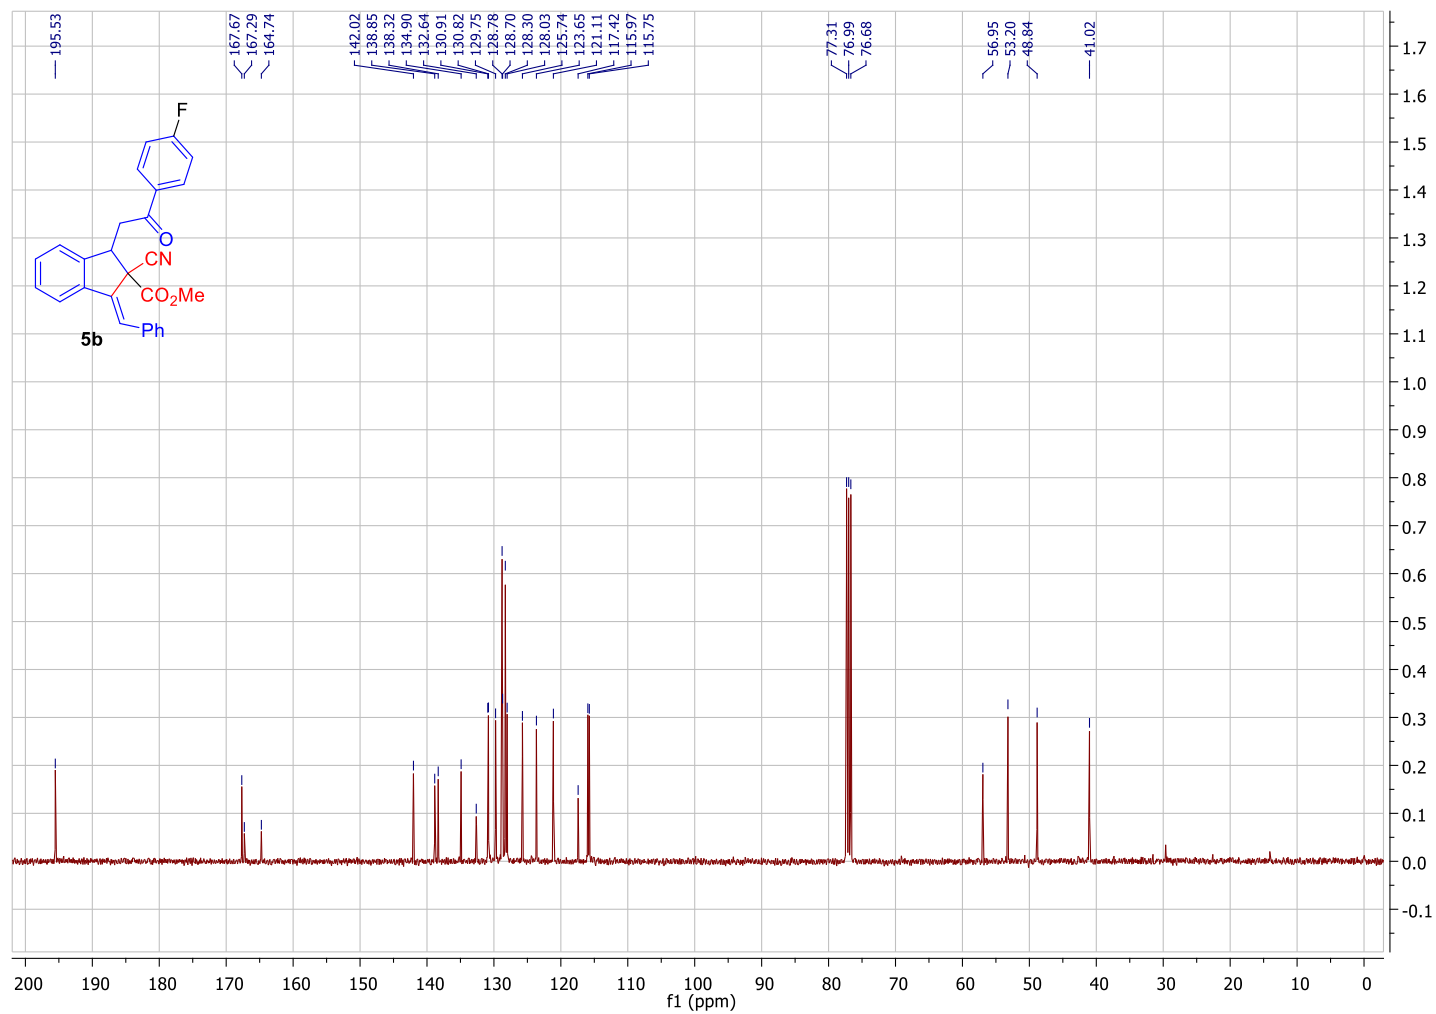

### HRMS: (5b):

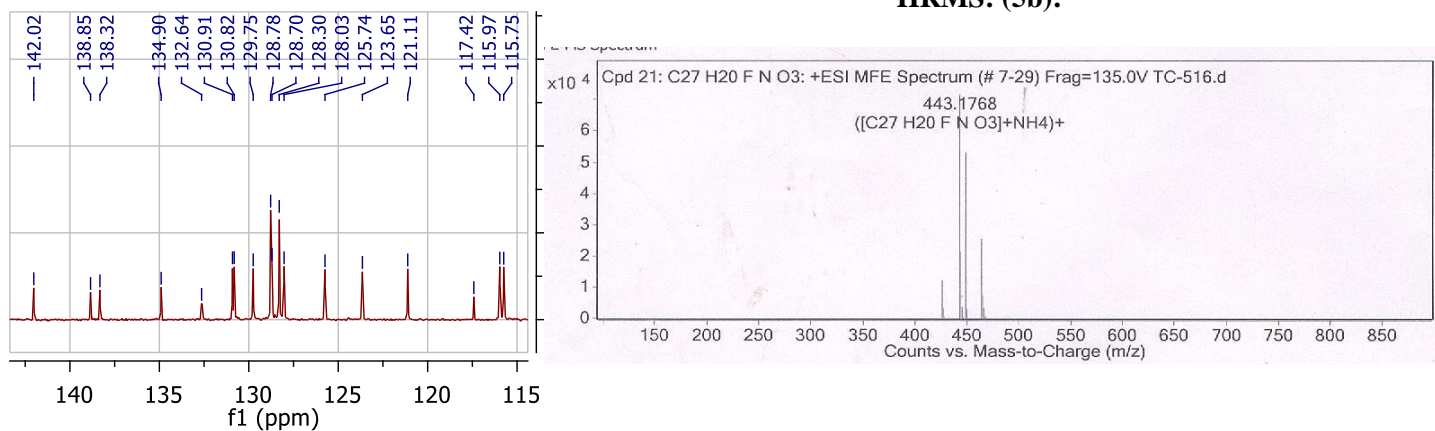

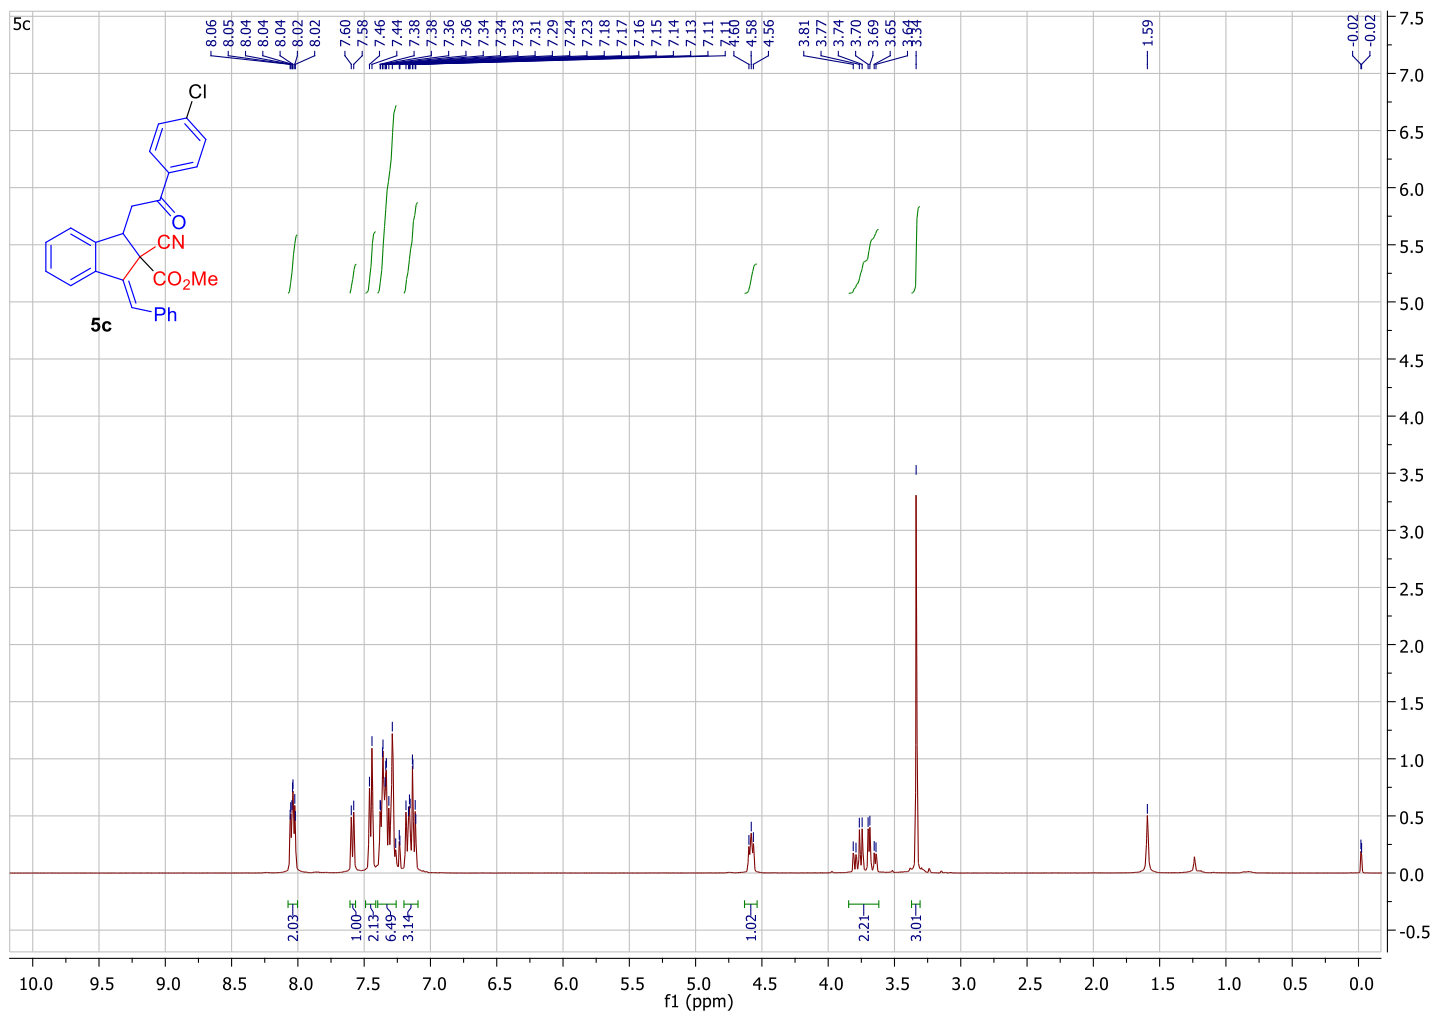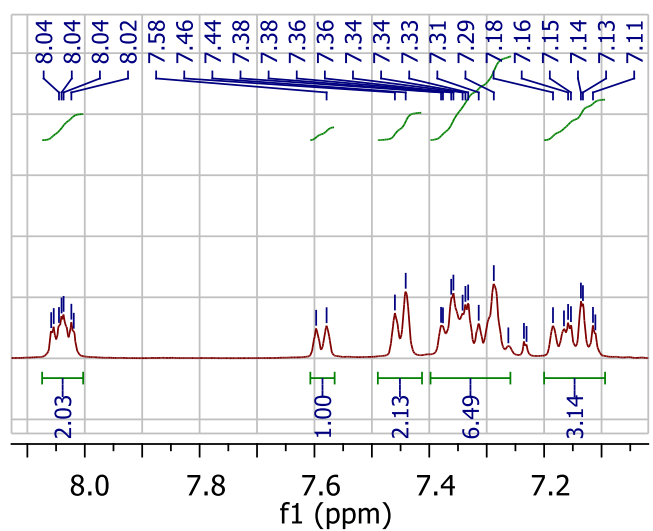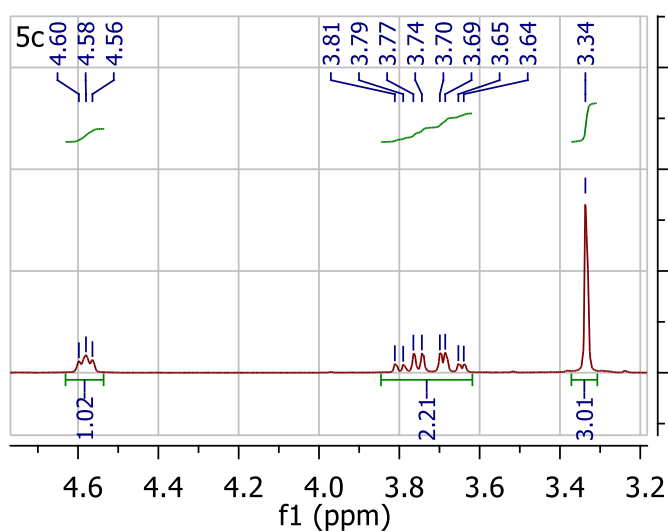



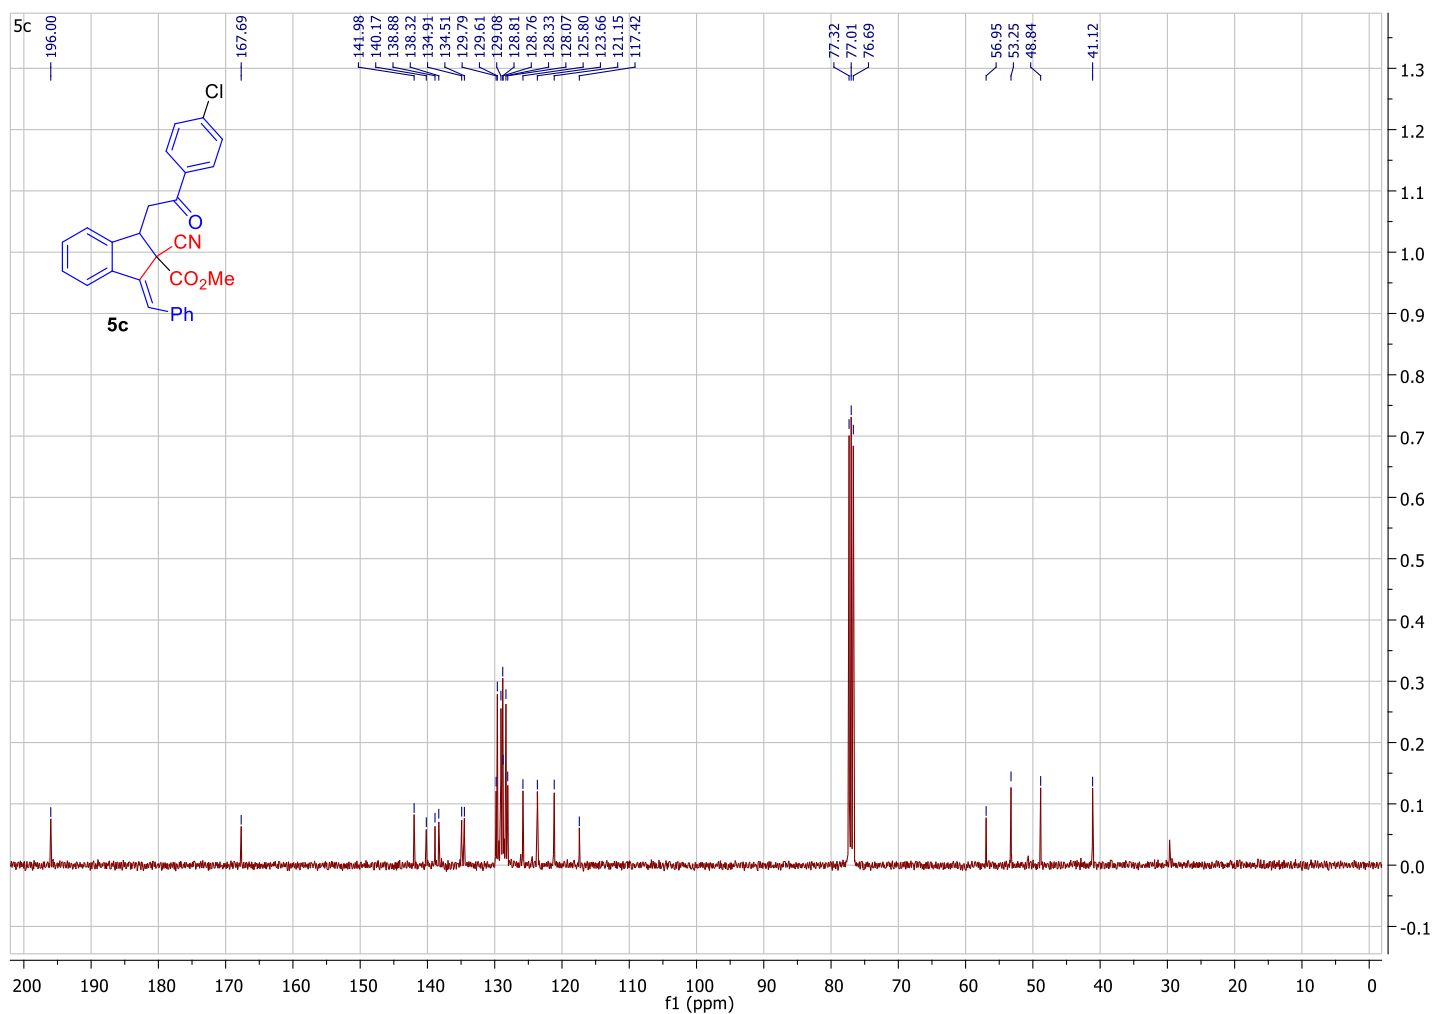

### HRMS: (5c)

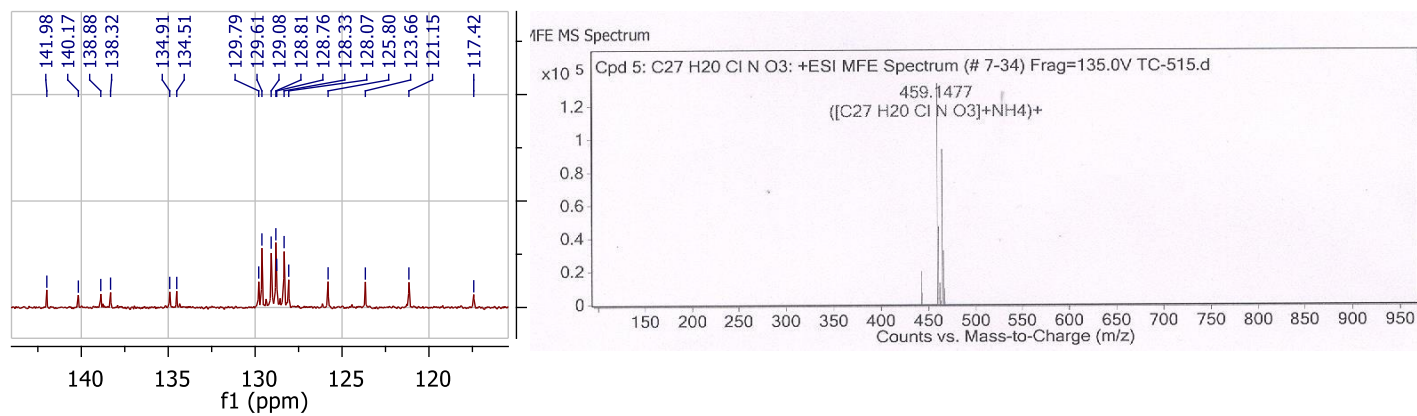

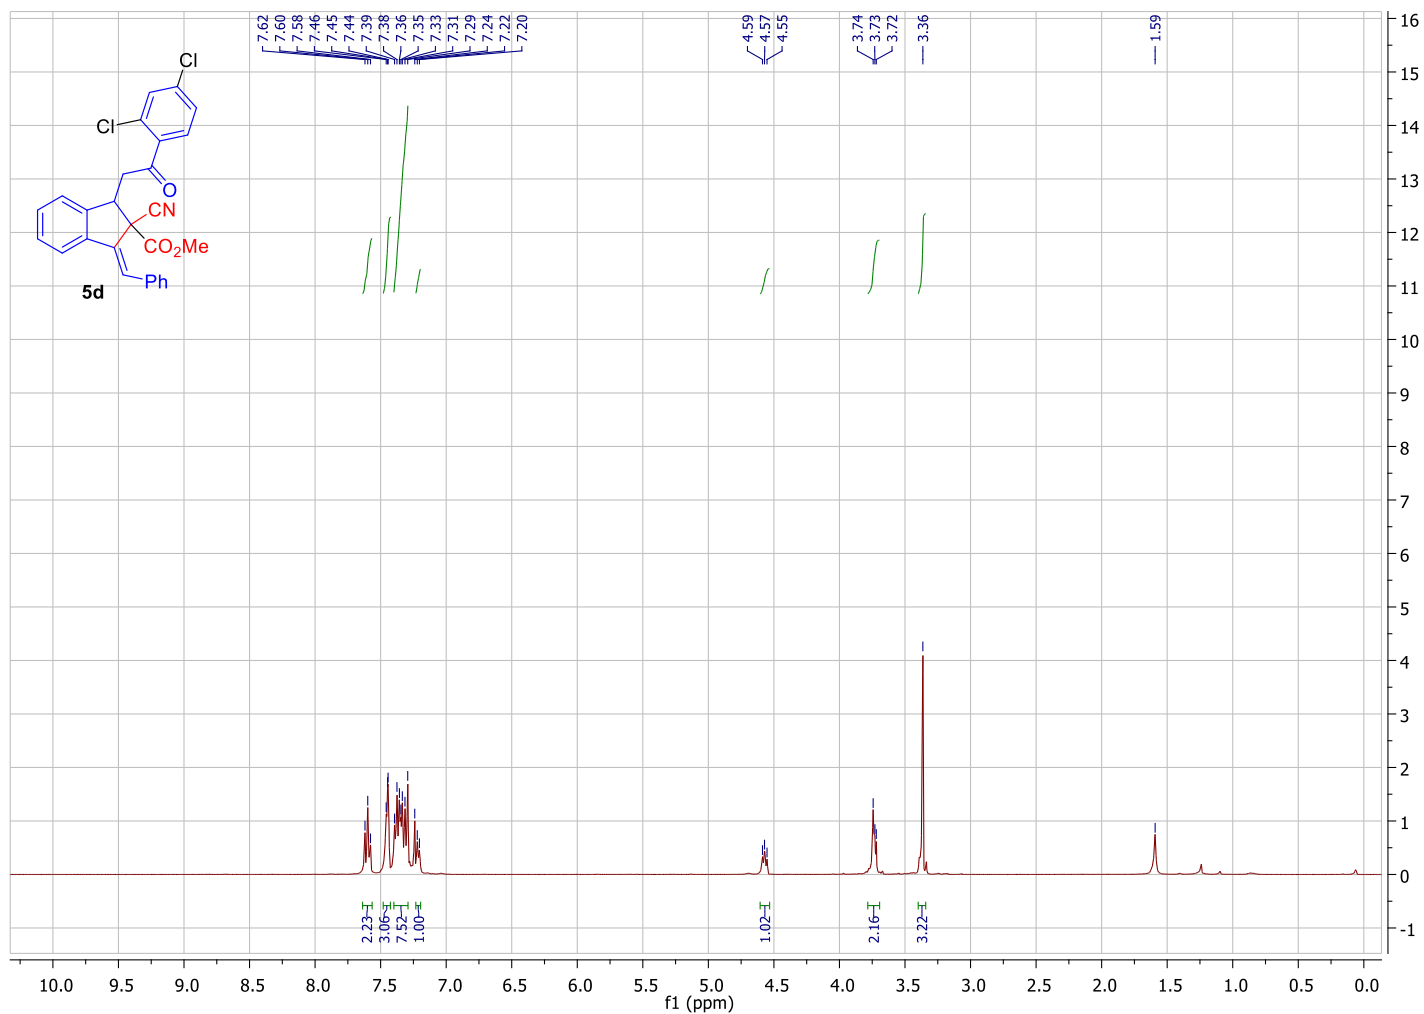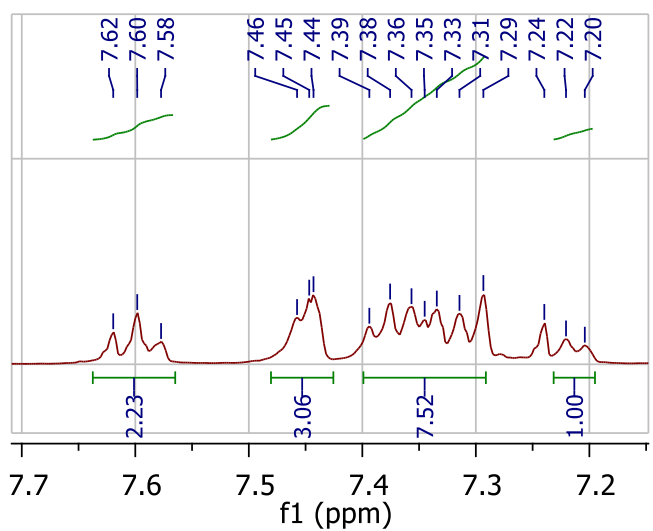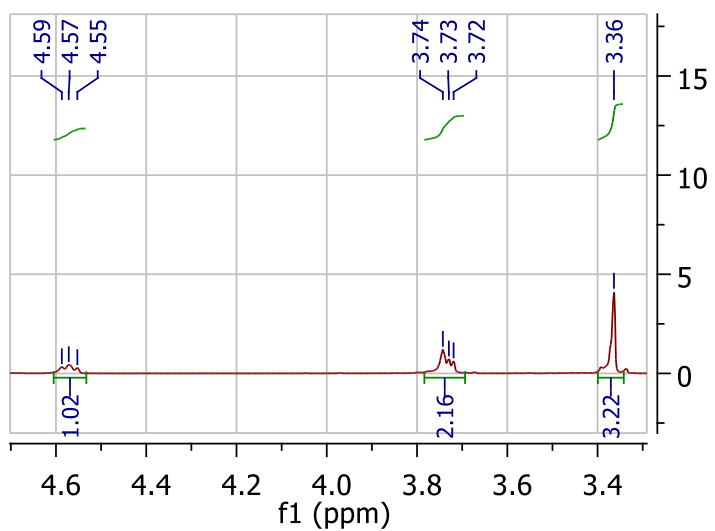

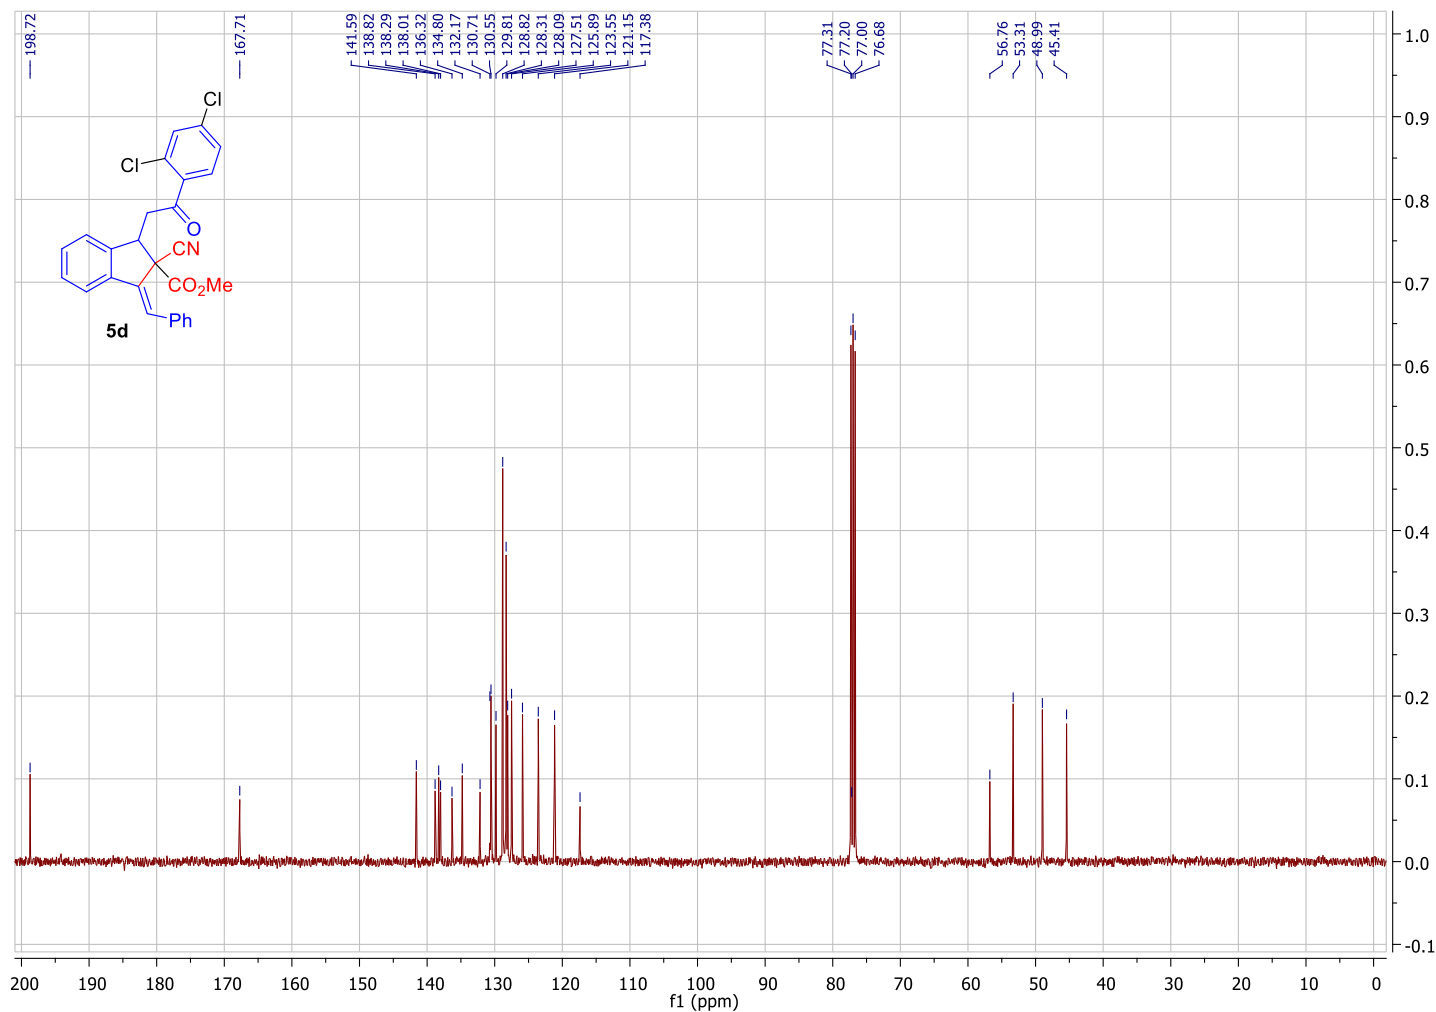

### HRMS: (5d)

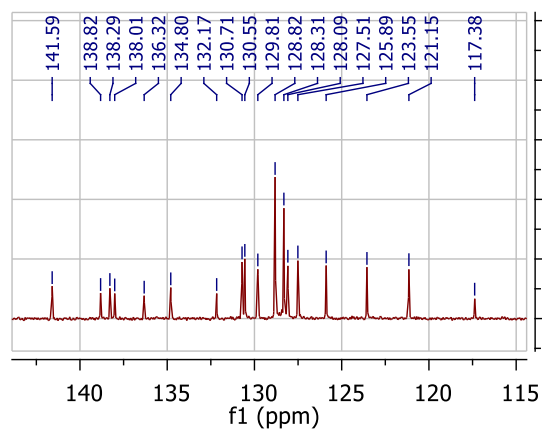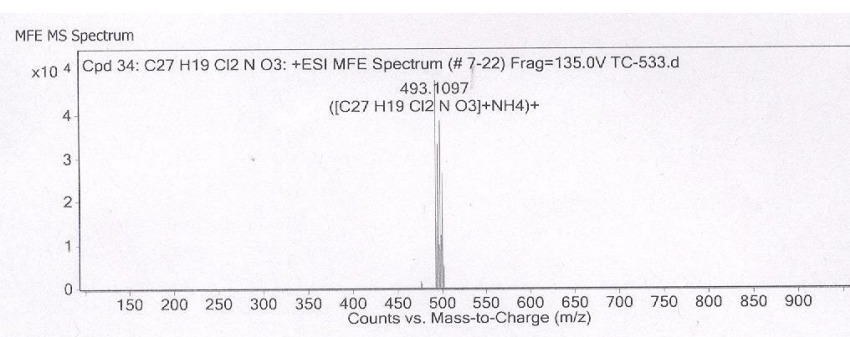

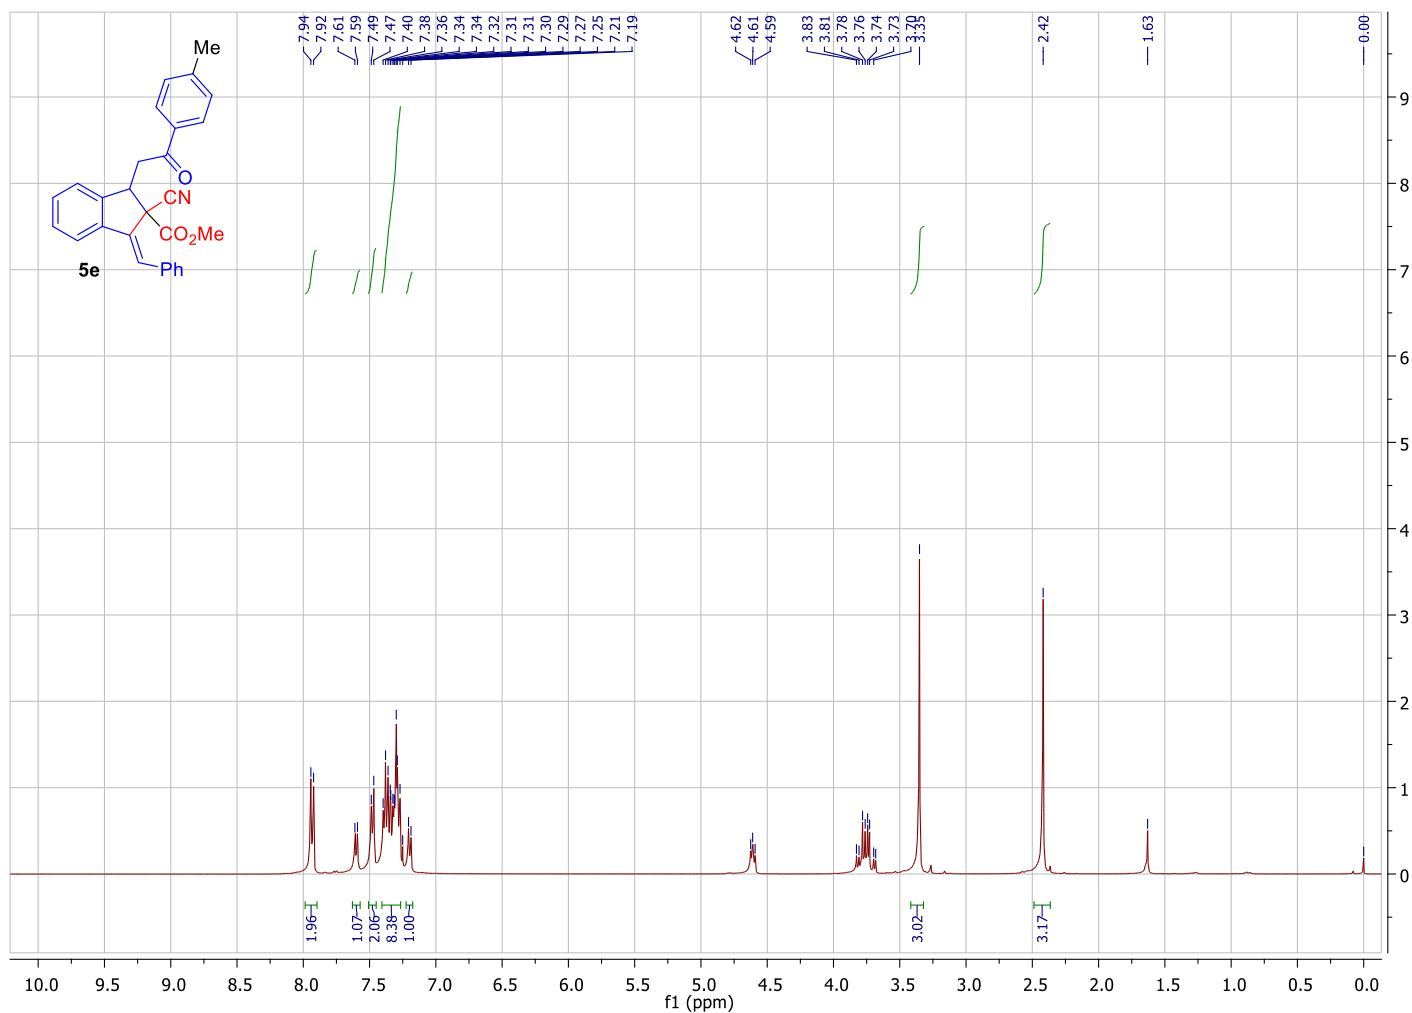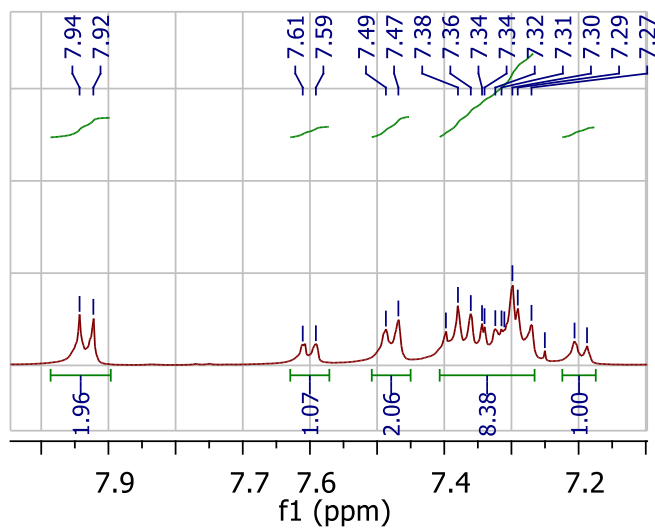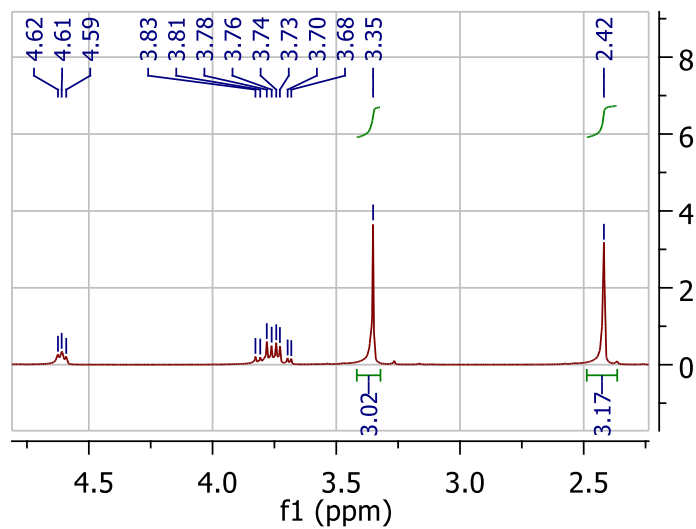

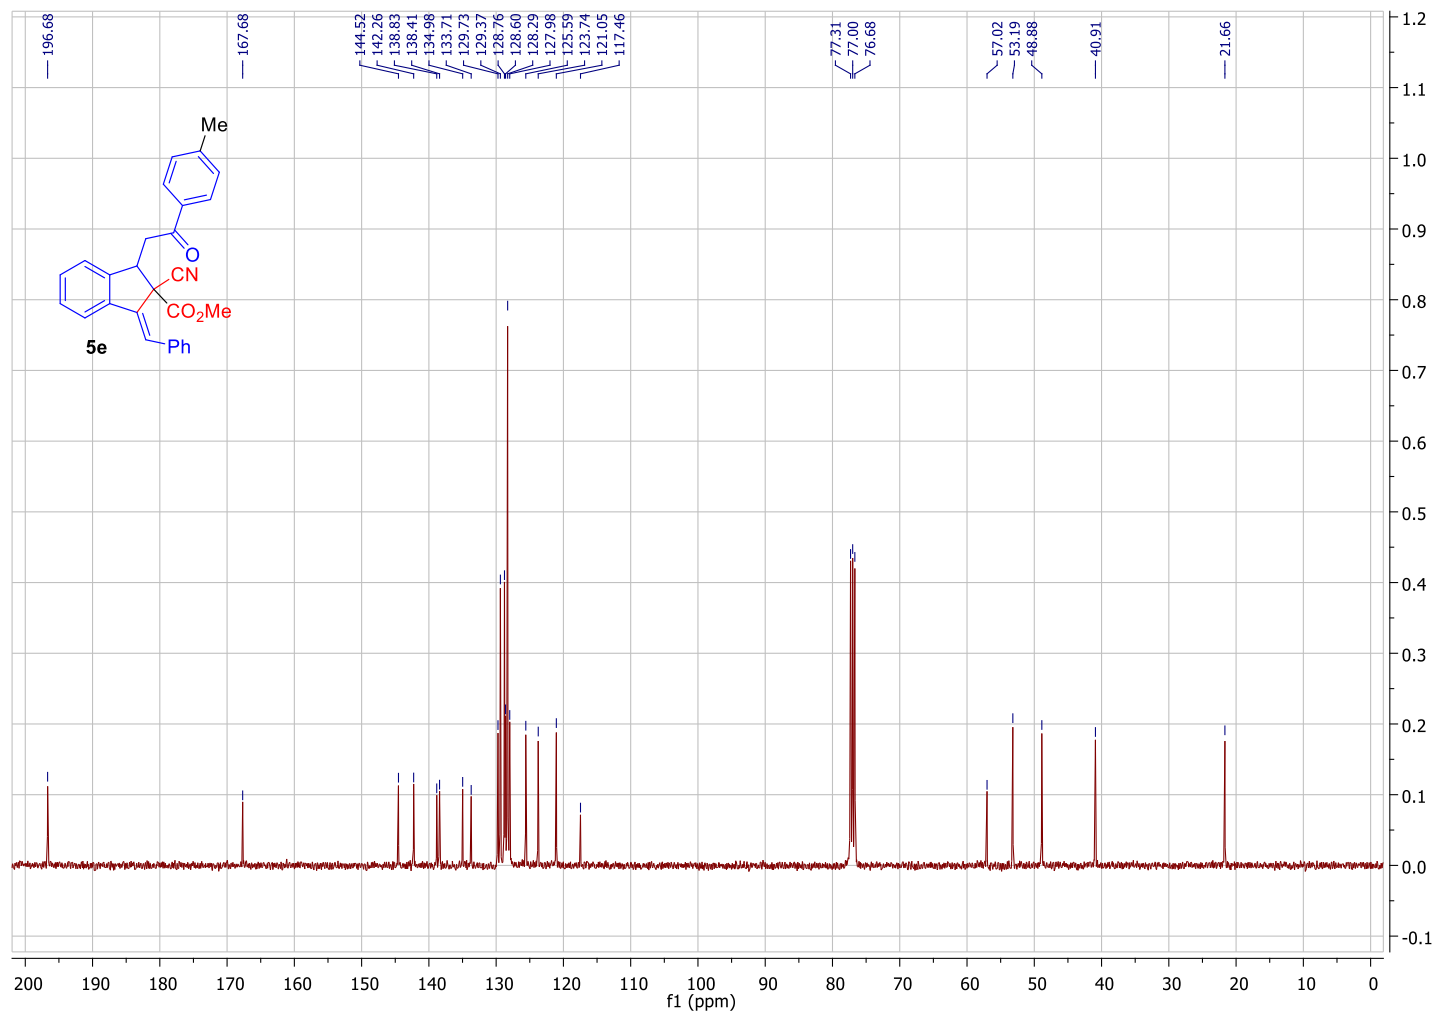

### HRMS: (5e)

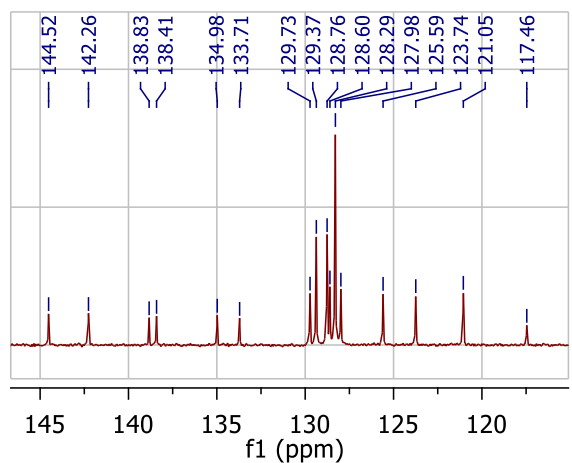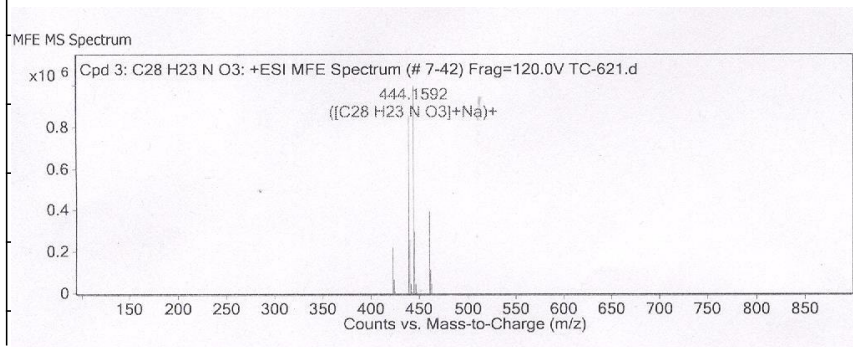

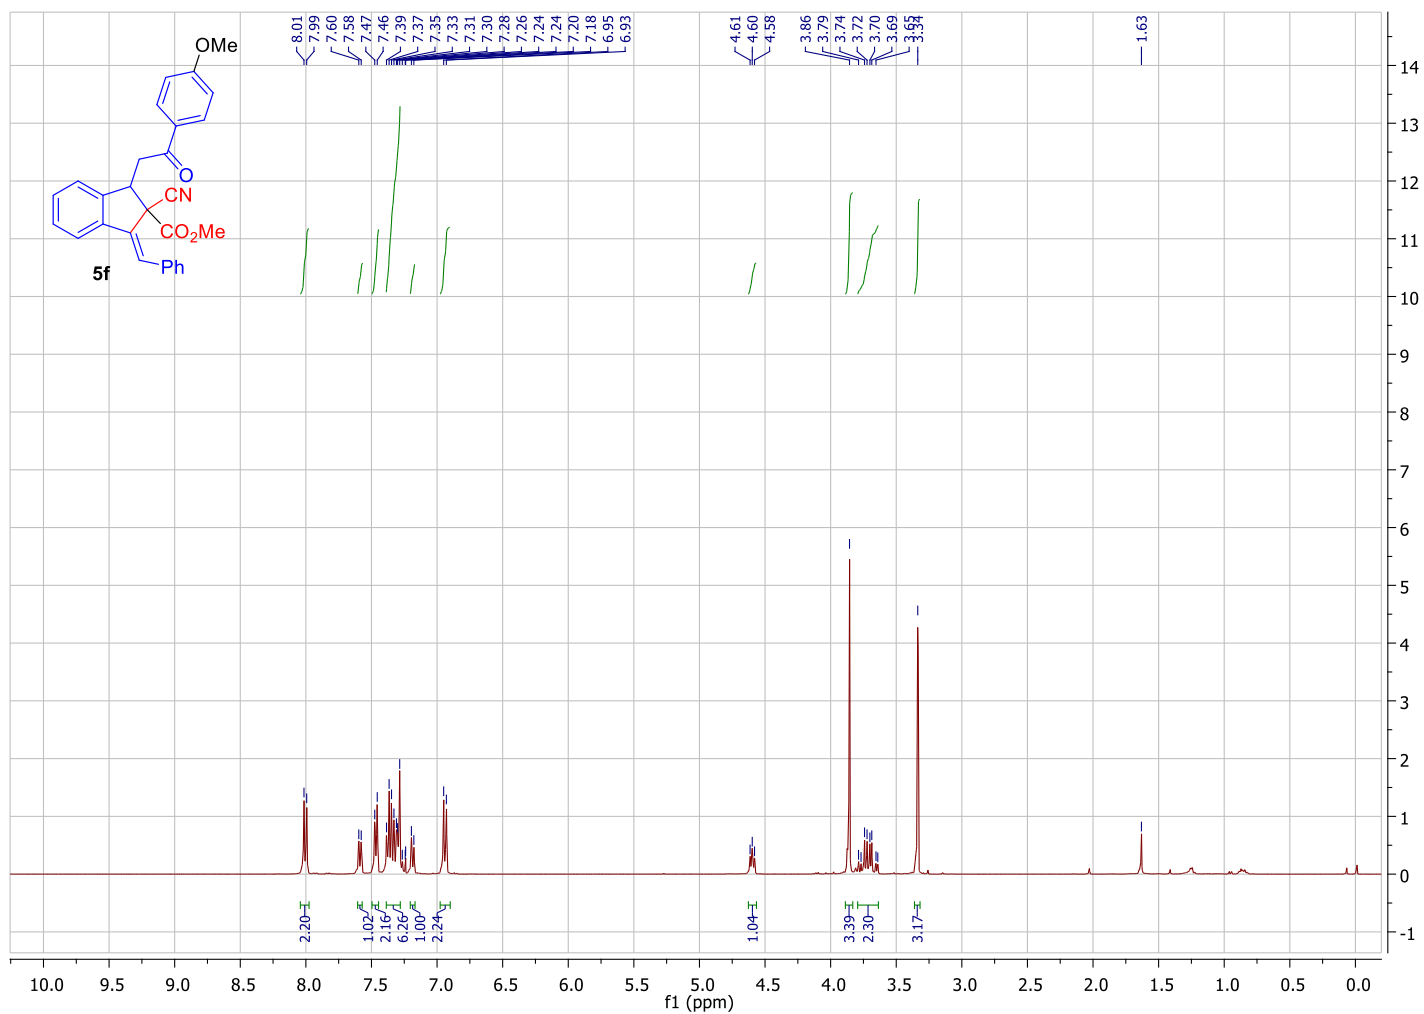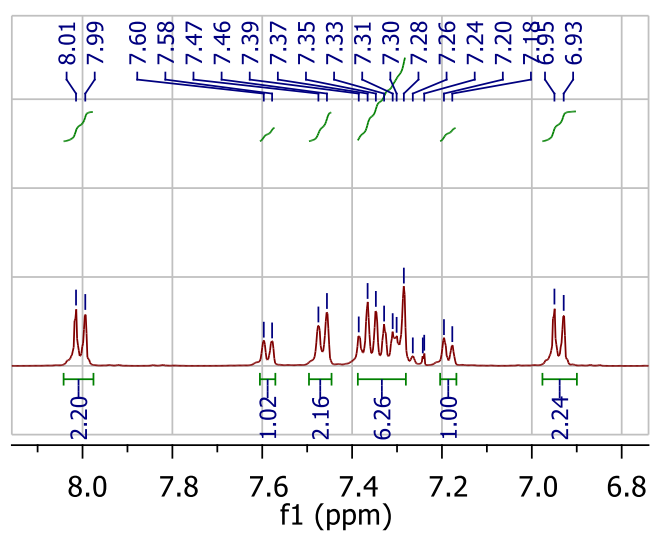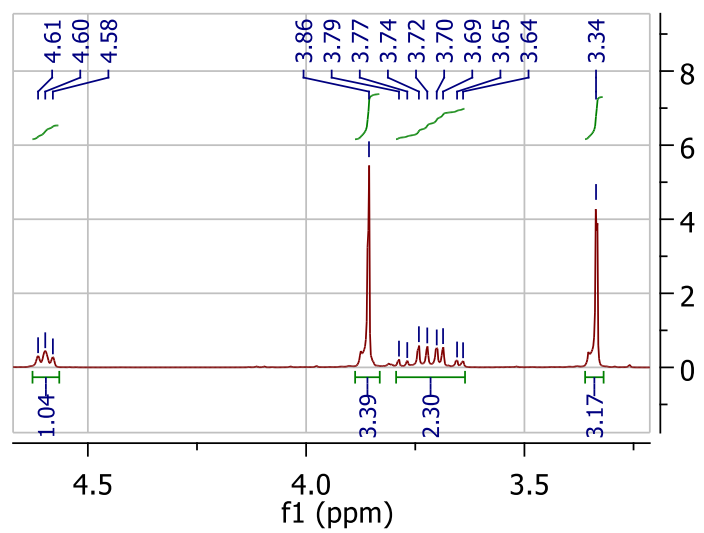

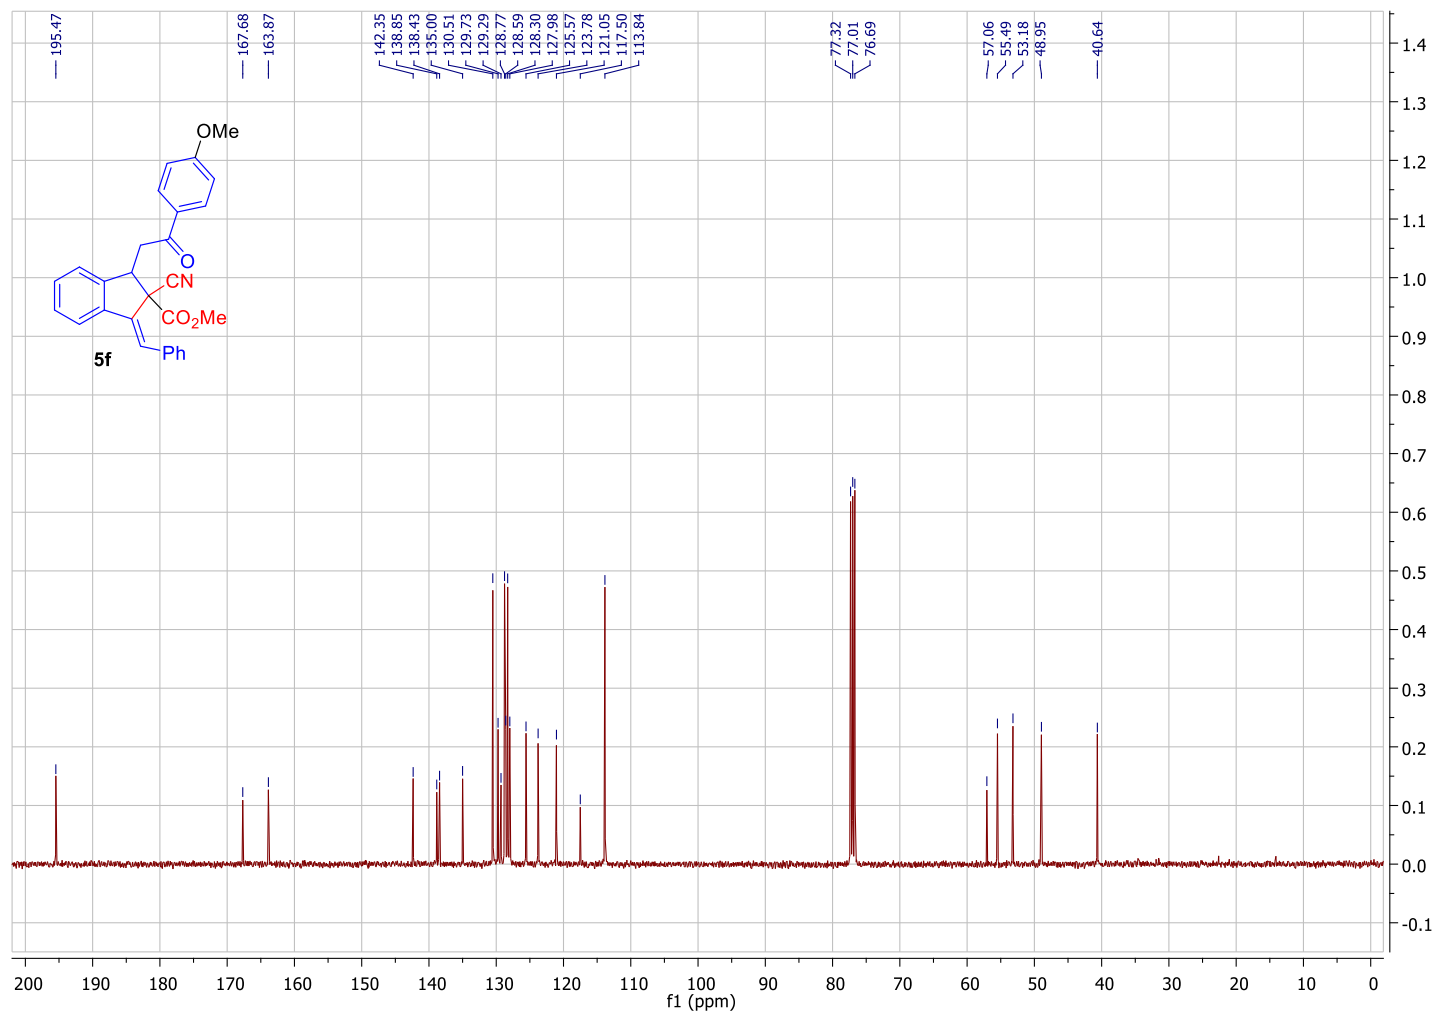

### HRMS: (5f)

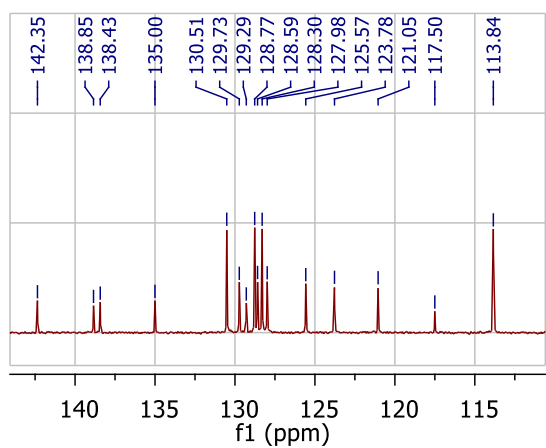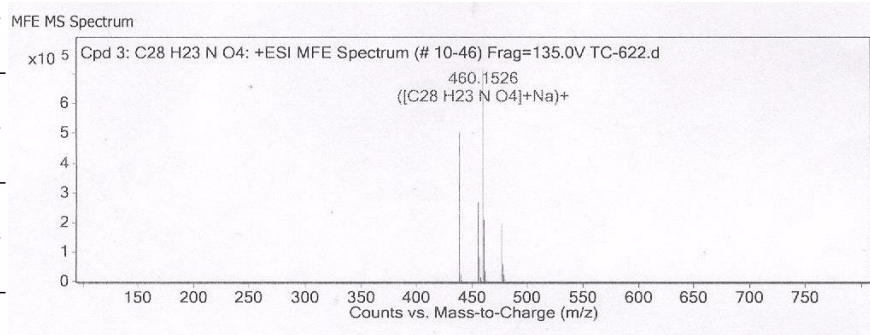

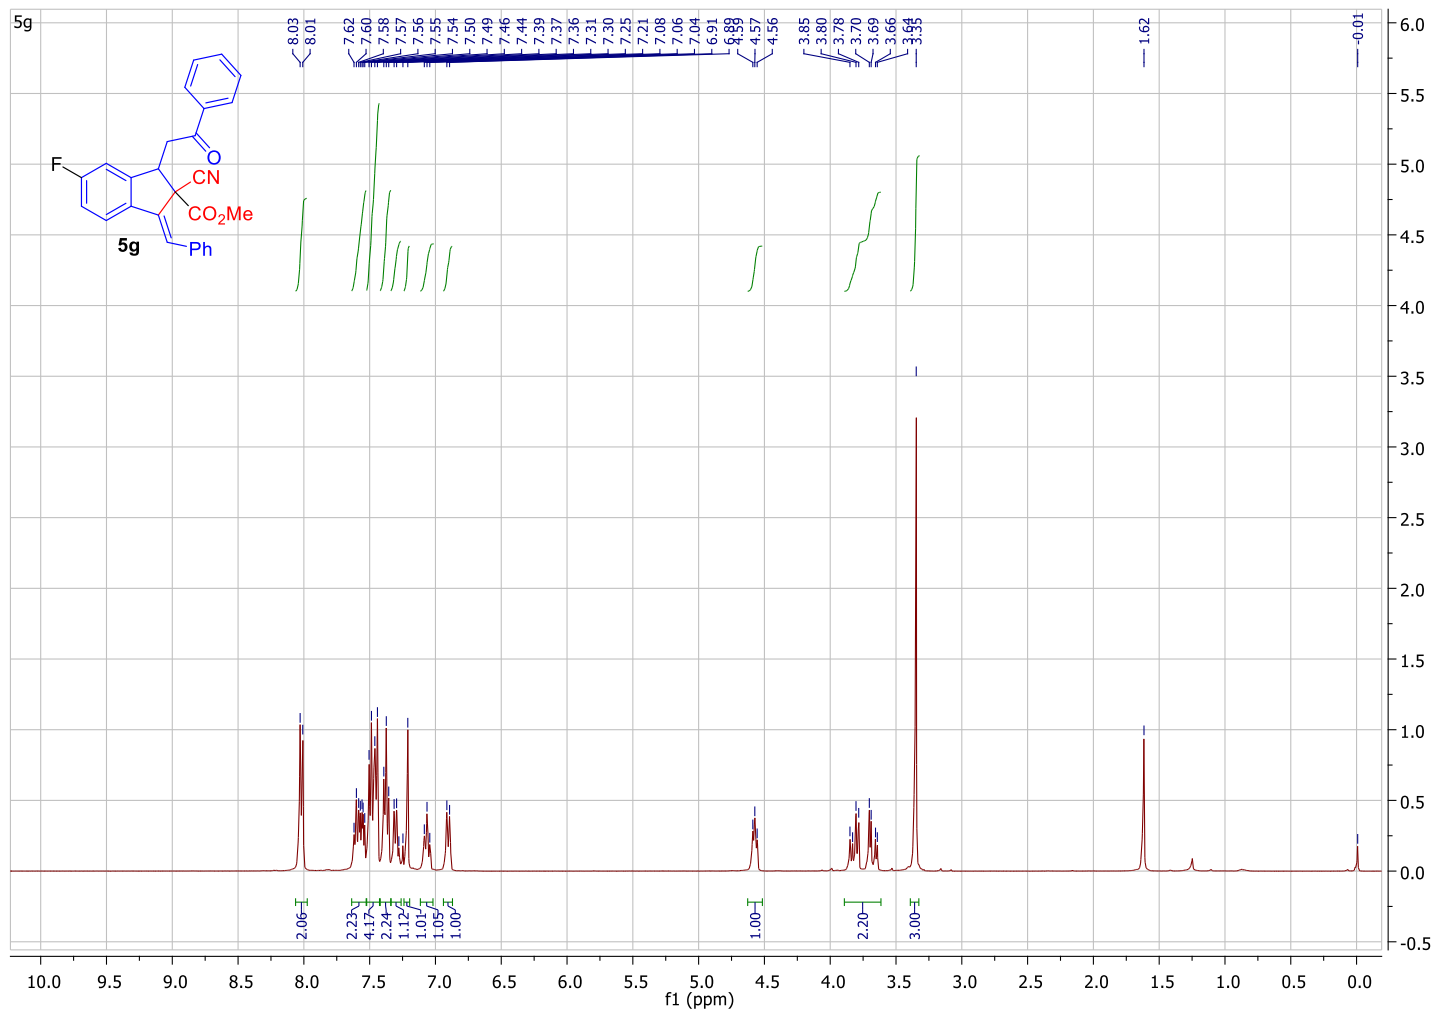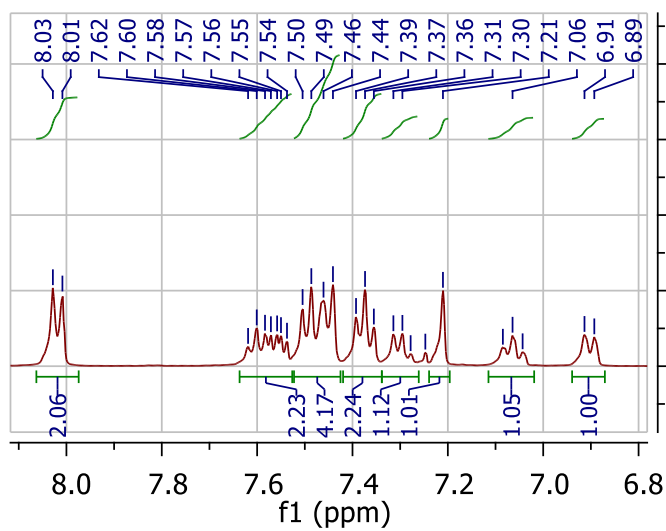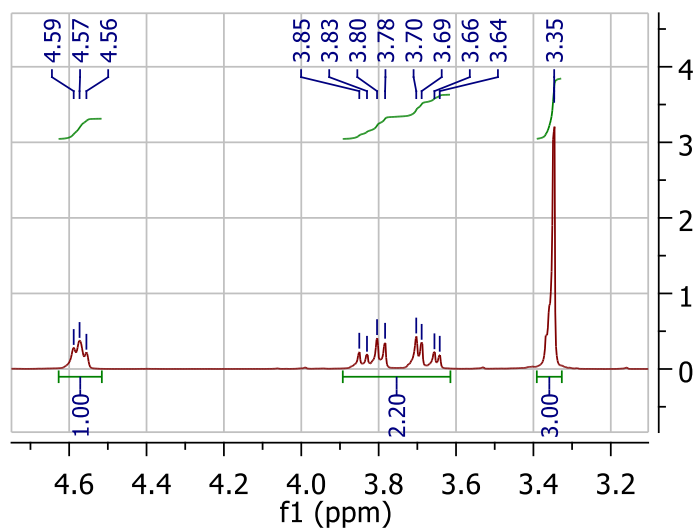



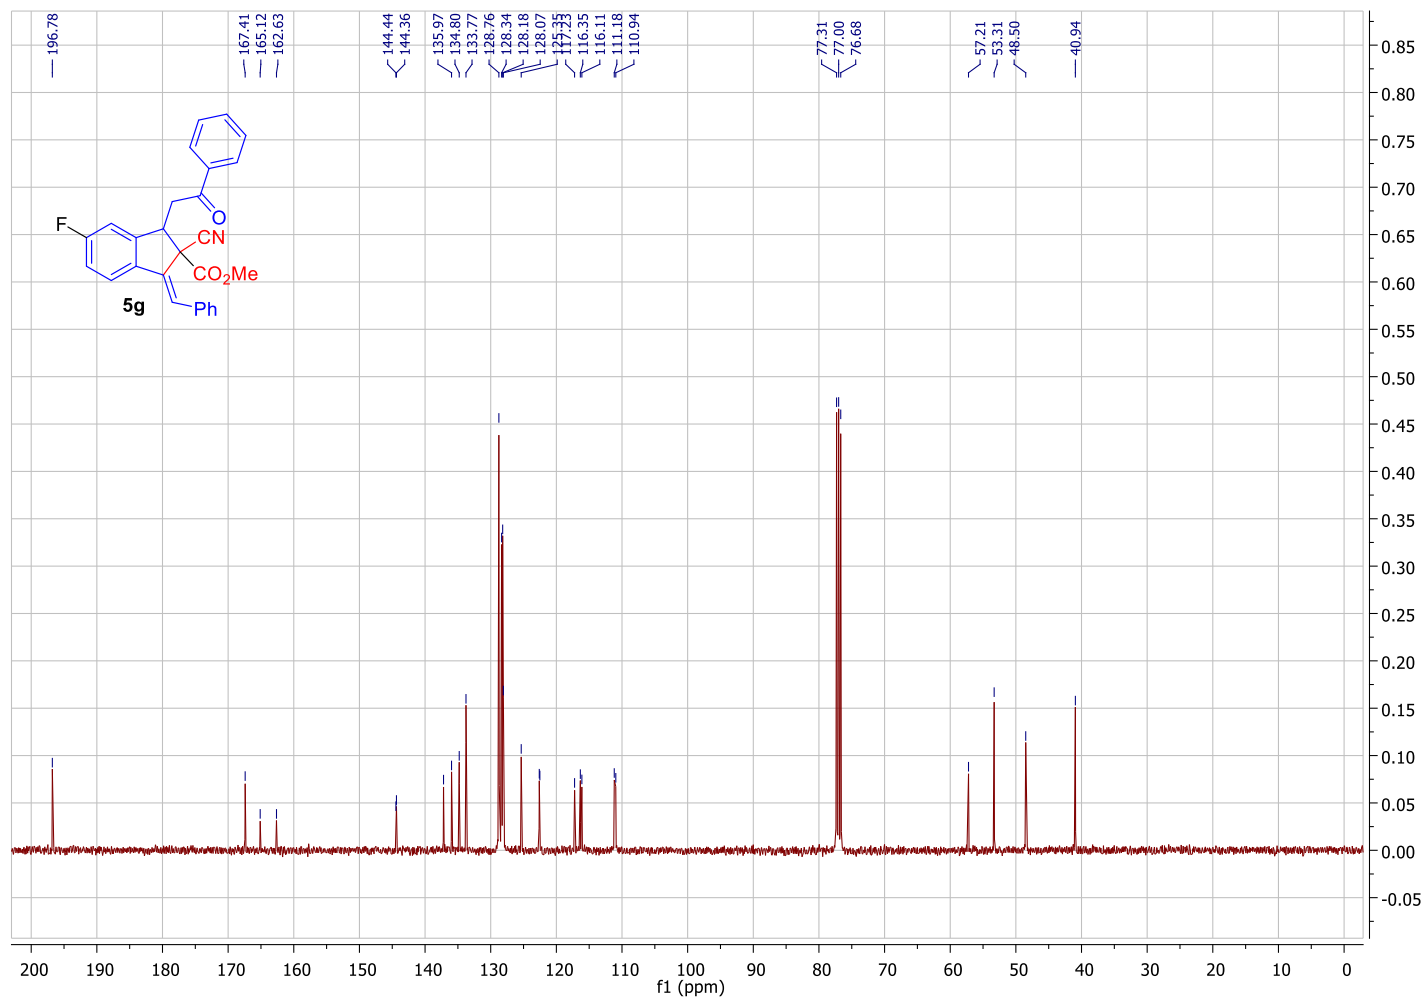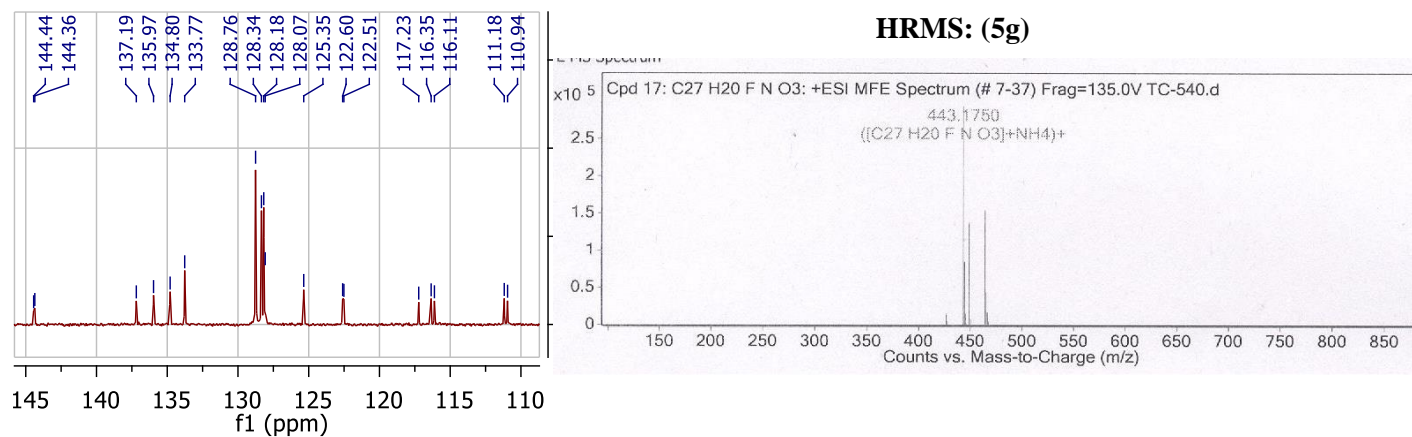

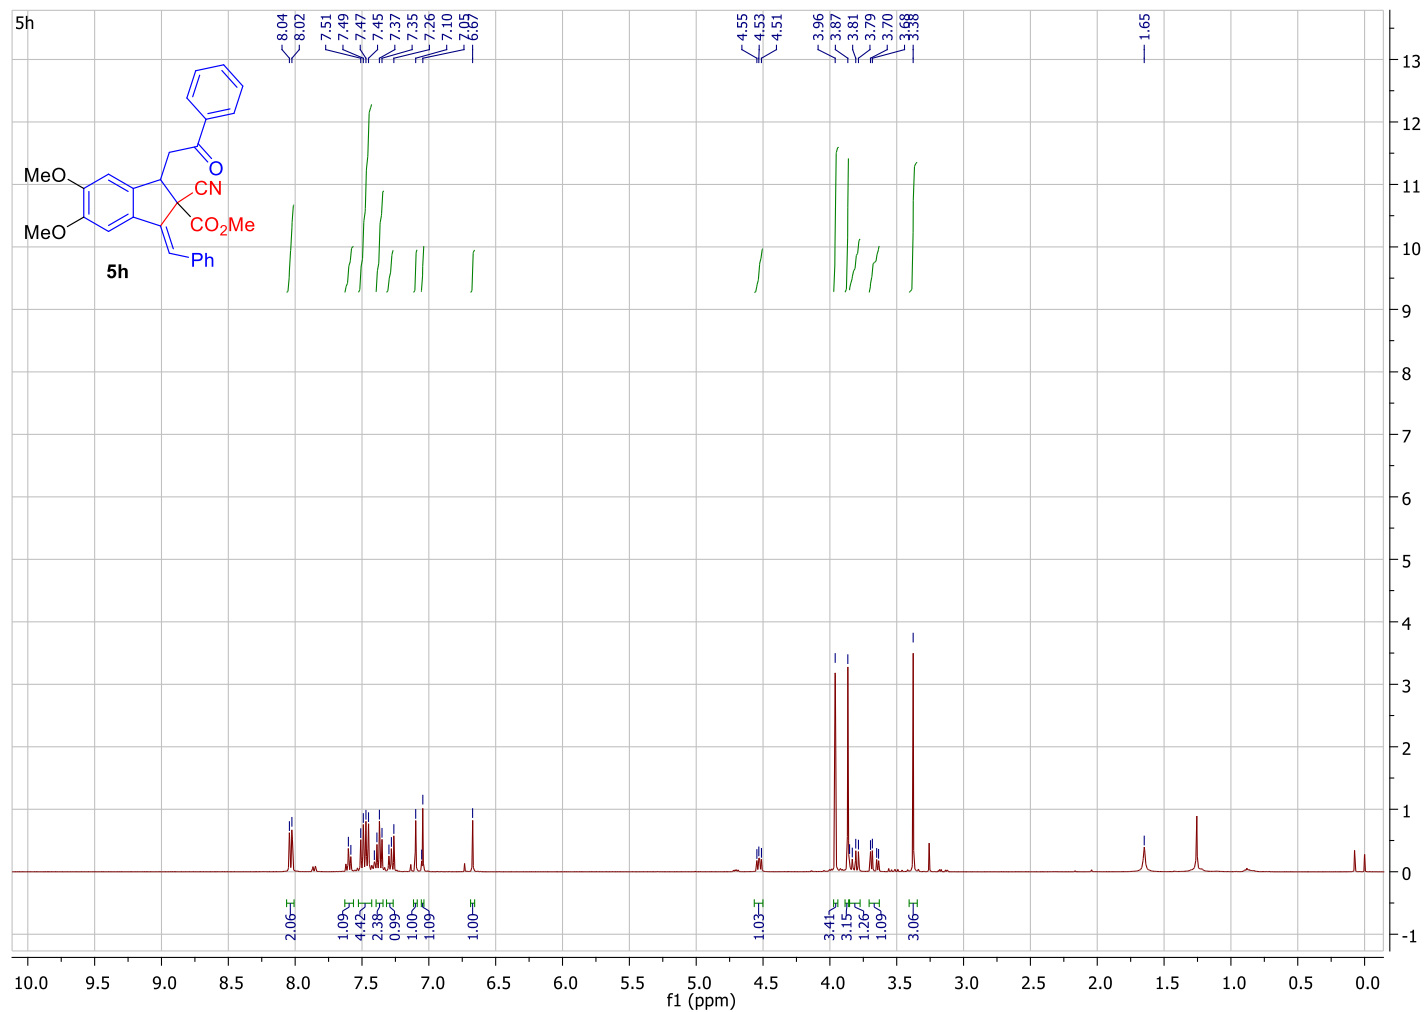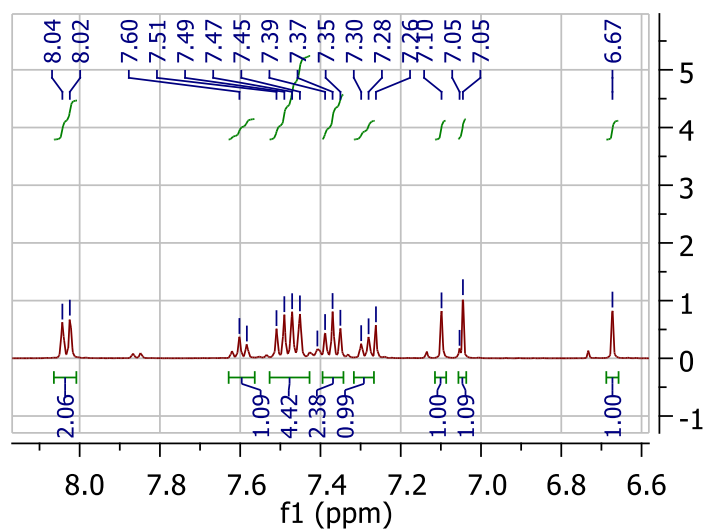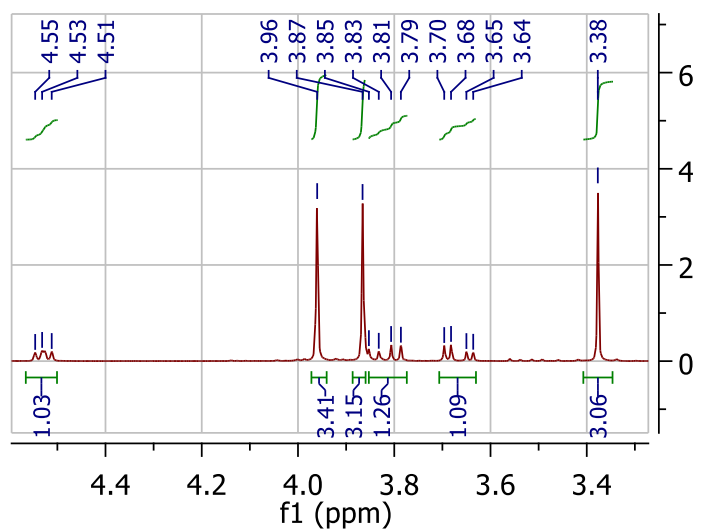

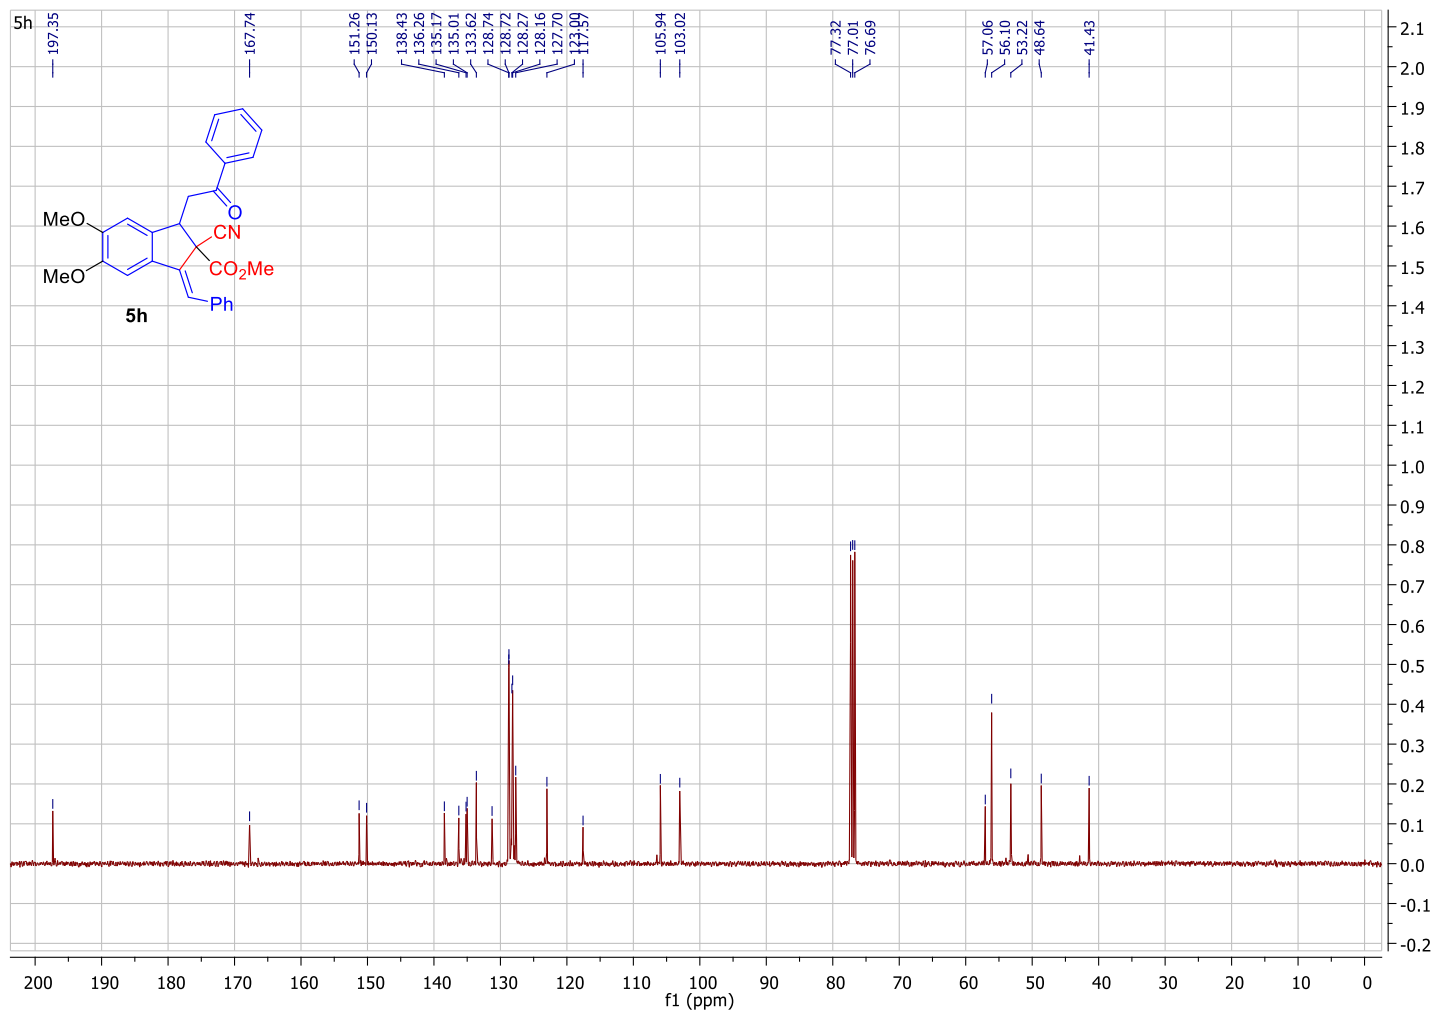

### HRMS: (5h)

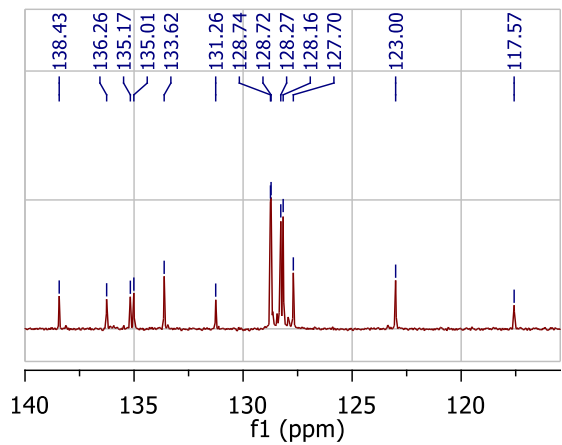

#### MFE MS Spectrum

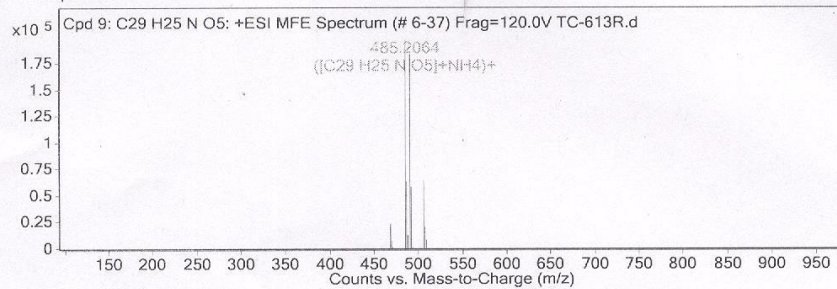

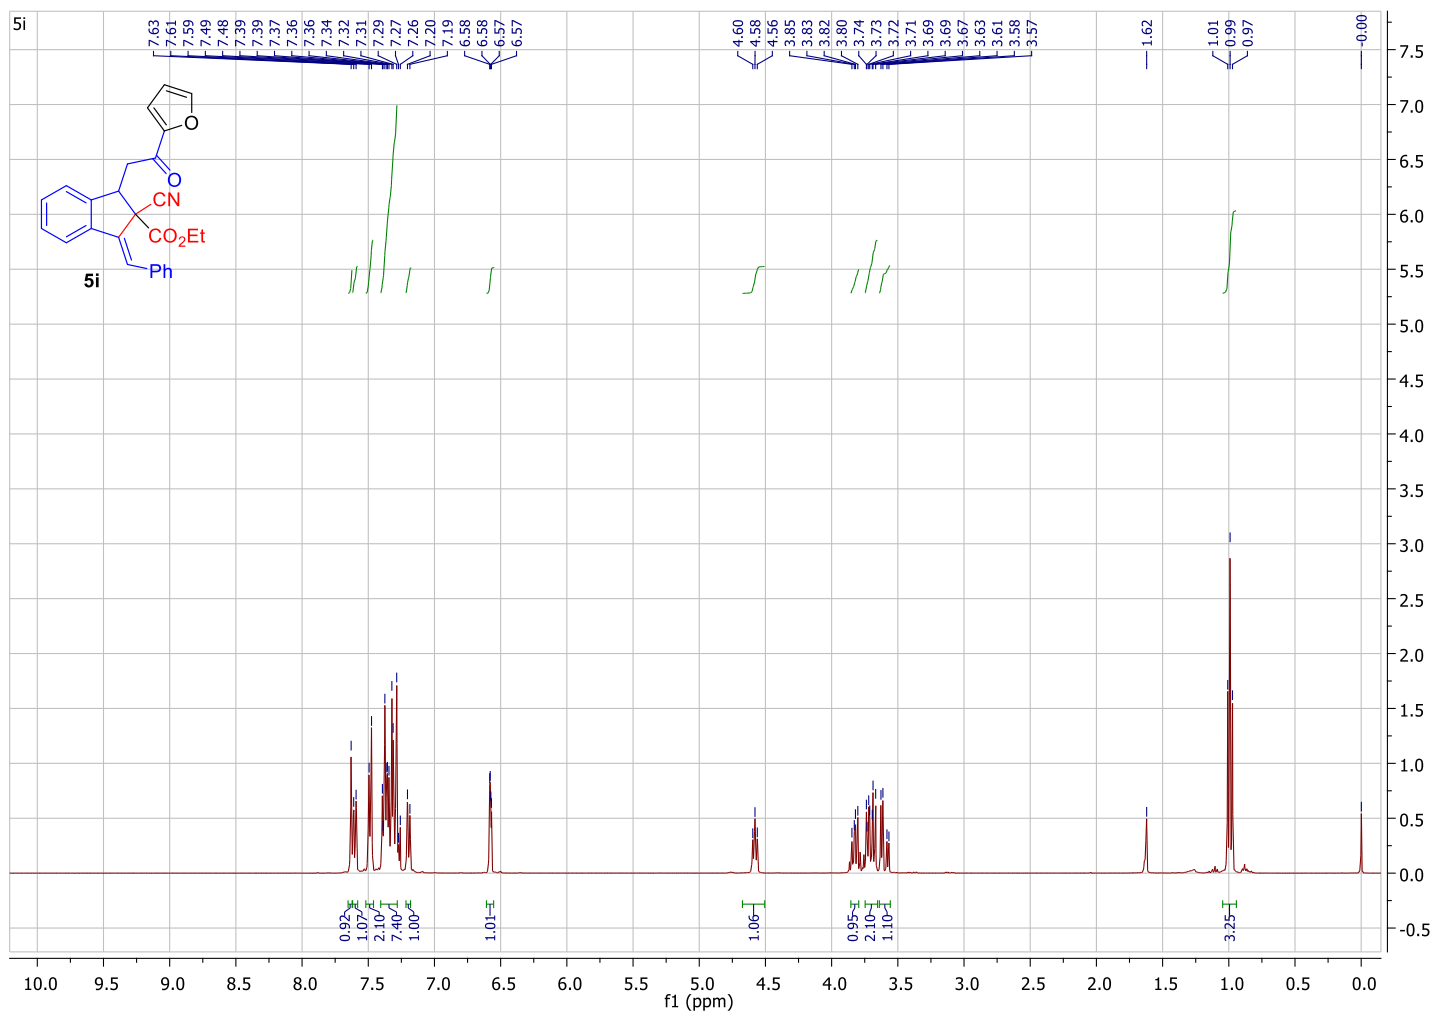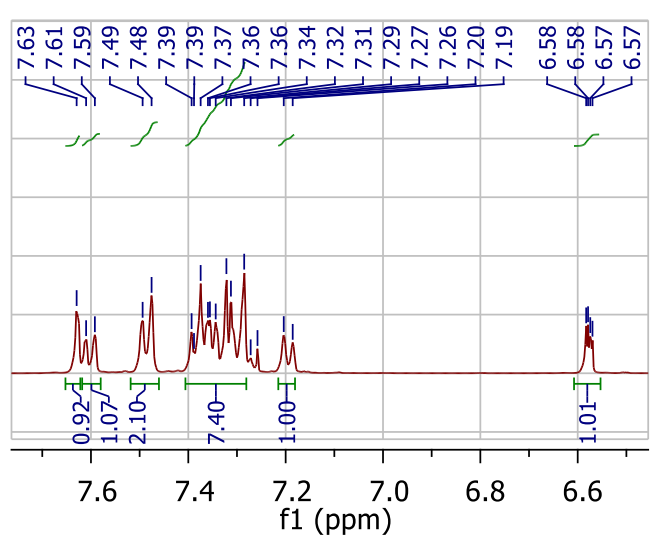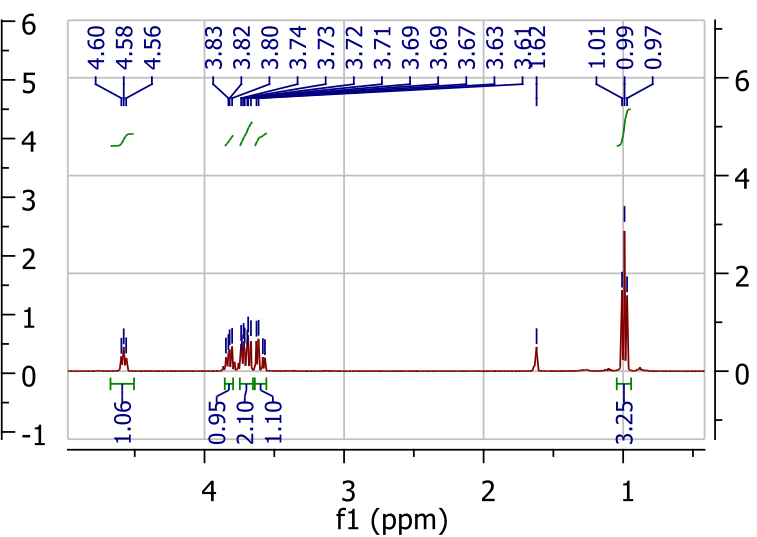

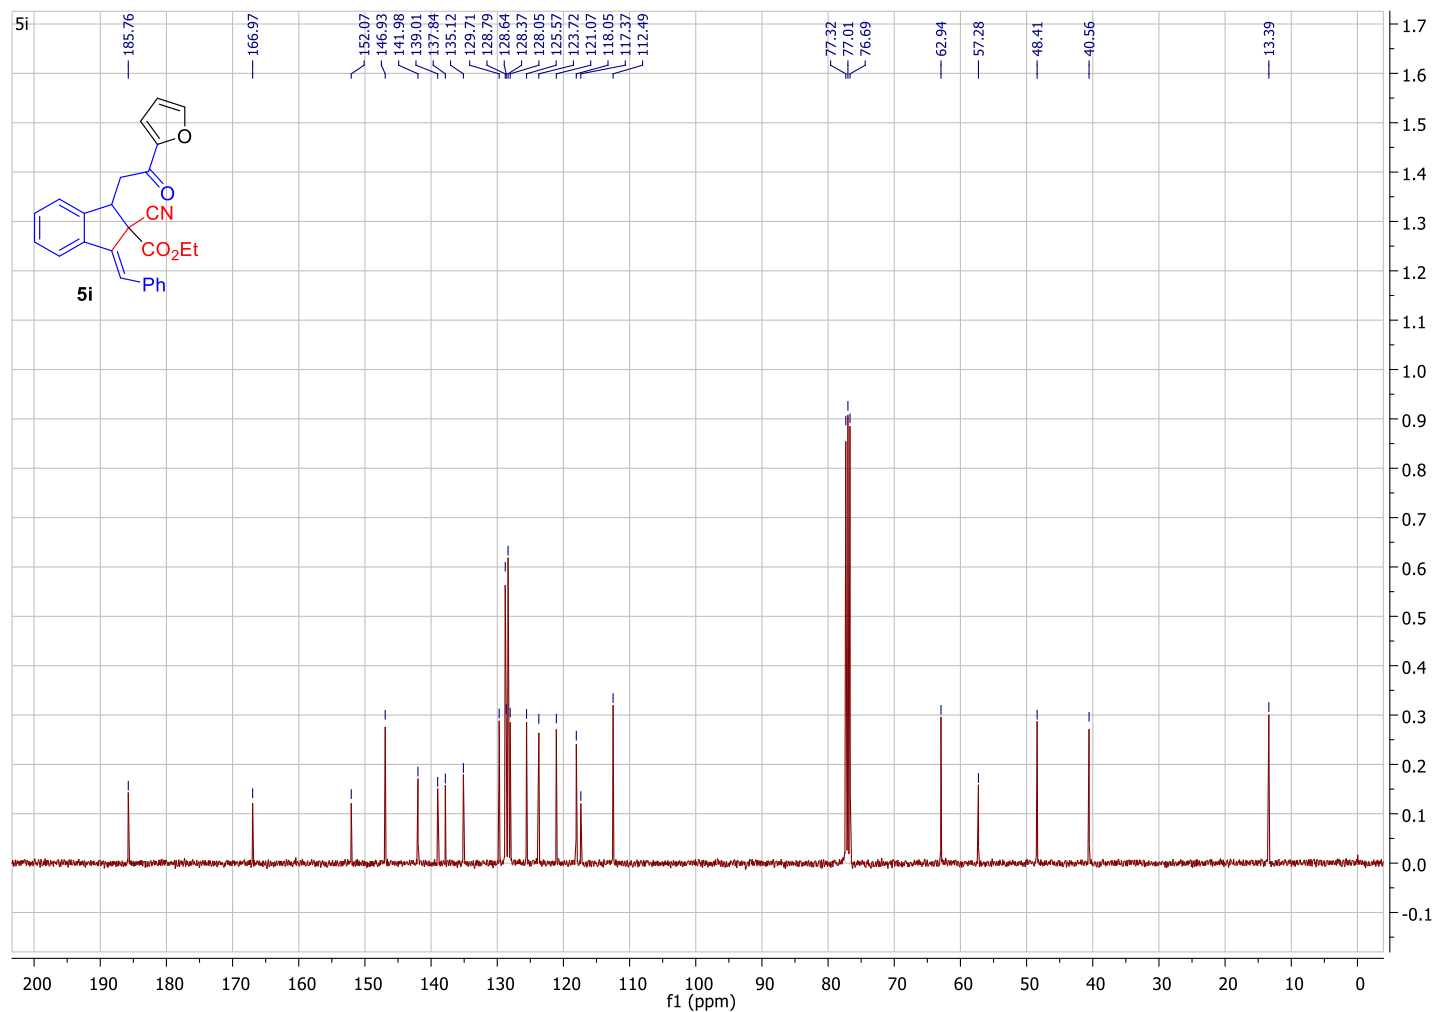

**HRMS: (5i)**

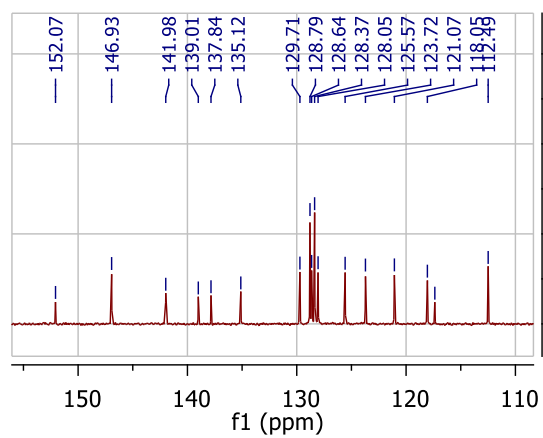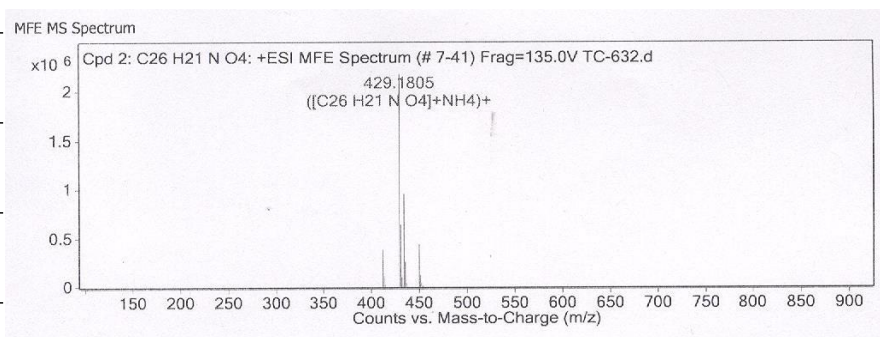

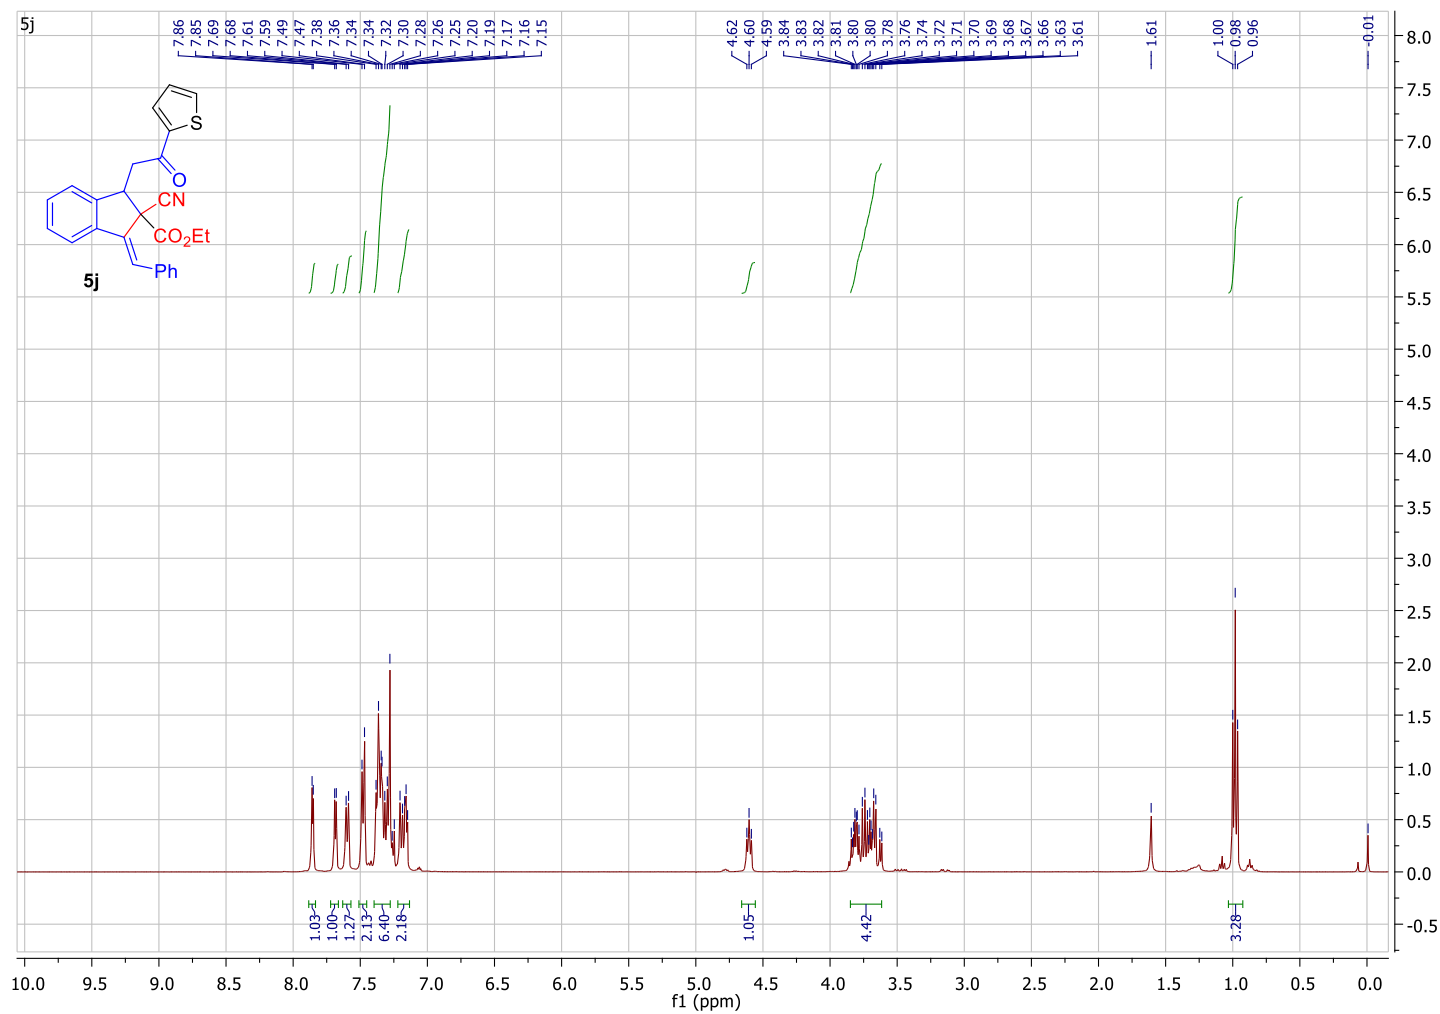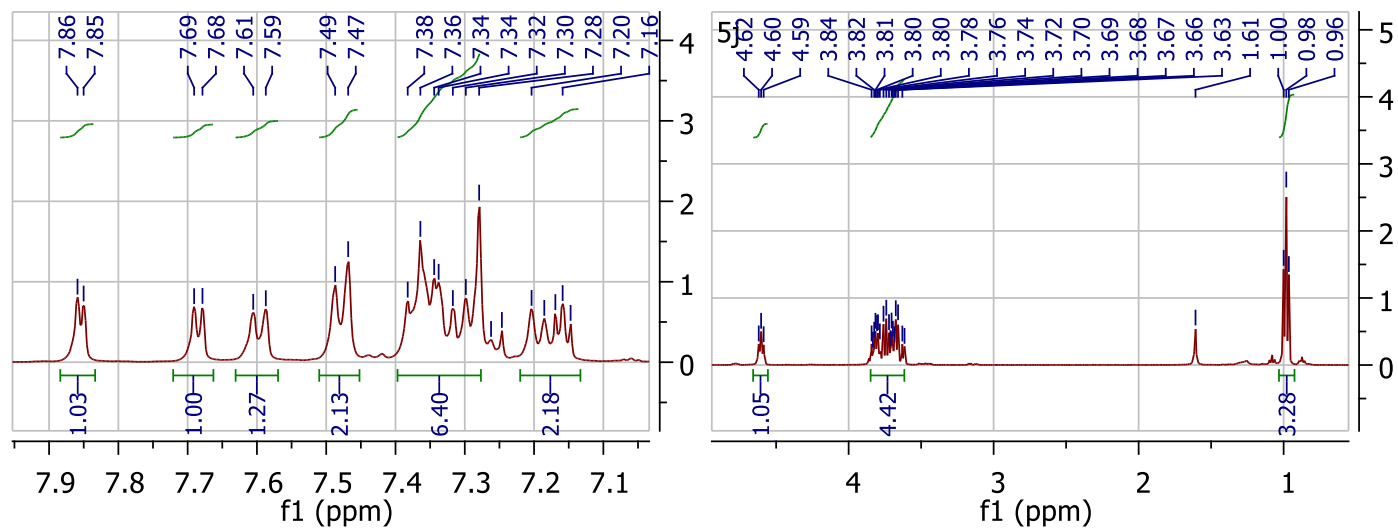

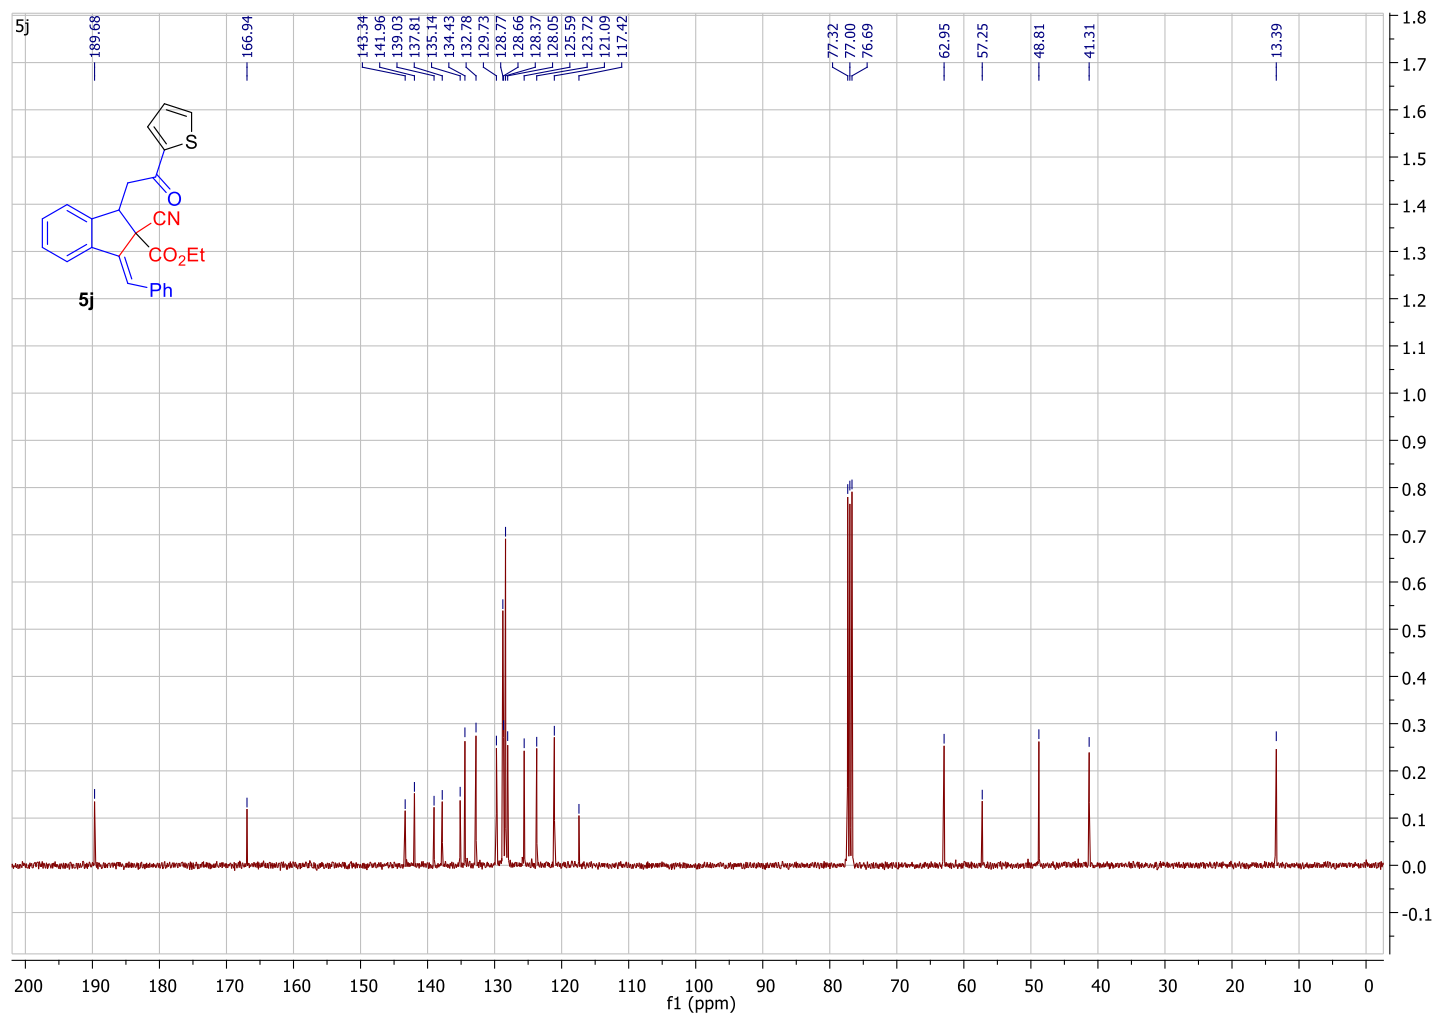

### HRMS: (5j)

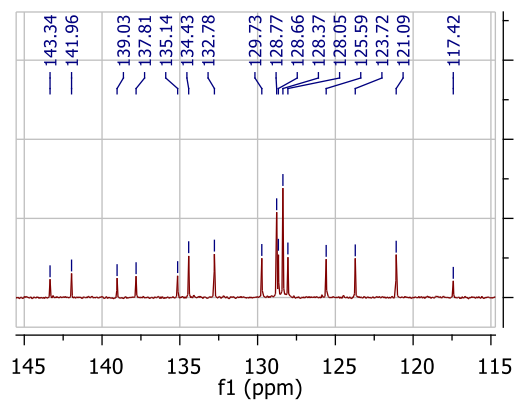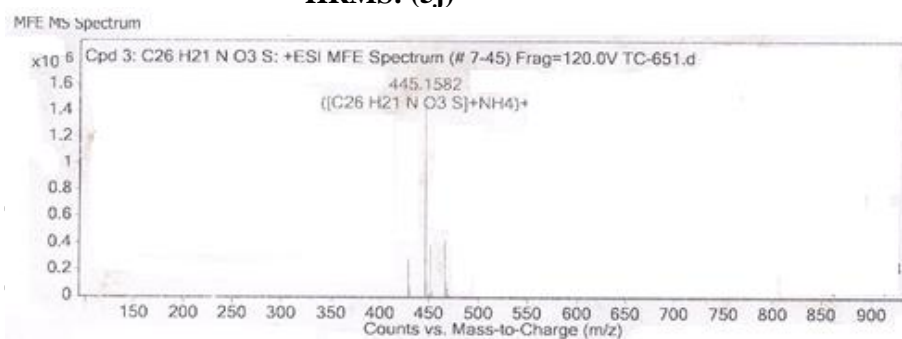

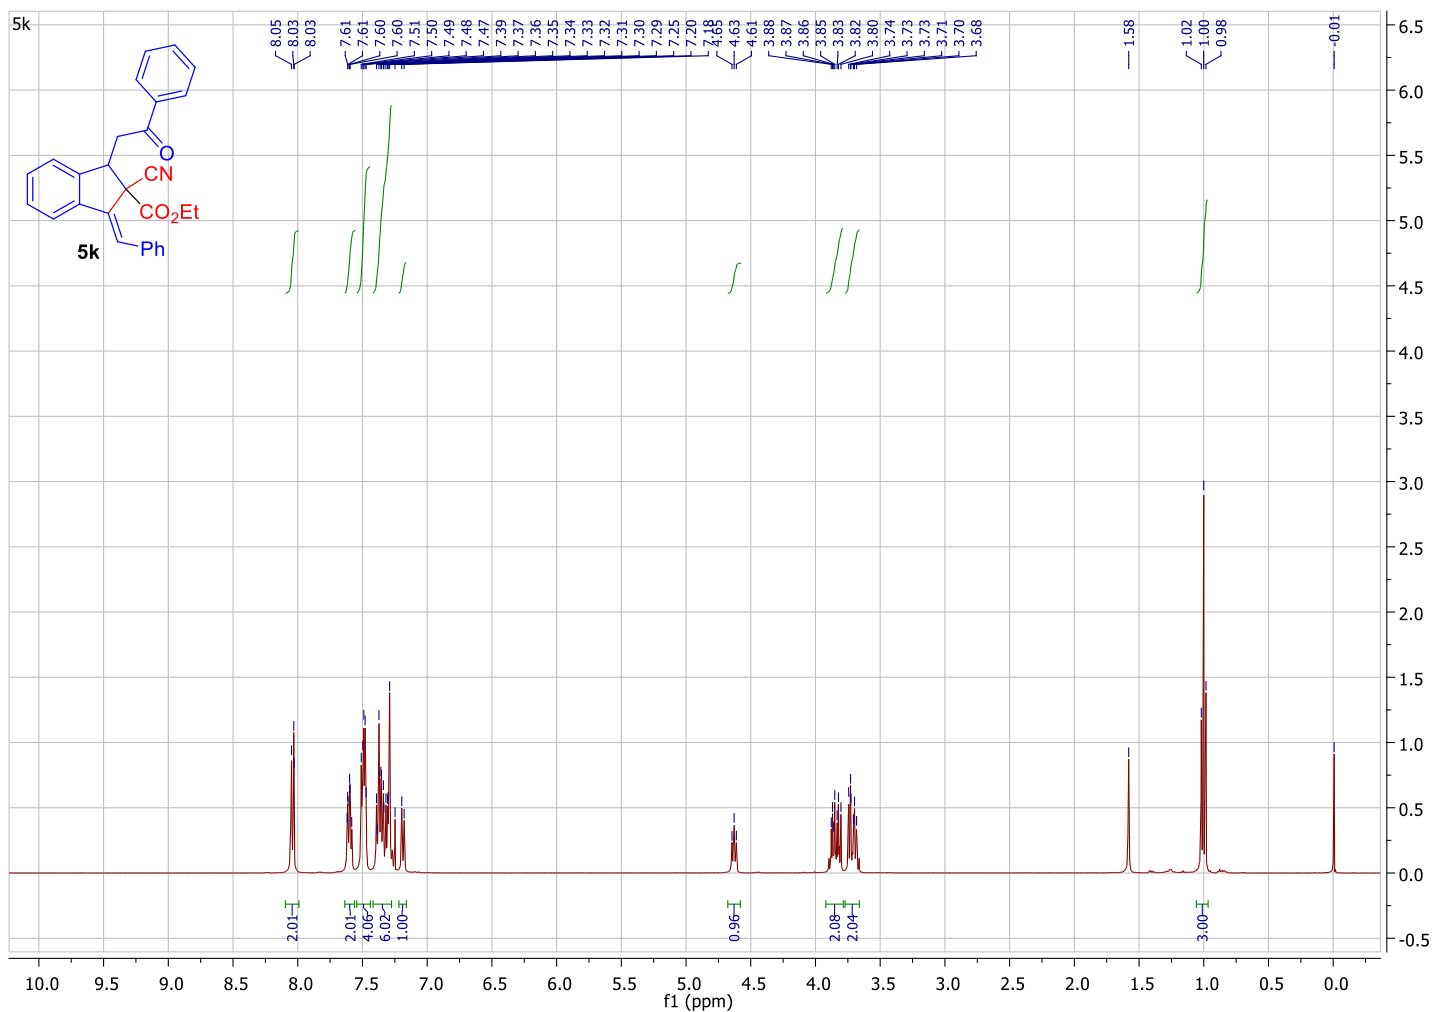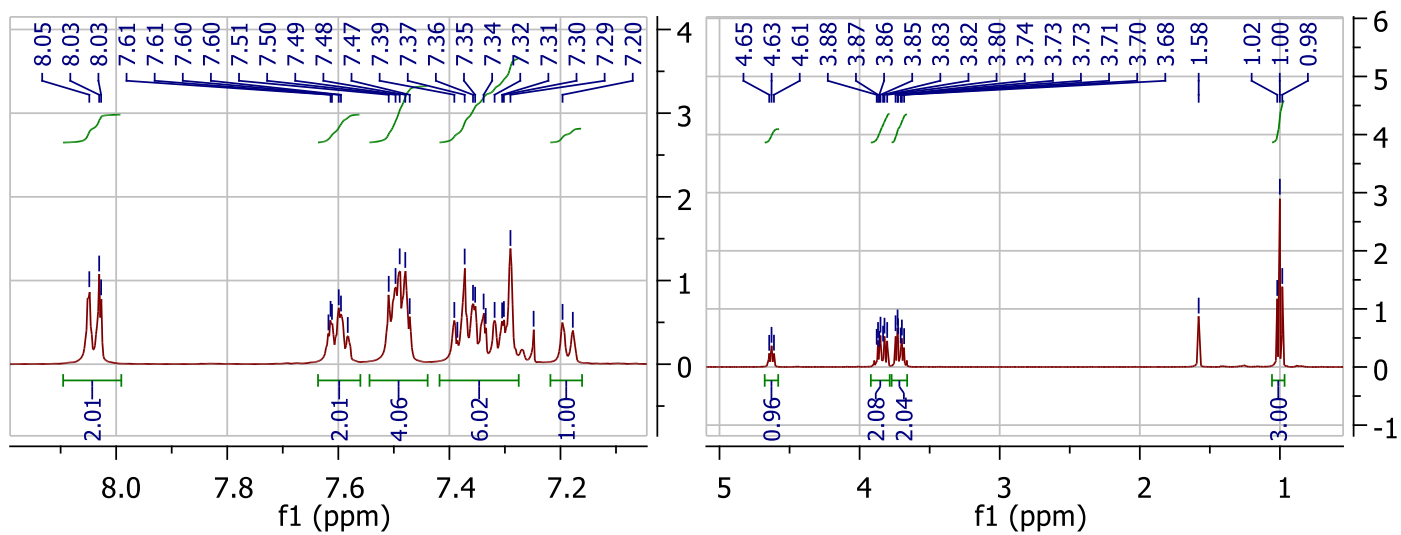



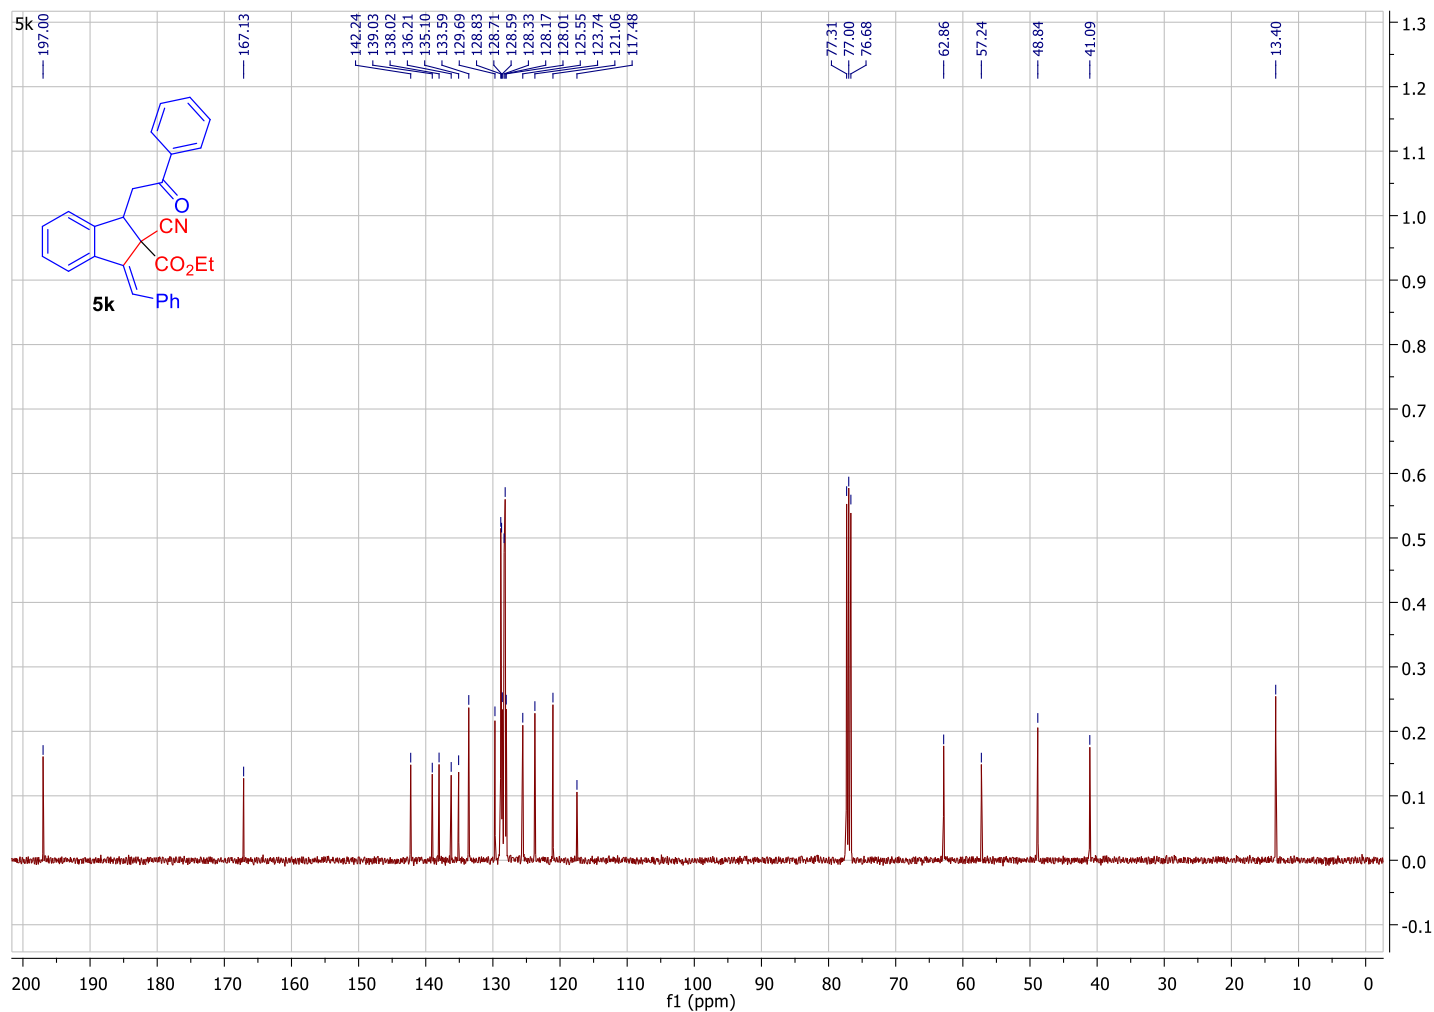

### HRMS: (5k)

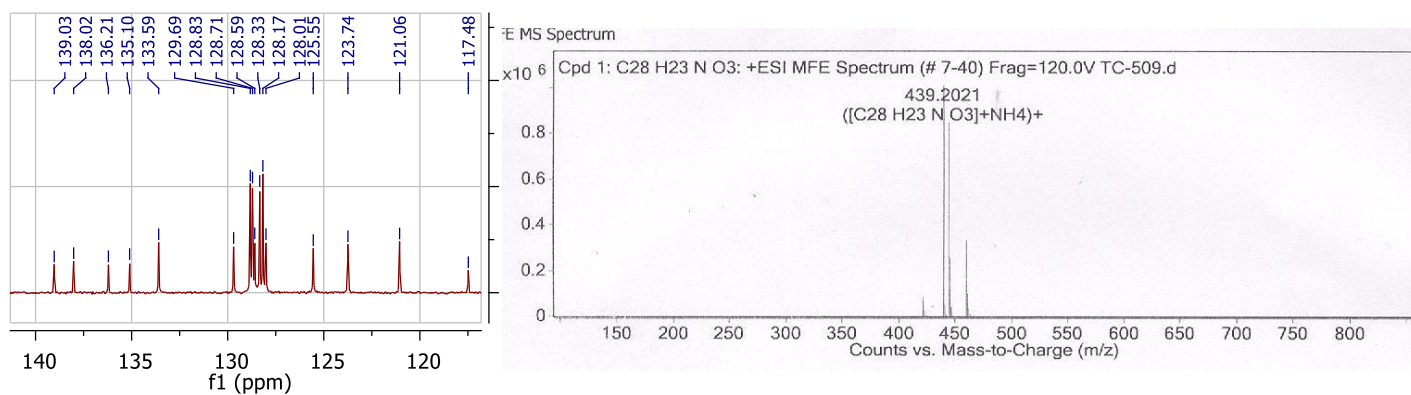

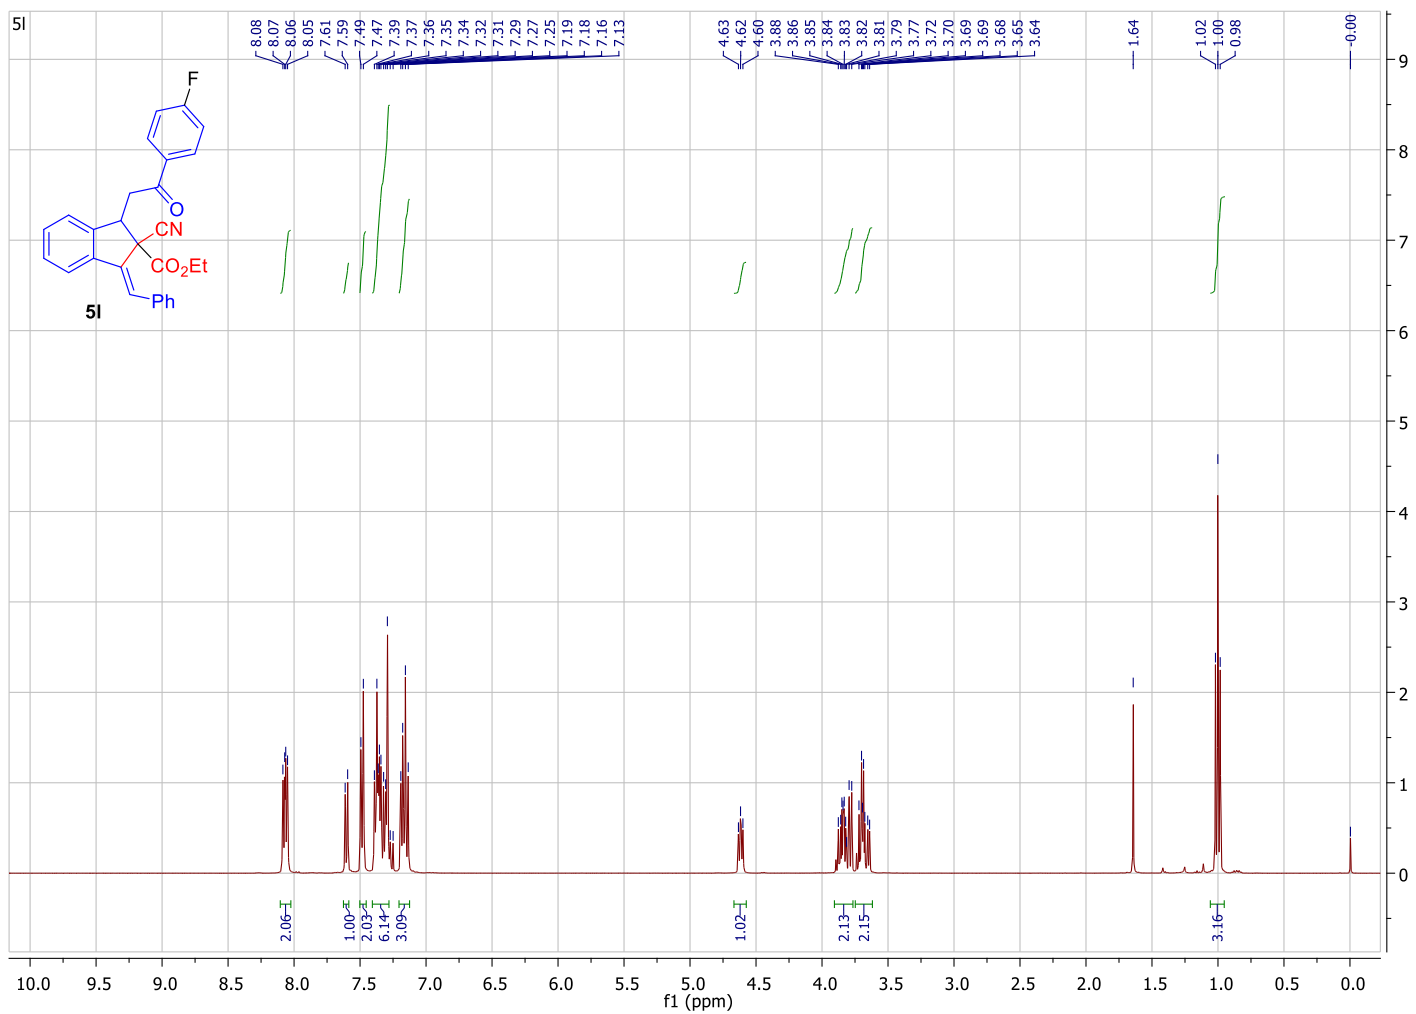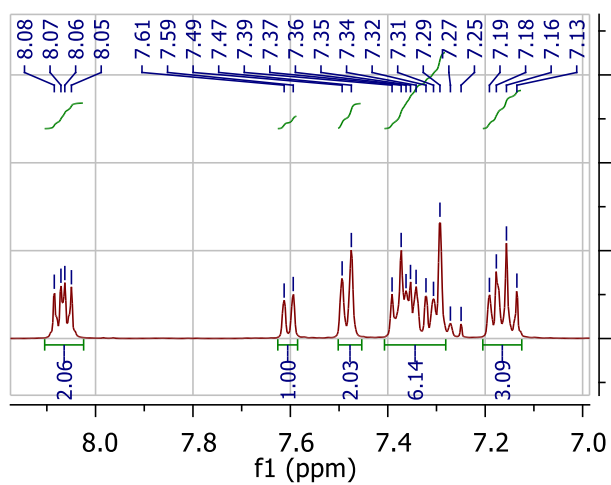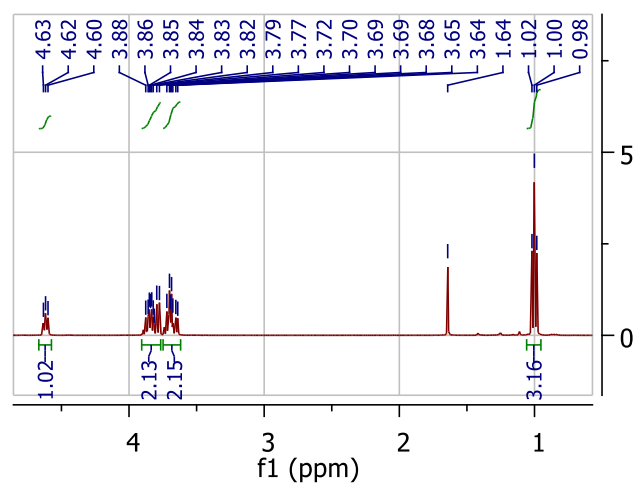

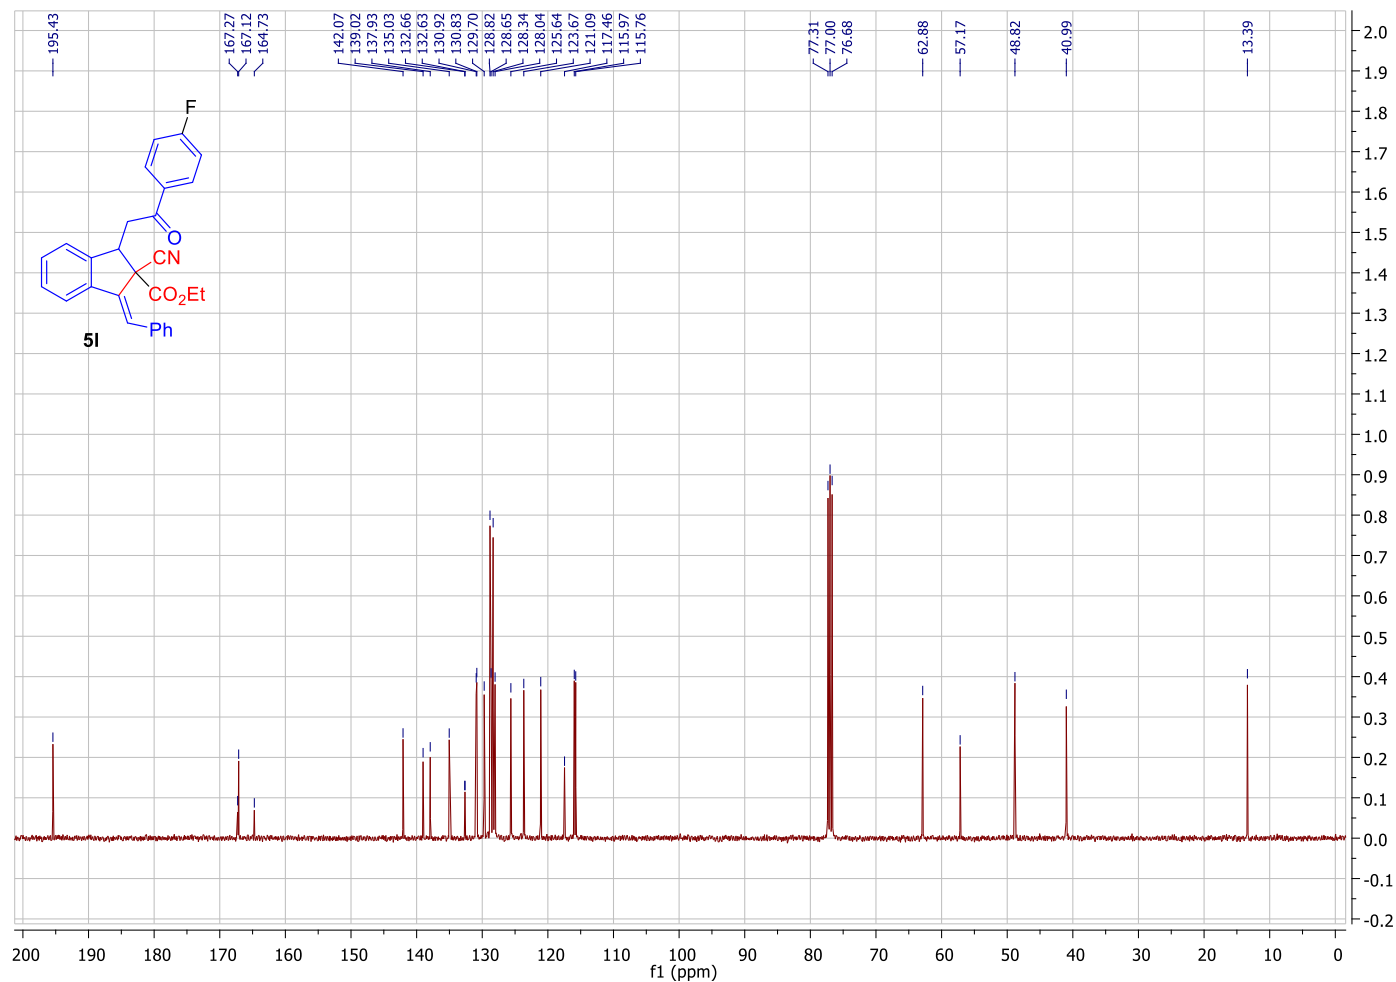

### HRMS: (51)

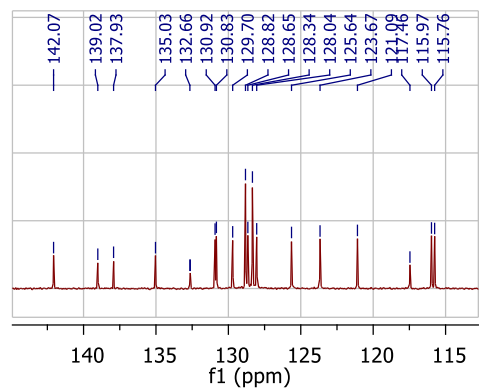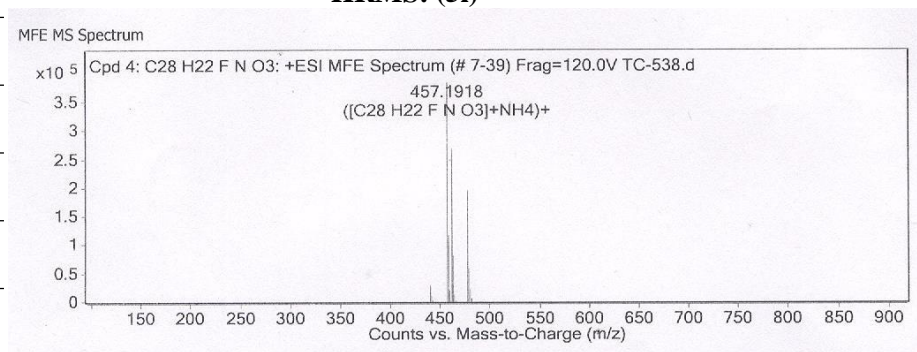

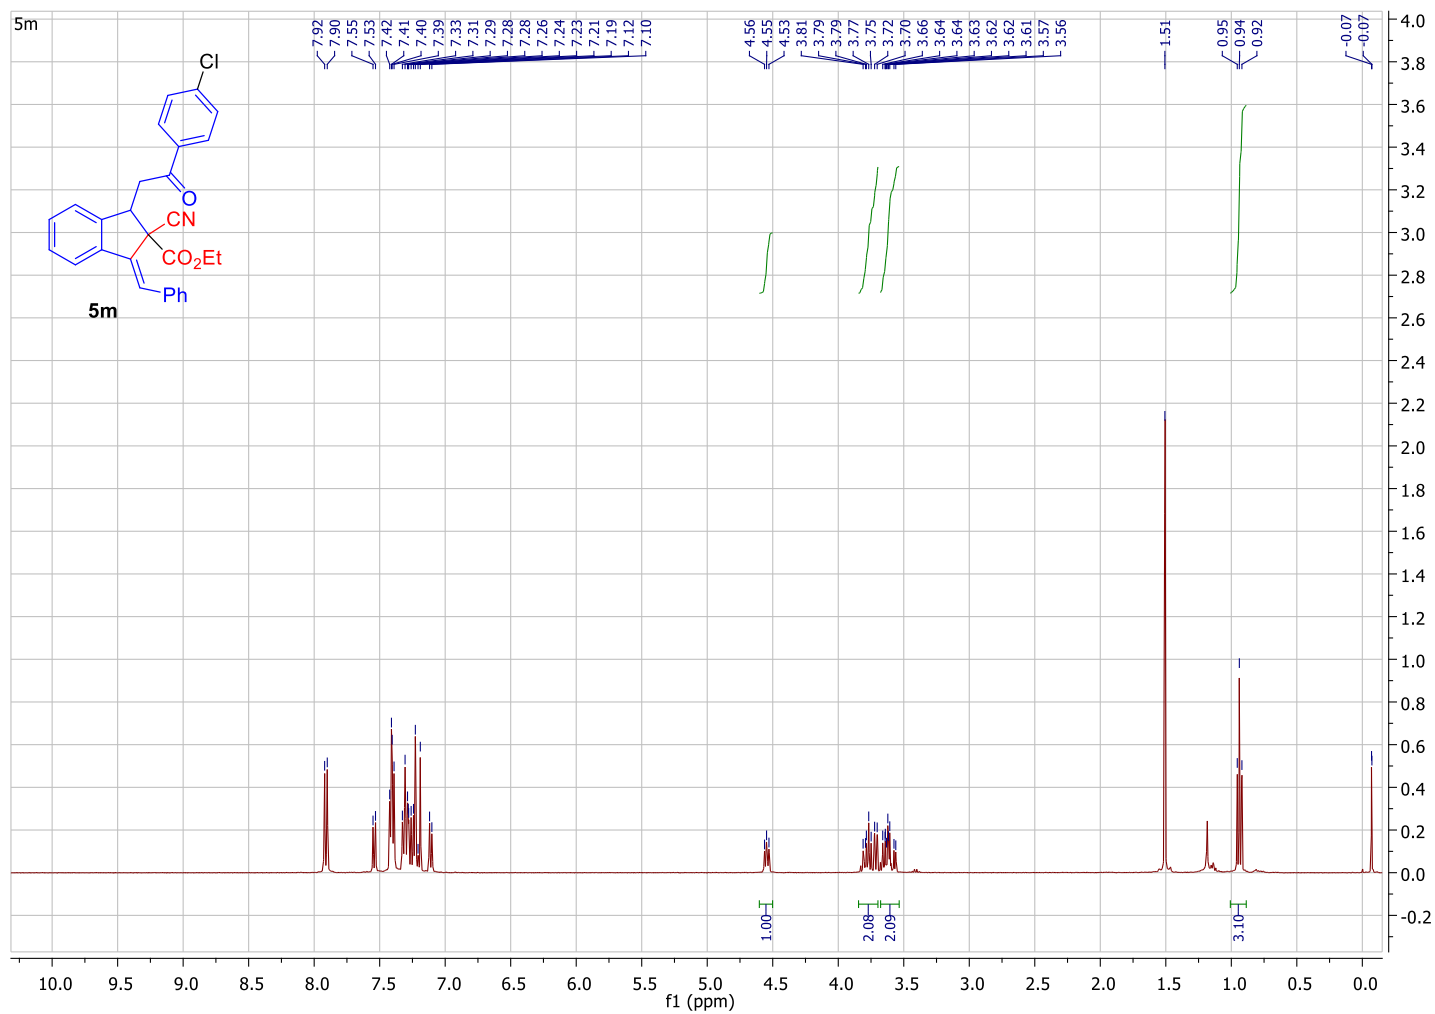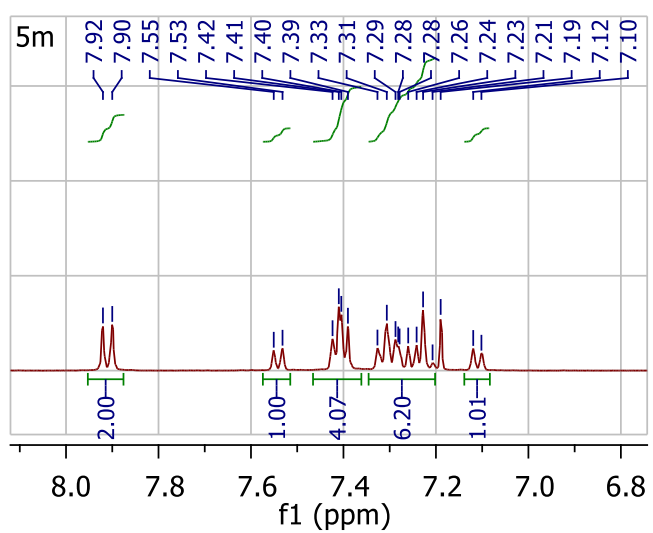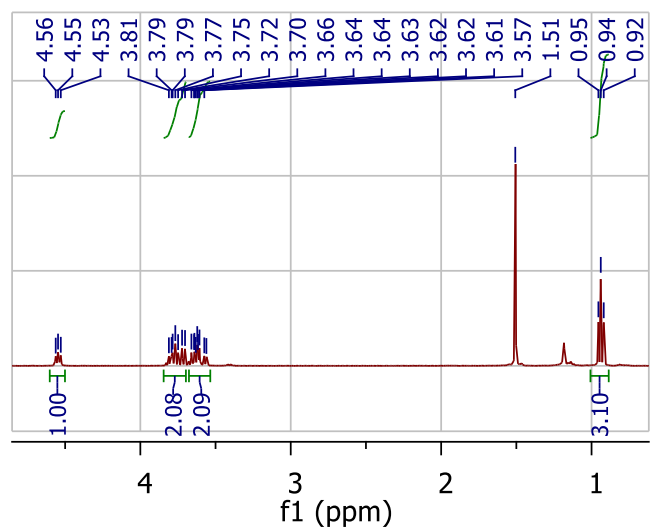

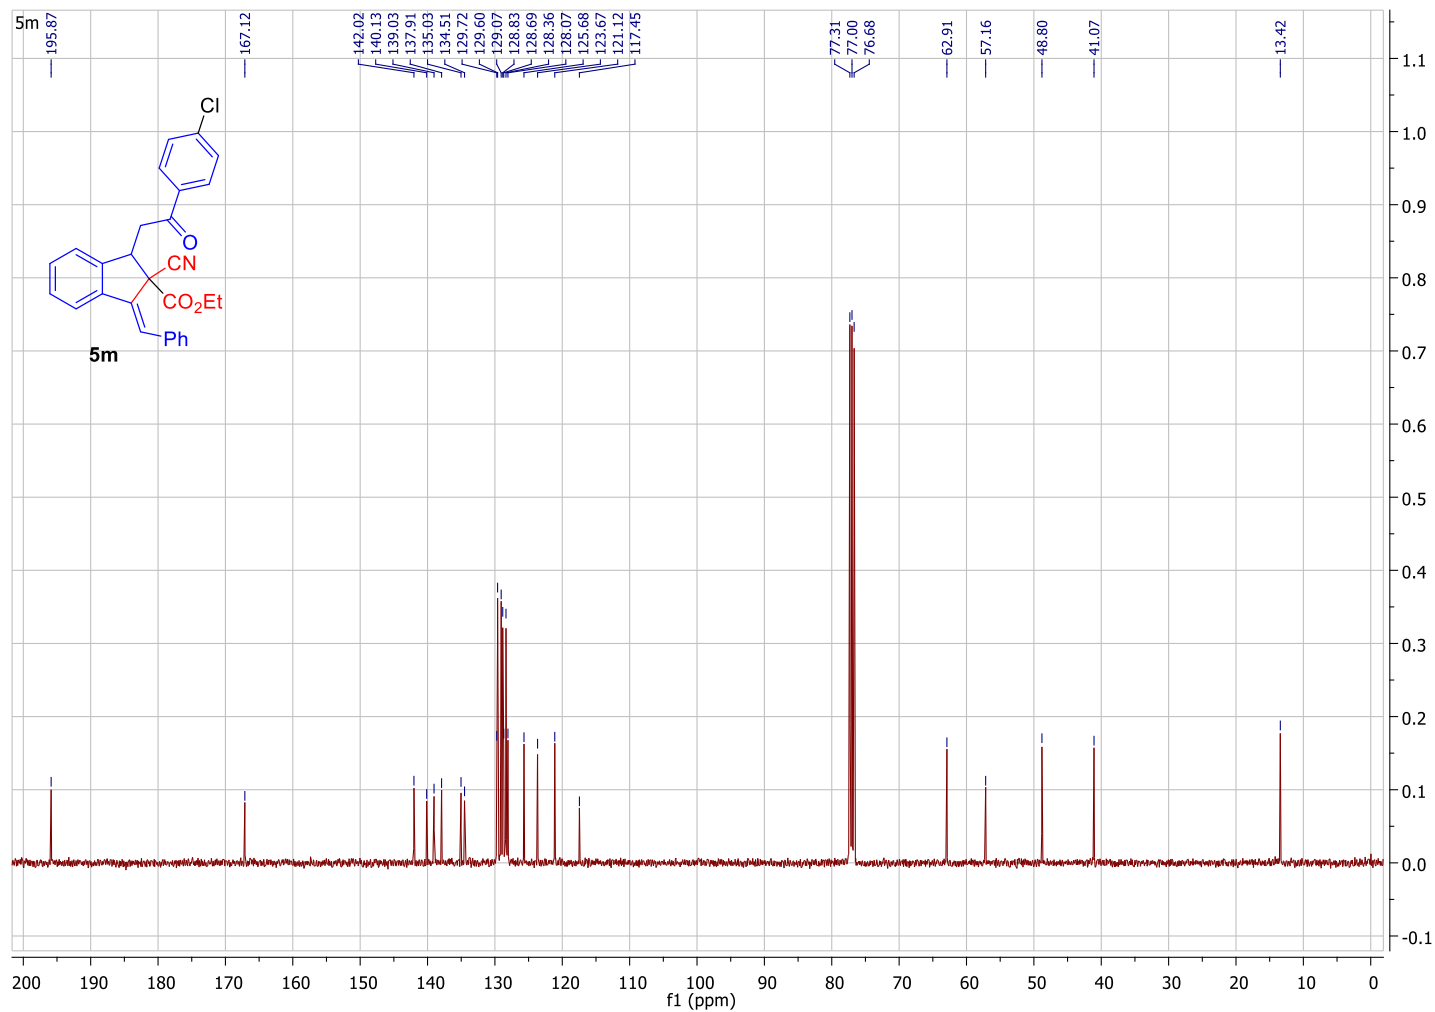

### HRMS: (5m)

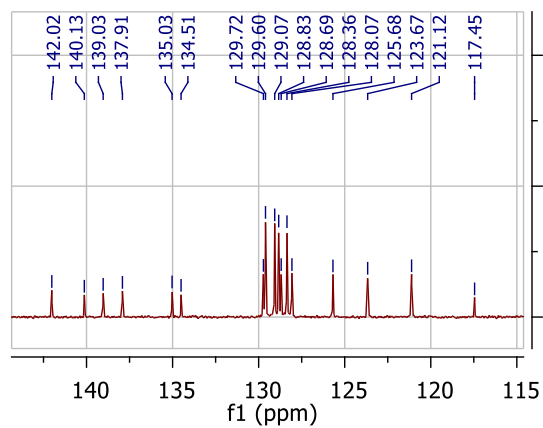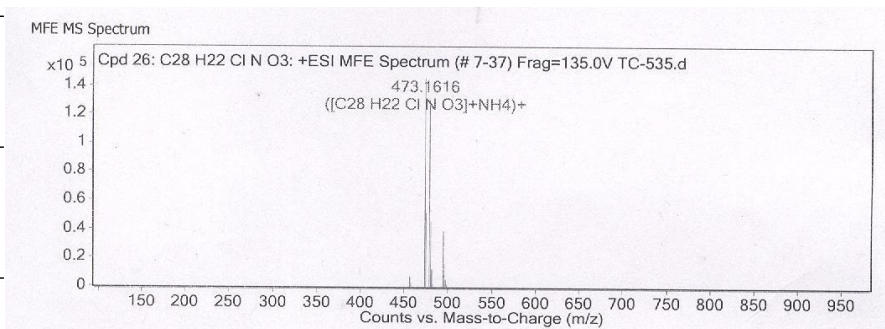

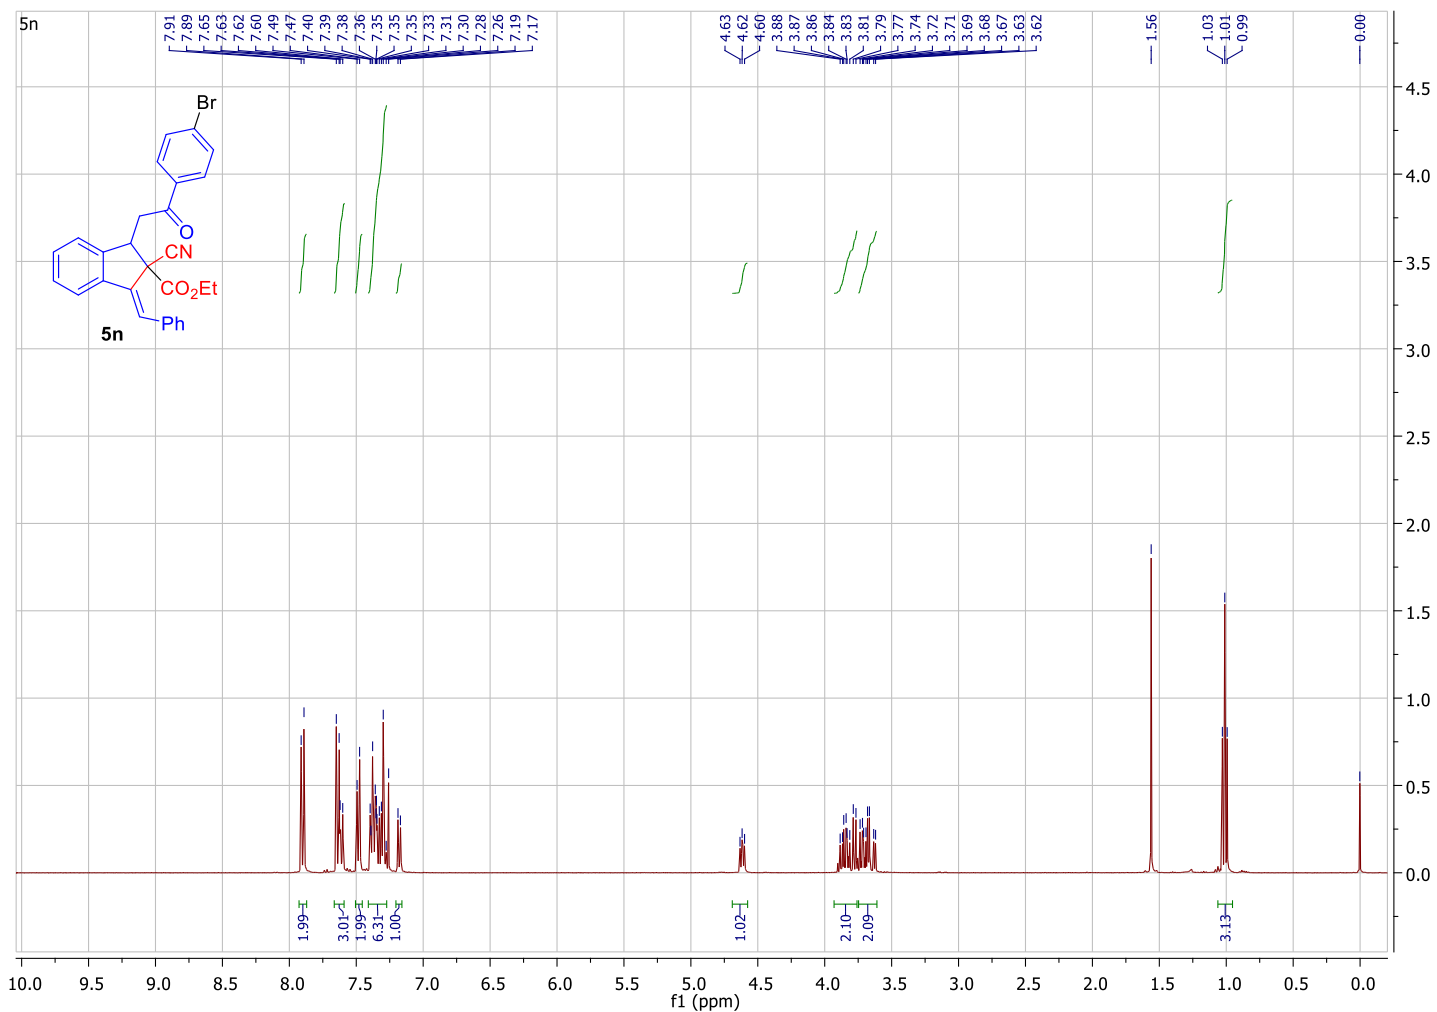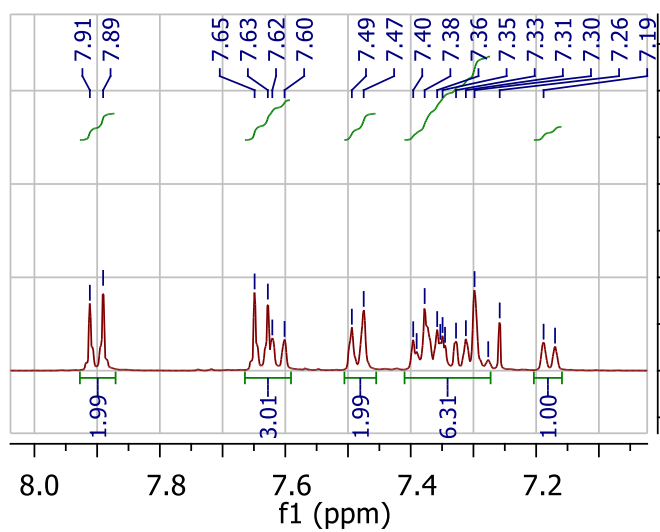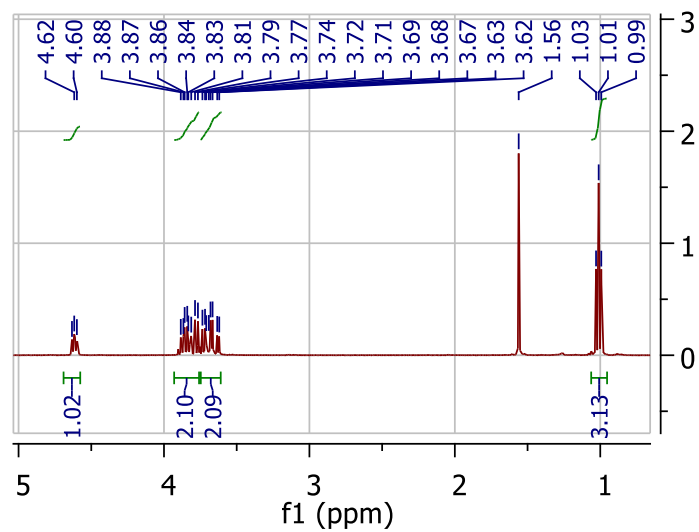

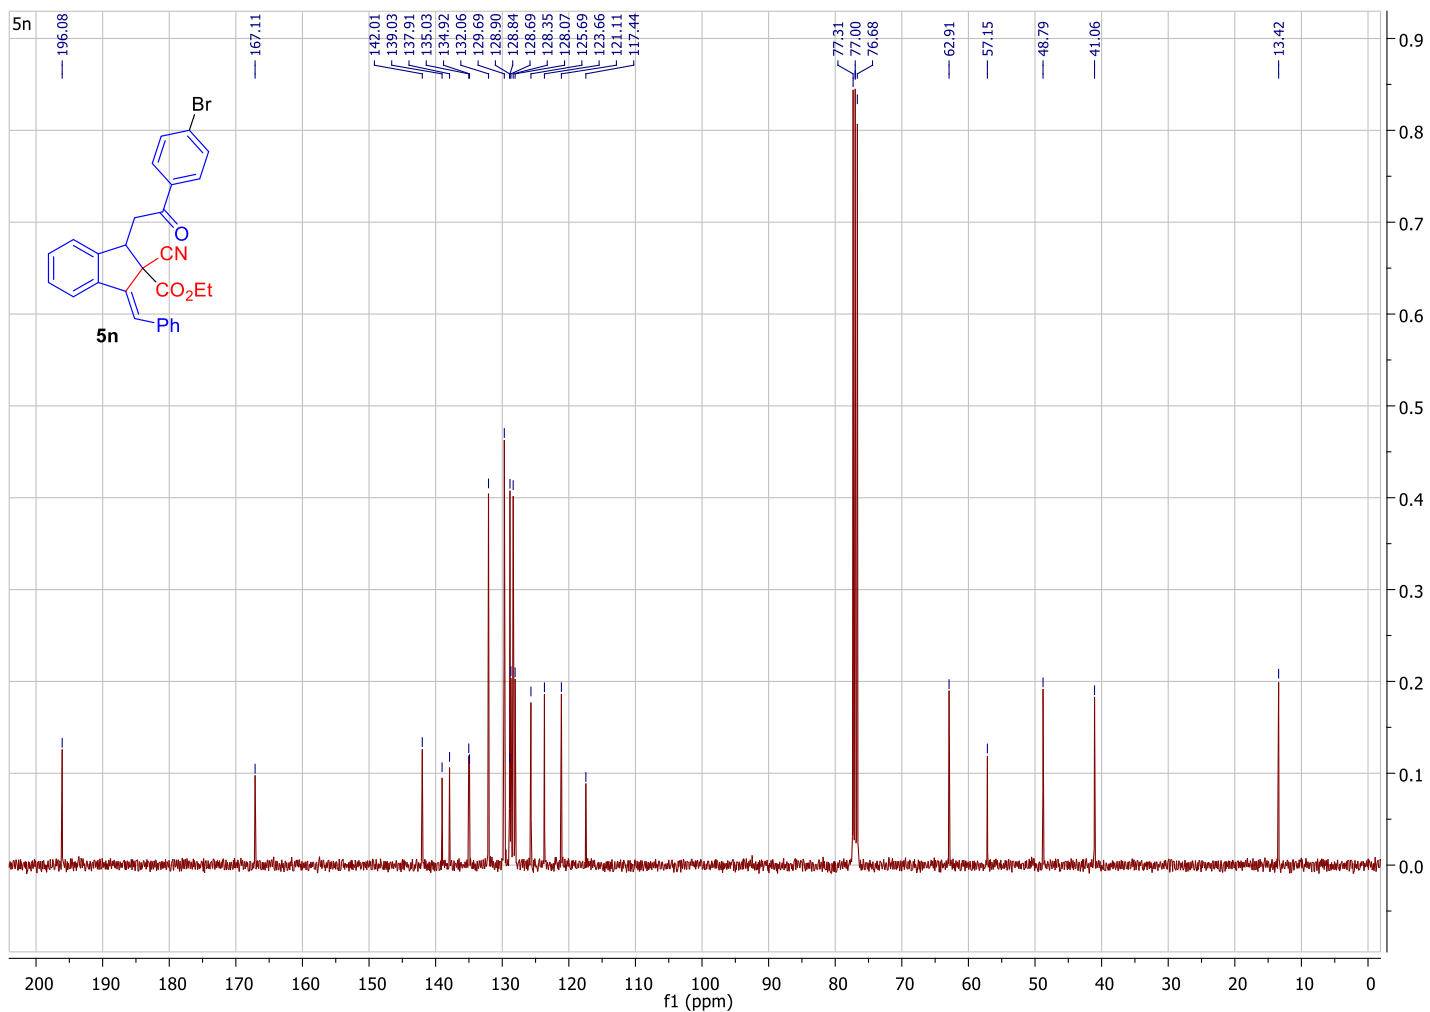

HRMS: (3n):

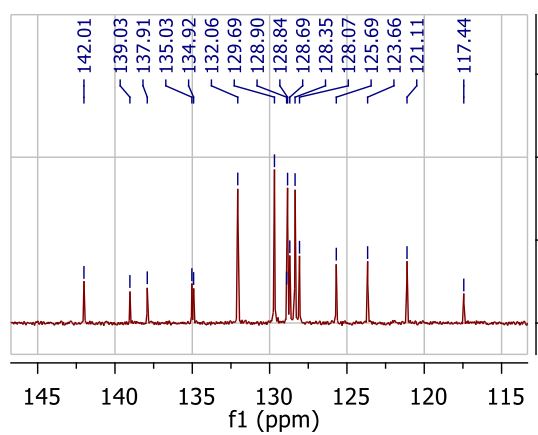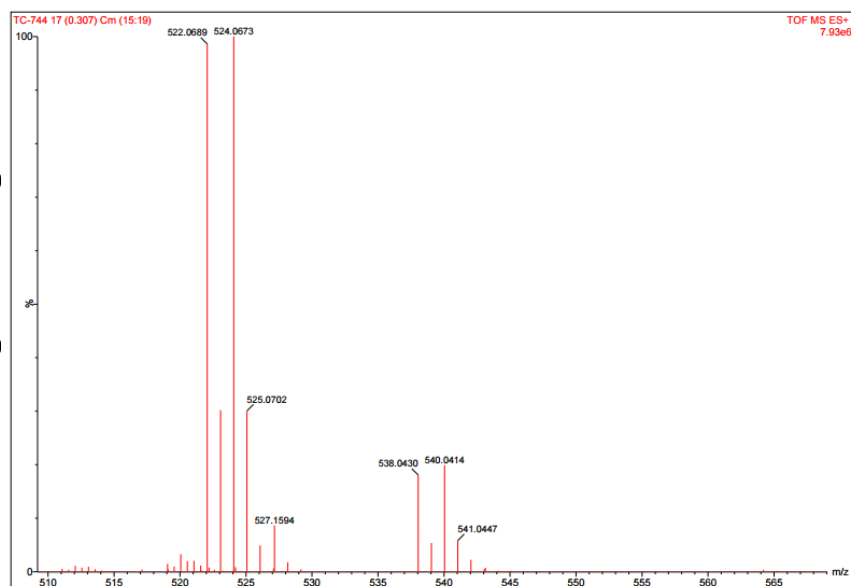

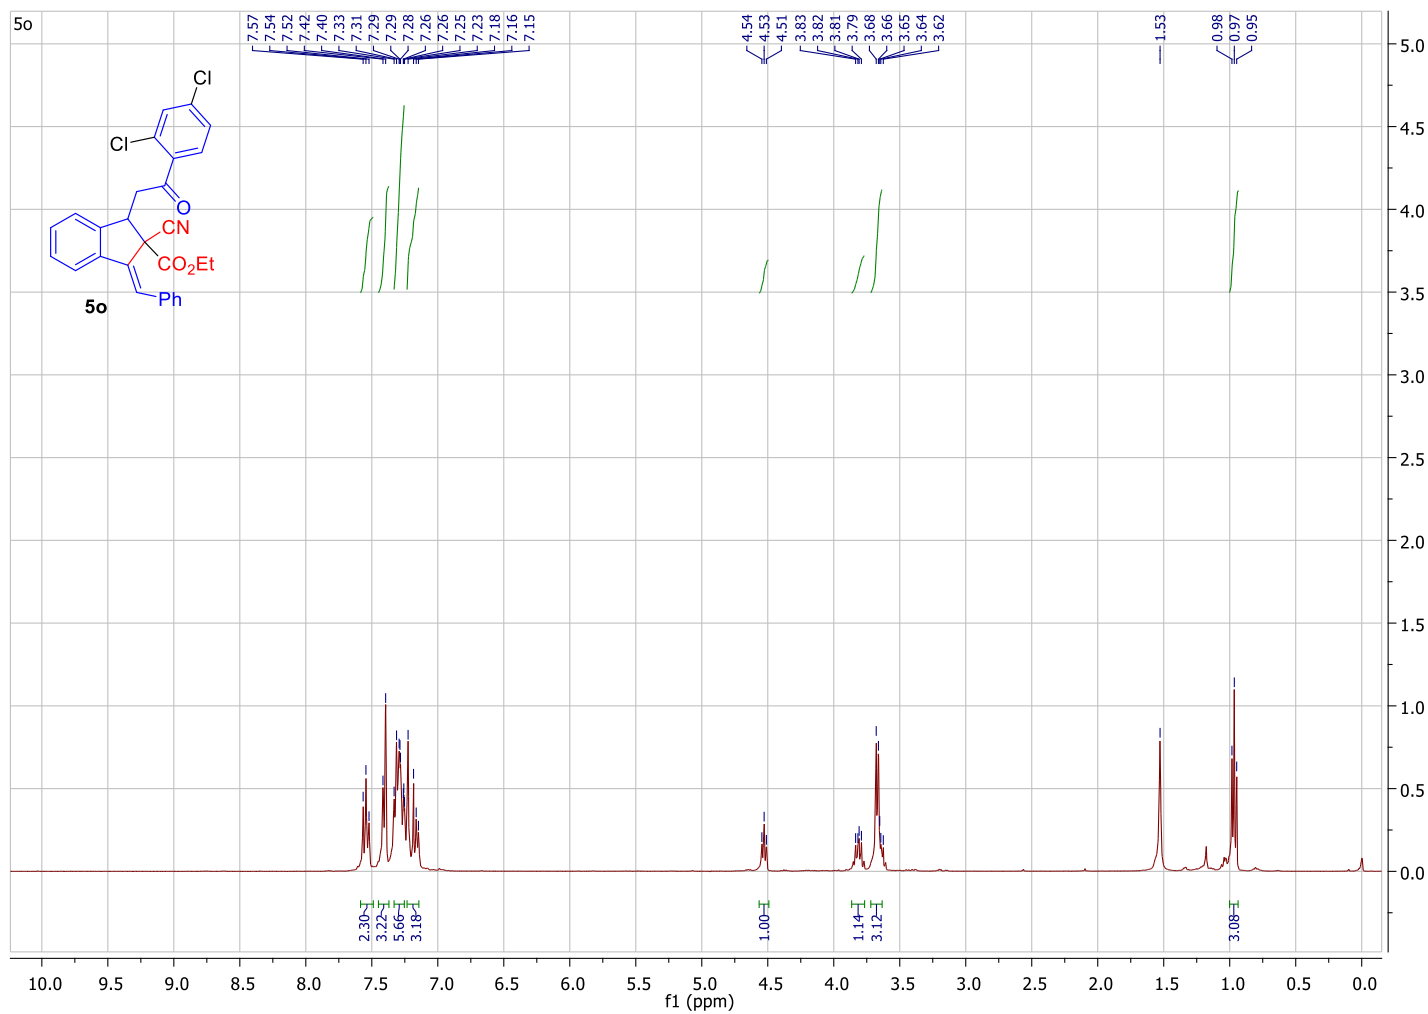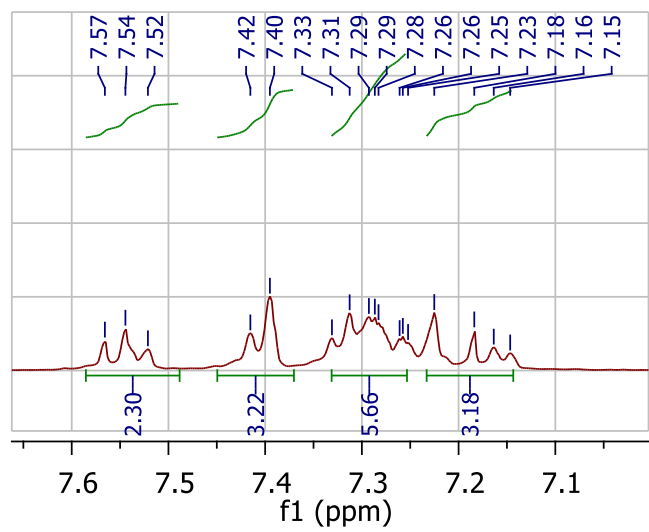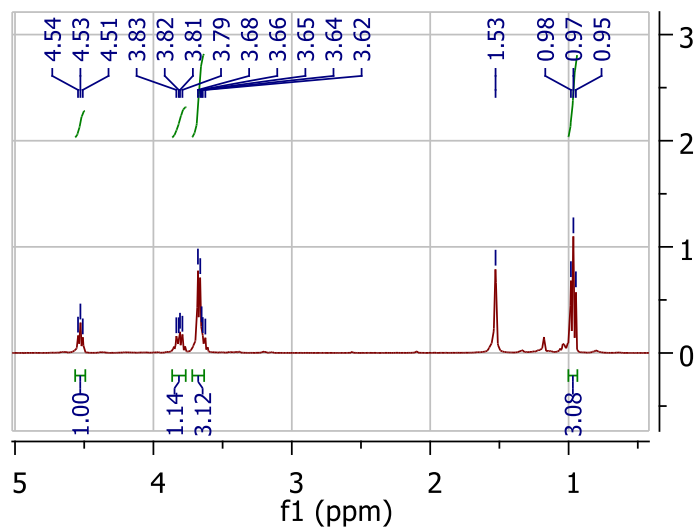



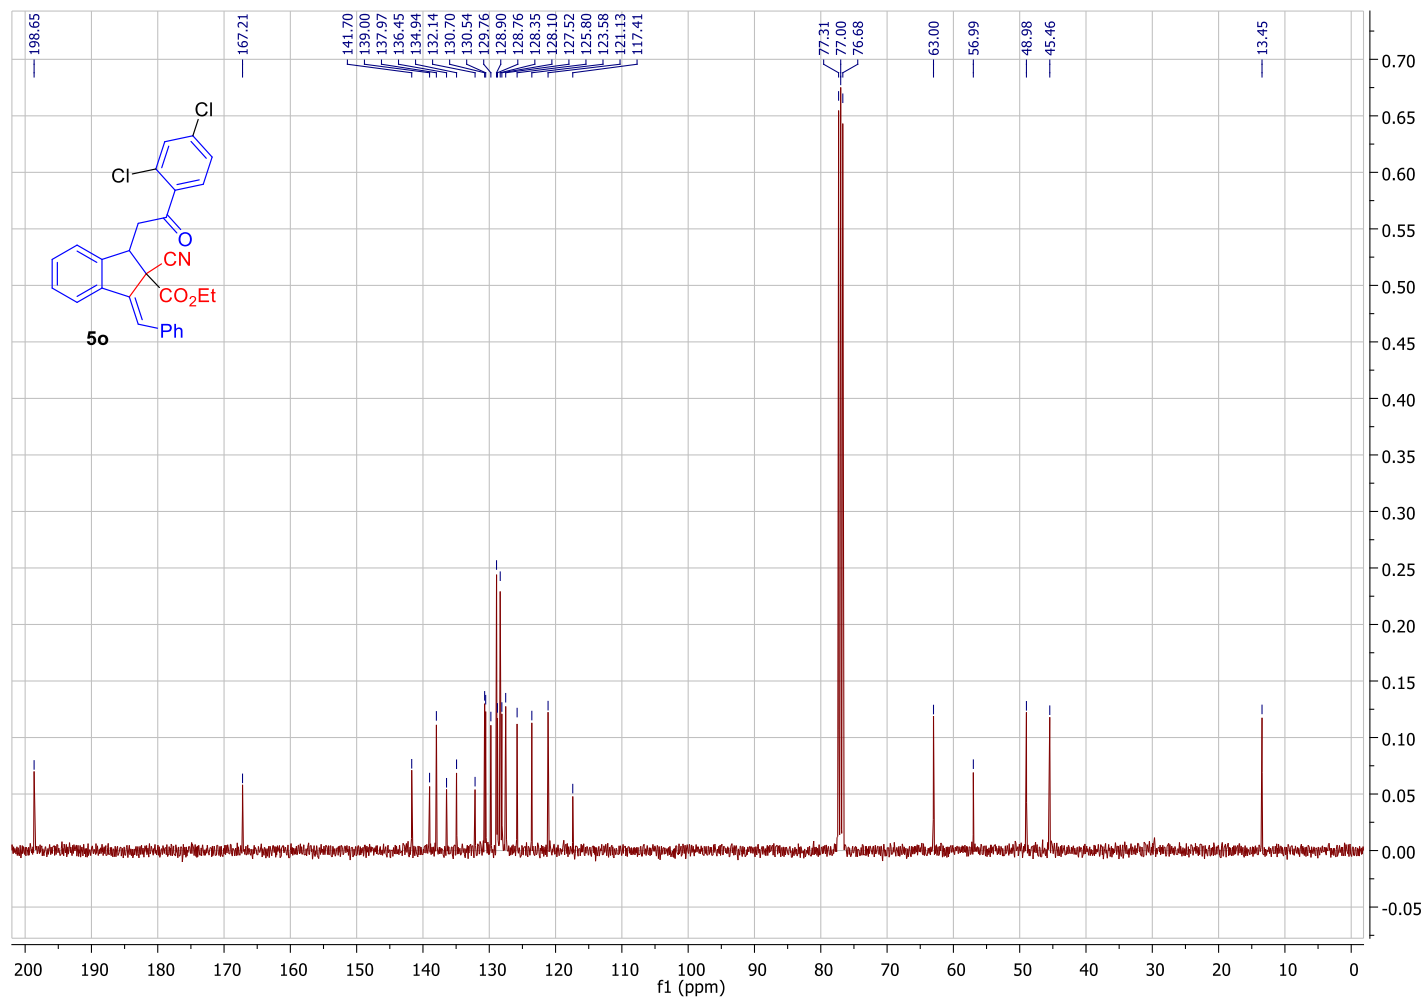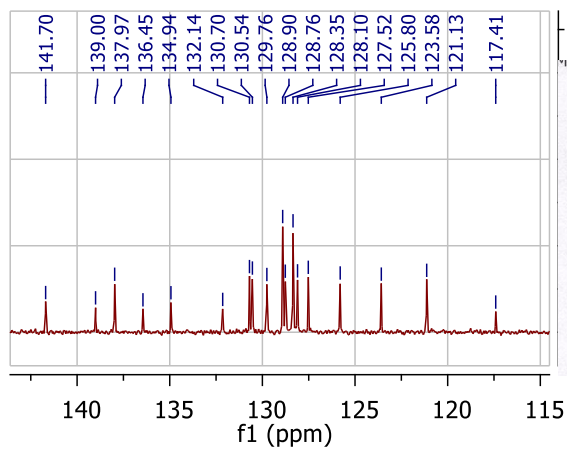

### HRMS: (5o)

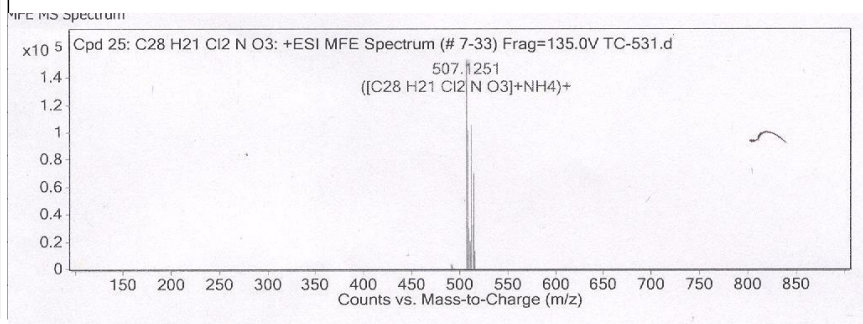

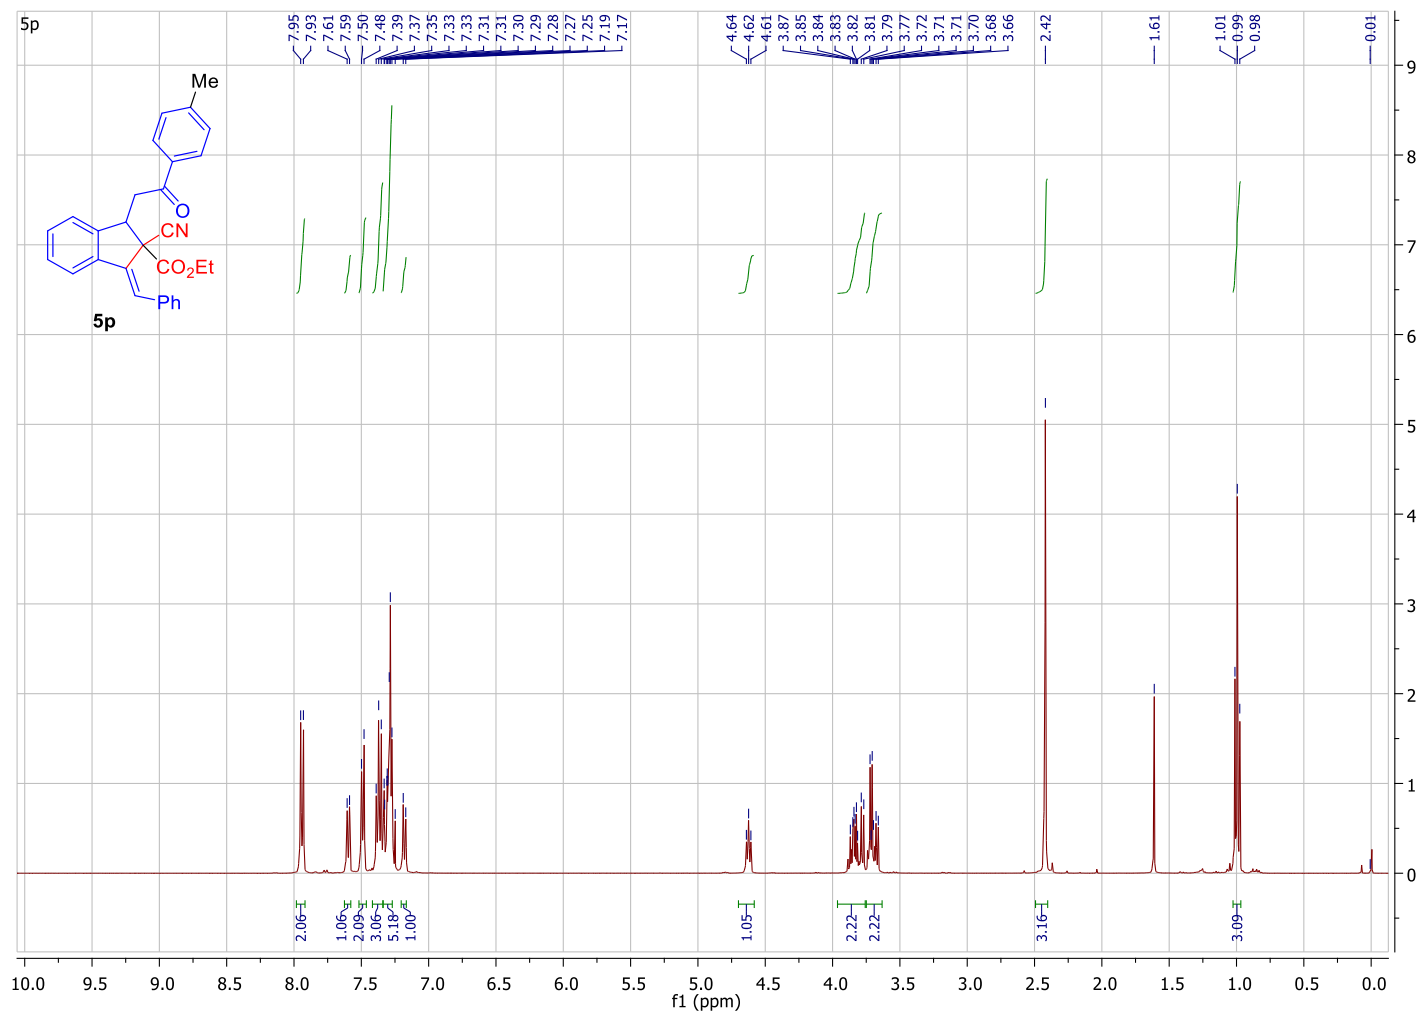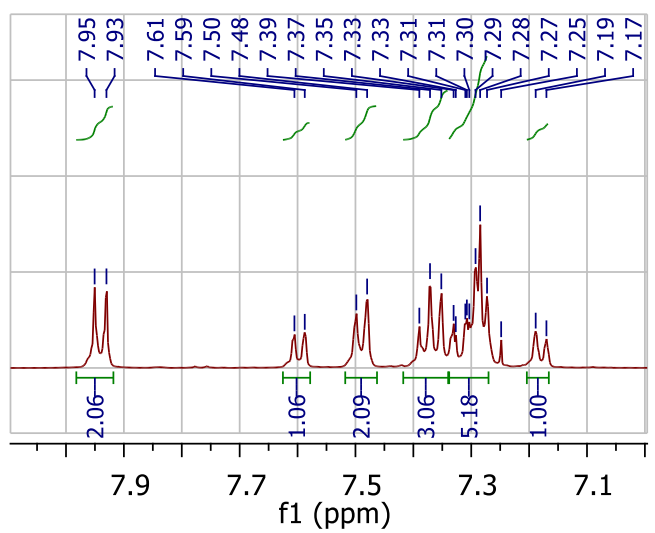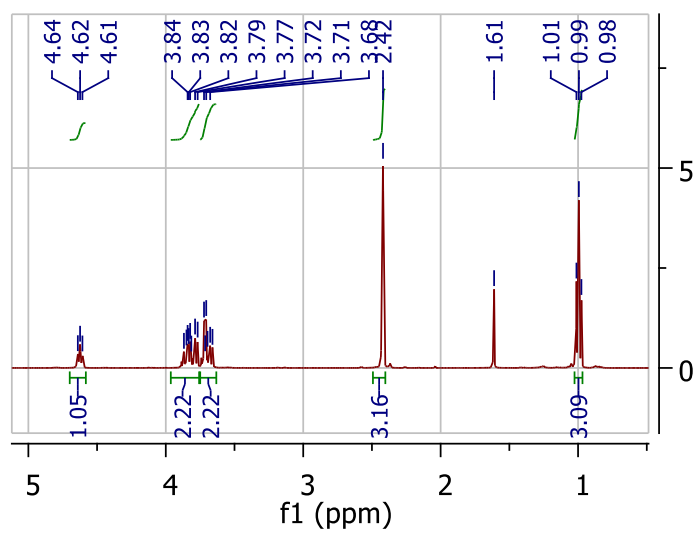

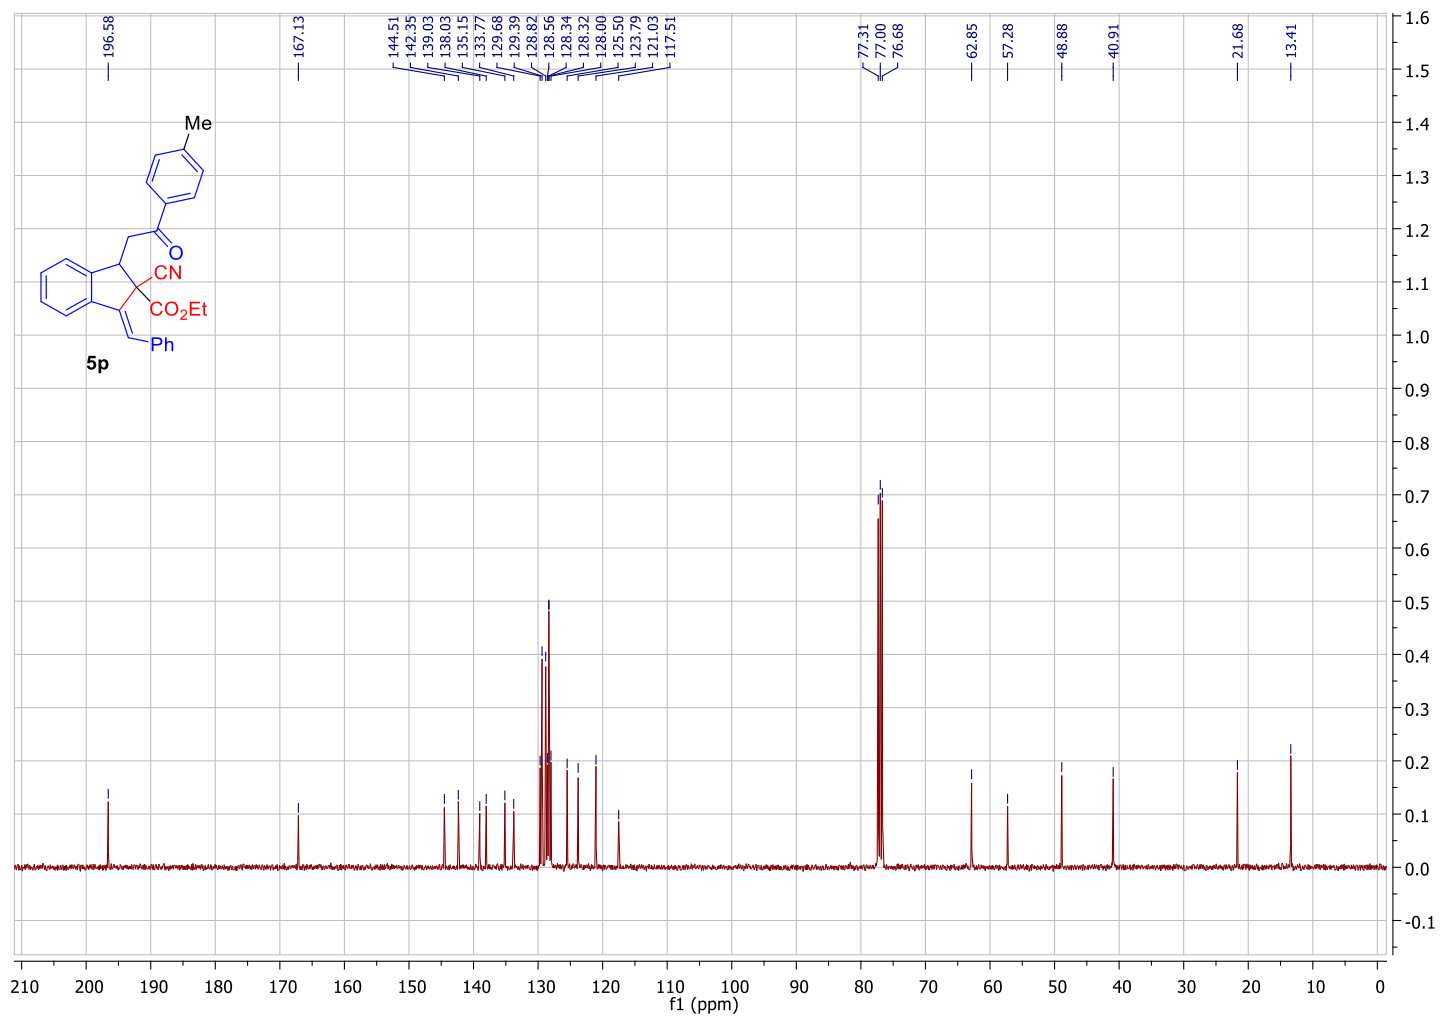

### HRMS: (5p)

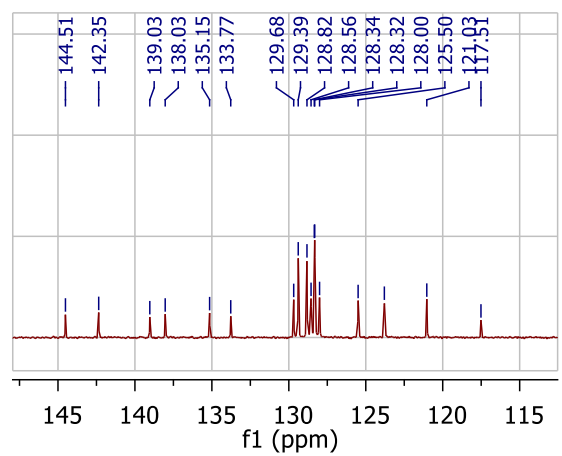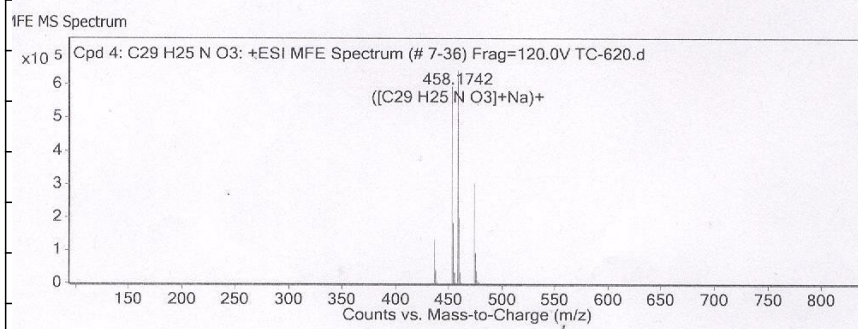

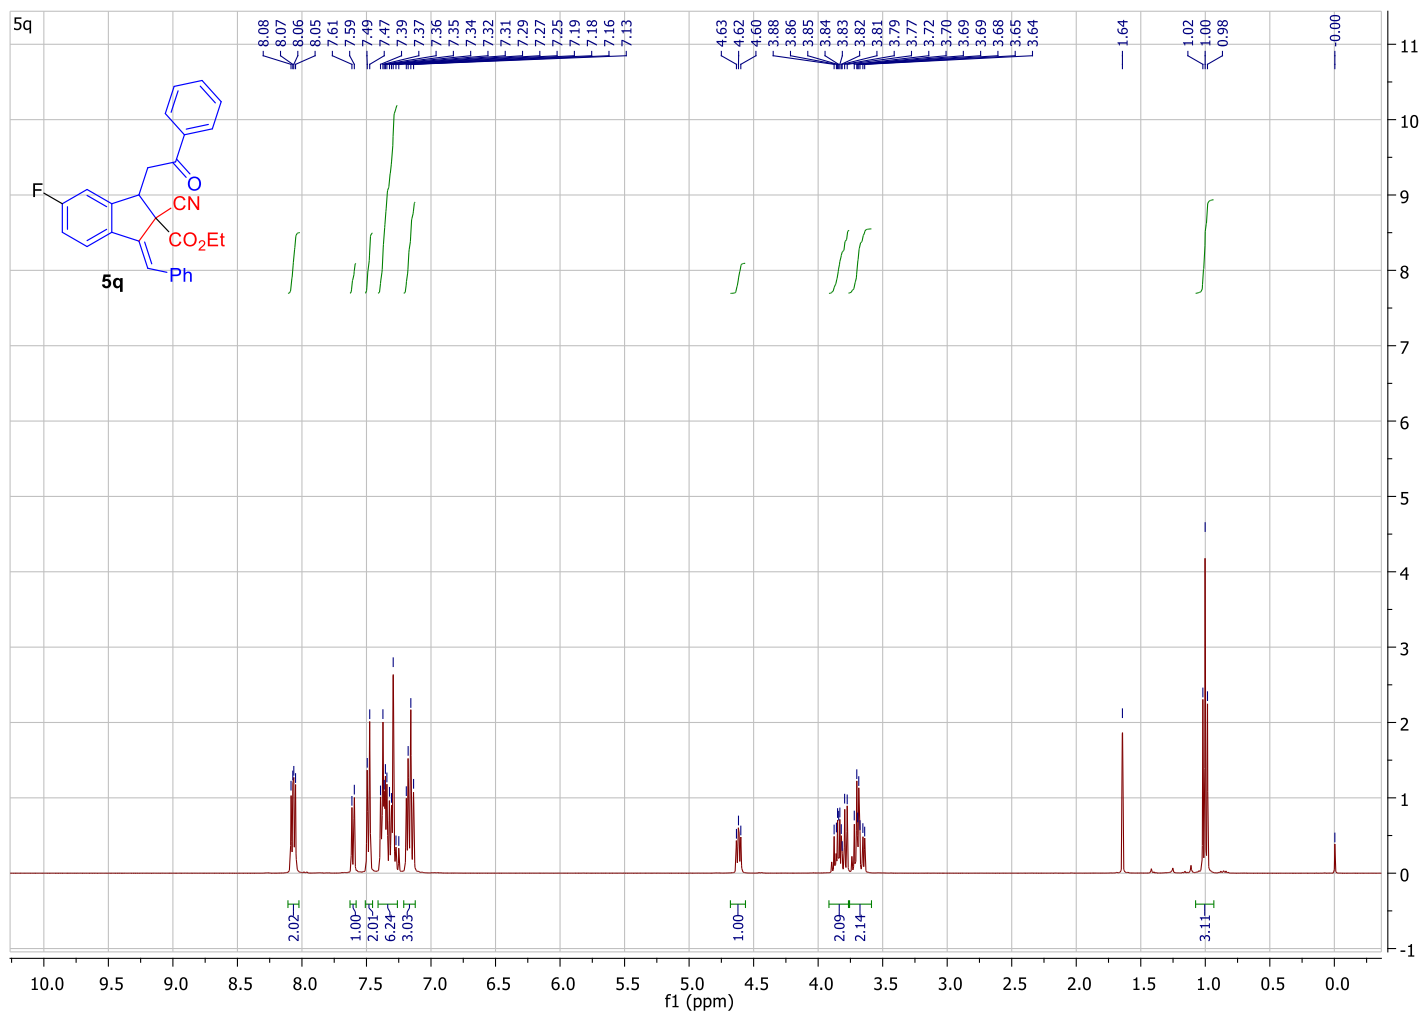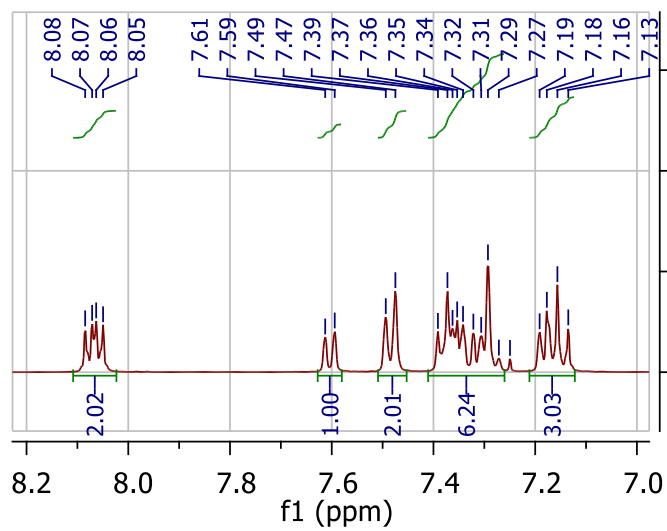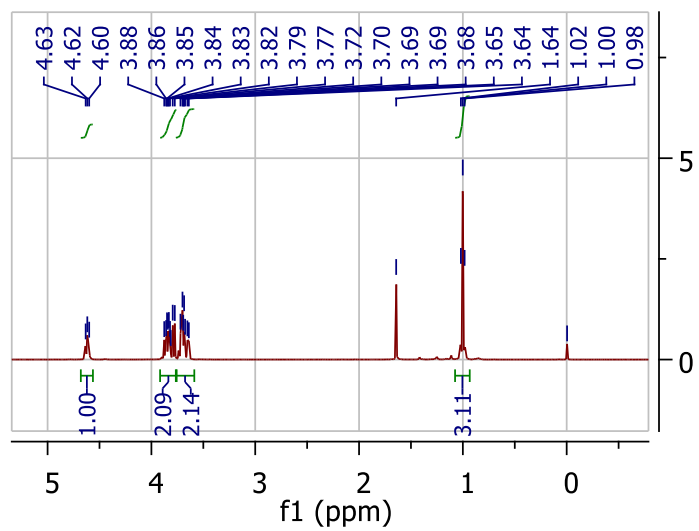

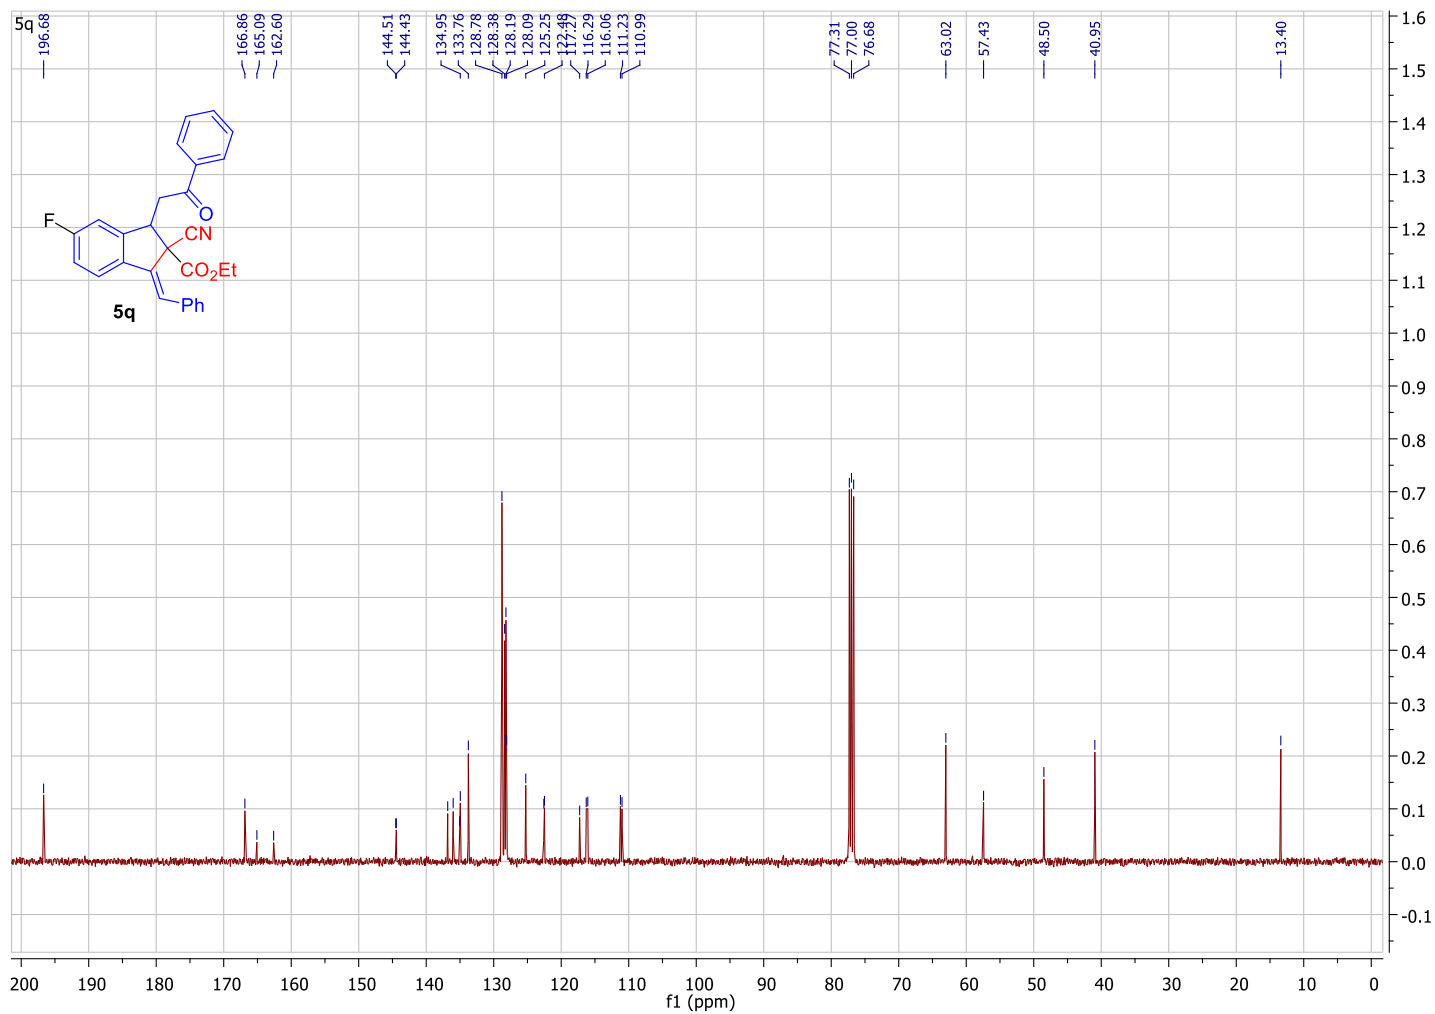

### HRMS: (5q)

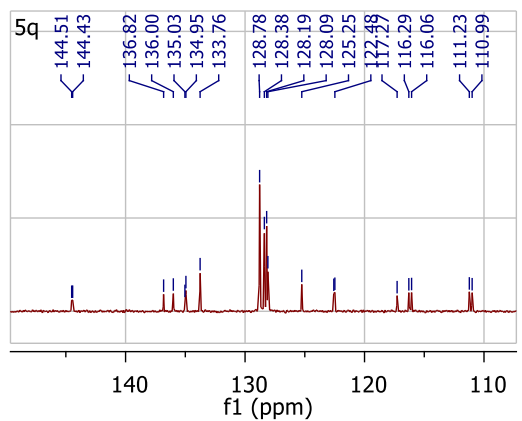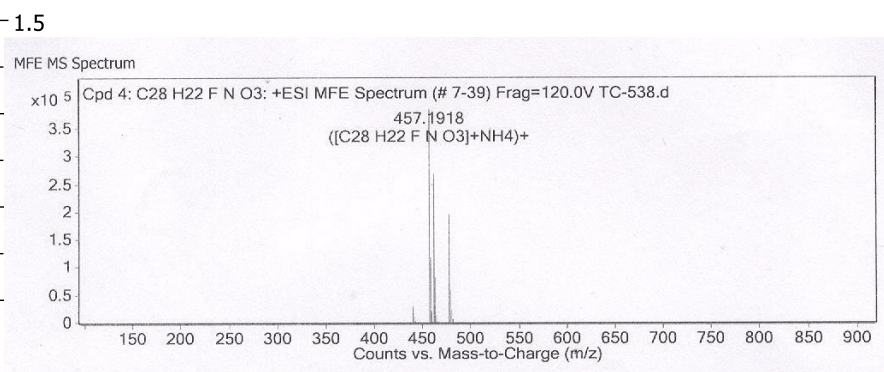

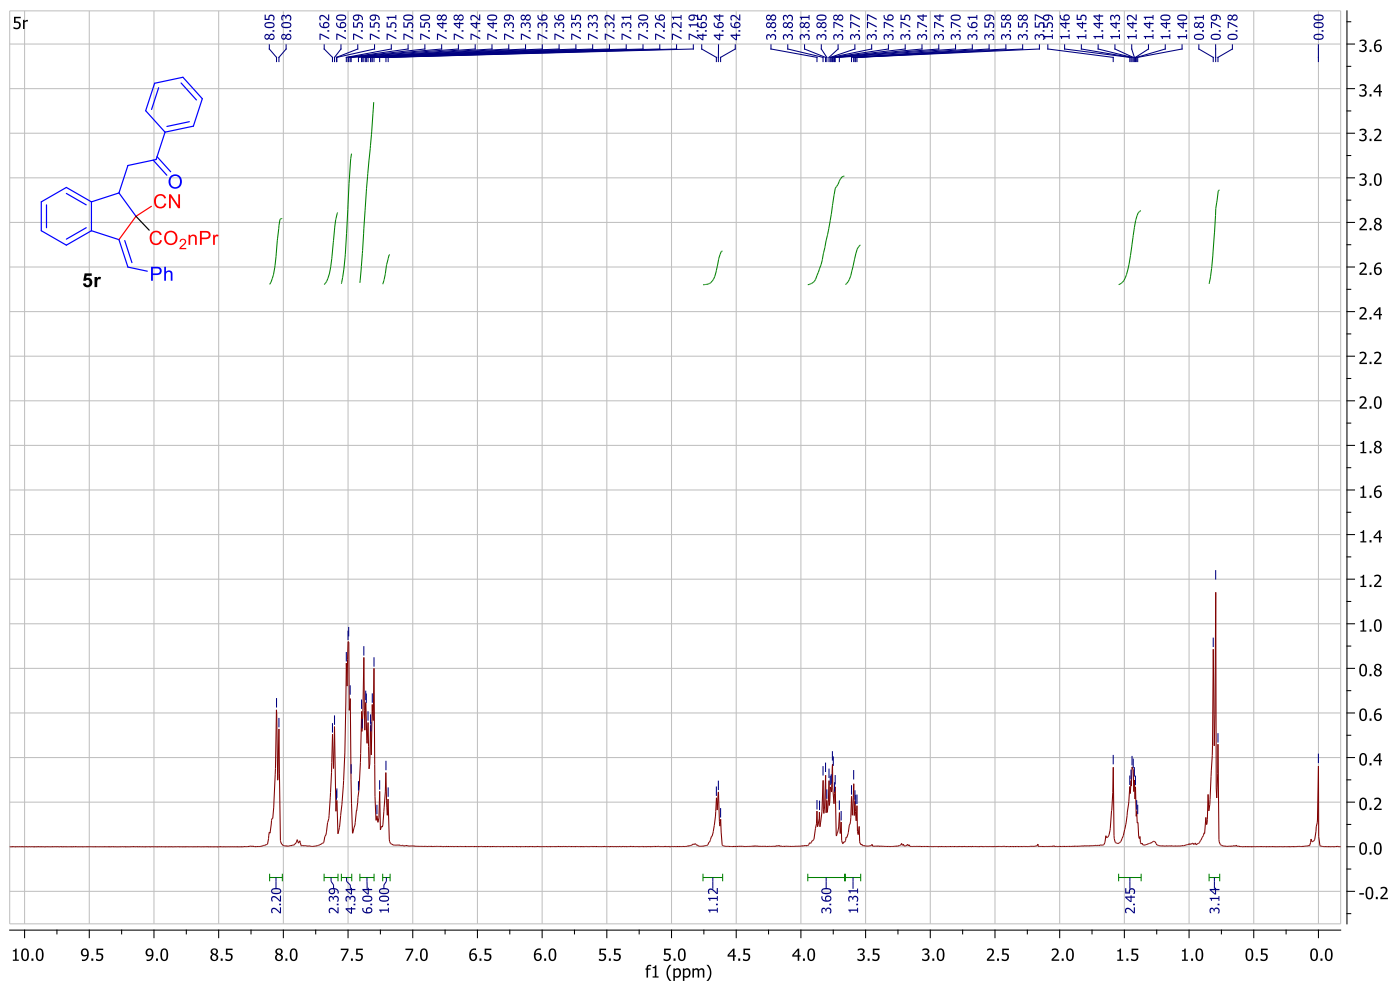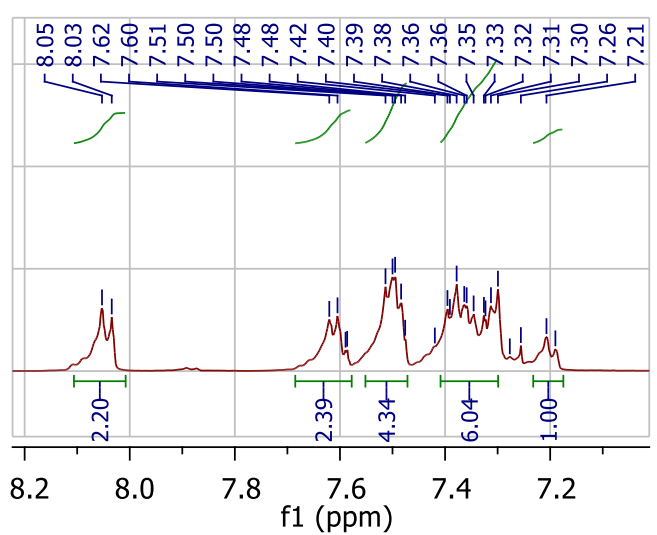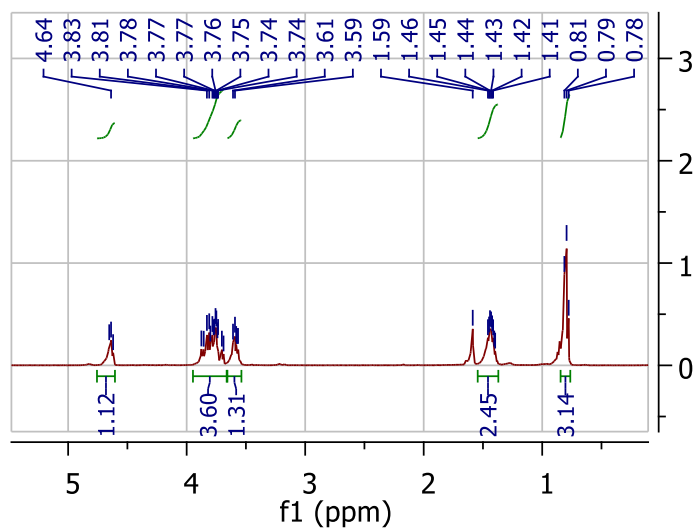

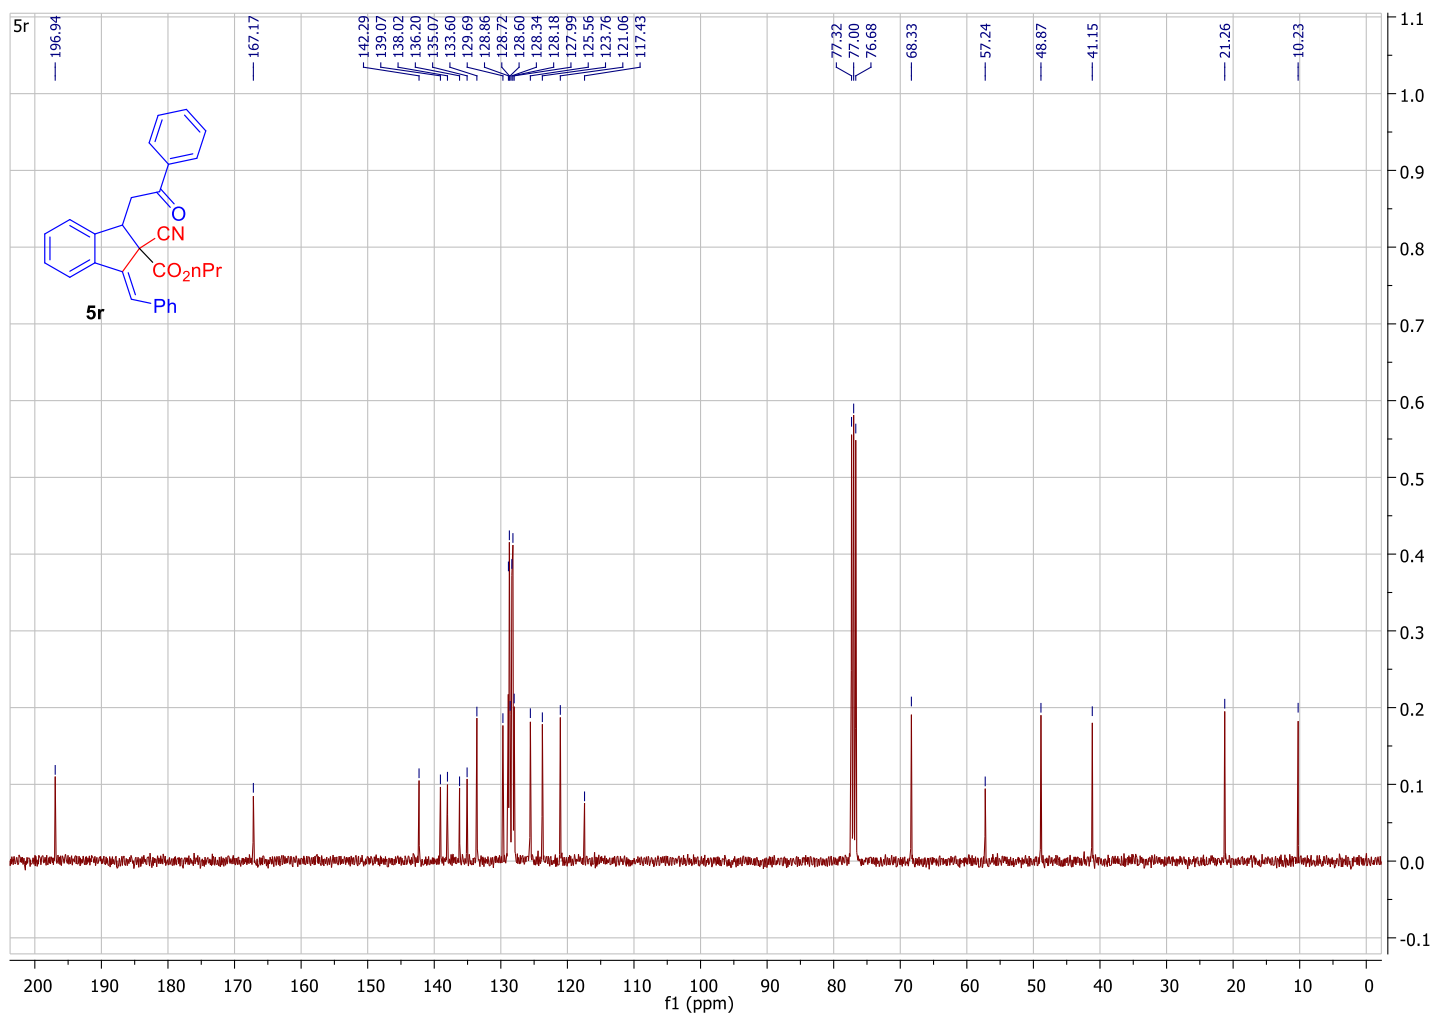

### HRMS: (5r)

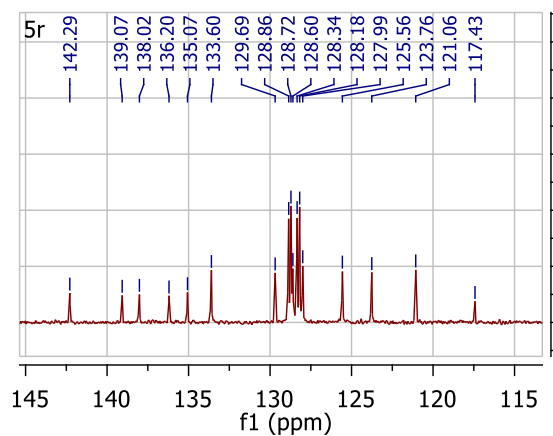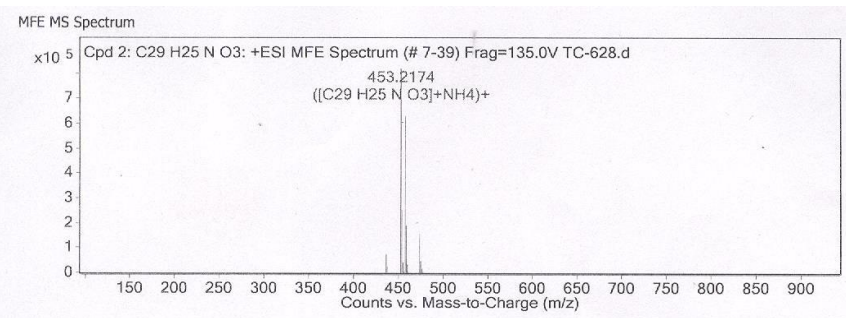

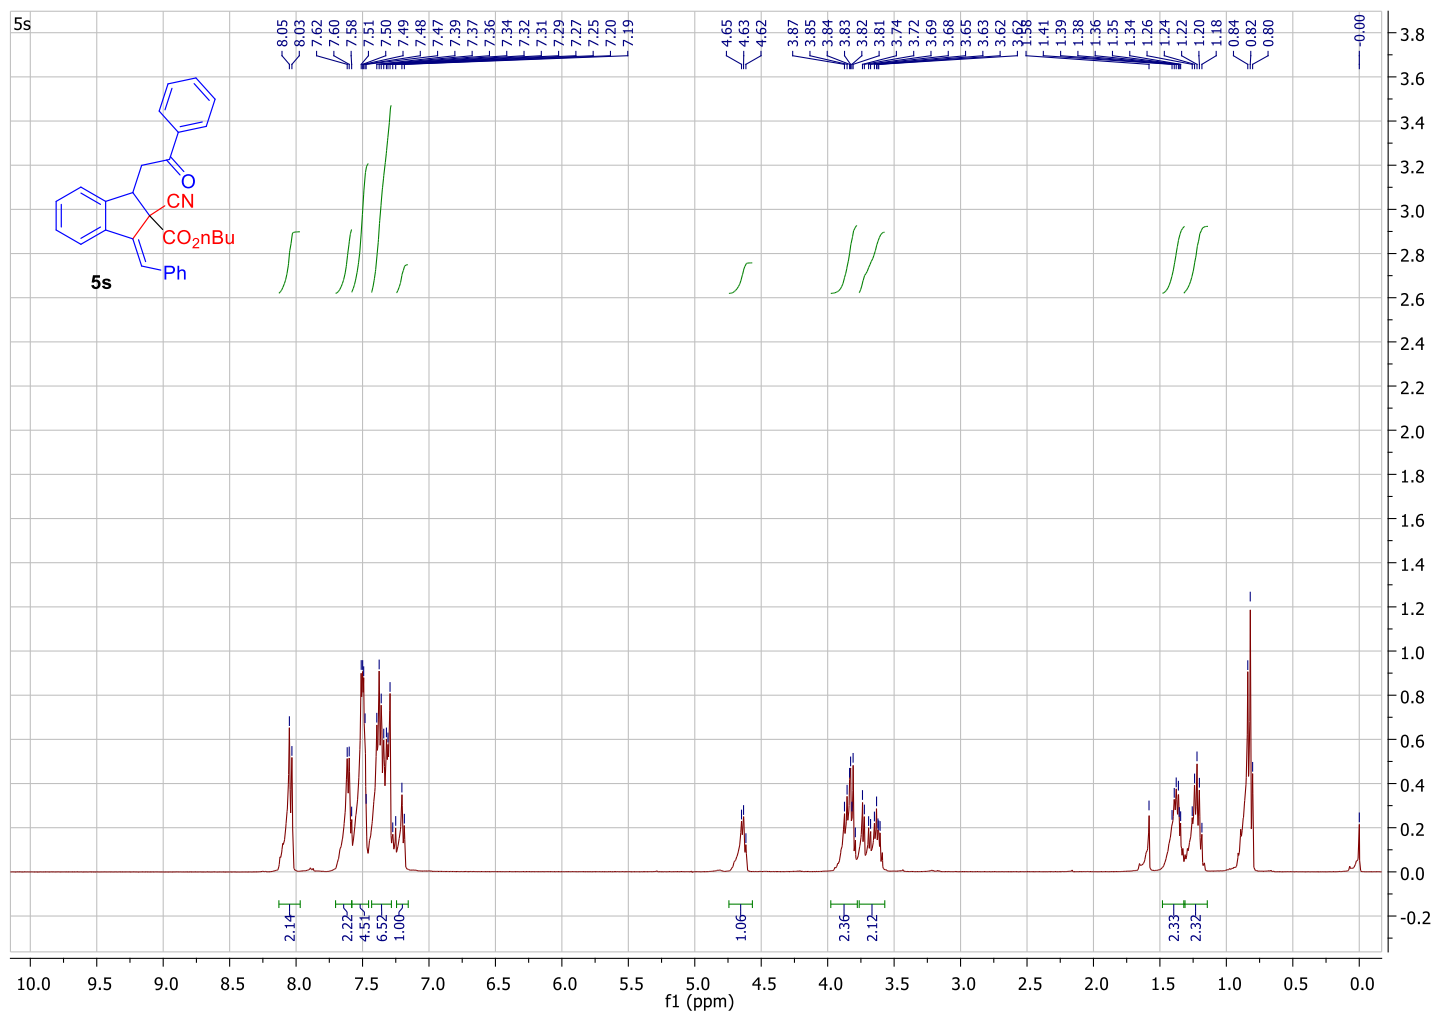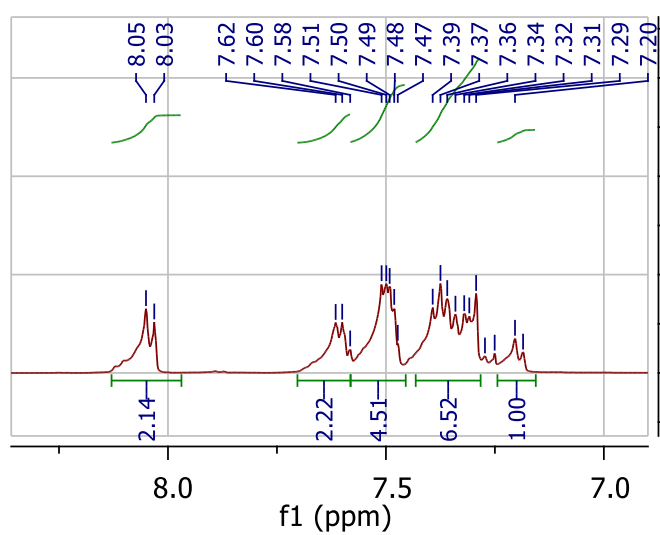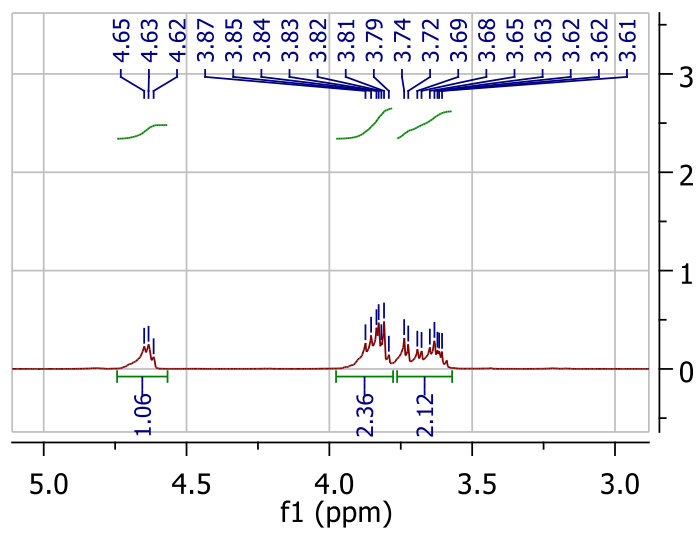



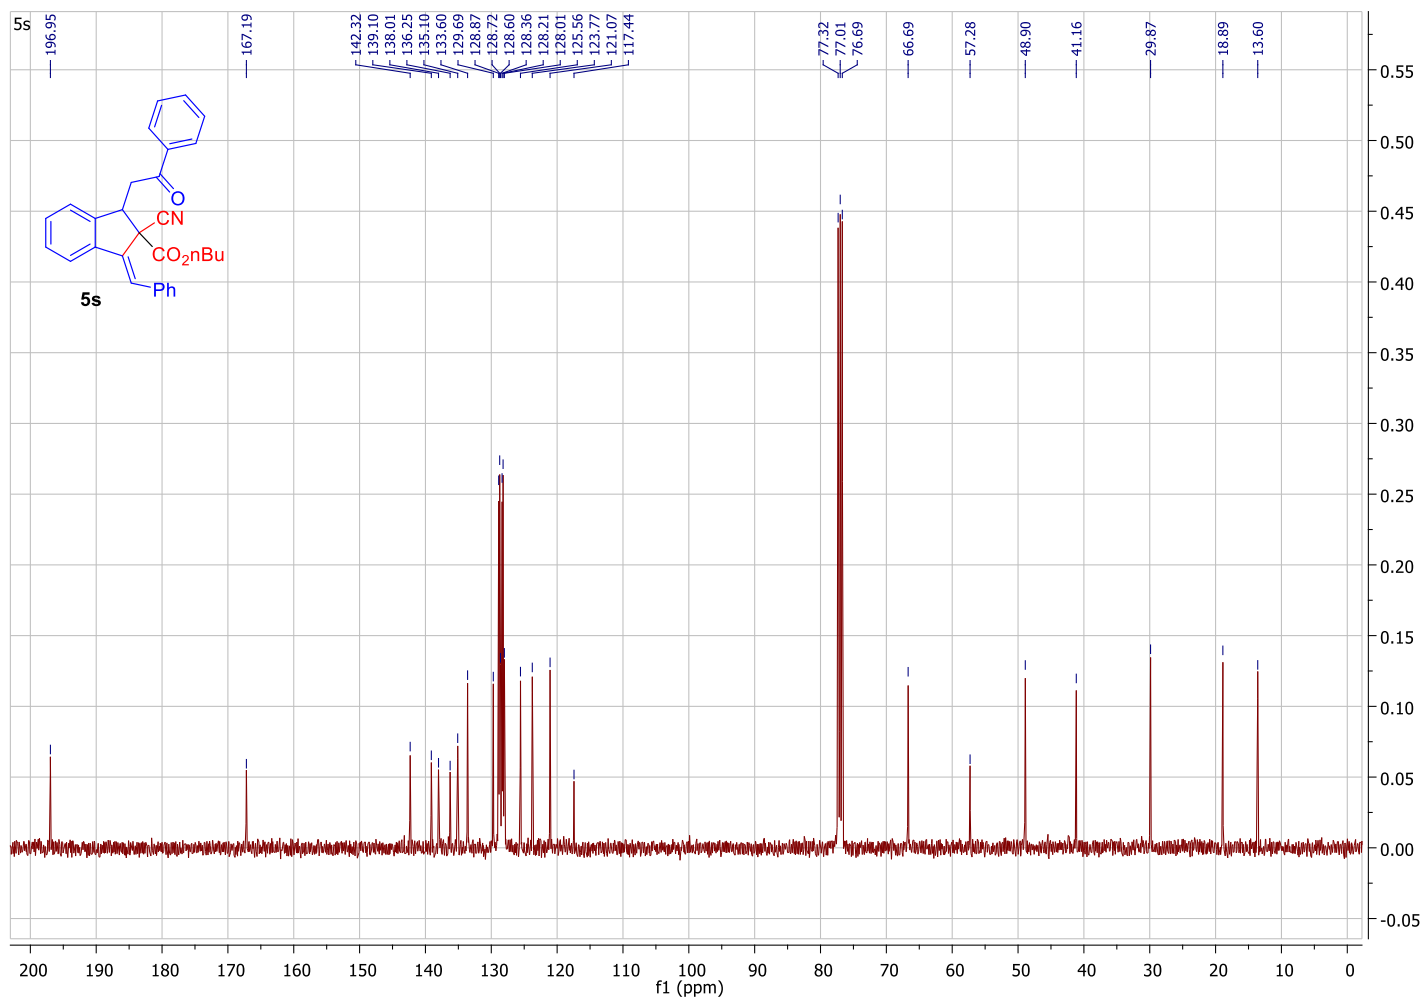

### HRMS: (5s)

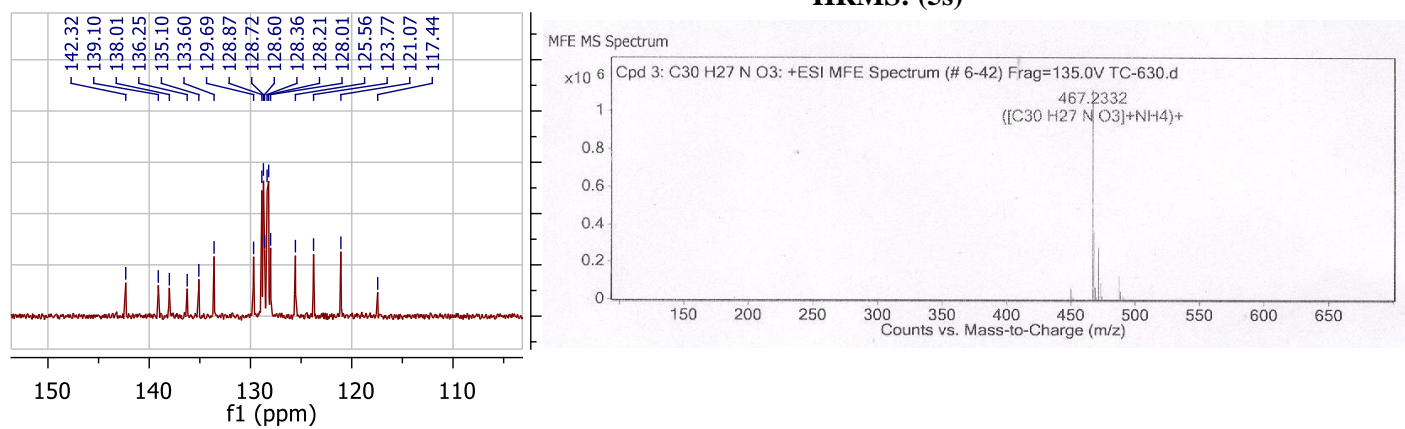

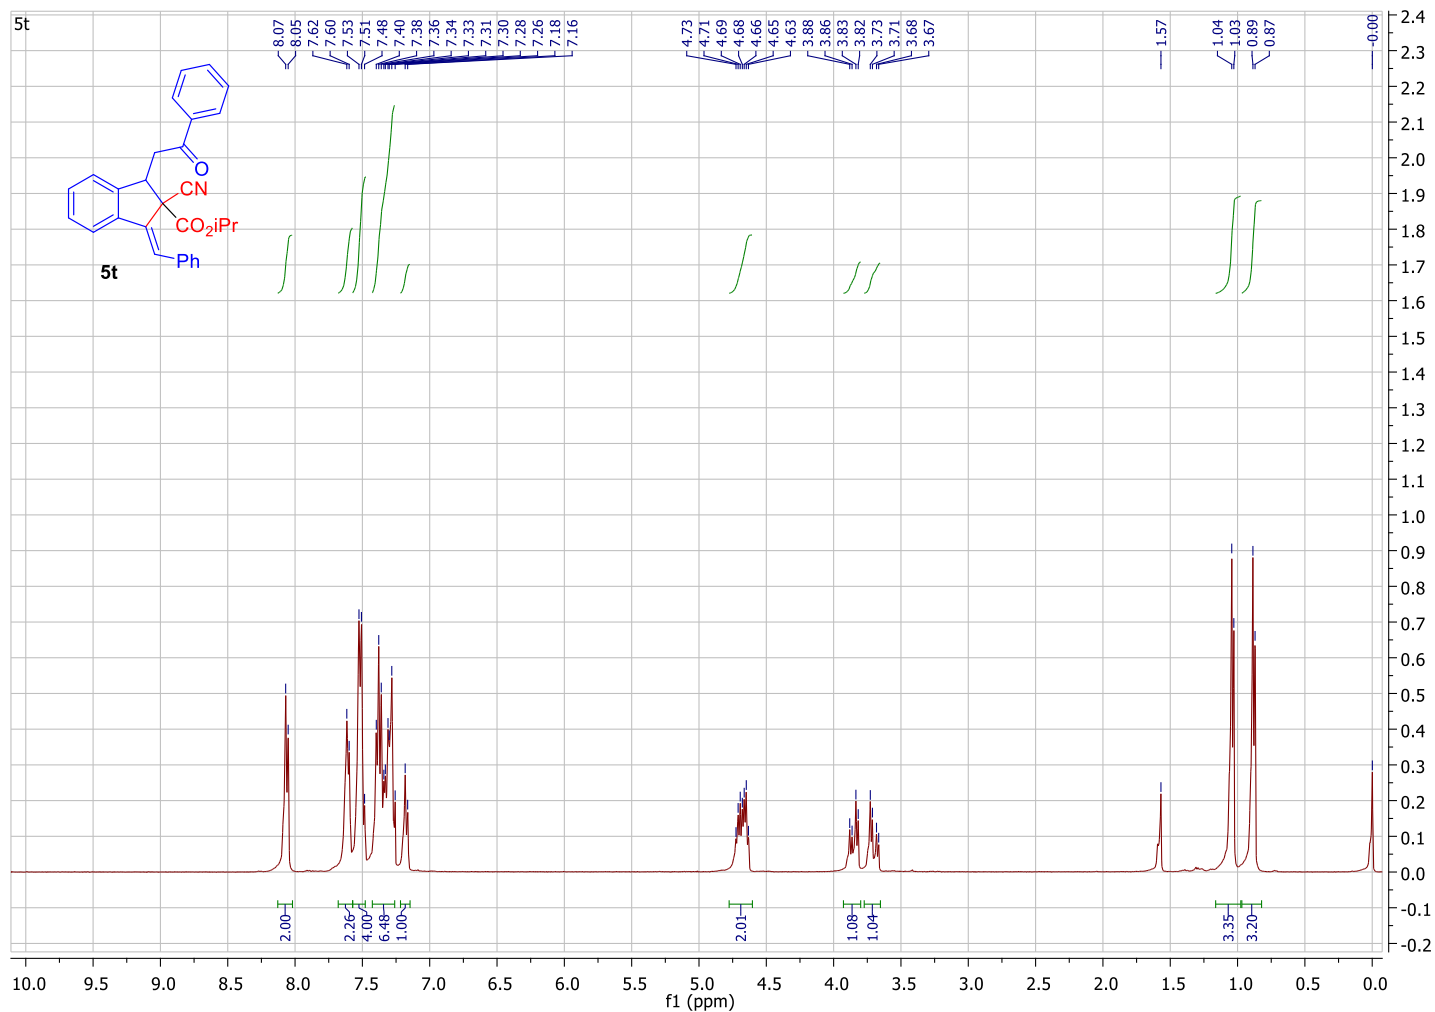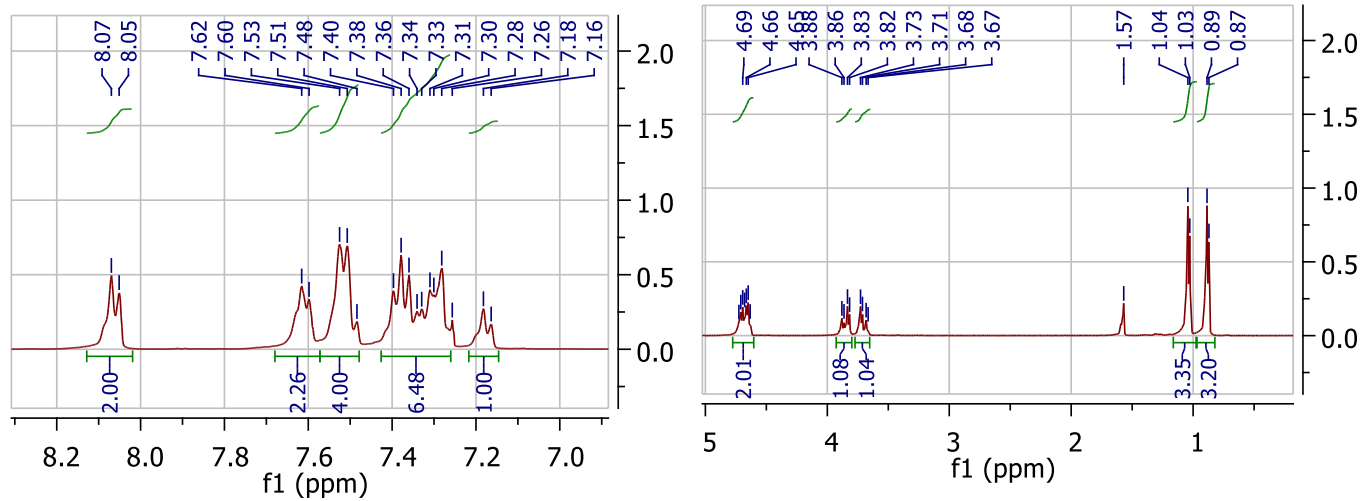

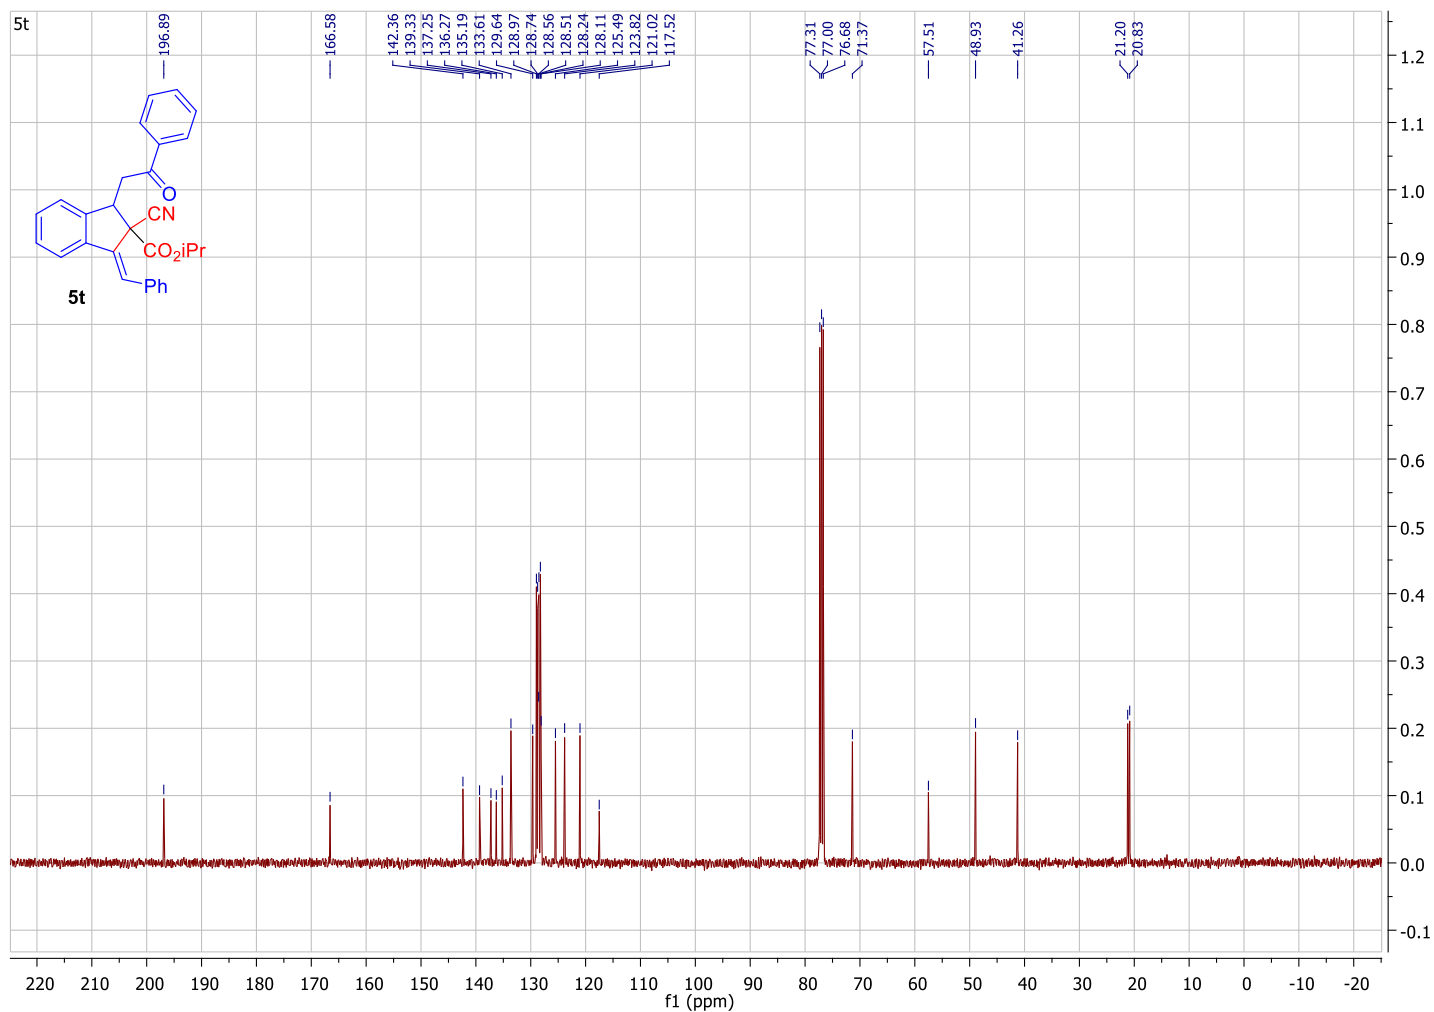

### HRMS: (5t)

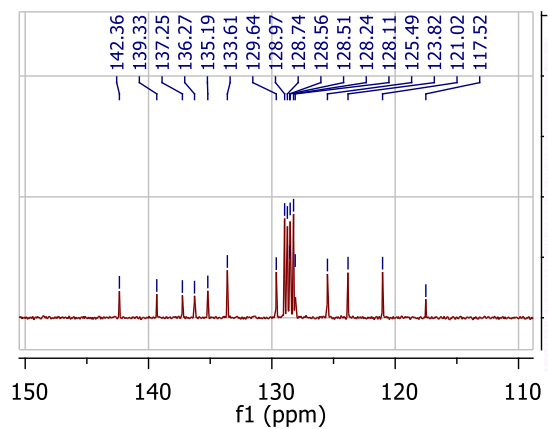

MFE MS Spectrum

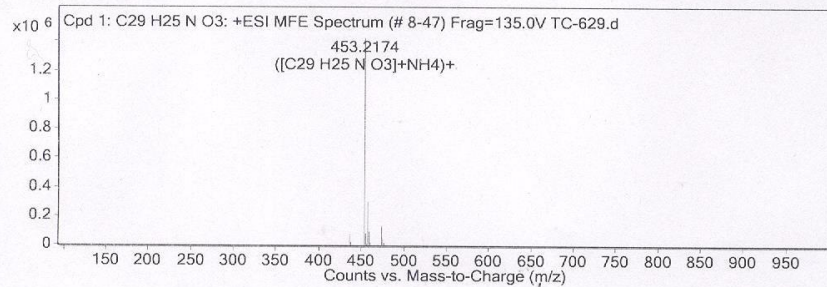

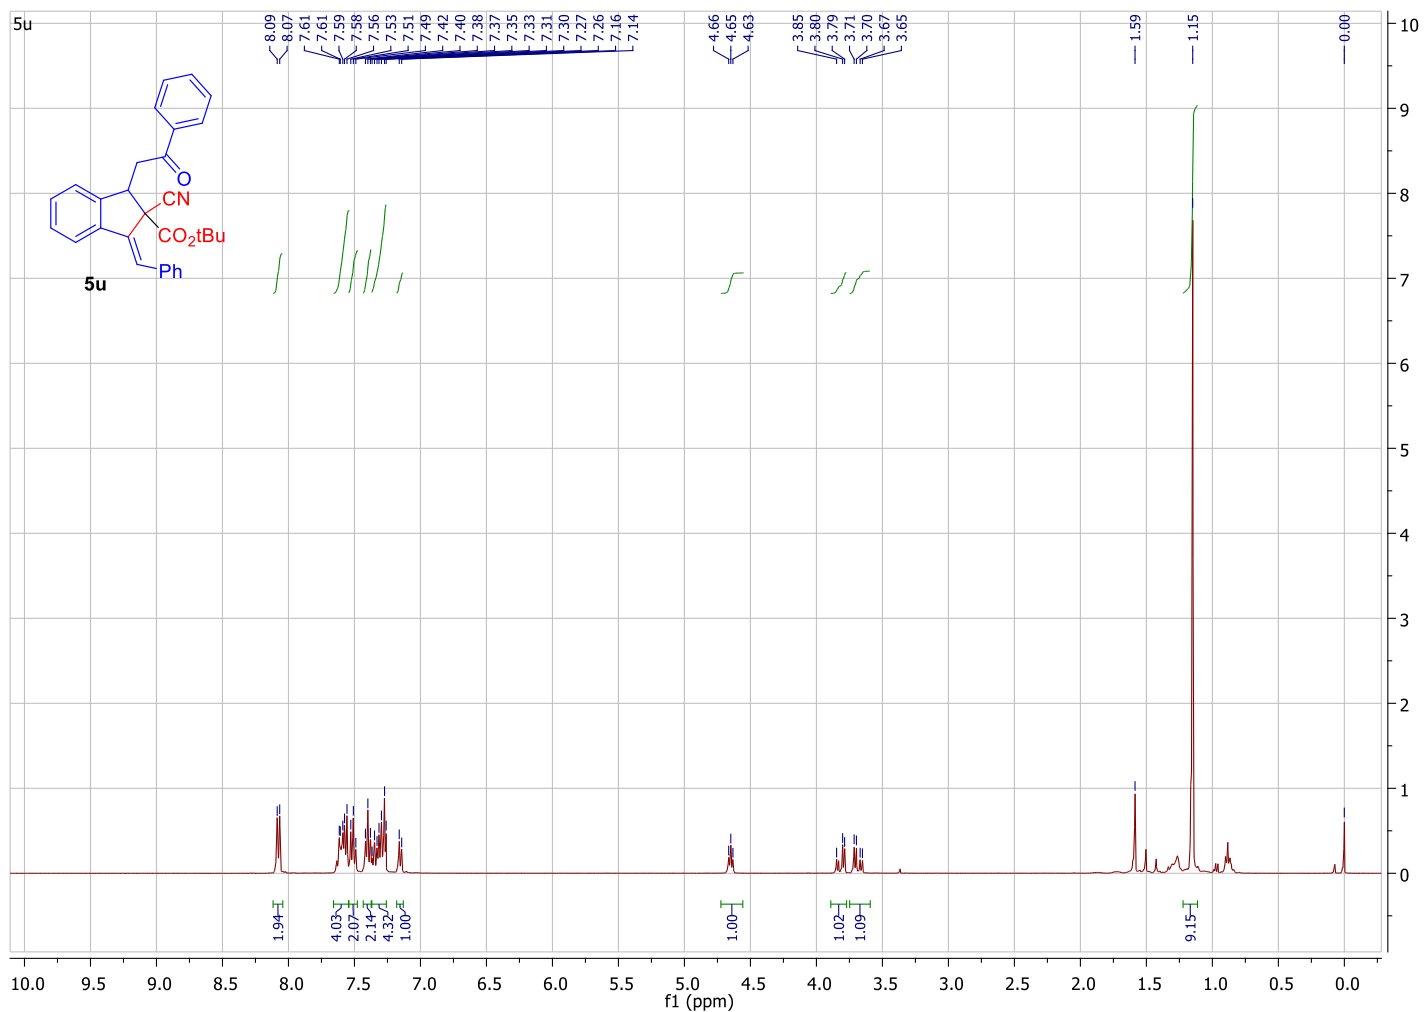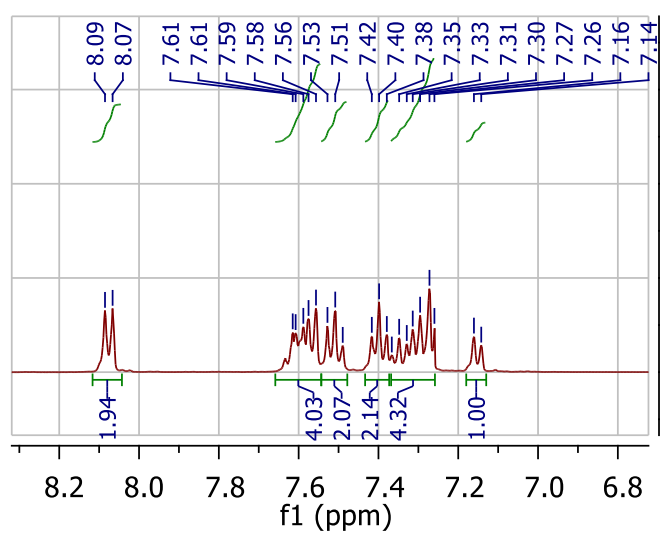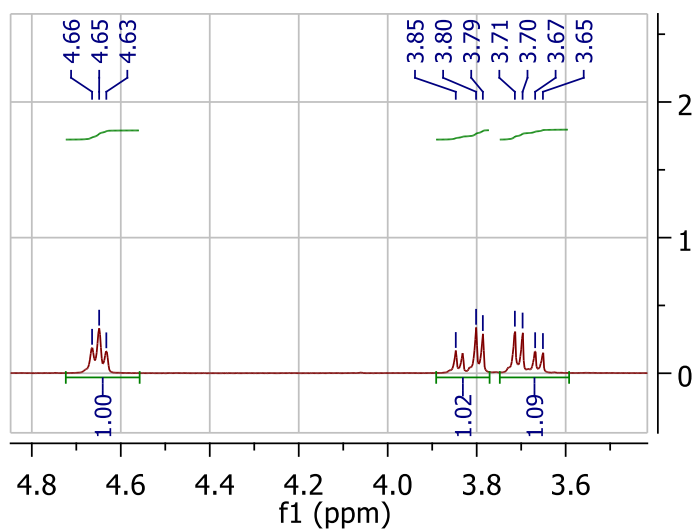

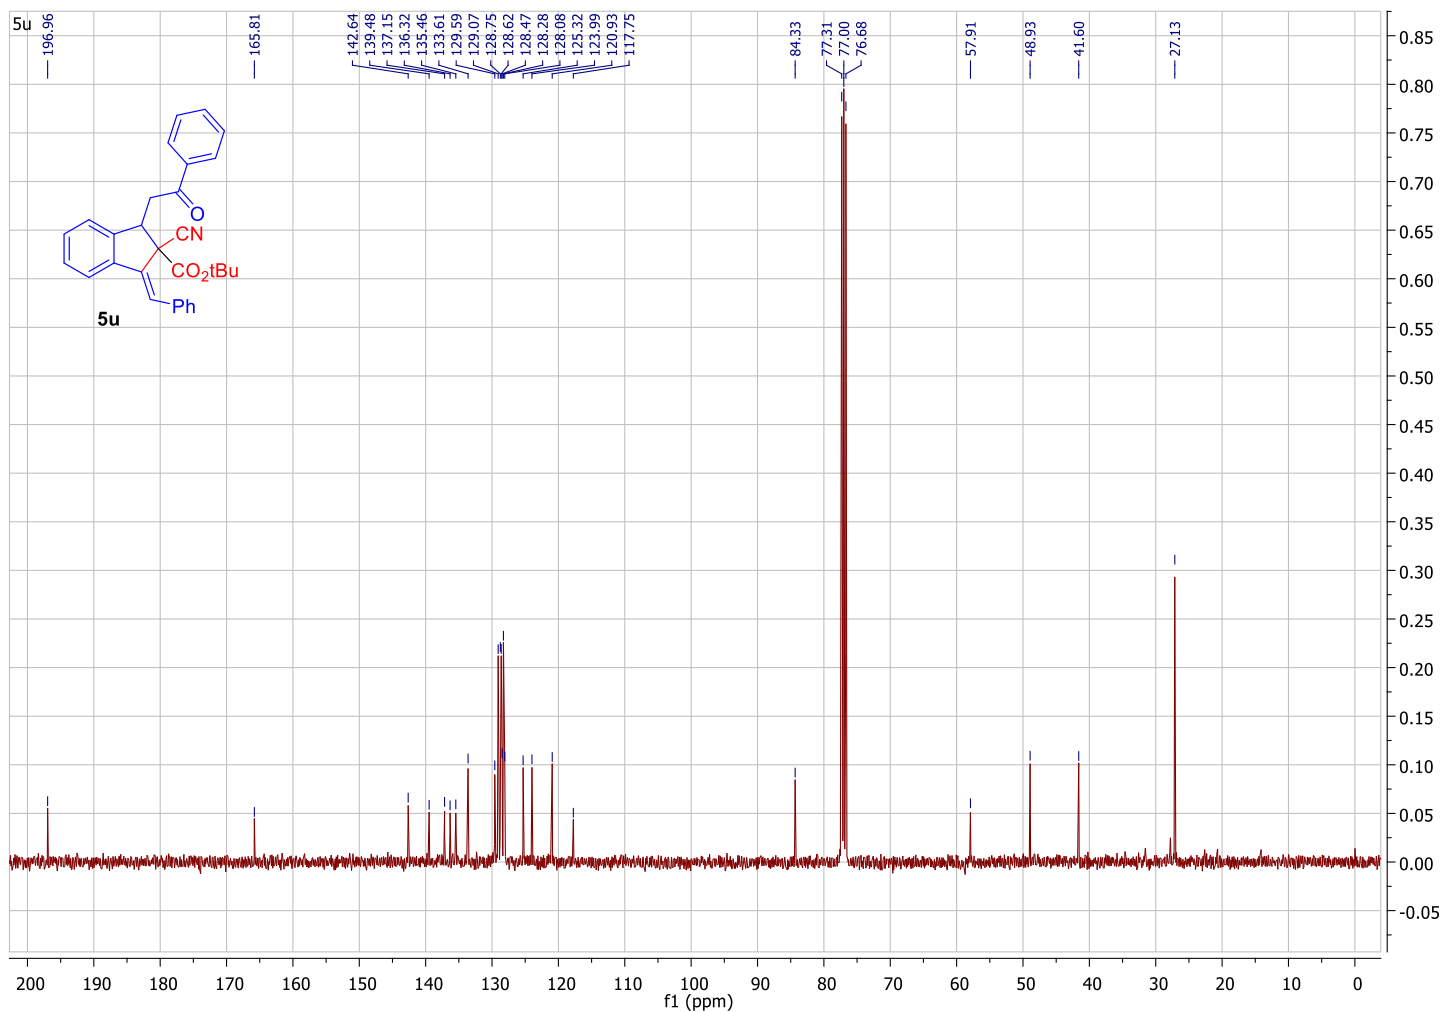

### HRMS: (5u)

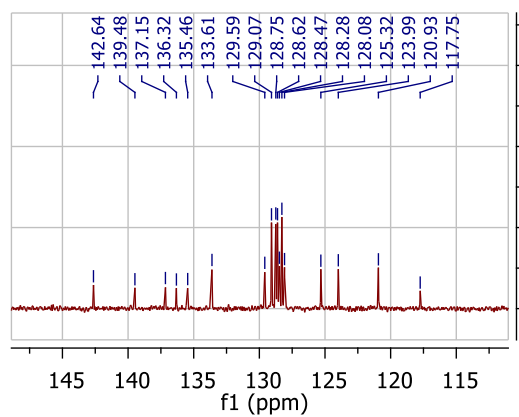

MFE MS Spectrum

x10<sup>5</sup> Cpd 4: C<sub>30</sub> H<sub>27</sub> N O<sub>3</sub>: +ESI MFE Spectrum (# 6-42) Frag=135.0V TC-637.d

472.1872  
([C<sub>30</sub> H<sub>27</sub> N O<sub>3</sub>]+Na)<sup>+</sup>

Counts vs. Mass-to-Charge (m/z)

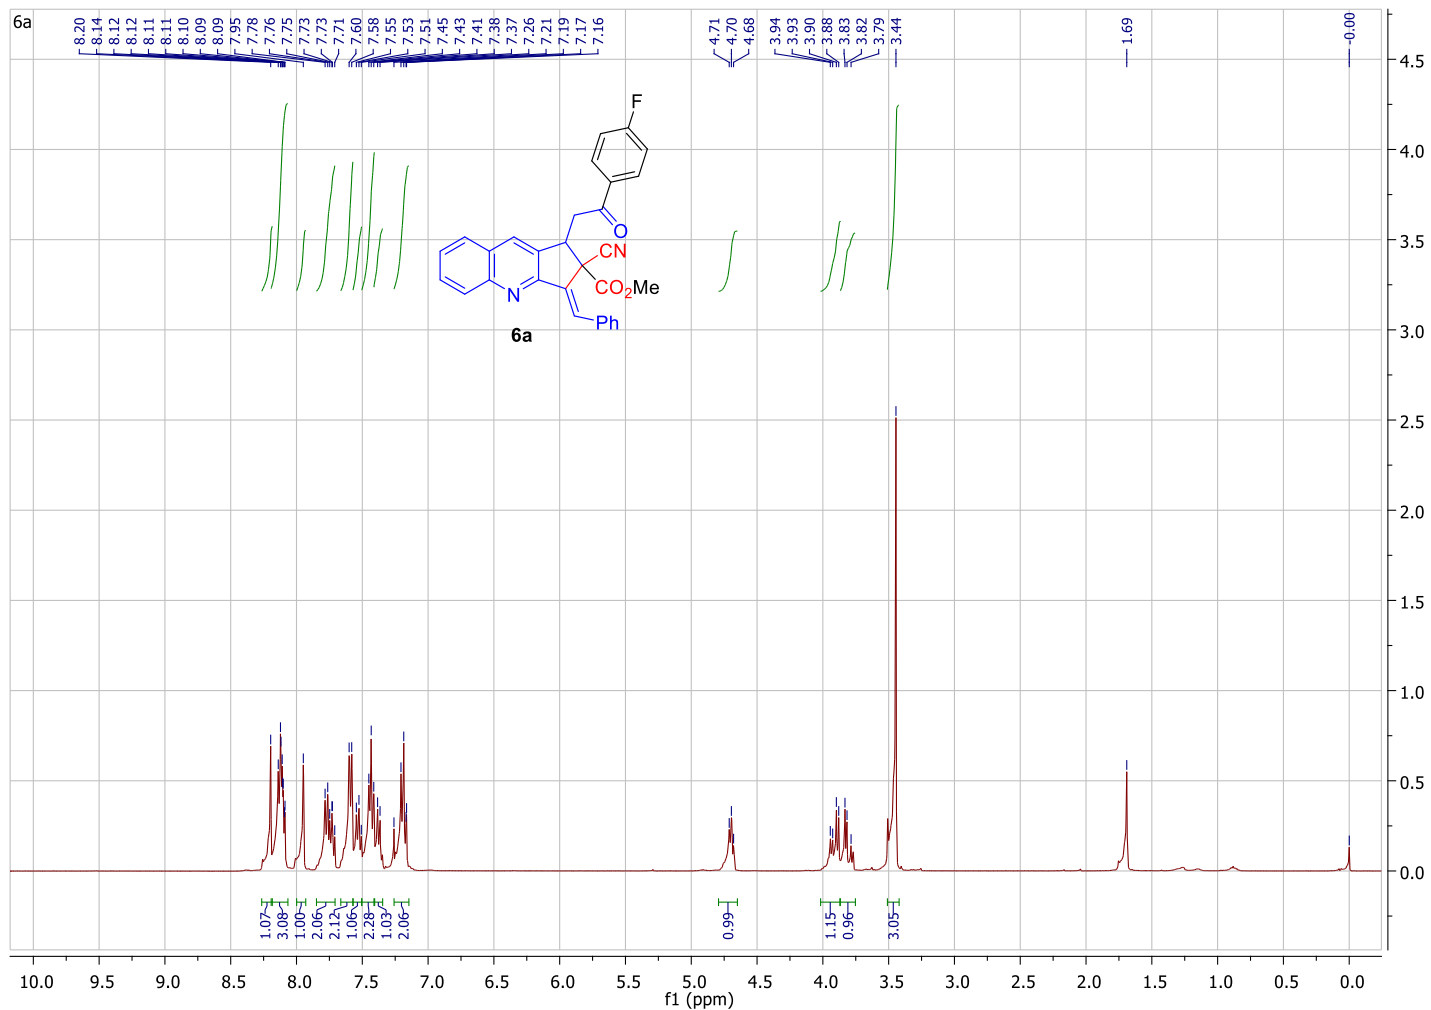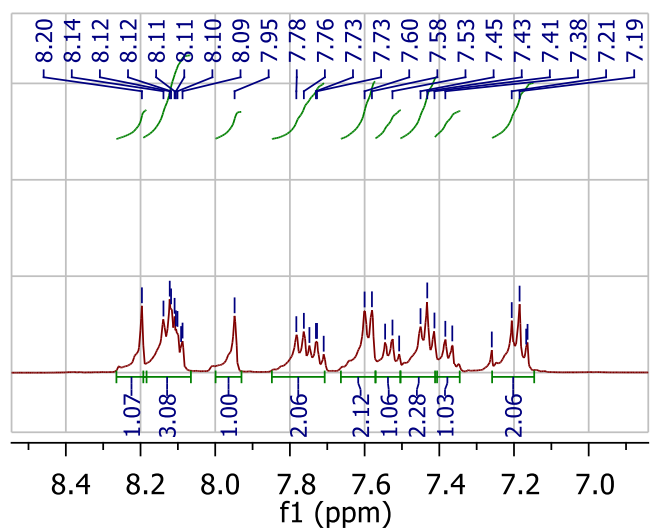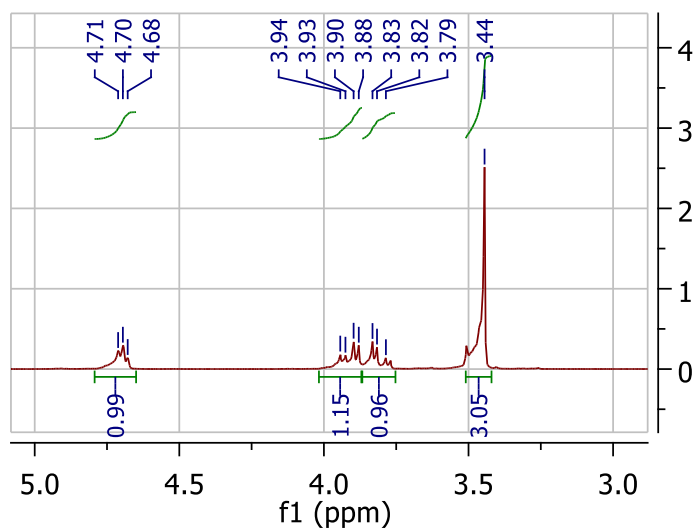

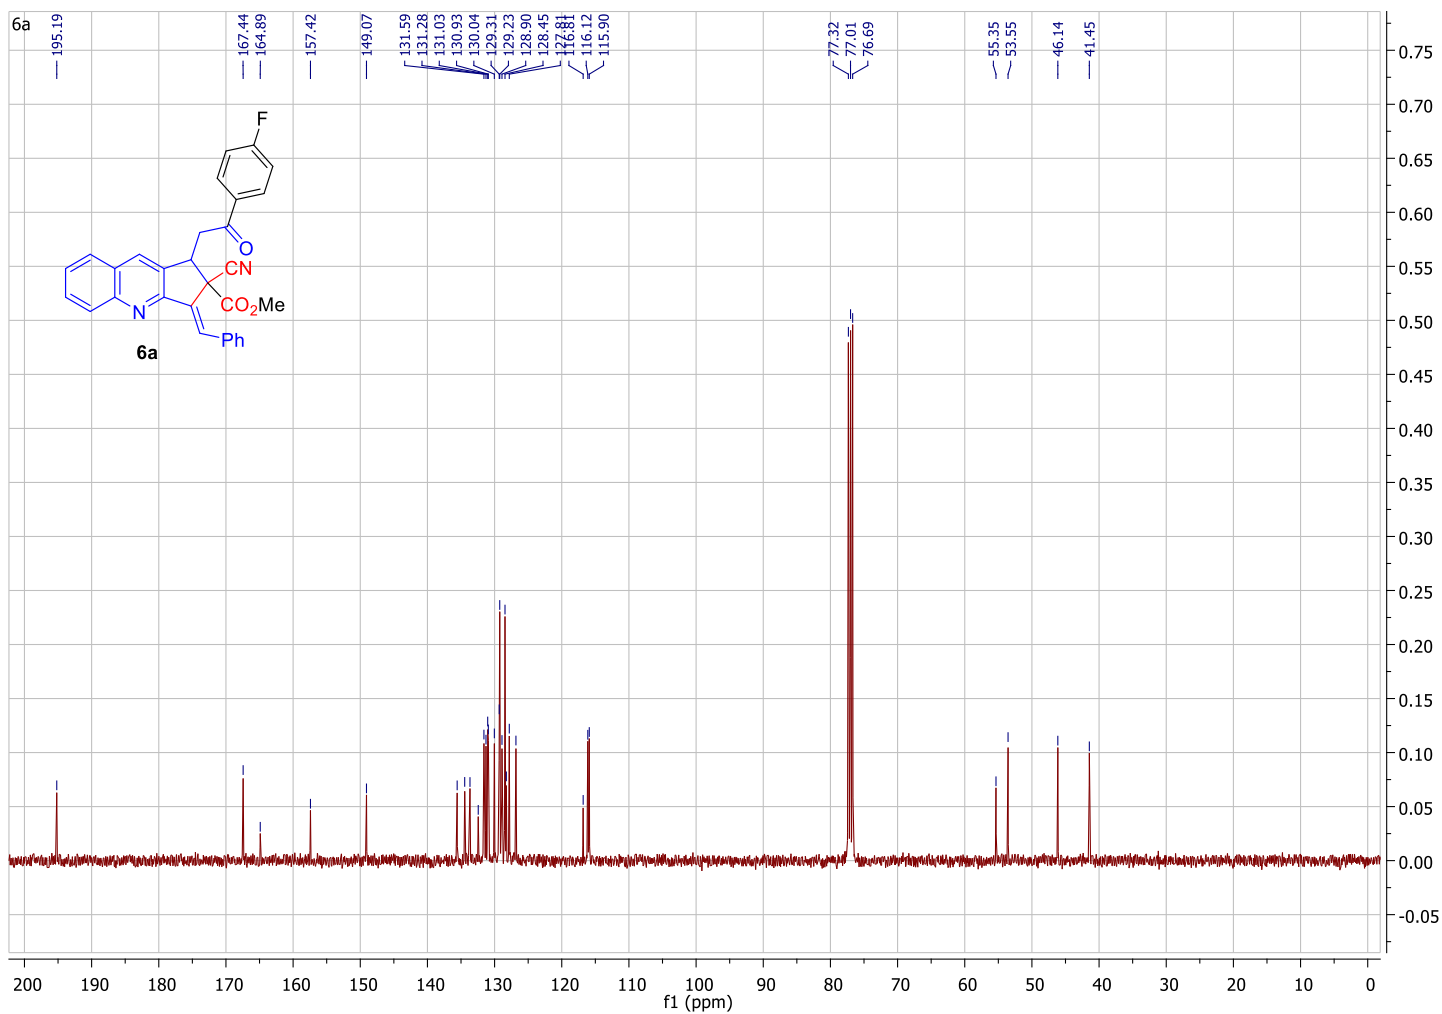

### HRMS: (6a)

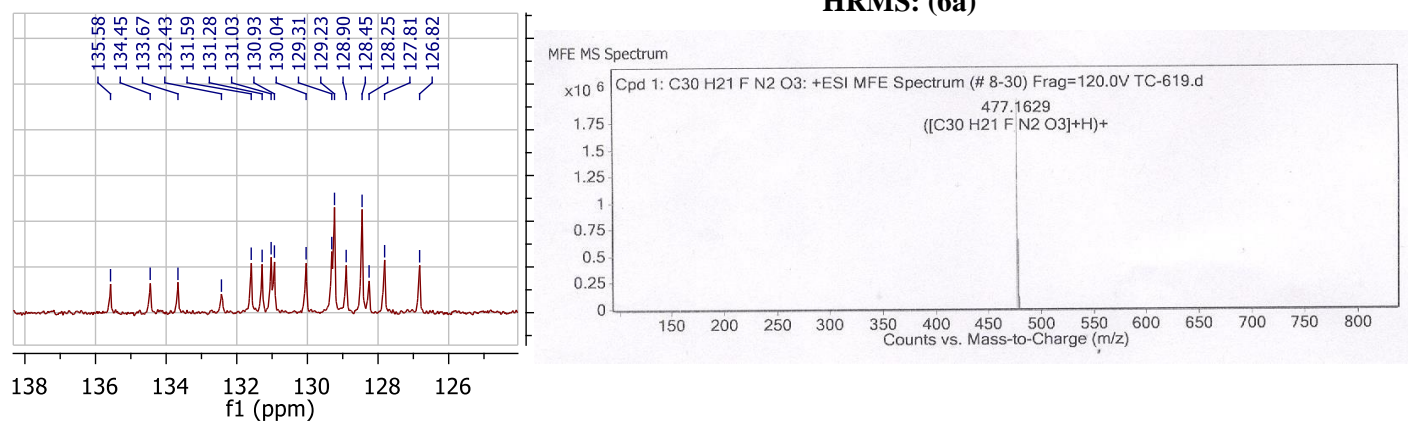

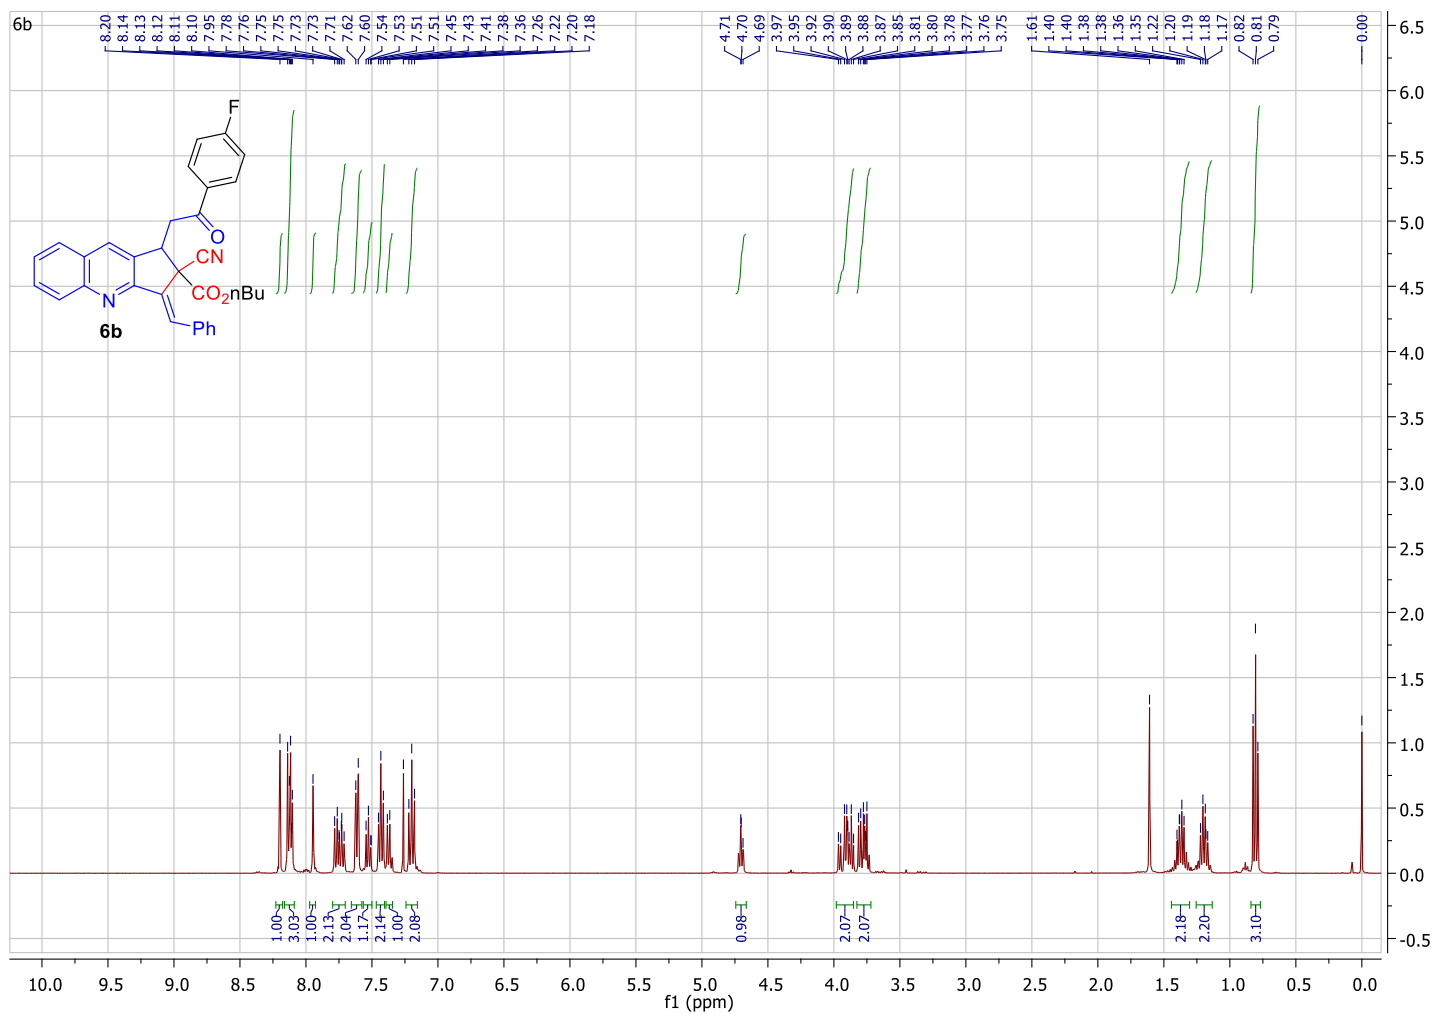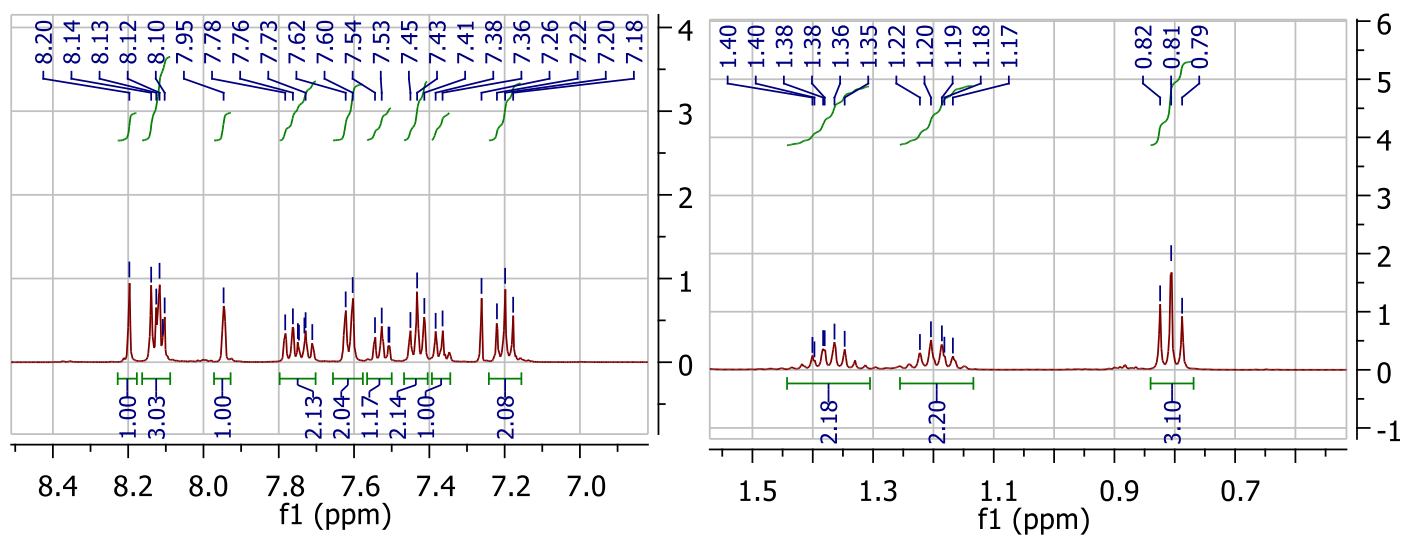



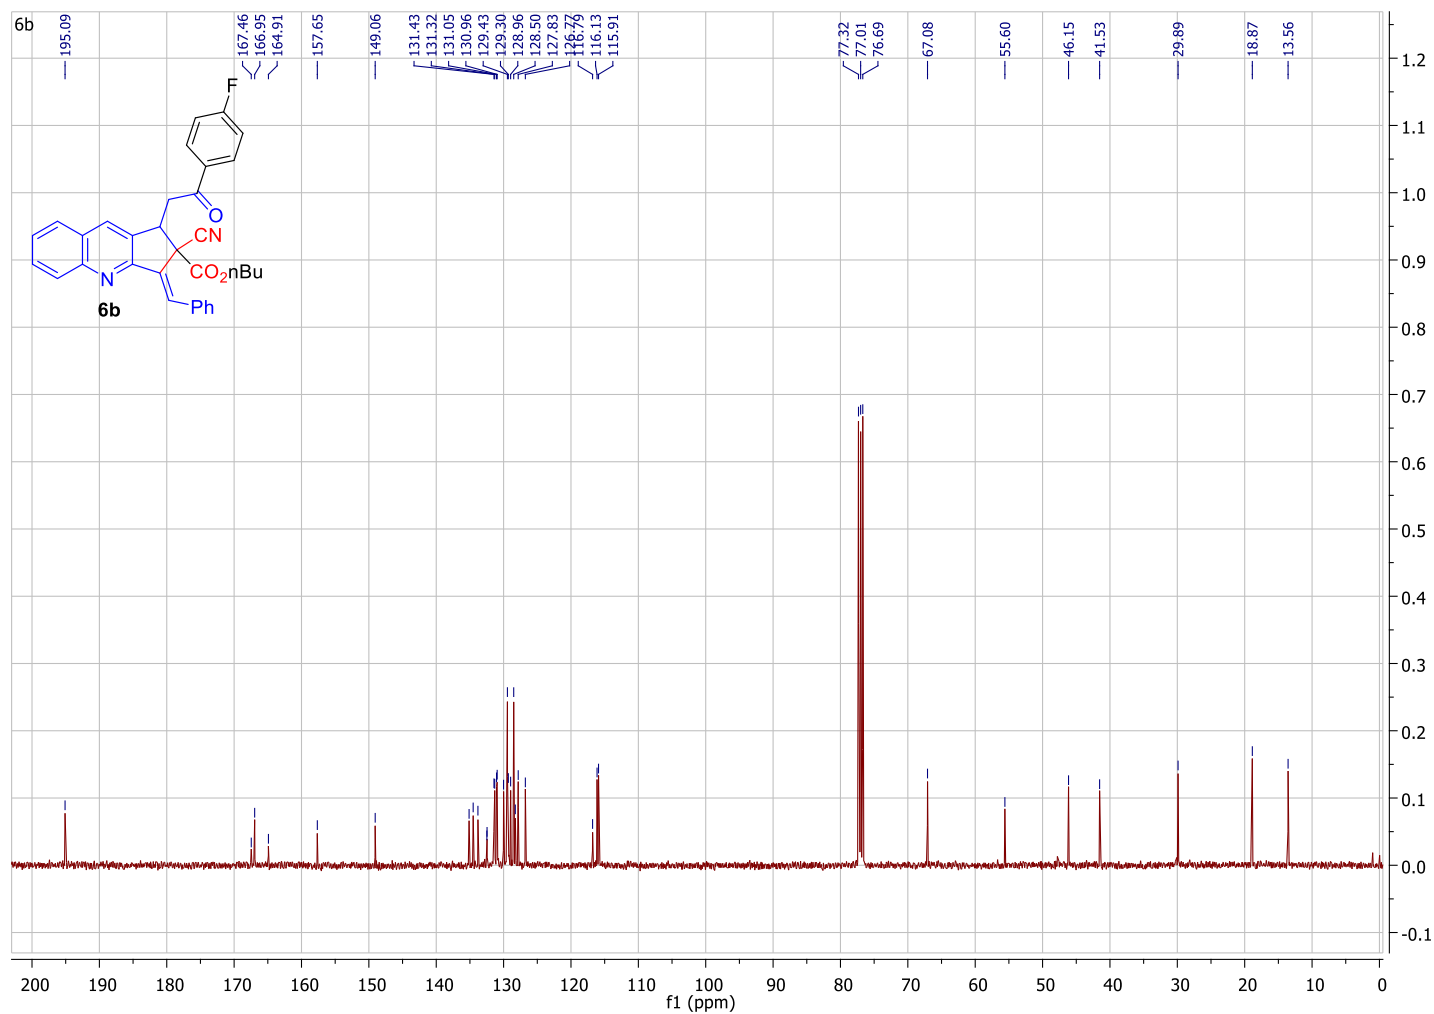

HRMS: (6b)

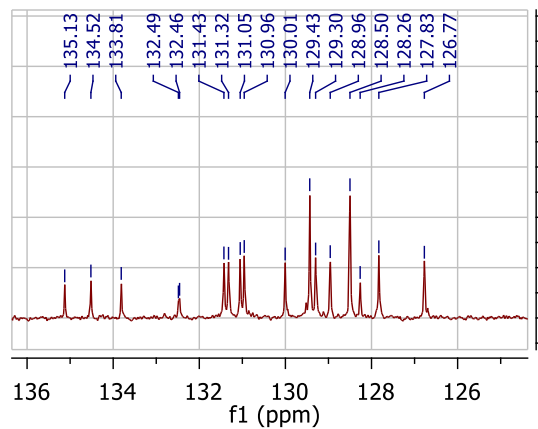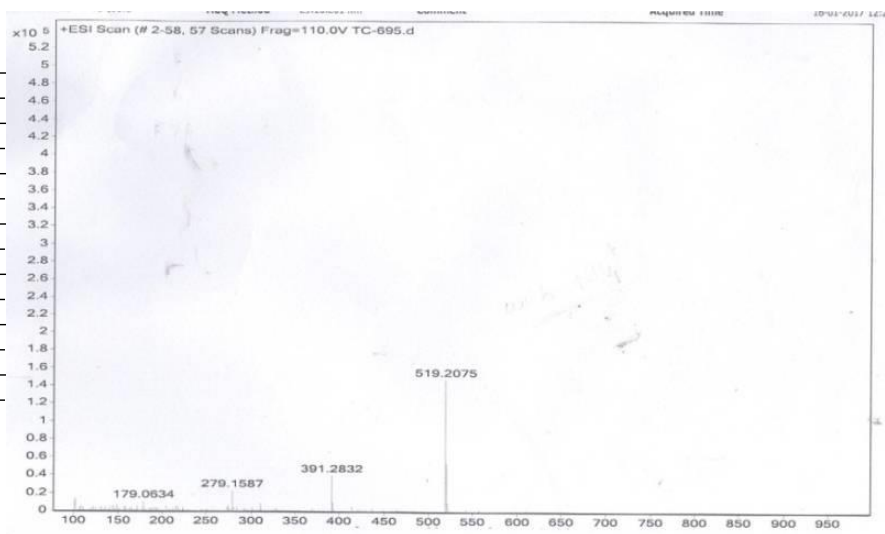

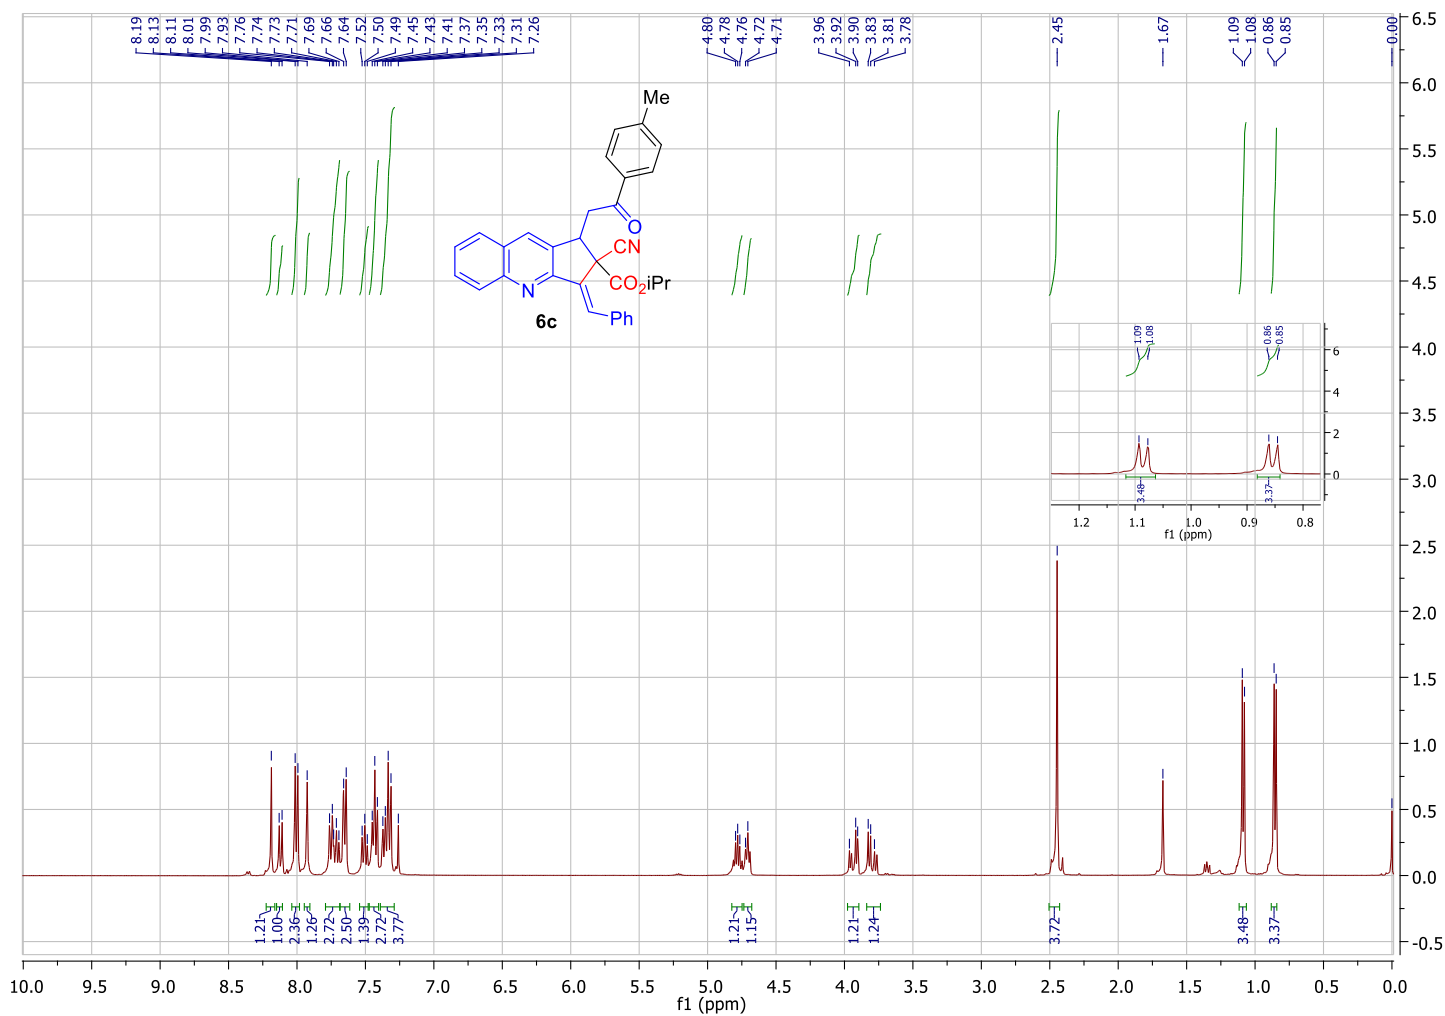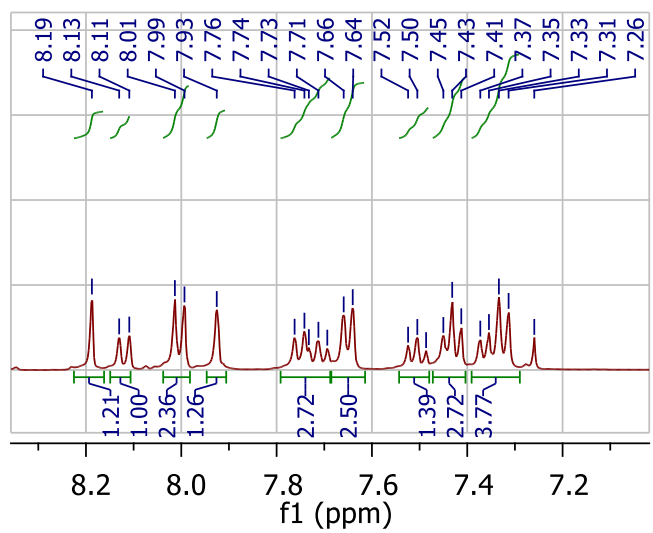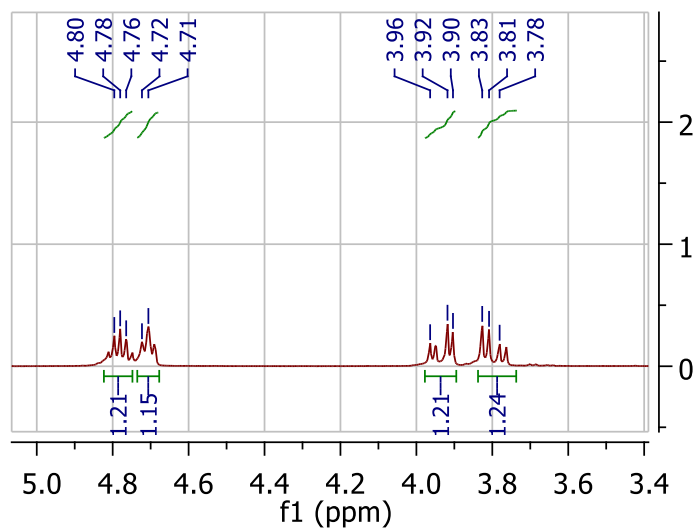

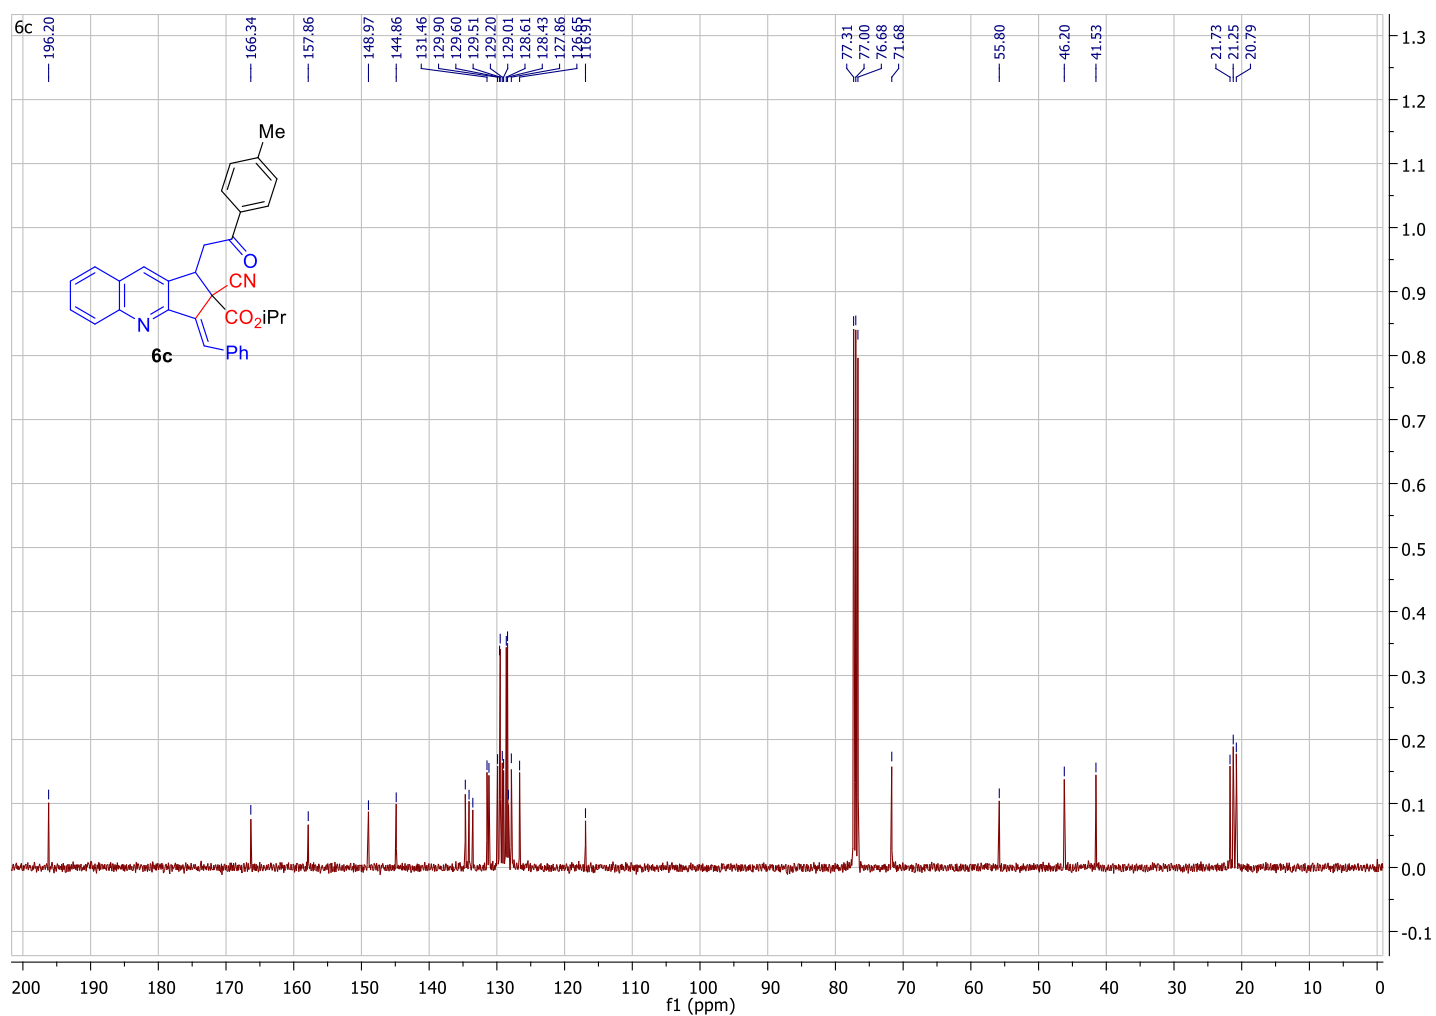

### HRMS: (6c)

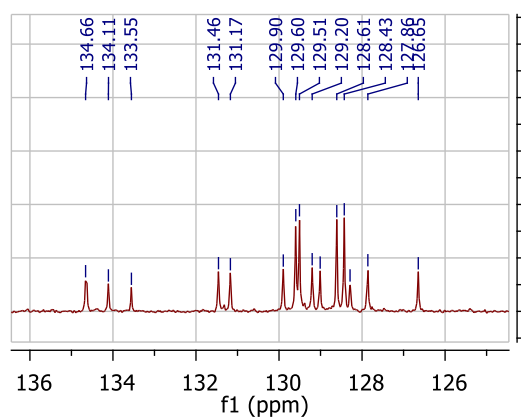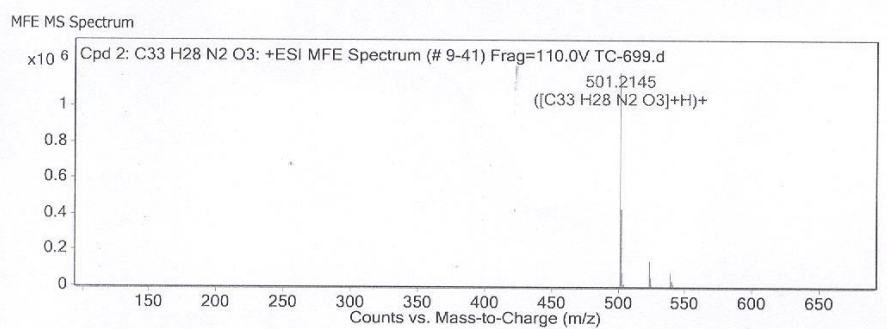

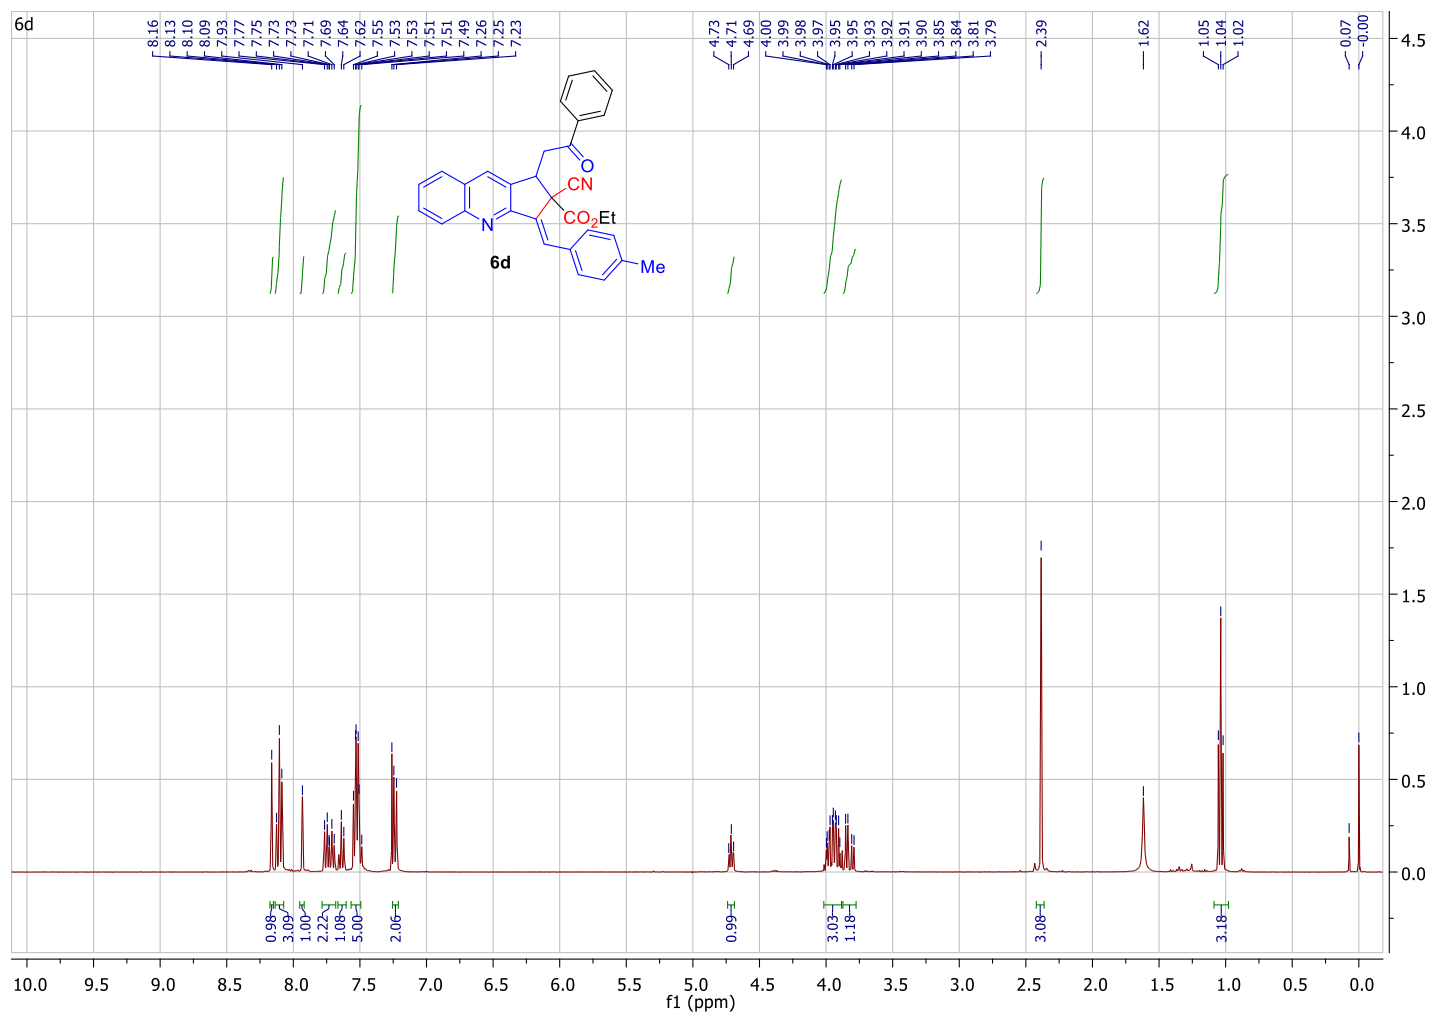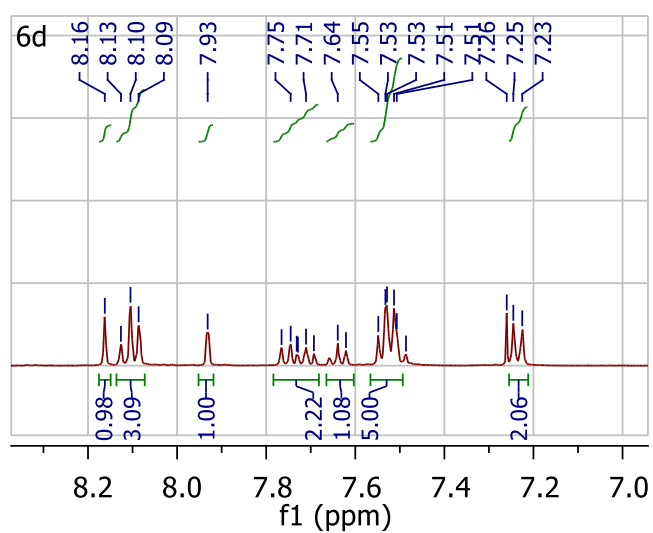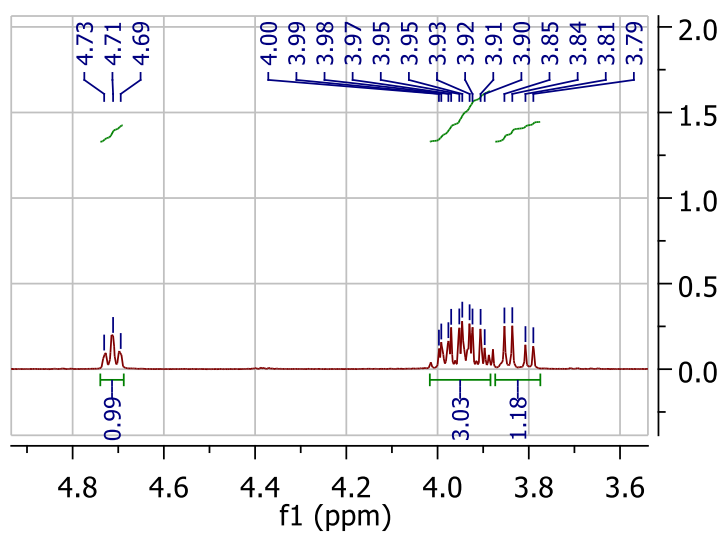

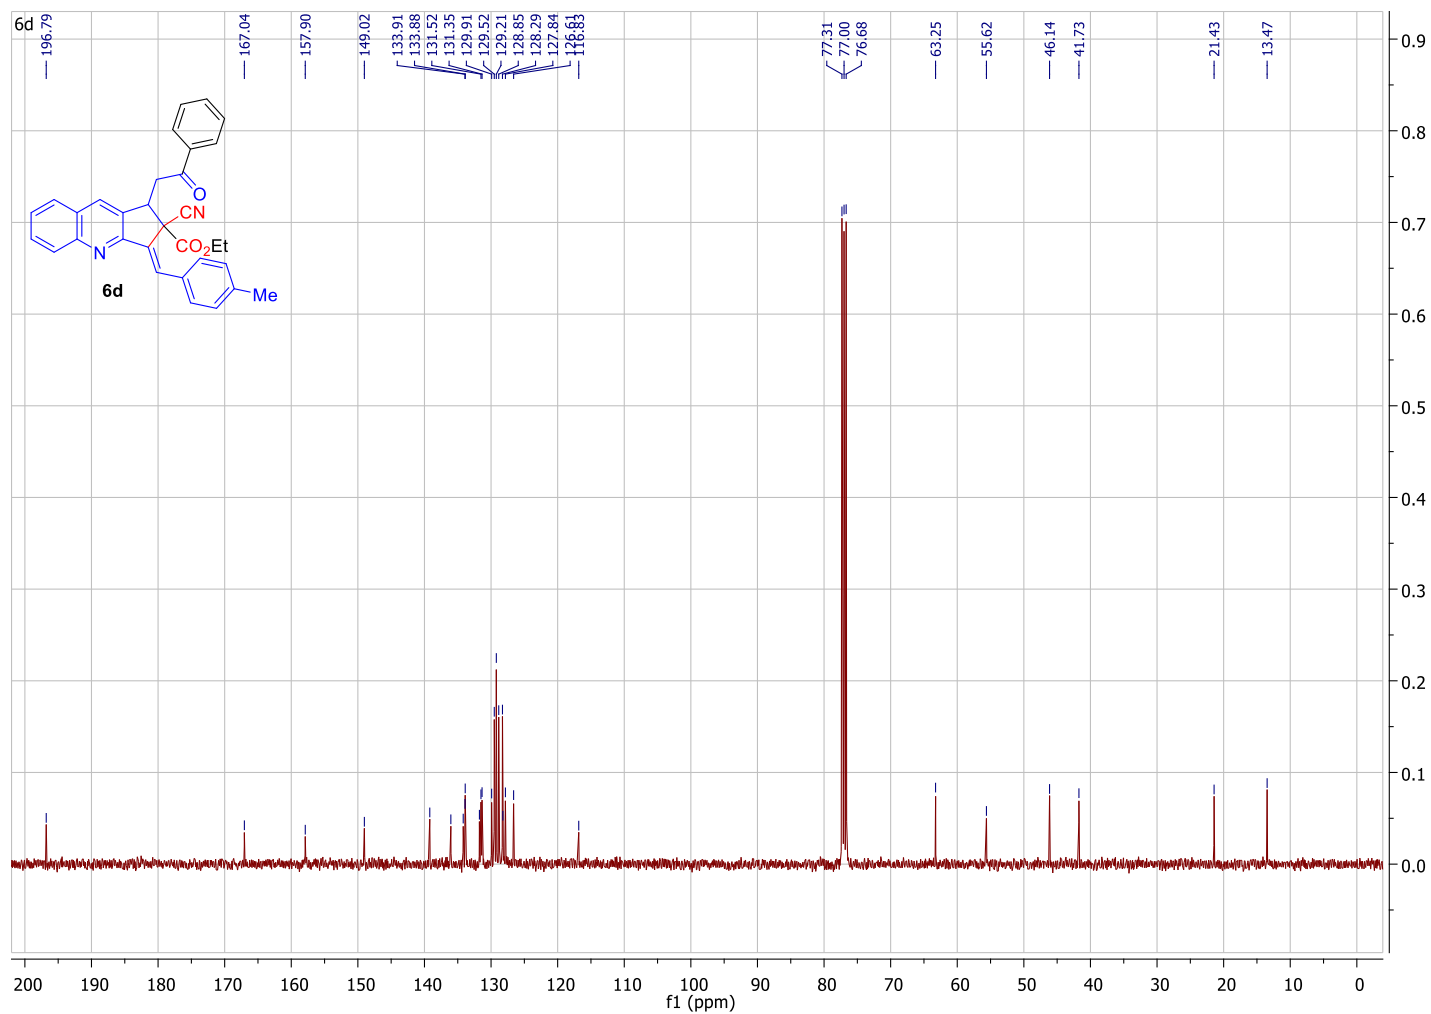

### HRMS: (6d)

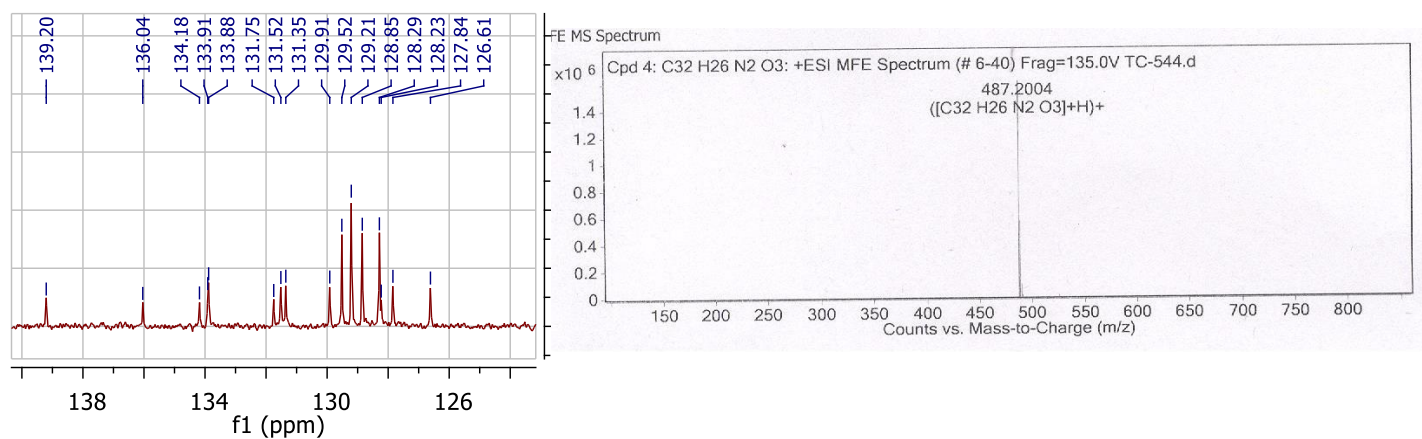

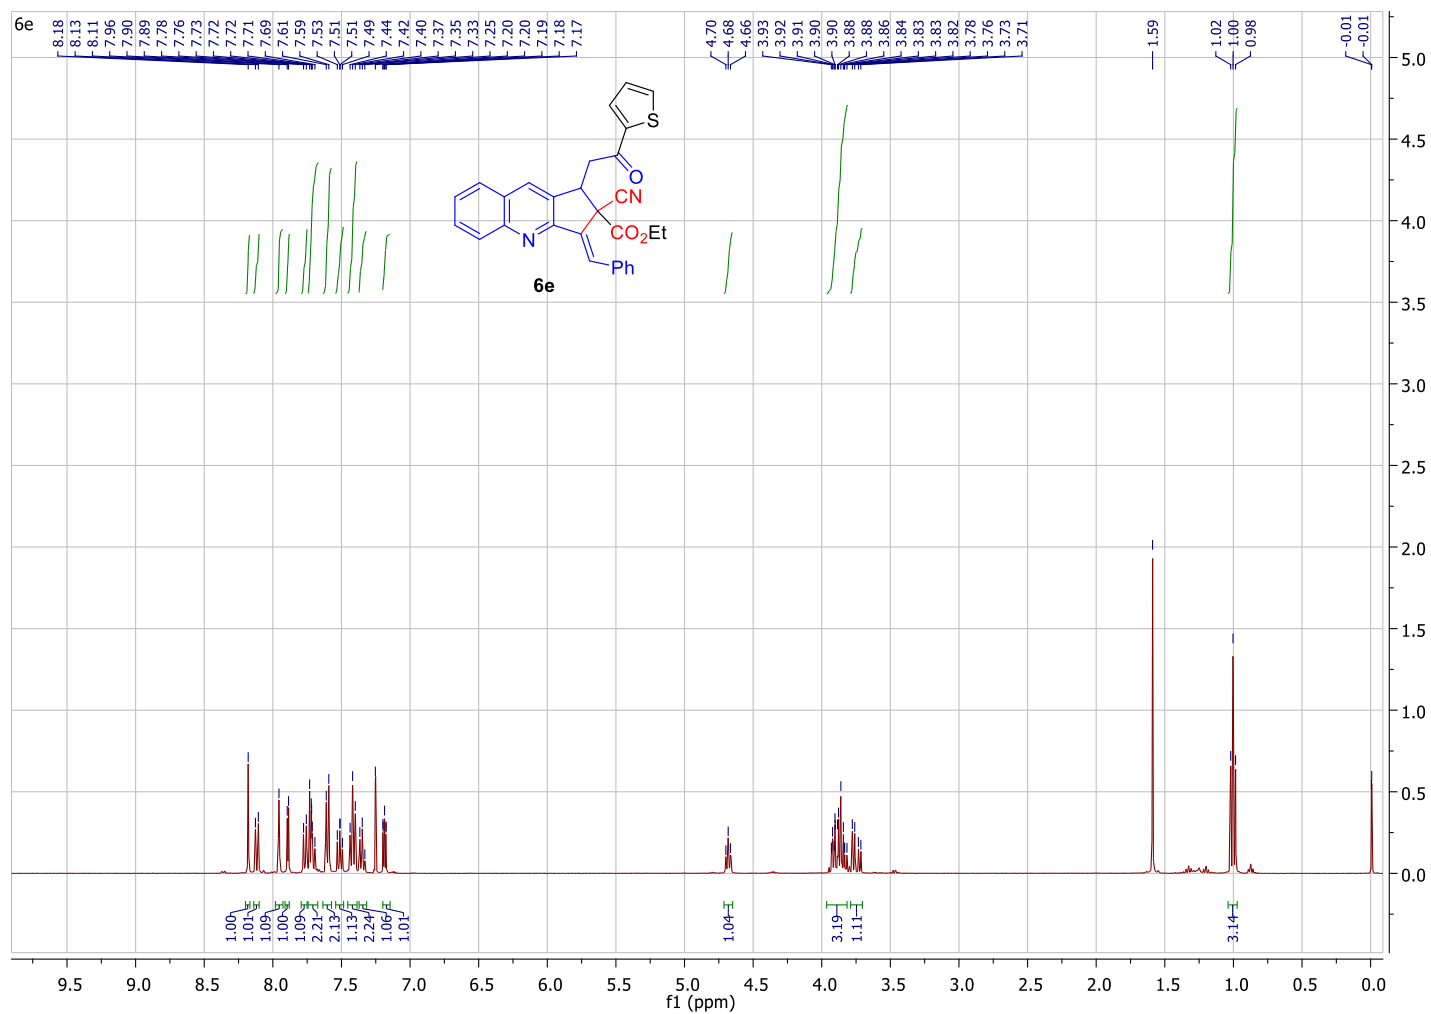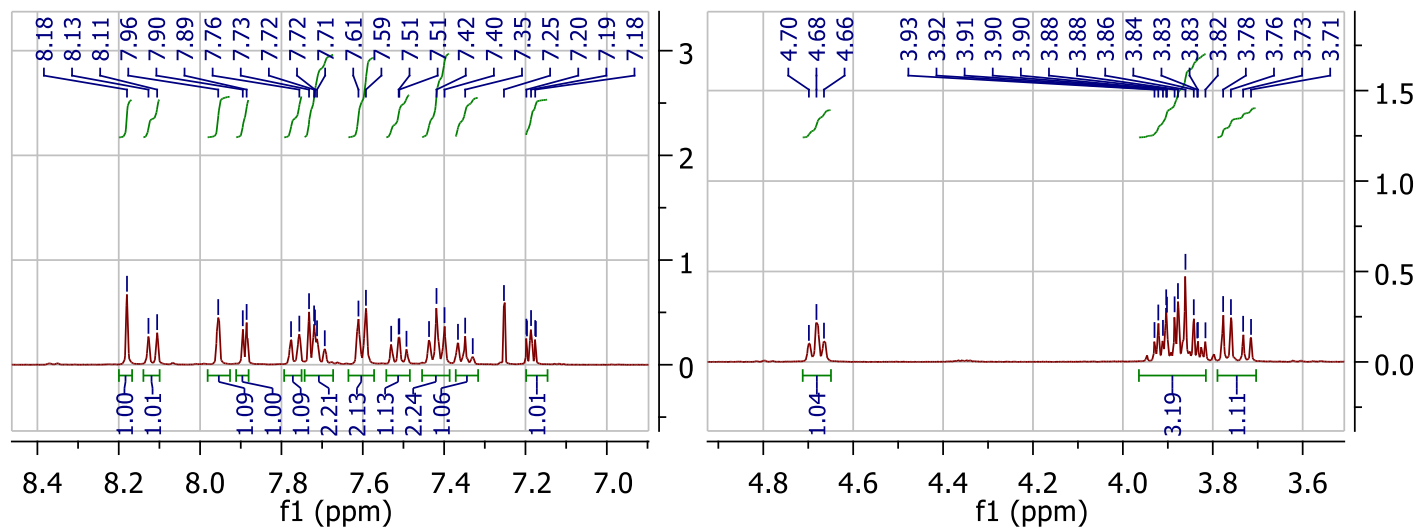

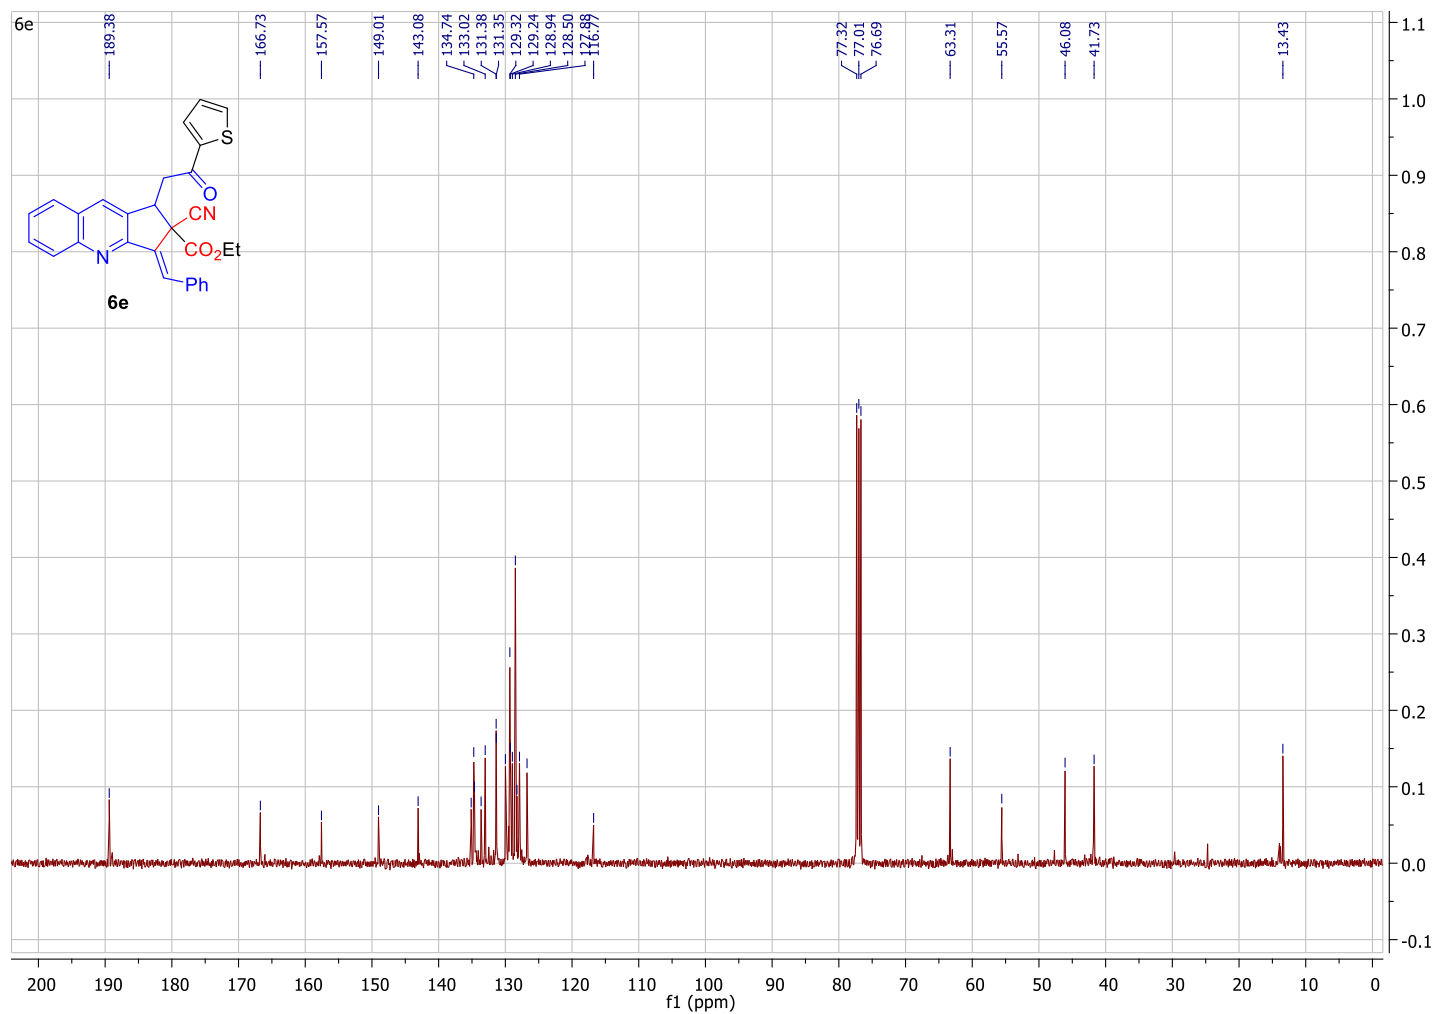

HRMS: (6e)

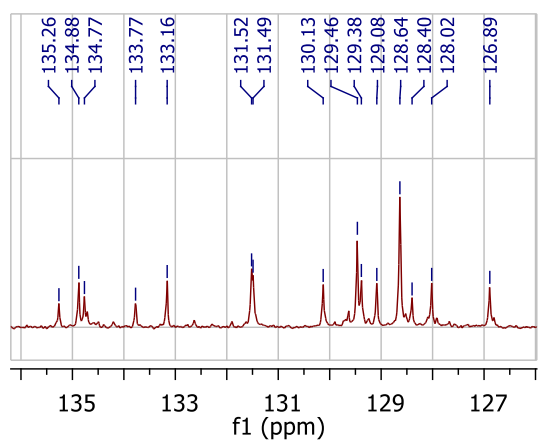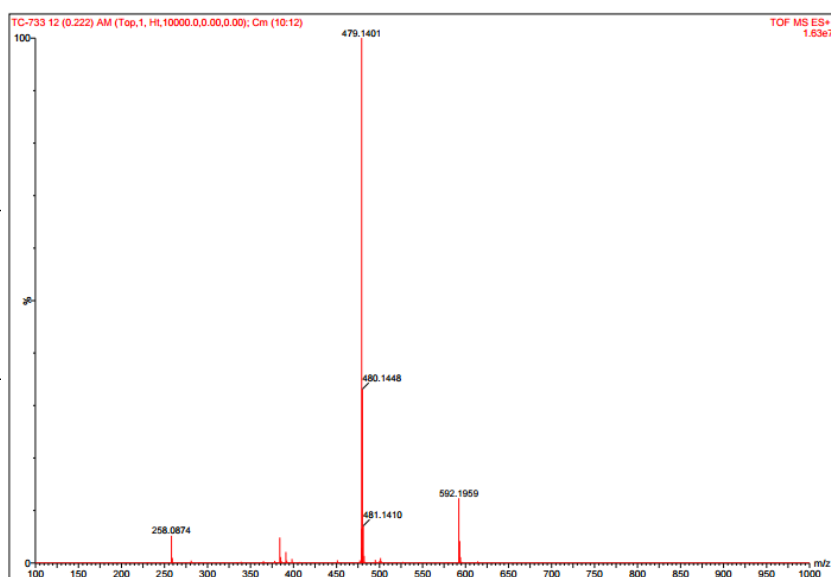

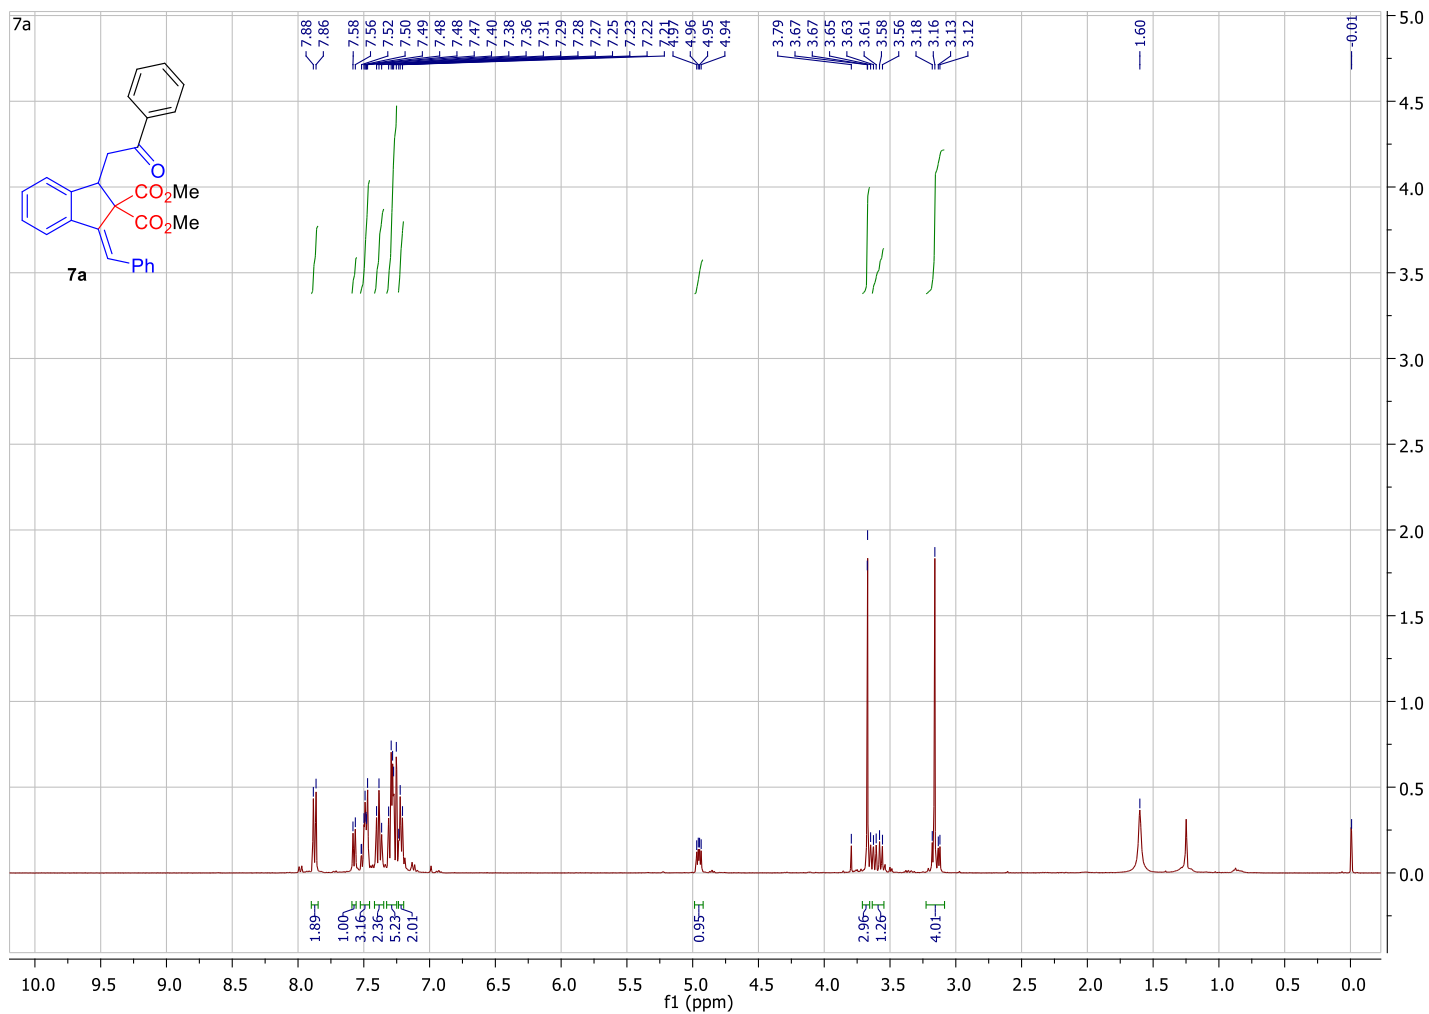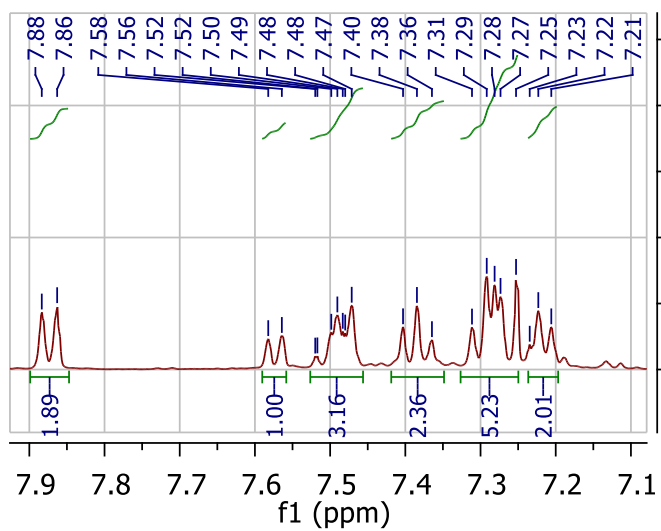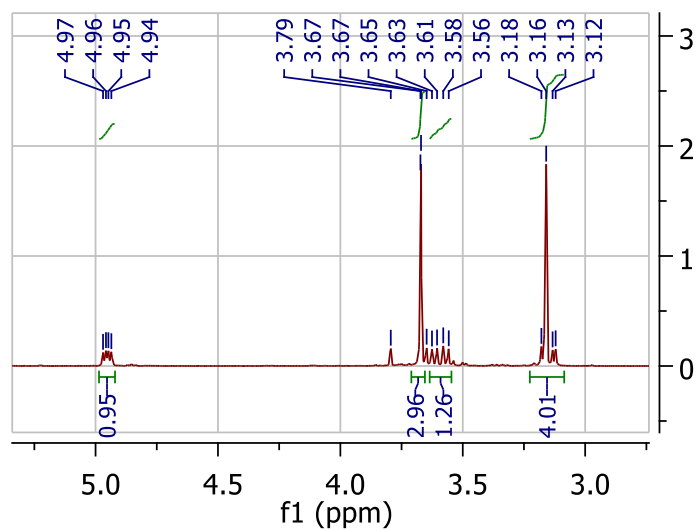



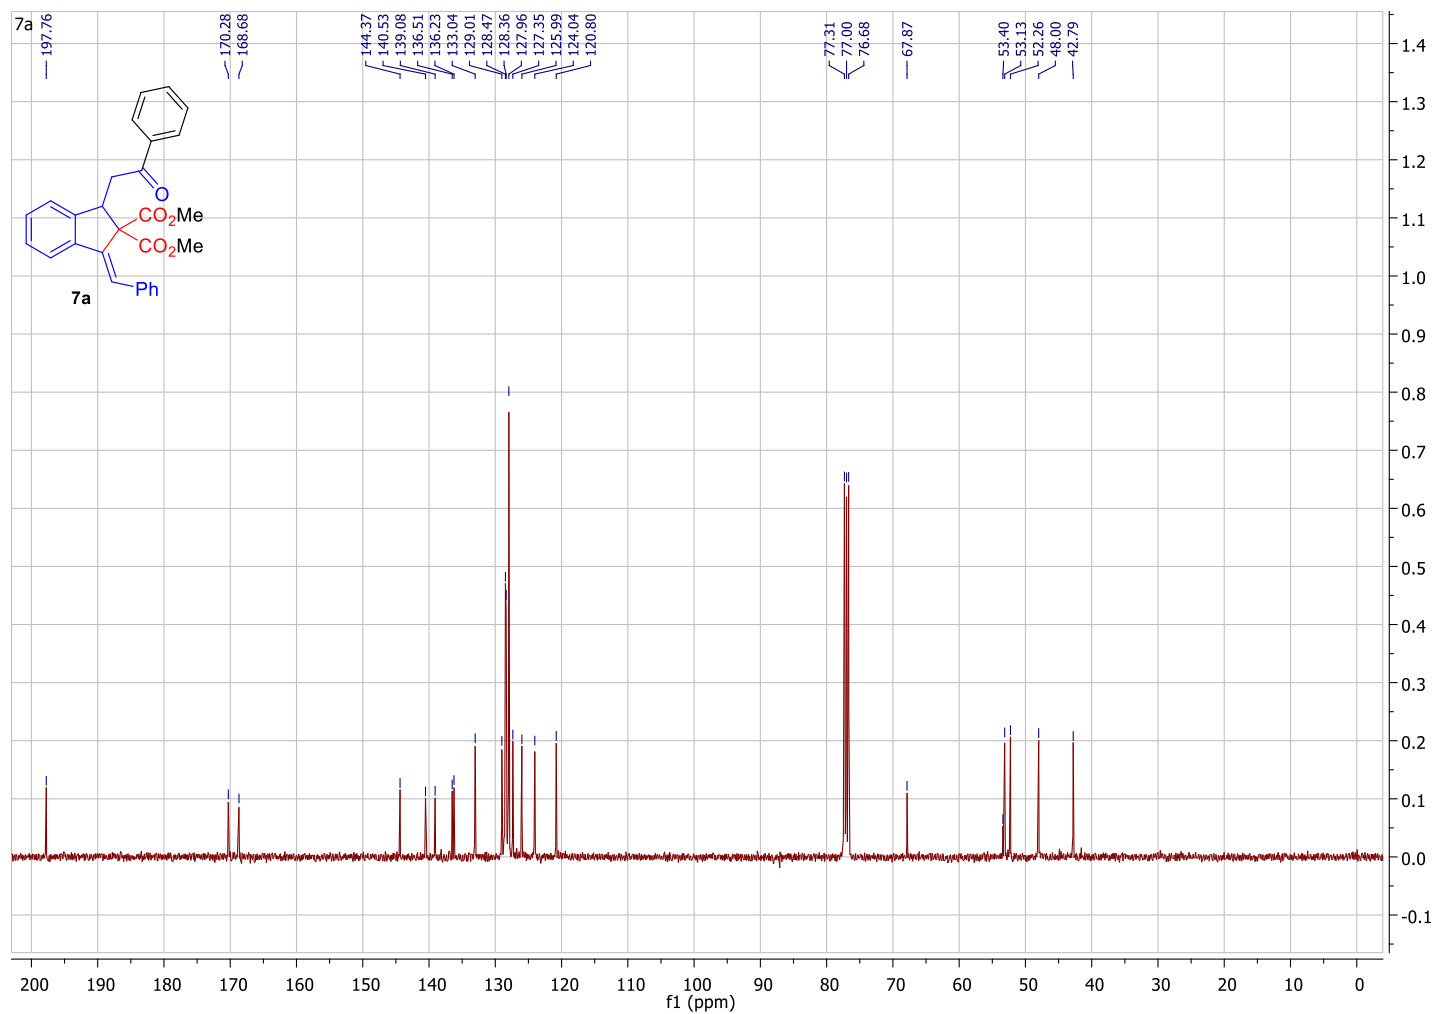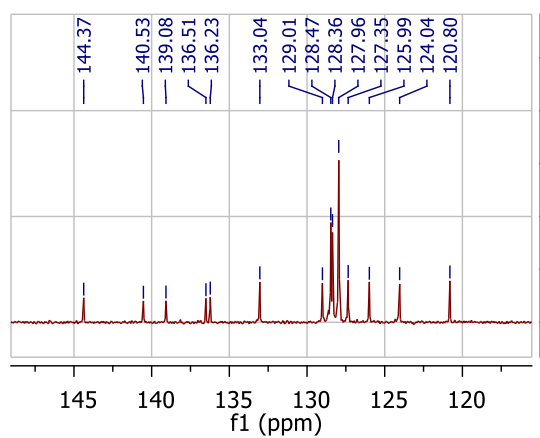

### HRMS: (7a)

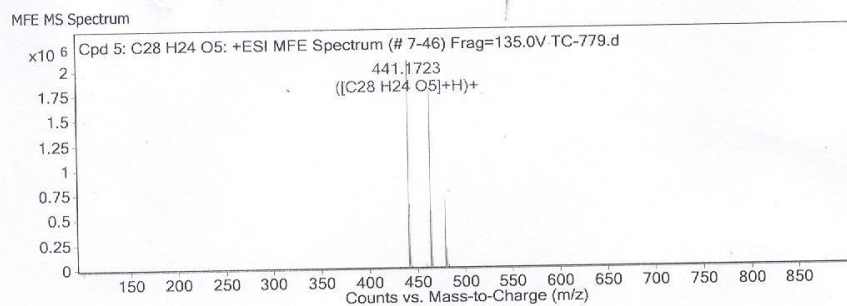

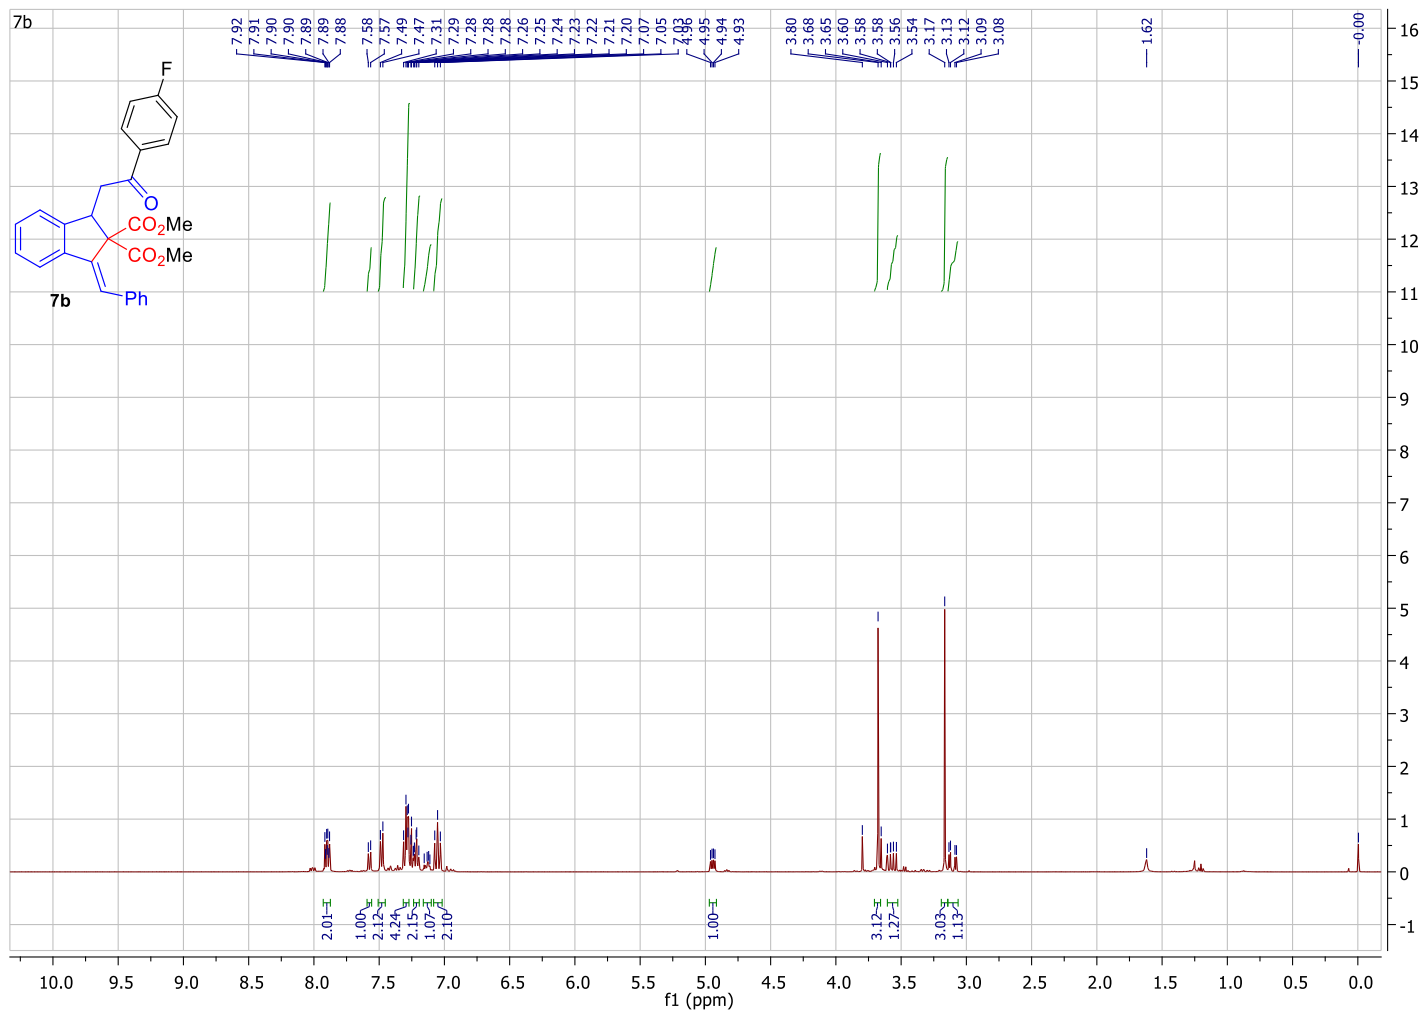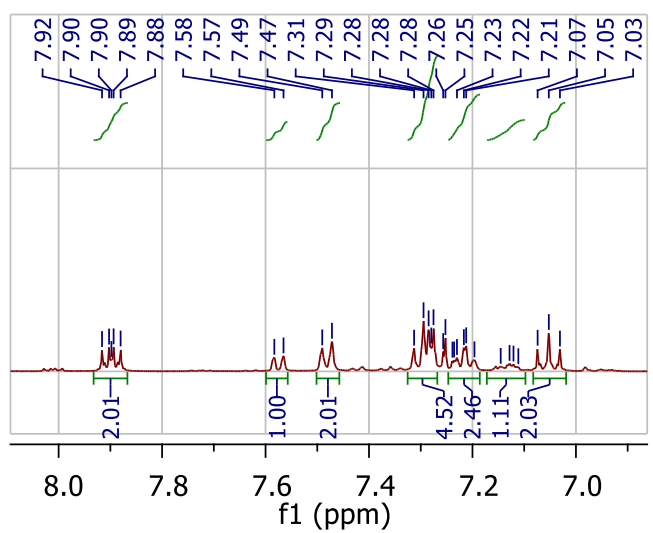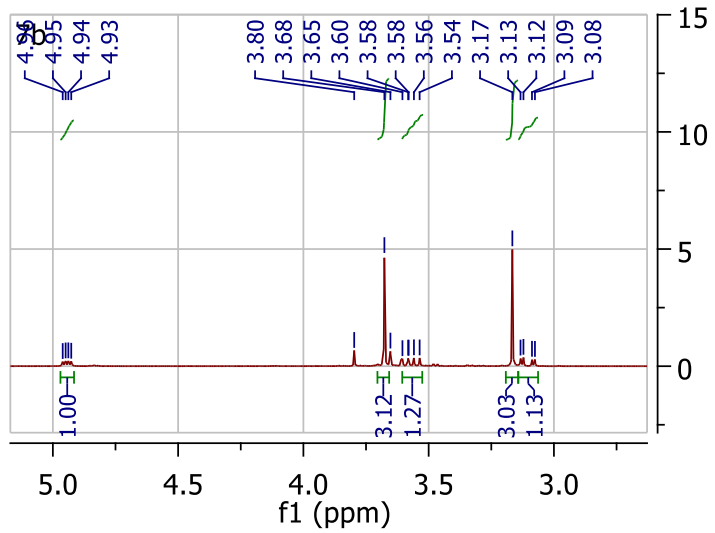

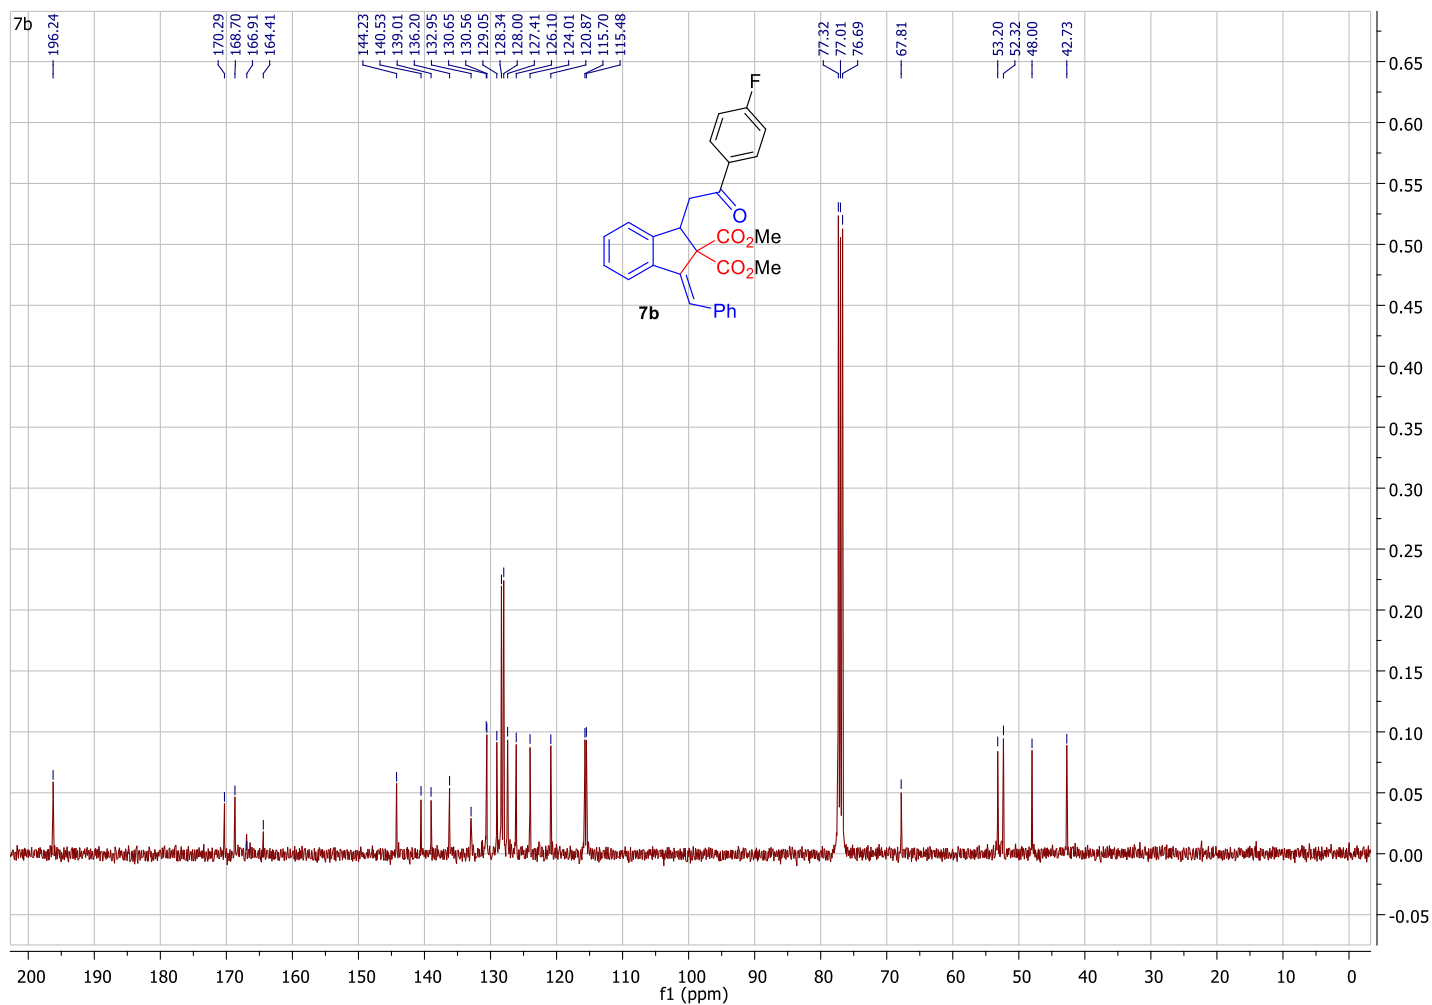

### HRMS: (7b)

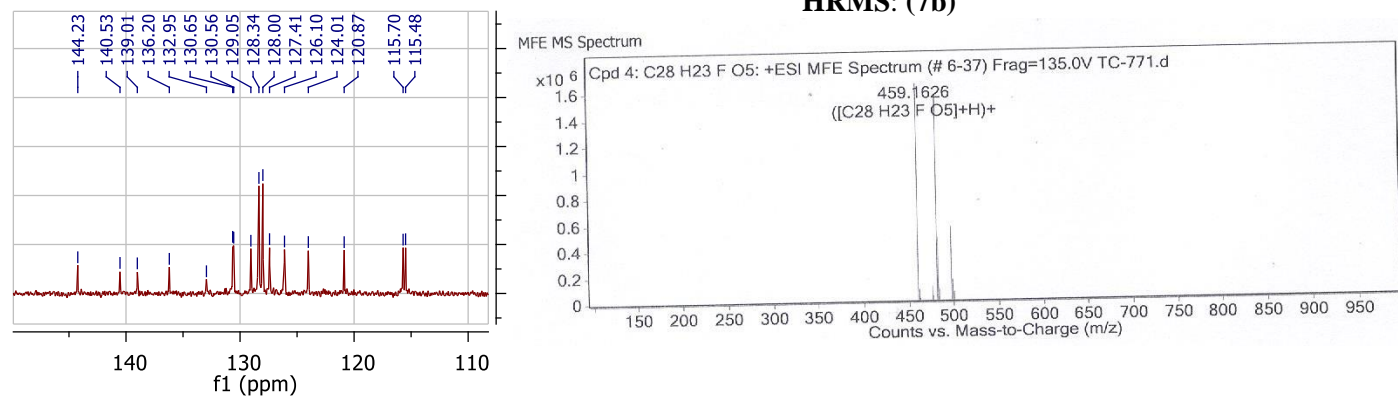

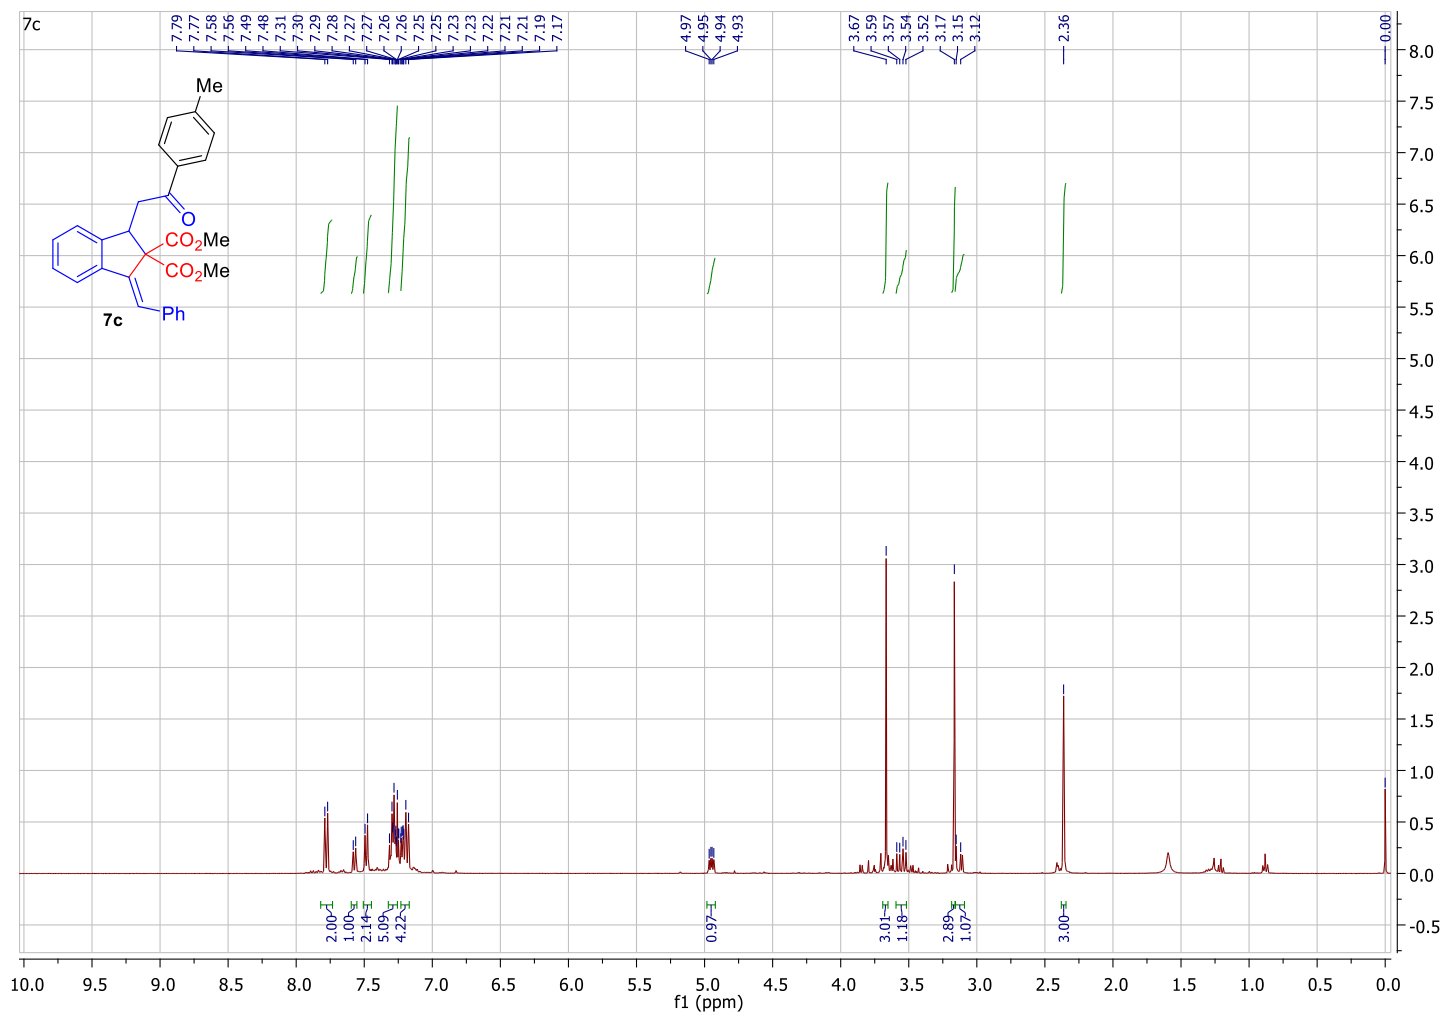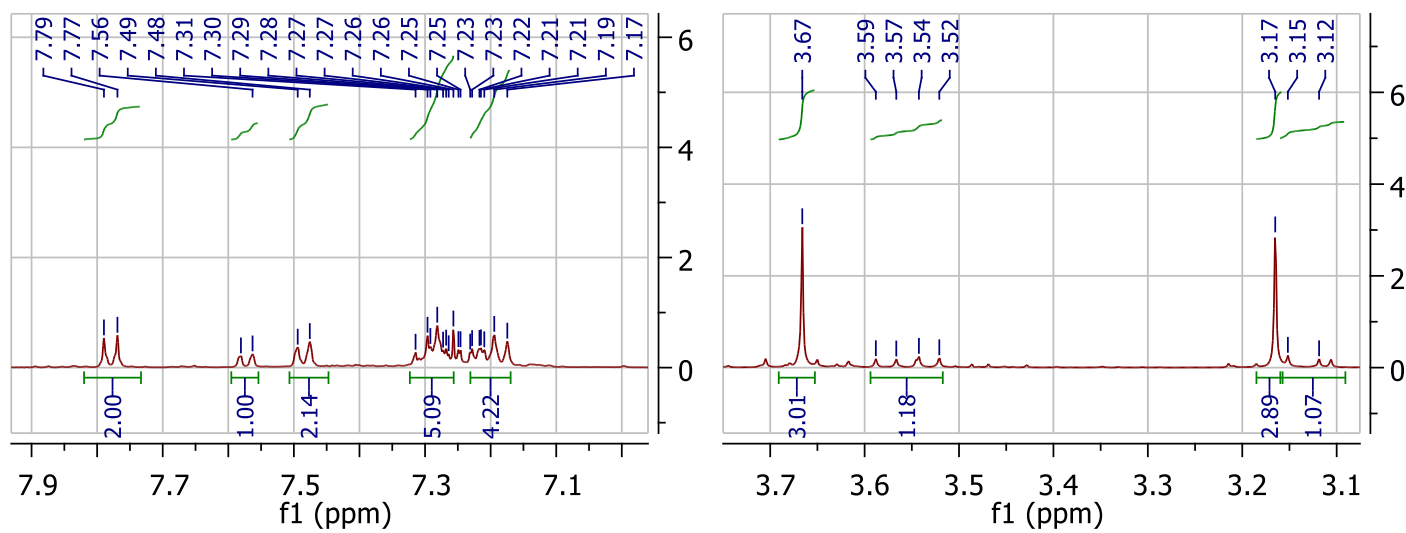

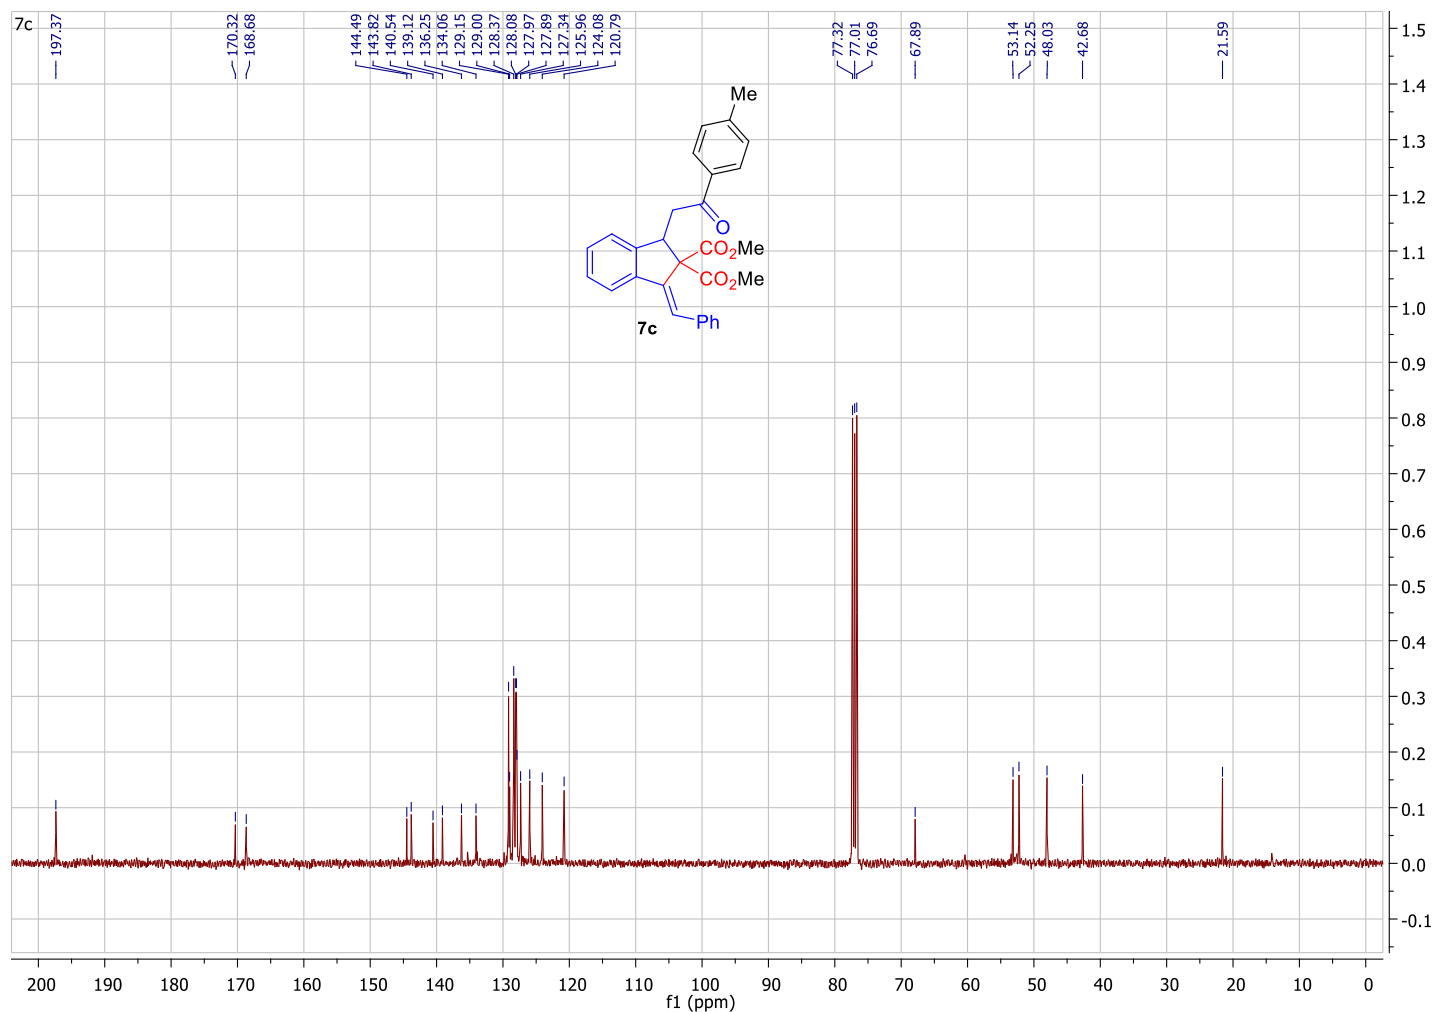

### HRMS: (7c)

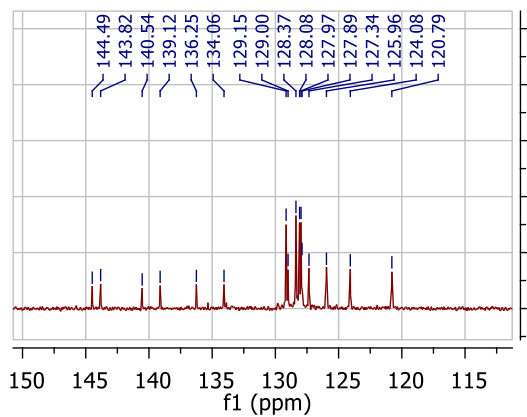

#### MFE MS Spectrum

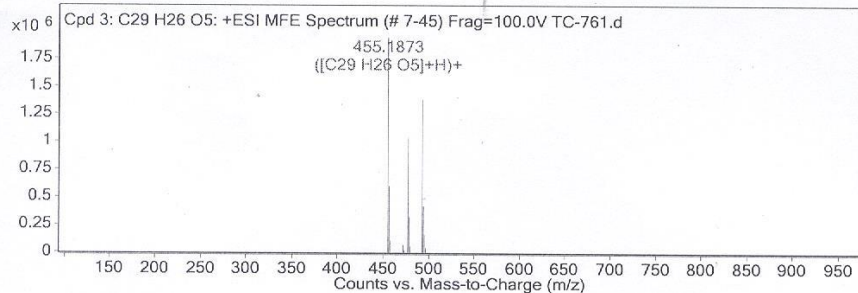

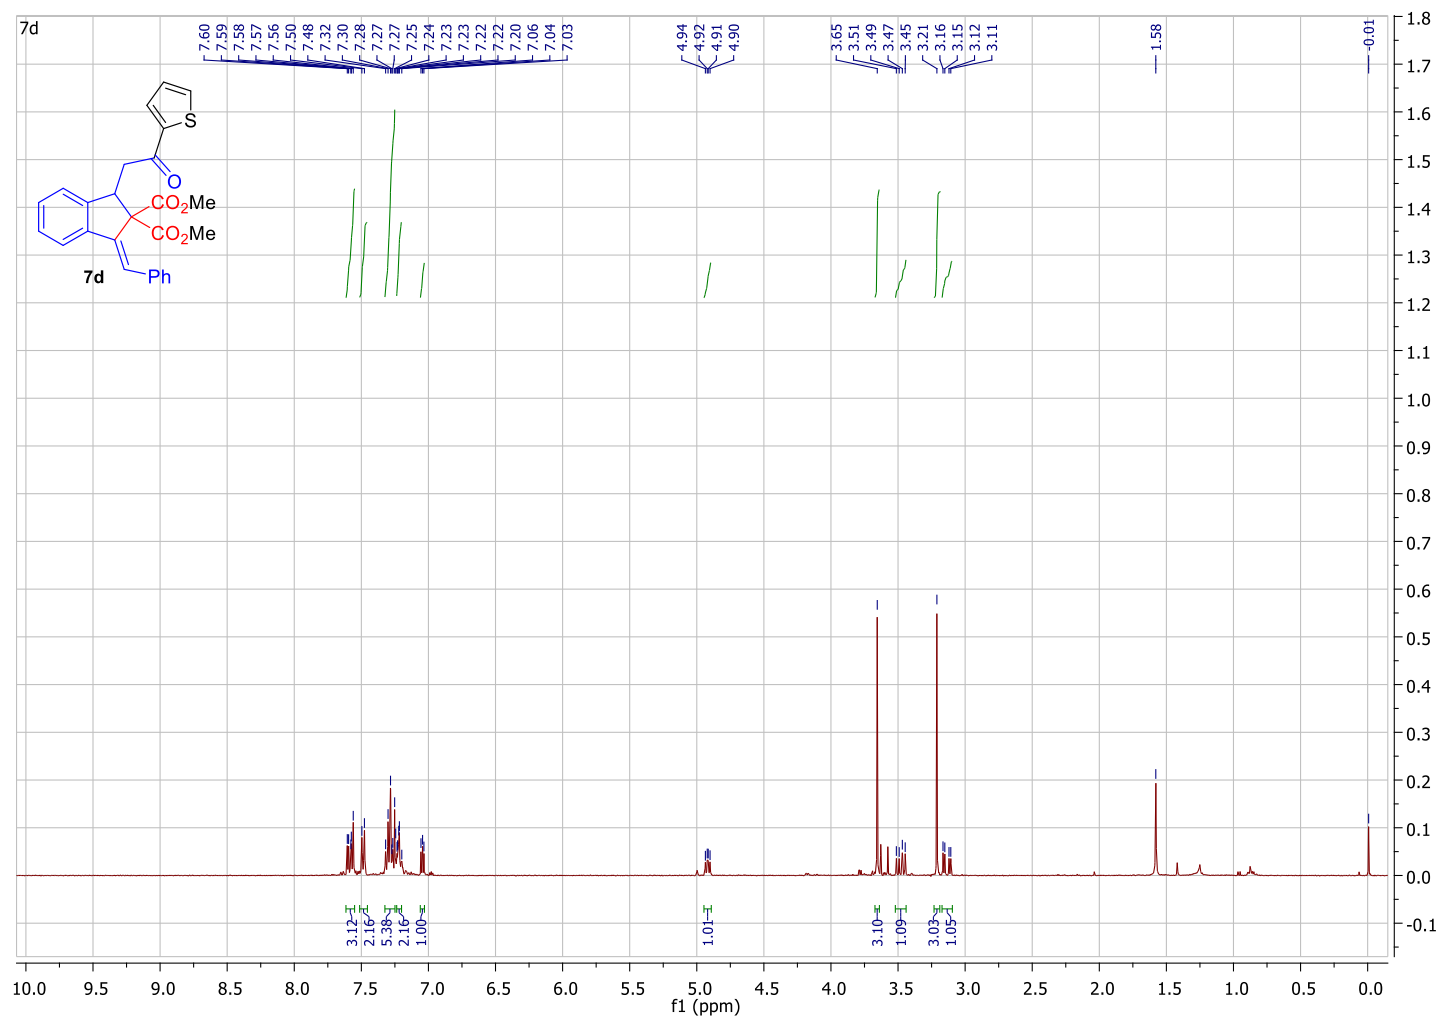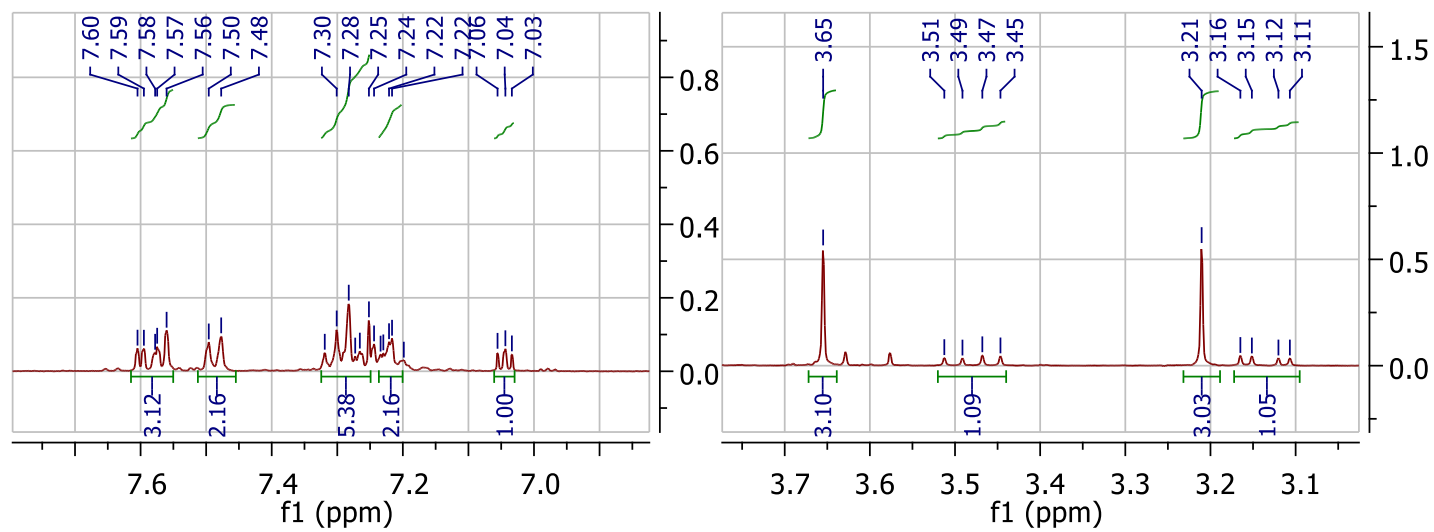

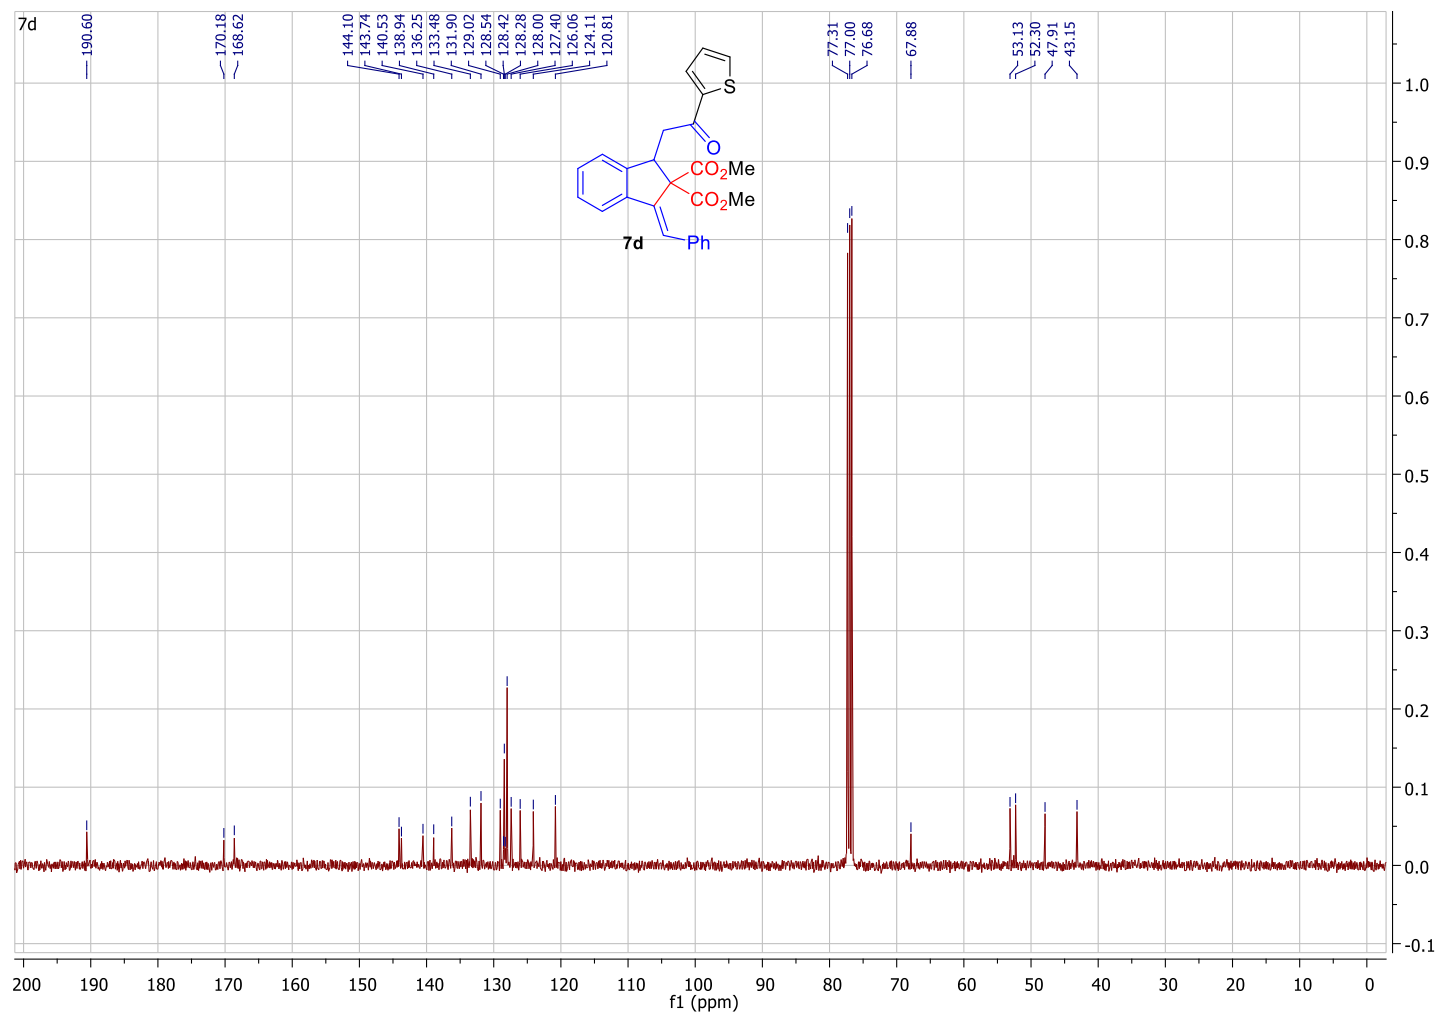

### HRMS: (7d)

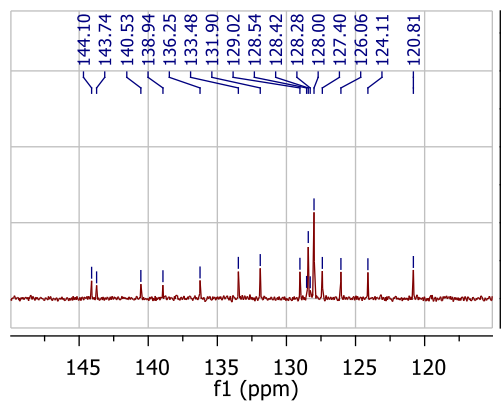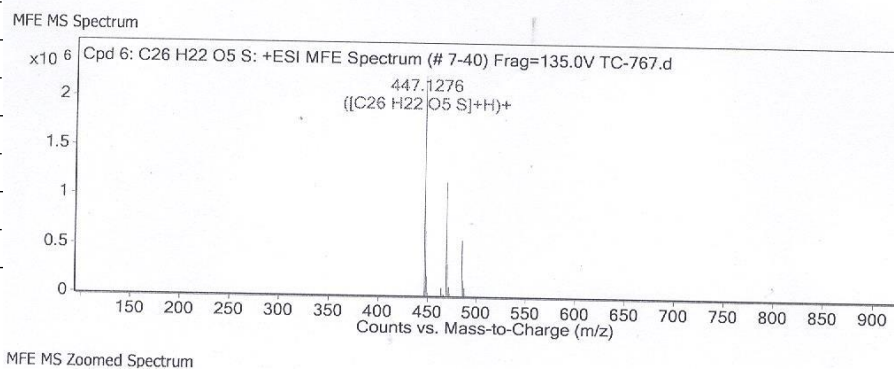

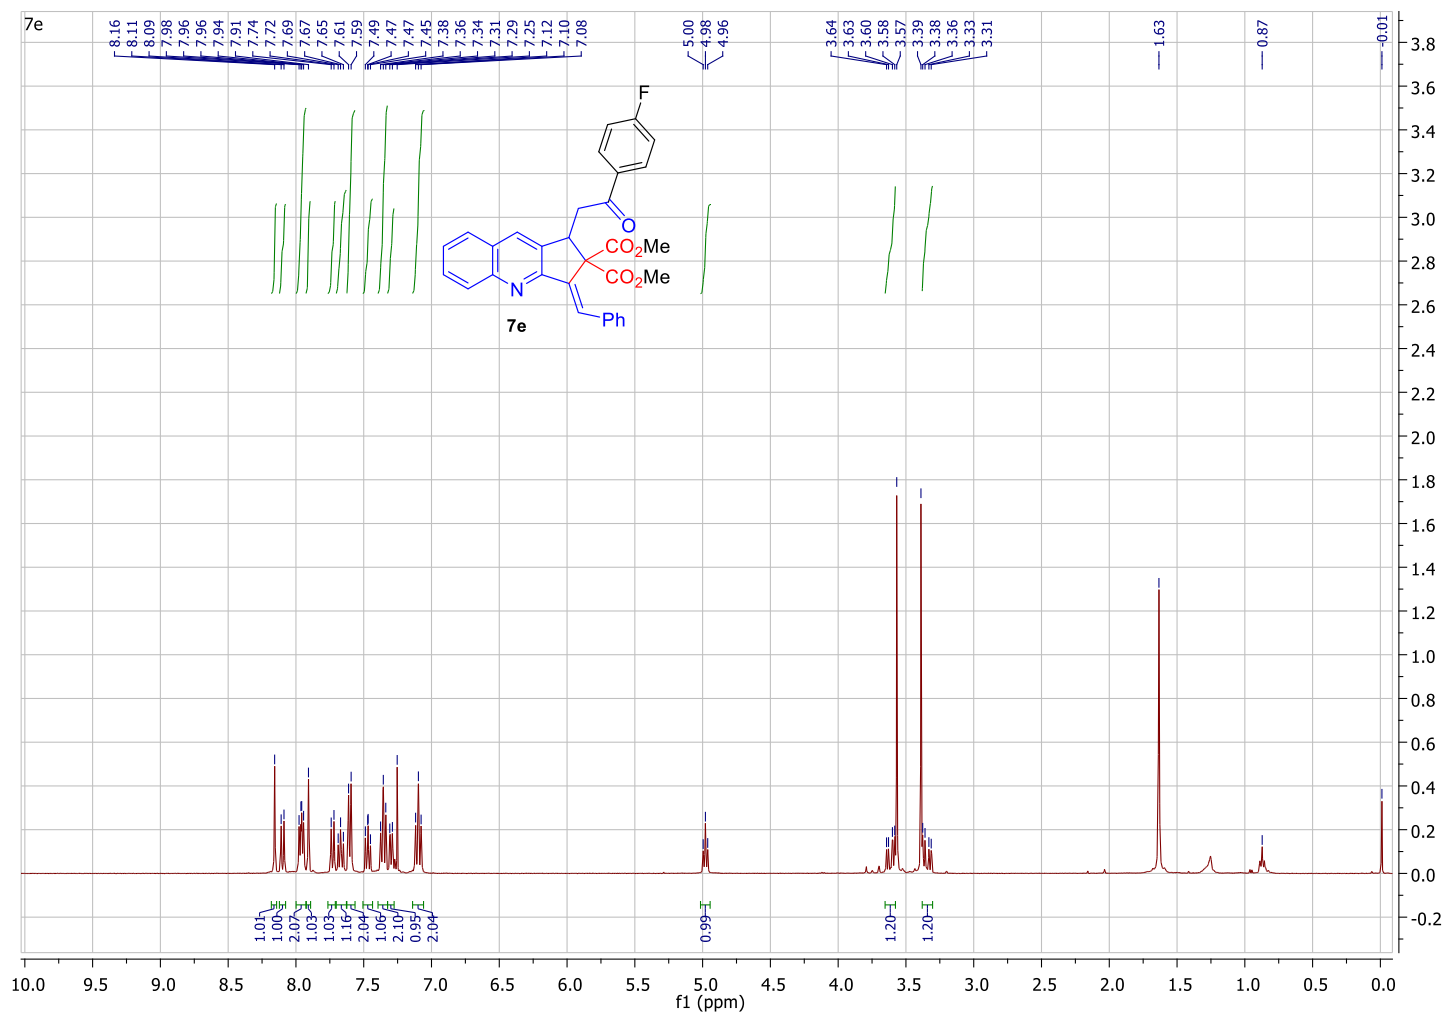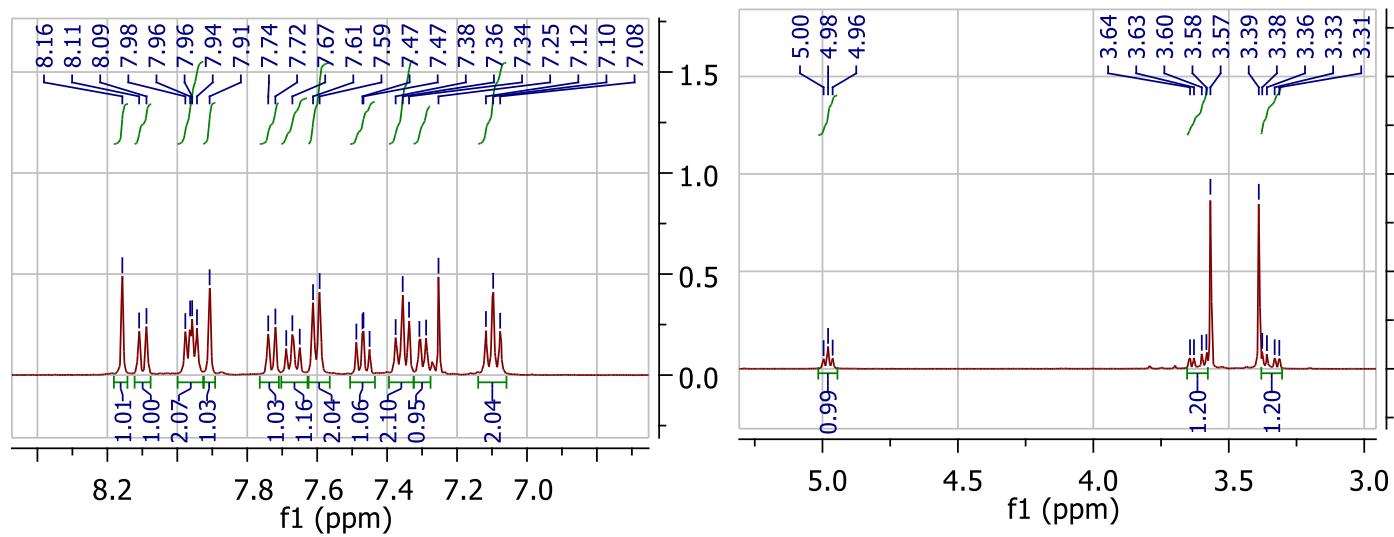



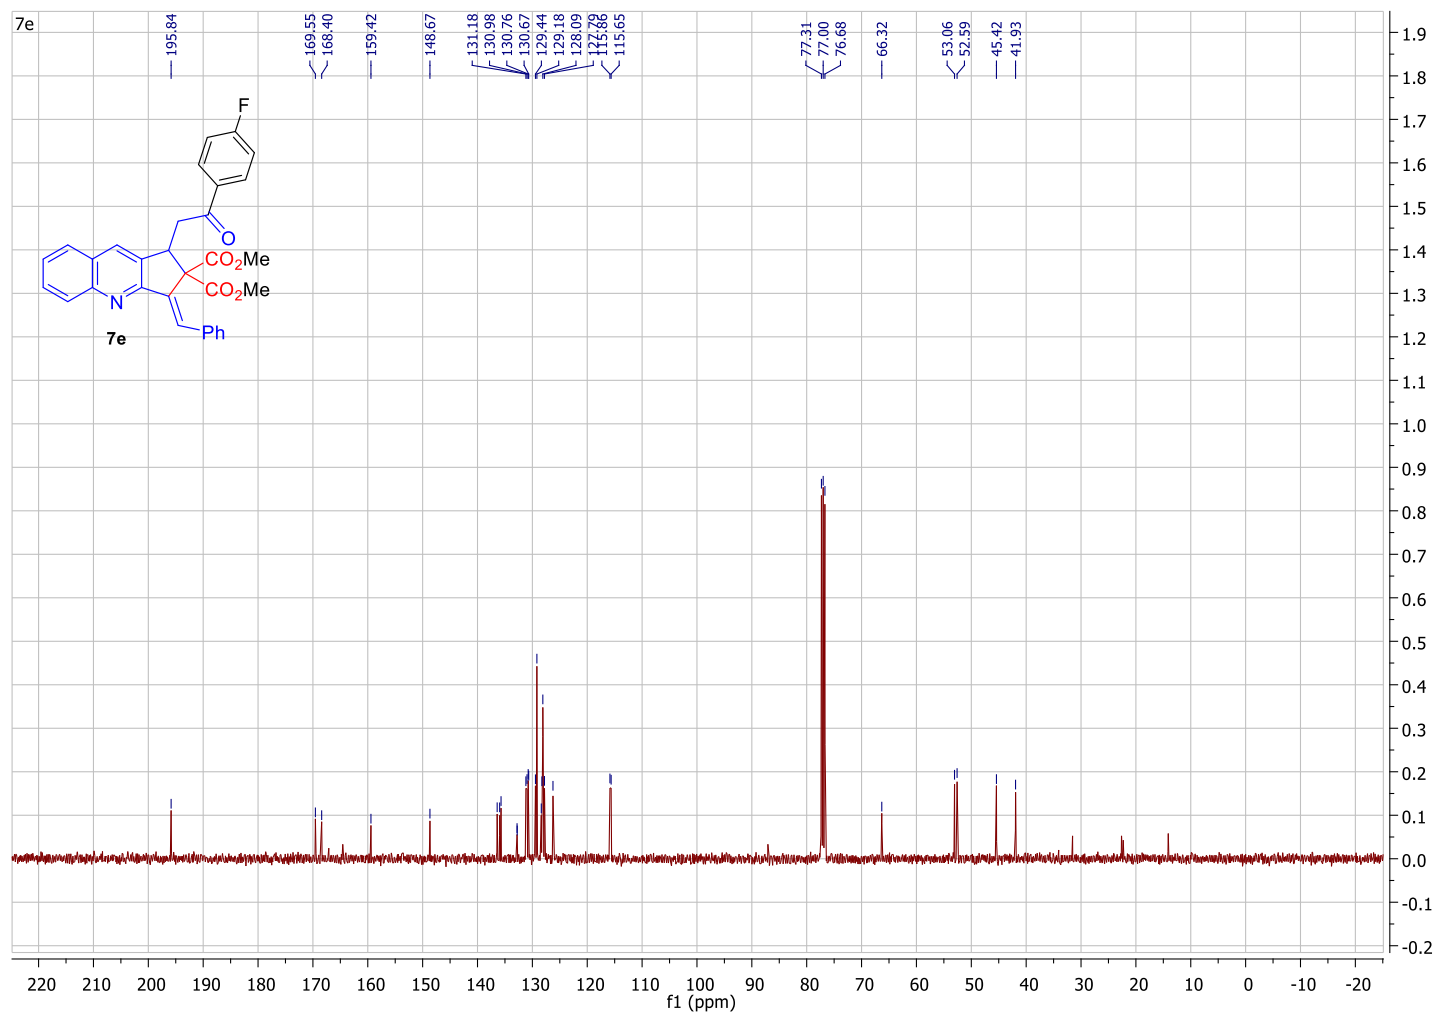

### HRMS: (7e)

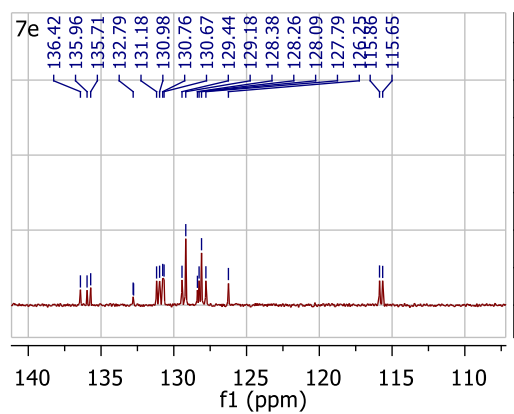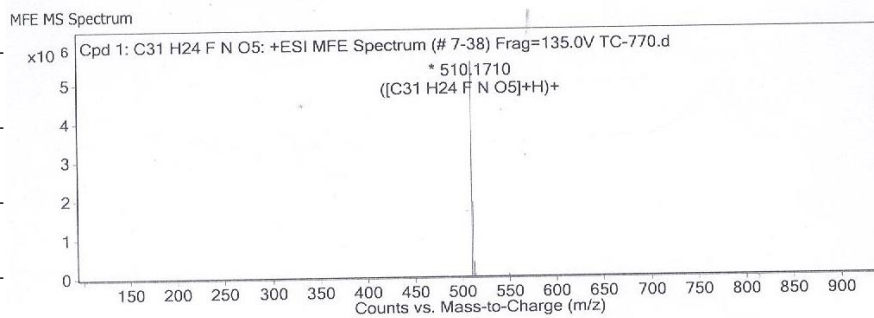

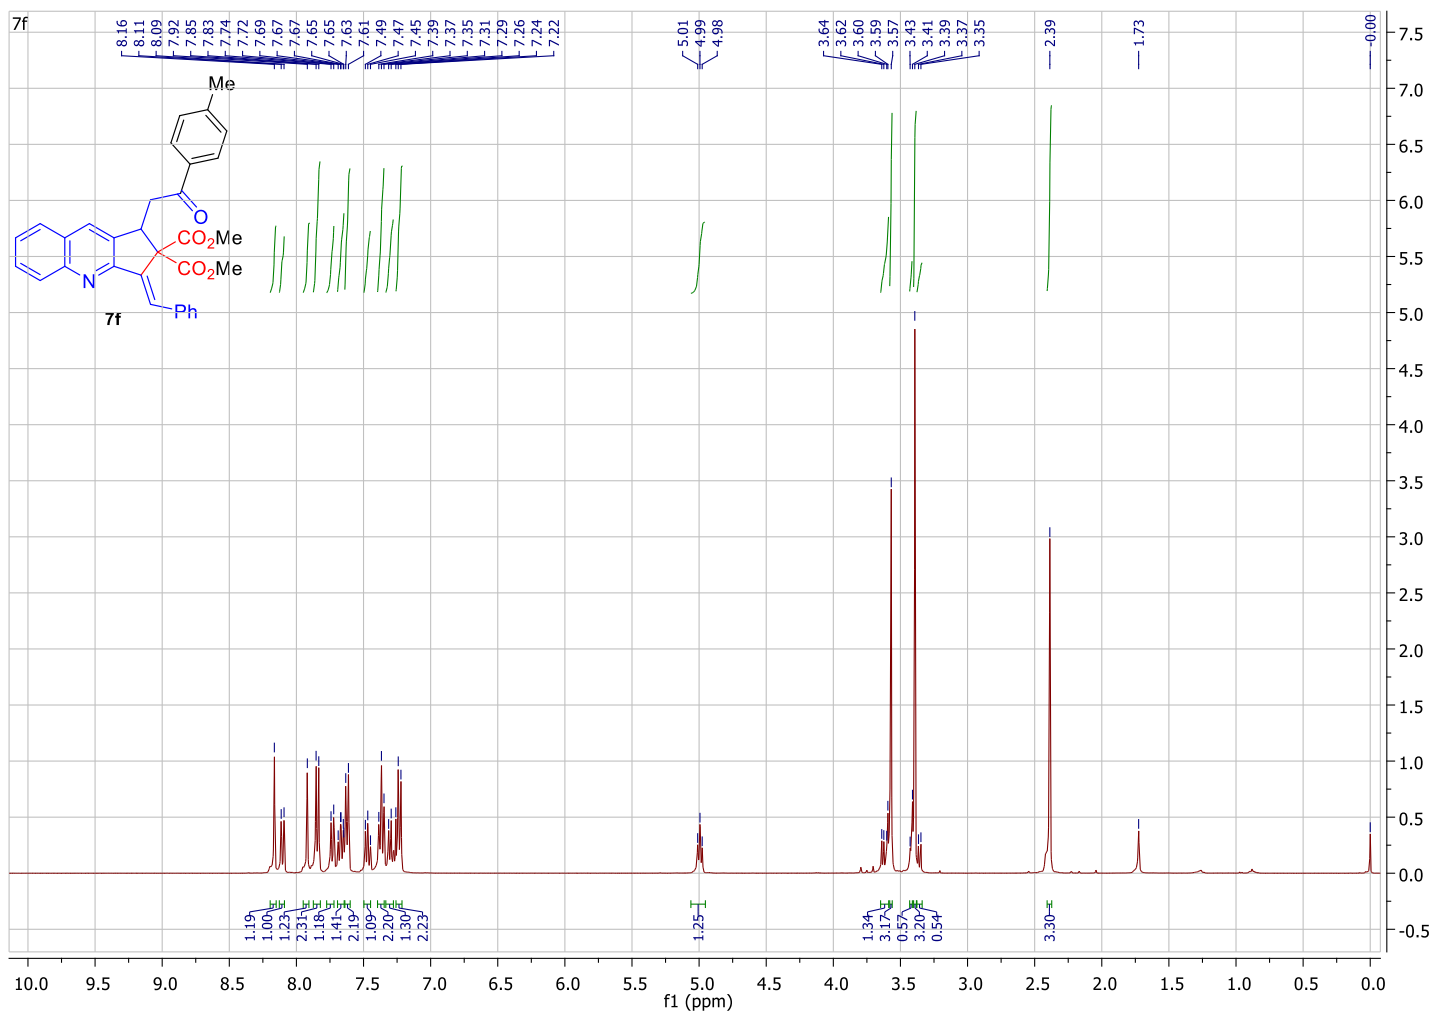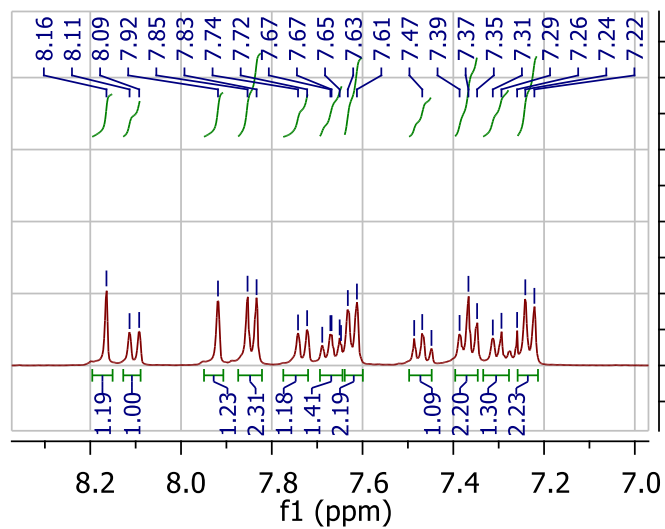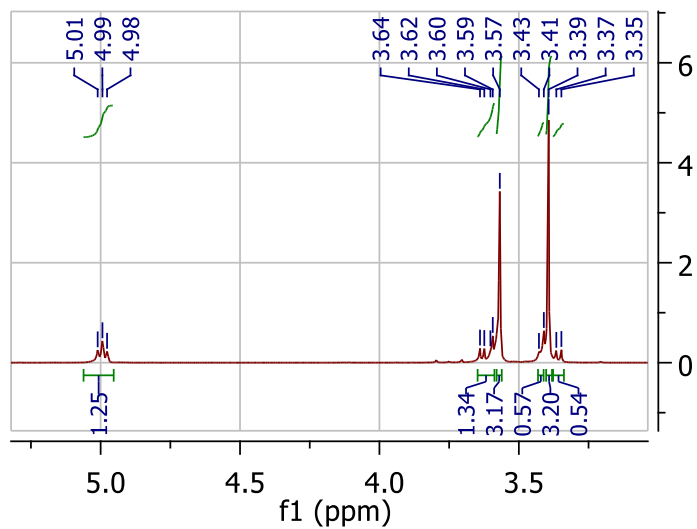

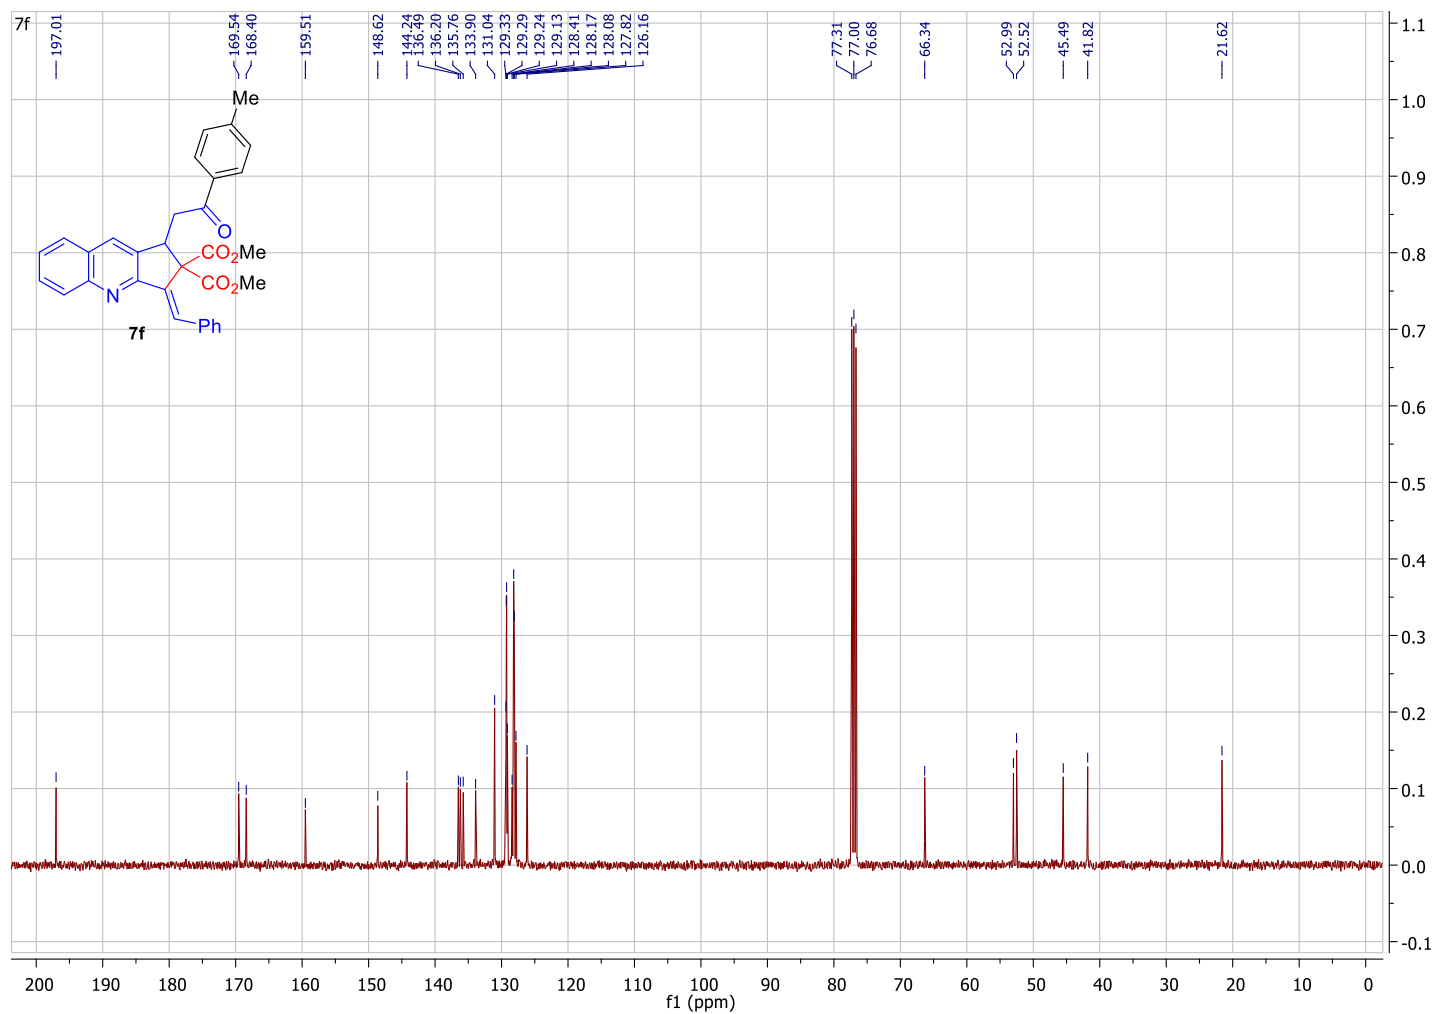

### HRMS: (7f)

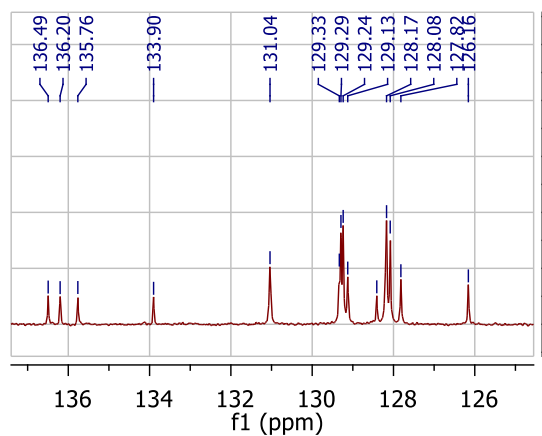

MFE MS Zoomed Spectrum

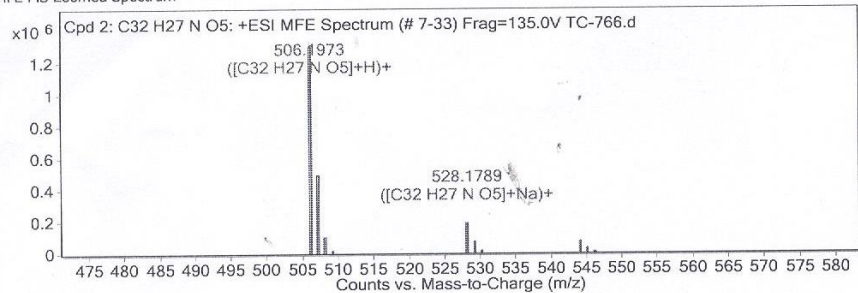

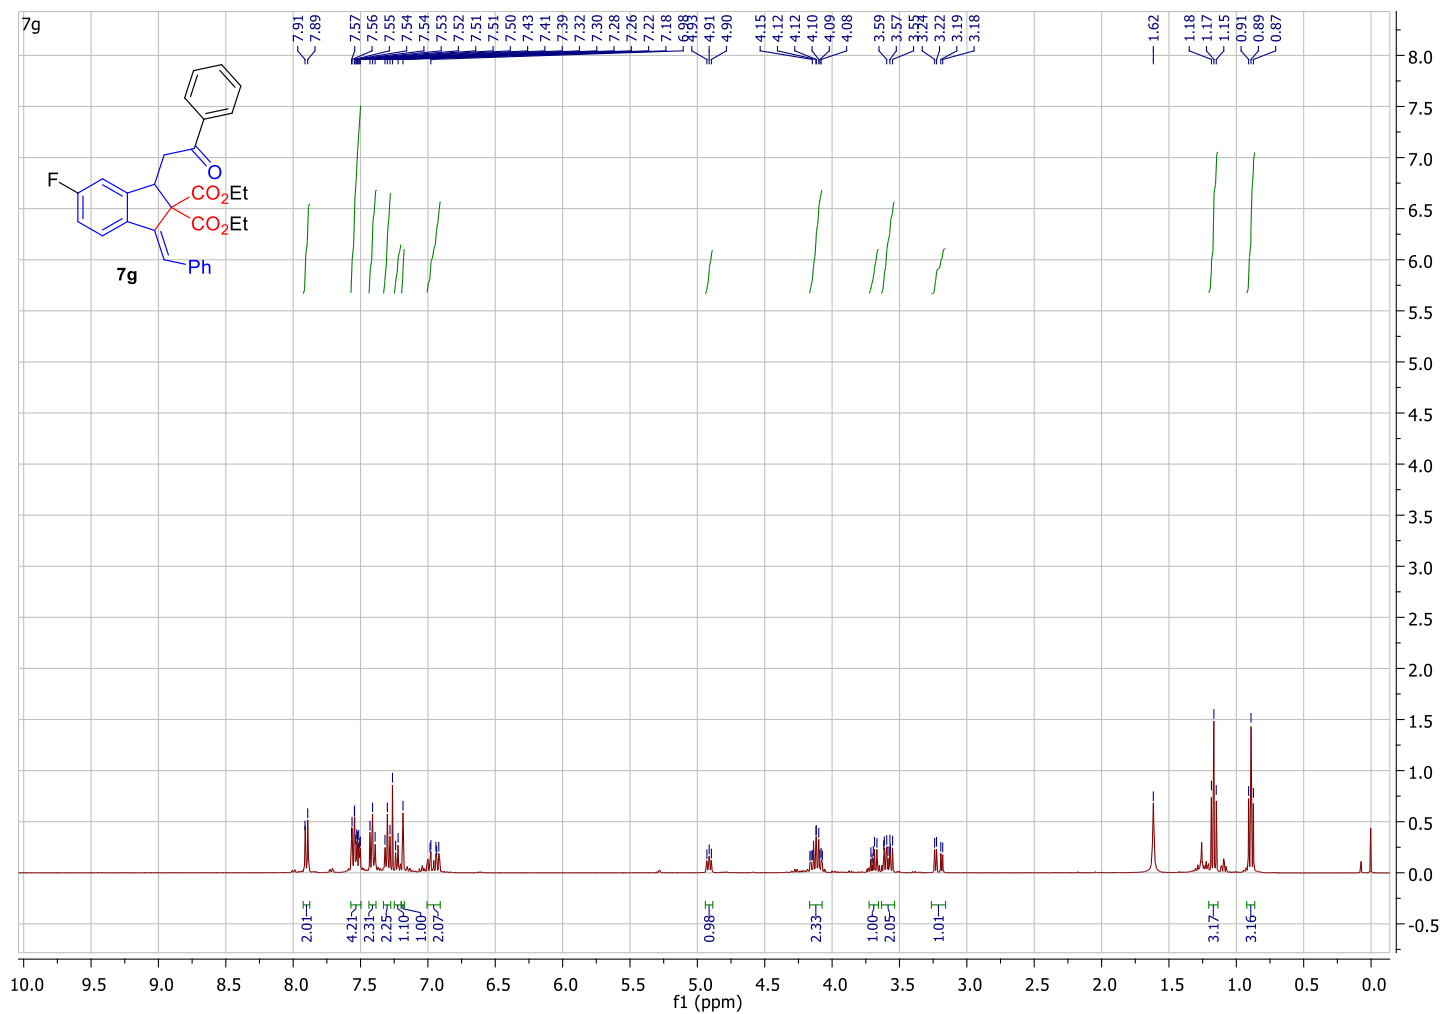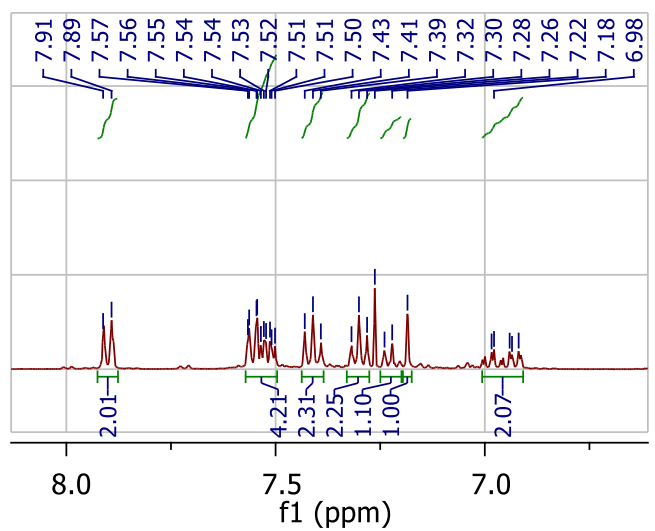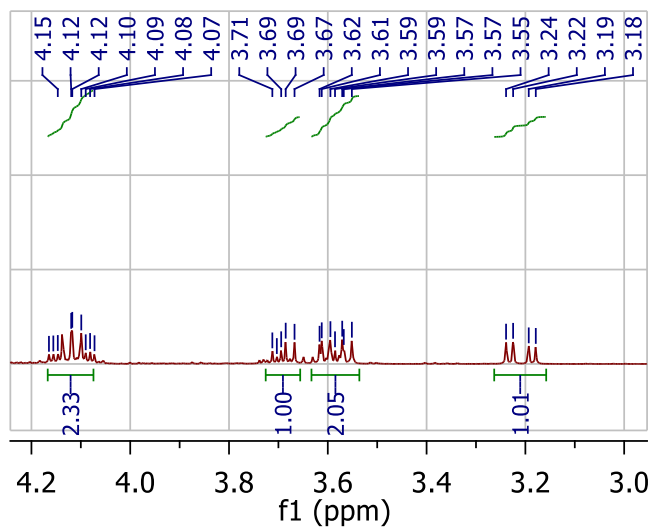

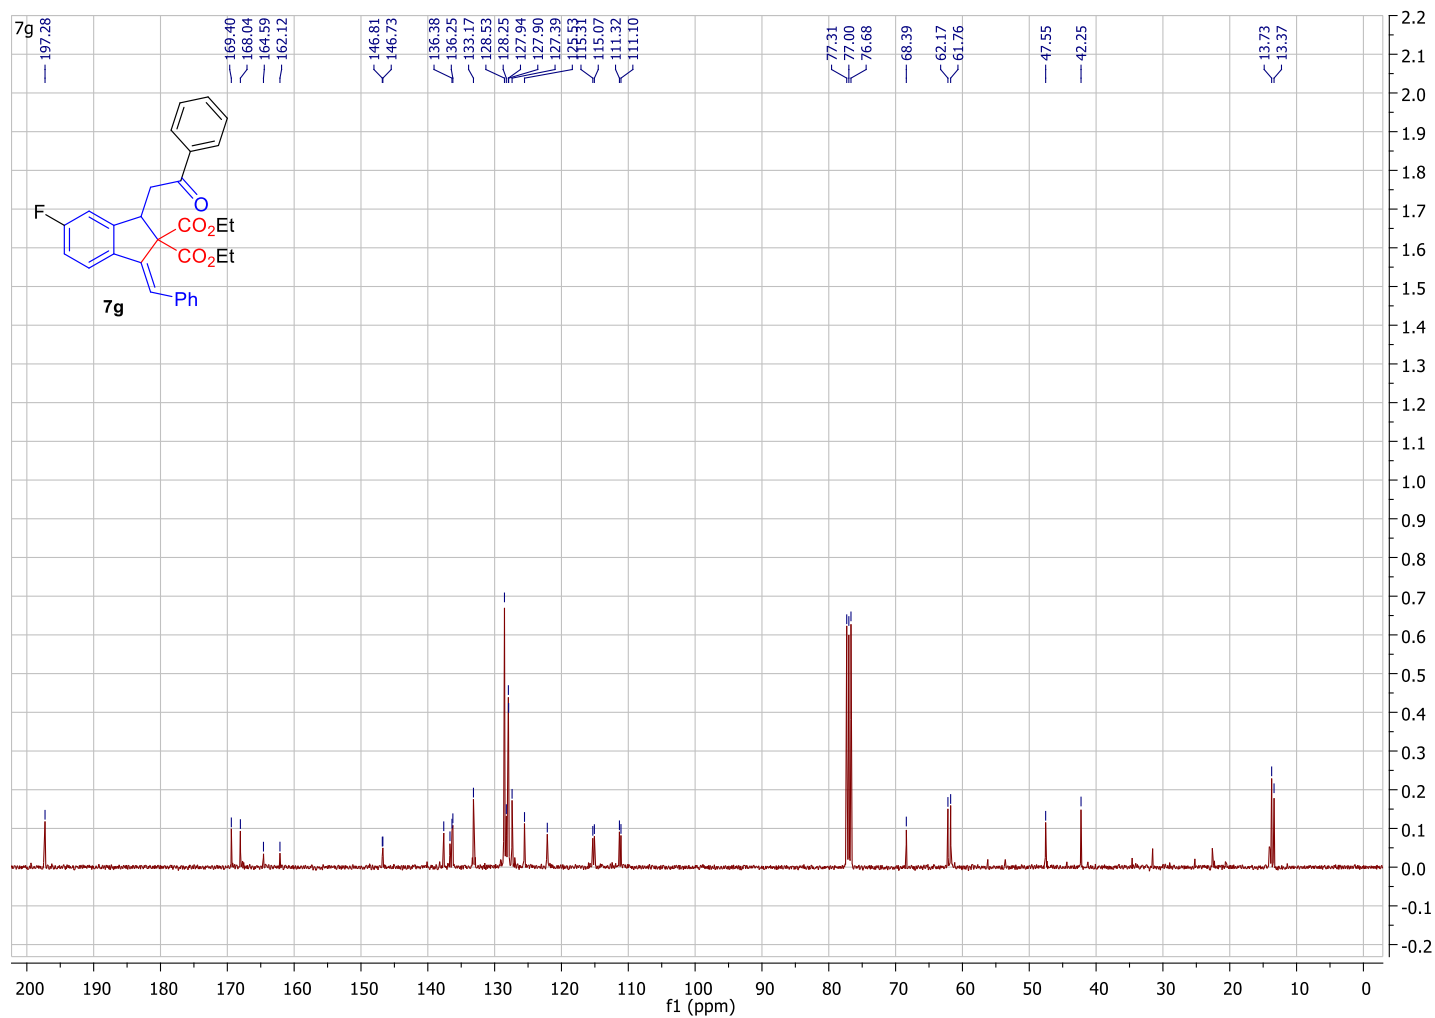

### HRMS: (7g)

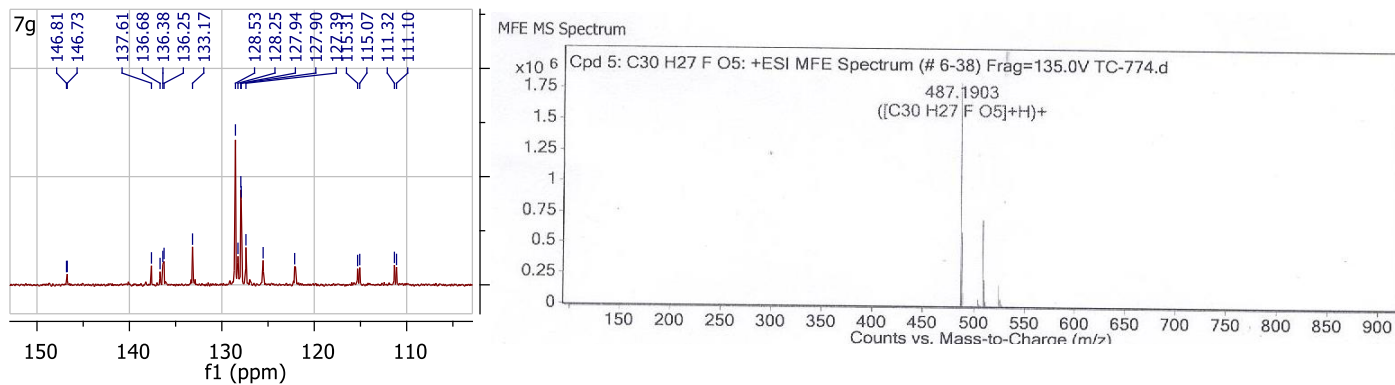

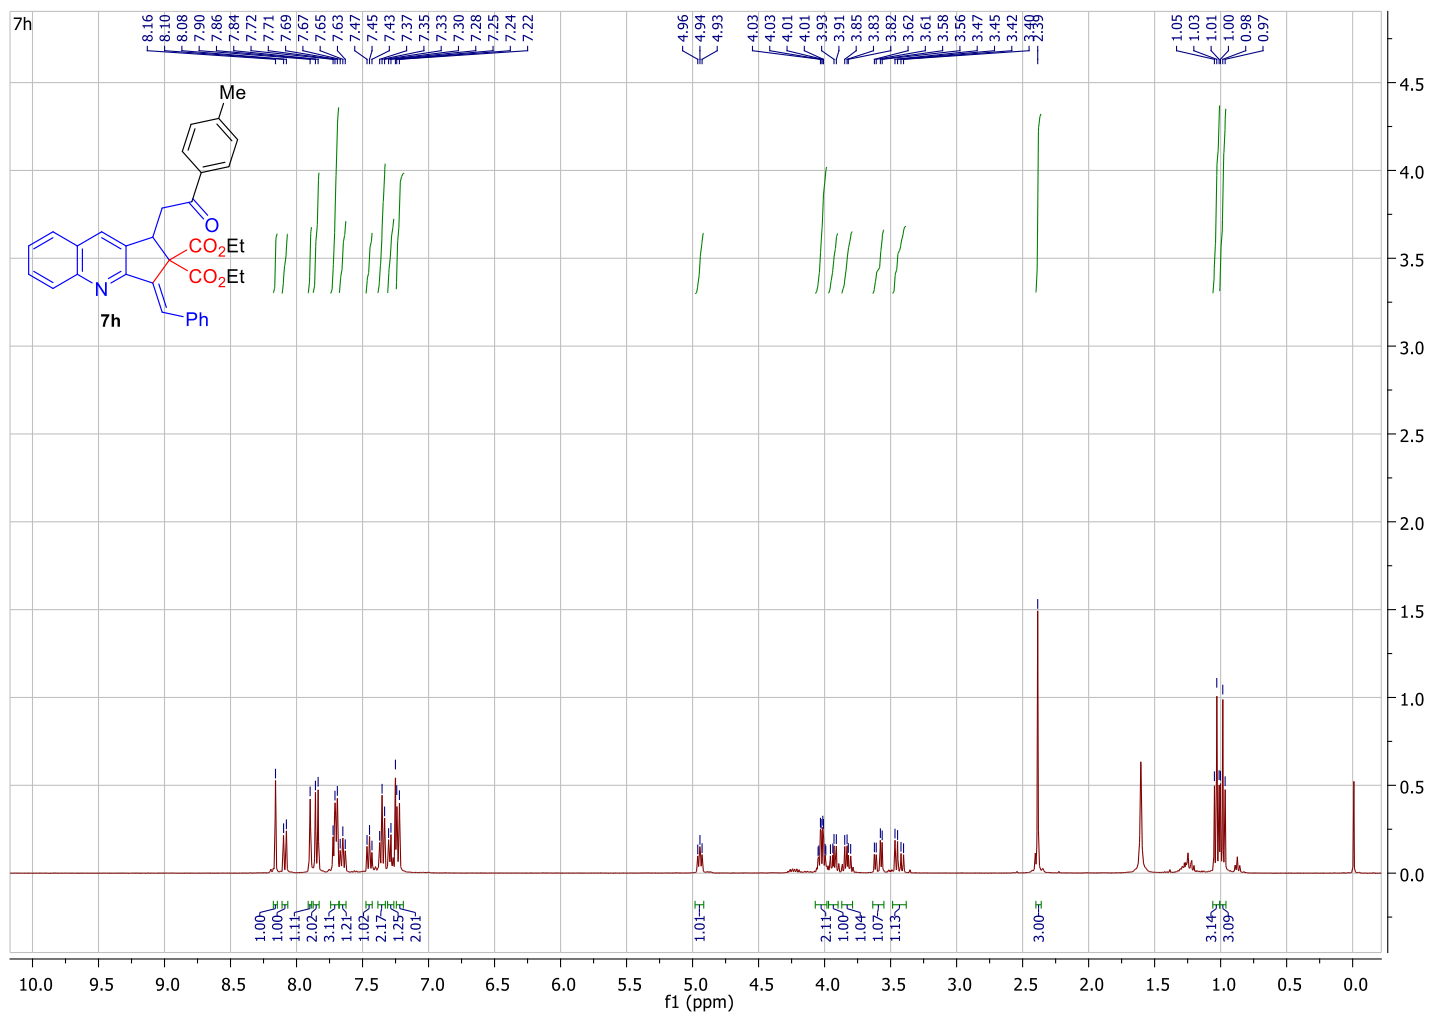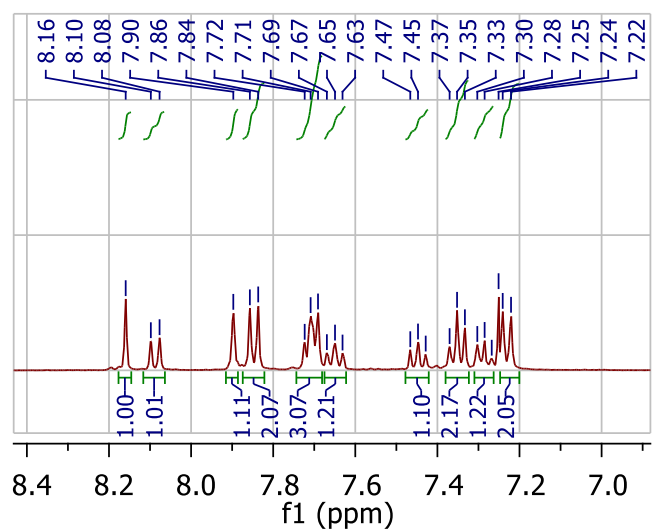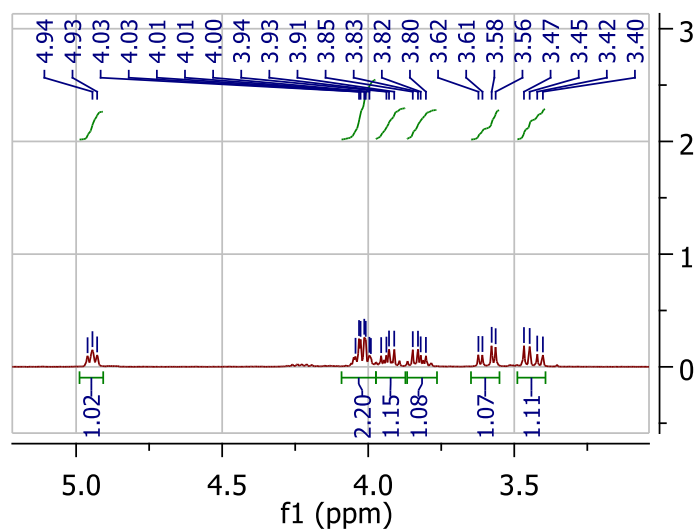

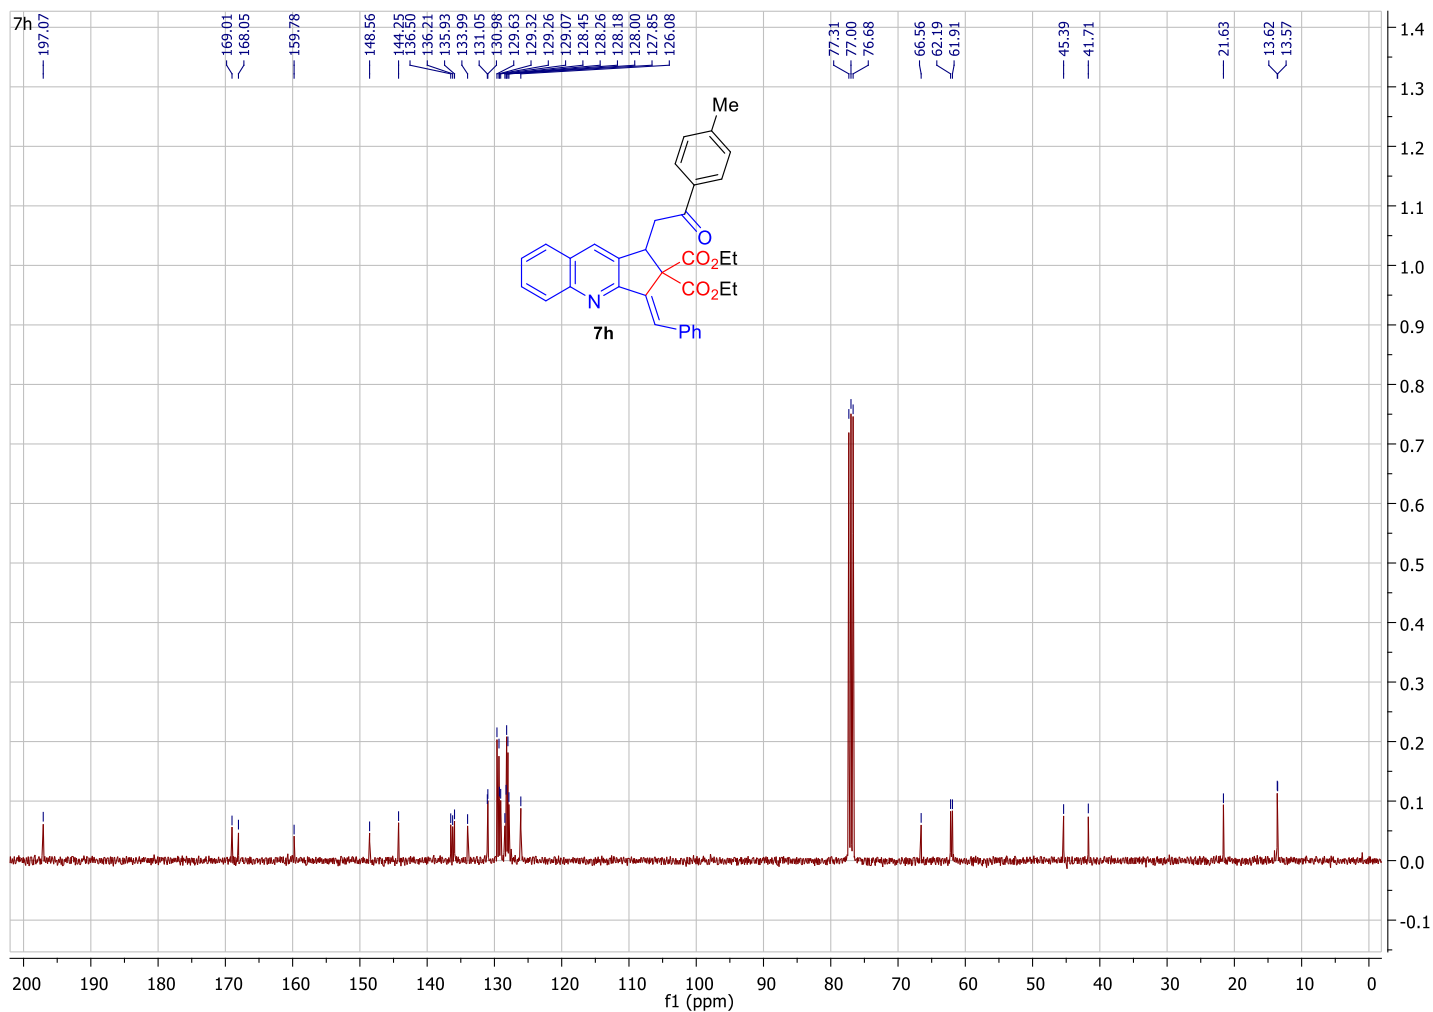

### HRMS: 7h

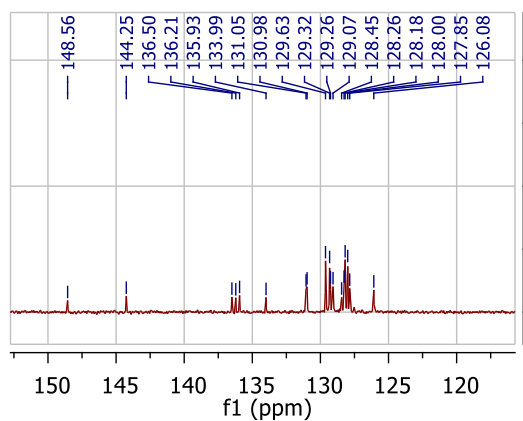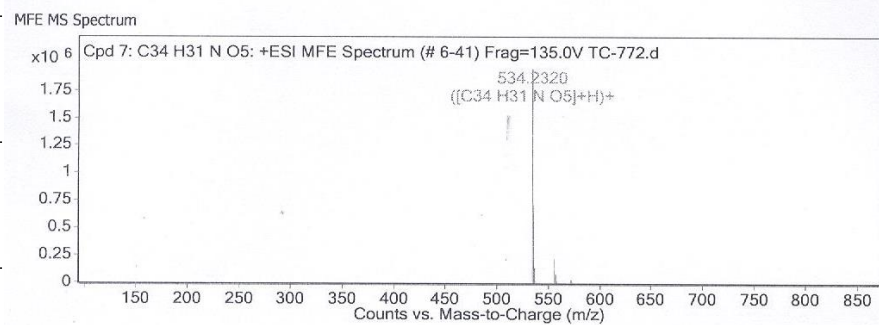

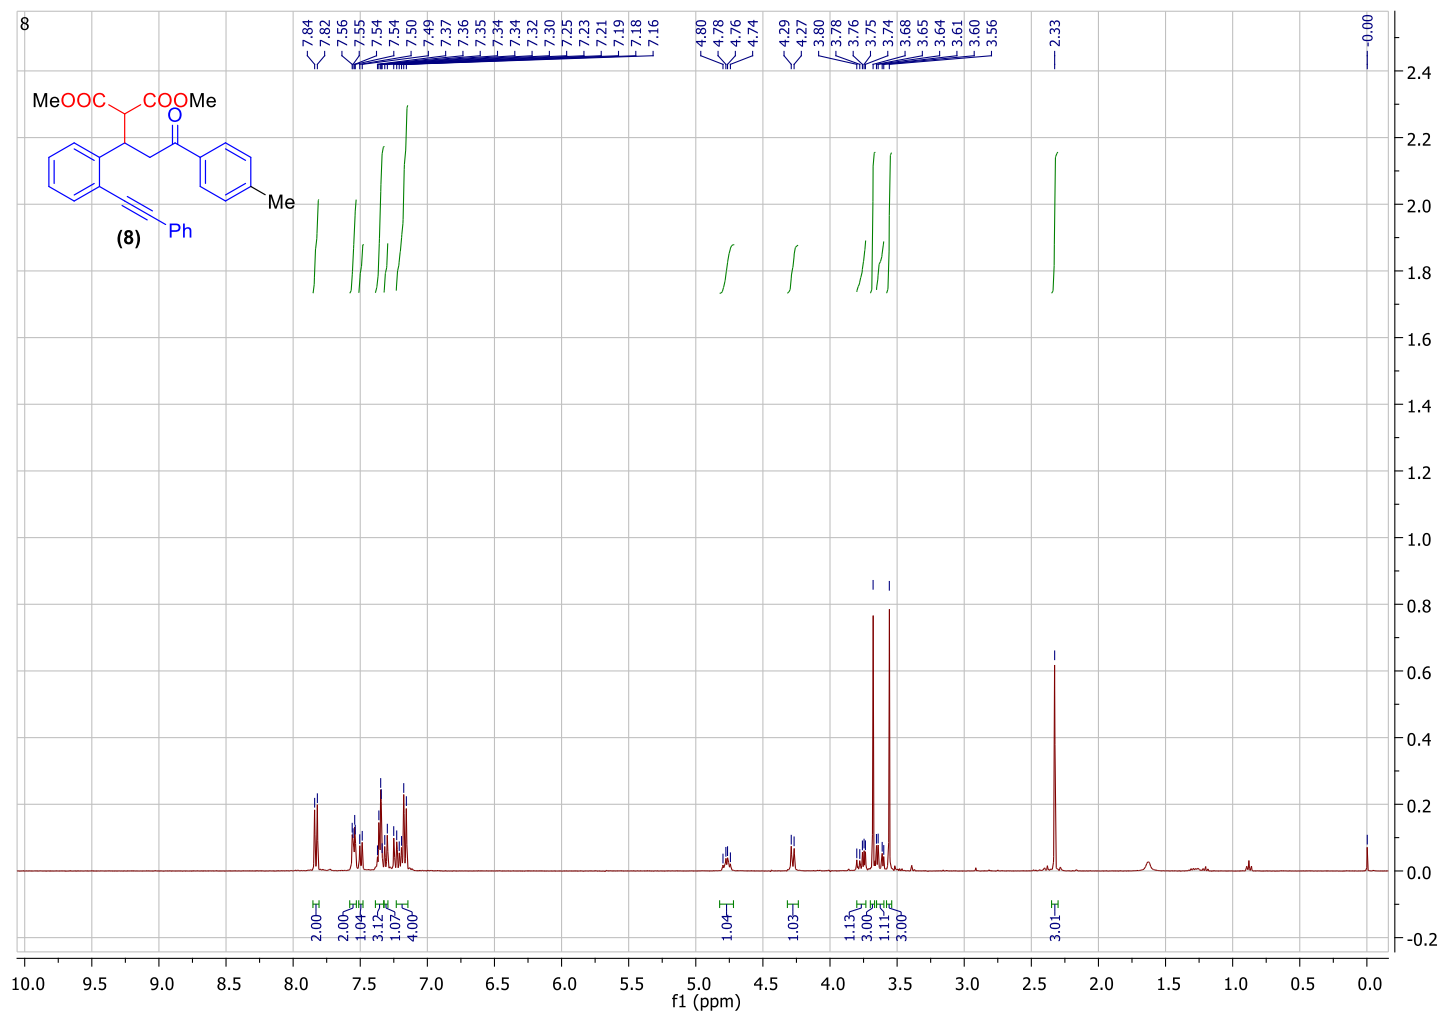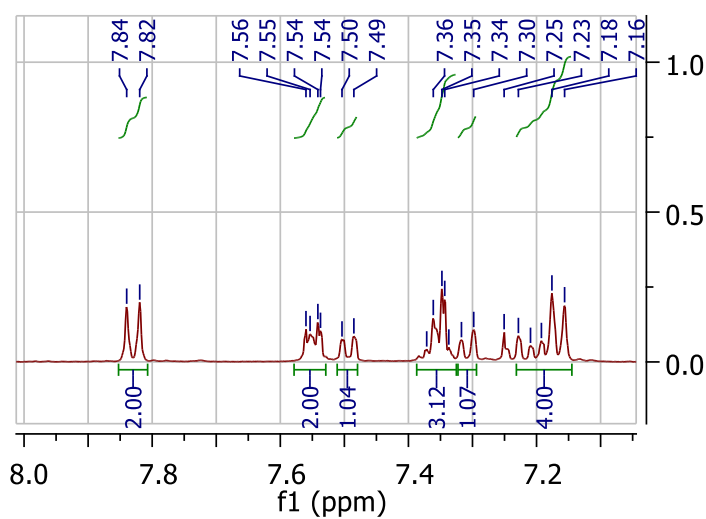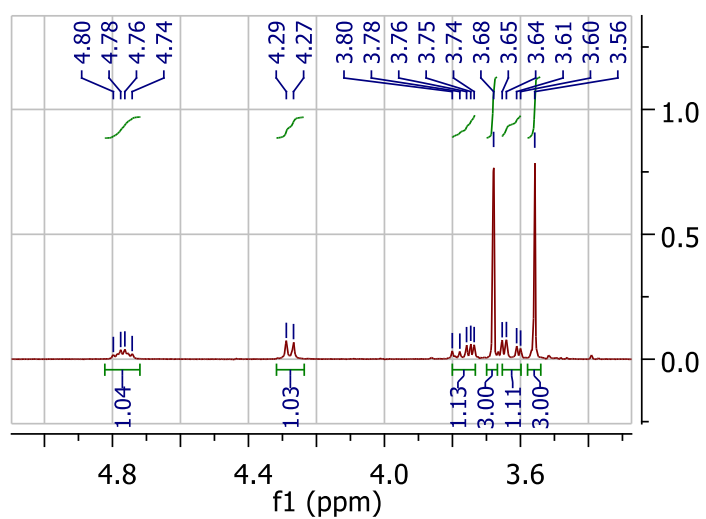



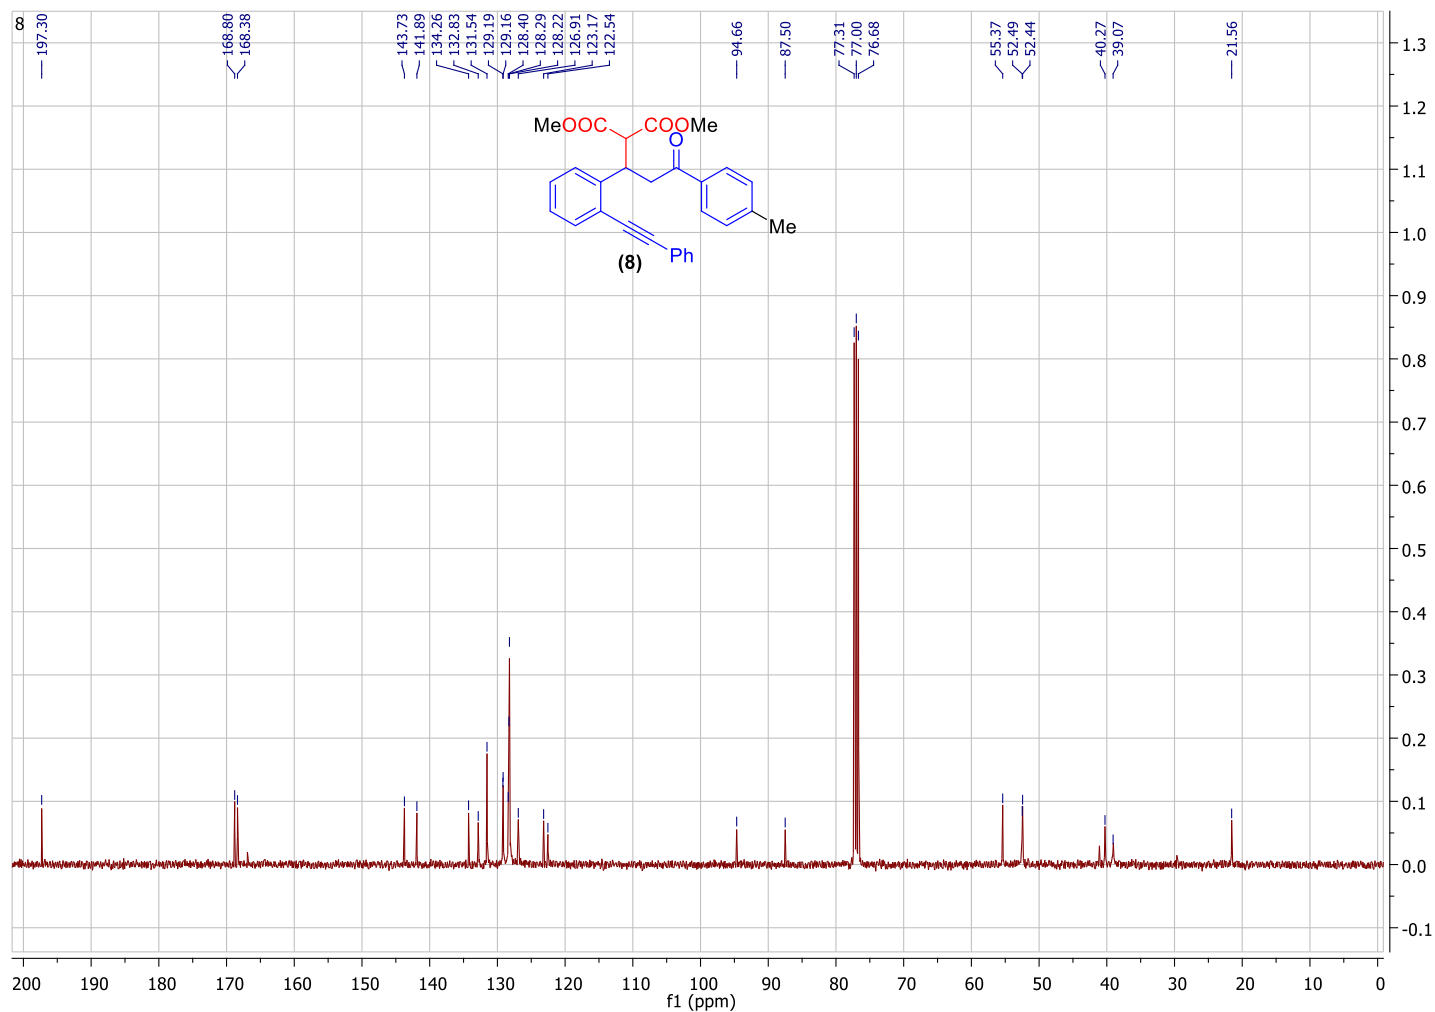

### HRMS: (8)

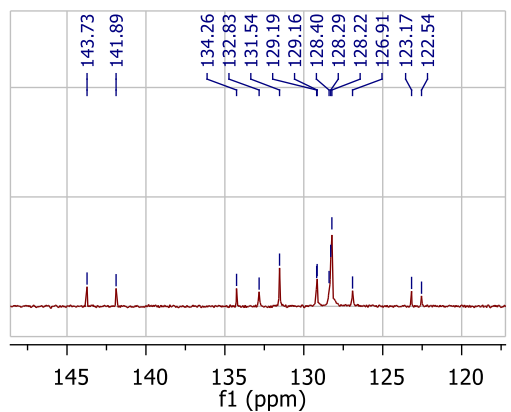

MFE MS Spectrum

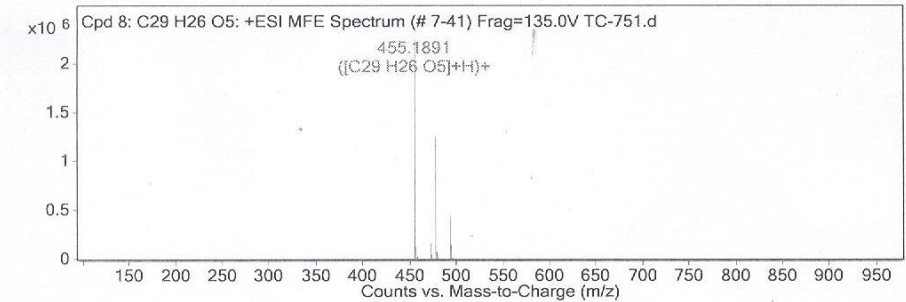

### 3. X-ray crystal structure data of (5a)

The single crystal X-ray data <sup>[S1]</sup> of the given compound was collected on an Oxford Xcalibur CCD diffractometer using graphite monochromated MoK  $\alpha$ -radiation ( $\lambda = 0.71073 \text{ \AA}$ ) at 293(2) K. The multi-scan correction was applied to it. The structure was solved by the direct method using SIR-92 and refined by full matrix least-square refinement technique on  $F^2$  using SHELXL97.<sup>2</sup> The hydrogen atoms were placed into the calculated position and included in the last cycle of the refinement. All the calculations were done using WinGX software package.<sup>3</sup> The main crystallographic data and structural refinement details of **5a** is given in Table S1. Atomic coordinates, bond lengths, bond angles, and thermal parameters for compound **5a** have been deposited at the Cambridge Crystallographic Data Centre (CCDC, deposit no. 1526254)

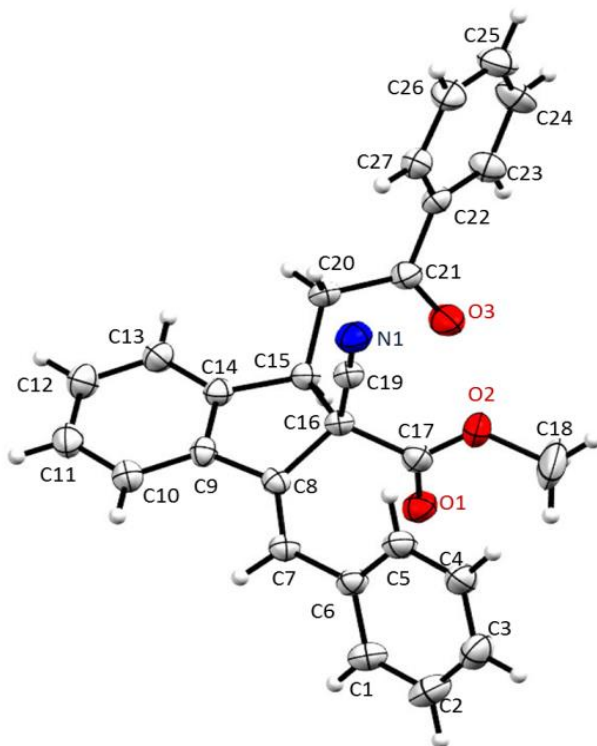

**Fig. 1s.** X-ray crystallographic ORTEP diagram of compound **5a**

**Table S1. Crystal data and structure refinement for 5a.**

|                                            |                                                 |
|--------------------------------------------|-------------------------------------------------|
| Empirical Formula                          | C <sub>27</sub> H <sub>21</sub> NO <sub>3</sub> |
| Formula Weight                             | 407.45                                          |
| Temperature                                | 293(2) K                                        |
| Wavelength                                 | 0.71073 Å                                       |
| Crystal system                             | Orthorhombic                                    |
| Space group                                | <i>Fdd2</i>                                     |
| a [Å]                                      | 37.951(3)                                       |
| b [Å]                                      | 24.111(2)                                       |
| c [Å]                                      | 9.5003(6)                                       |
| α [°]                                      | 90.00                                           |
| β [°]                                      | 90.00                                           |
| λ [°]                                      | 90.00                                           |
| Volume [Å <sup>3</sup> ]                   | 8694.4 (11)                                     |
| Z                                          | 16                                              |
| Density (calculated) [Mg/m <sup>3</sup> ]  | 1.245                                           |
| Absorption coefficient [mm <sup>-1</sup> ] | 0.081                                           |
| F(000)                                     | 3424                                            |
| Crystal size [mm <sup>3</sup> ]            | 0.28 x 0.19x 0.12                               |

|                                                |                                                               |
|------------------------------------------------|---------------------------------------------------------------|
| Theta range for data collection [°]            | 3.36 to 25.00                                                 |
| Index ranges                                   | -44 ≤ h ≤ 44, -28 ≤ k ≤ 28, -11 ≤ l ≤ 11                      |
| Reflections collected / unique                 | 25627 / 3819                                                  |
| R(int)                                         | 0.1343                                                        |
| Completeness of Theta at 25 °C (%)             | 99.8                                                          |
| Refinement method                              | Full-matrix least square on F <sup>2</sup>                    |
| Data/ restraints/ parameters                   | 3819/1/280                                                    |
| Goodness-of-fit on F <sup>2</sup>              | 1.031                                                         |
| Final R indices [I>2sigma (I)] <sup>a,b</sup>  | R <sub>1</sub> = 0.0660, <sup>w</sup> R <sub>2</sub> = 0.1385 |
| R indices (all data)                           | R <sub>1</sub> = 0.0947, <sup>w</sup> R <sub>2</sub> = 0.1609 |
| Largest diff. peak and hole [Å <sup>-3</sup> ] | 0.197 and -0.152 e.Å <sup>-3</sup>                            |

$$^aR = \sum(|F_o| - |F_c|) / \sum |F_o| ; ^bR_w = \{ \sum [w(F_o^2 - F_c^2)^2] / \sum [w(F_o^2)^2] \}^{1/2}$$

## References:

- 1.G.M. Sheldrick, *ActaCrystallogr.,Sect. A*, **1990**,46, 467.
- 2.G.M. Sheldrick, *SHELXL-97, Computer program for crystal structure refinement* University of Göttingen, Germany, **1997**.
- 3.L. J. Farrugia, WinGX Version 1.80.05, *An integrated system of Windows Programs for the Solution, Refinement and Analysis of Single Crystal X-Ray Diffraction Data*,Department of Chemistry, University of Glasgow (**1997-2009**).

[S1]. CCDC. 1526254 (**5a**) contains the supplementary crystallographic data for this paper. These data can be obtained free of charge from The Cambridge Crystallographic Data Centre via [www.ccdc.cam.ac.uk/data\\_request/cif](http://www.ccdc.cam.ac.uk/data_request/cif).
